# Supplementary material for: A spatially detailed blue water footprint of the United States economy
Source: Copernicus journal article supplement (doi:10.5194/hess-22-3007-2018), 2018-05-22
Supplement: Supplementary file 1 [file hess-22-3007-2018-supplement.zip]

# **A Spatially Detailed Blue Water Footprint of the United States Economy**

## **Supplemental Information**

*Richard R. Rushforth<sup>1\*</sup>, Benjamin L. Ruddell<sup>1</sup>*

*<sup>1</sup>School of Informatics, Computing, and Cyber Systems at Northern Arizona University*

*\*Corresponding author*

*Correspondence Emails:*

*Richard.Rushforth@nau.edu*

1 **SI 1.1 Supplemental Tables and Maps – Withdrawal-Based Virtual Water Flows**

2 **Table SI-1. U.S. Water Footprint and Virtual Water Statistics (Urban classes Central,**  
3 **Fringe, Medium, Small, Micro, and Non-Core)**

| Virtual Water Metric                                                       | Withdrawal-Based<br>(CU =1) | CU <sub>max</sub> | CU <sub>med</sub> | CU <sub>min</sub> |
|----------------------------------------------------------------------------|-----------------------------|-------------------|-------------------|-------------------|
| Water Use – Domestic (Mm <sup>3</sup> )                                    | 37,566                      | 27,423            | 4,884             | 0                 |
| Water Use – Non-Domestic (Mm <sup>3</sup> )                                | 366,687                     | 200,712           | 181,773           | 60,722            |
| Water Use – Total (Mm <sup>3</sup> )                                       | 404,253                     | 228,135           | 186,657           | 60,722            |
| Virtual Water Outflows, VW <sub>Out</sub> (Mm <sup>3</sup> )               | 362,690                     | 196,857           | 178,622           | 59,870            |
| Virtual Water Inflows, VW <sub>In</sub> (Mm <sup>3</sup> )                 | 359,282                     | 190,866           | 173,931           | 60,265            |
| Virtual Water Balance, VW <sub>Bal</sub> (Mm <sup>3</sup> )                | -3,409                      | -5,991            | -4,691            | 395               |
| Virtual Water Export, VW <sub>Export</sub> (Mm <sup>3</sup> )              | 10,671                      | 9,039             | 7,739             | 2,653             |
| Virtual Water Import, VW <sub>Import</sub> (Mm <sup>3</sup> )              | 7,263                       | 3,048             | 3,048             | 3,048             |
| Non-Domestic Water Footprint (Mm <sup>3</sup> )                            | 363,279                     | 194,722           | 177,082           | 61,117            |
| Total Water Footprint (Mm <sup>3</sup> )                                   | 400,844                     | 222,144           | 181,966           | 61,117            |
| Total Water Footprint Per Capita (m <sup>3</sup> capita <sup>-1</sup> )    | 1,298                       | 720               | 589               | 198               |
| Central Water Footprint Per Capita (m <sup>3</sup> capita <sup>-1</sup> )  | 828                         | 399               | 282               | 97                |
| Fringe Water Footprint Per Capita (m <sup>3</sup> capita <sup>-1</sup> )   | 981                         | 368               | 250               | 83                |
| Medium Water Footprint Per Capita (m <sup>3</sup> capita <sup>-1</sup> )   | 1,705                       | 1,076             | 936               | 315               |
| Small Water Footprint Per Capita (m <sup>3</sup> capita <sup>-1</sup> )    | 1,794                       | 1,139             | 992               | 333               |
| Micro Water Footprint Per Capita (m <sup>3</sup> capita <sup>-1</sup> )    | 1,876                       | 1,169             | 1,024             | 345               |
| Non-Core Water Footprint Per Capita (m <sup>3</sup> capita <sup>-1</sup> ) | 1,927                       | 1,217             | 1,053             | 344               |
| Rural to Urban VW Transfers (Mm <sup>3</sup> )                             | 114,953                     | 70,648            | 66,524            | 22,496            |
| Rural to Rural VW Transfers (Mm <sup>3</sup> )                             | 91,682                      | 63,698            | 60,676            | 20,614            |
| Urban to Urban VW Transfers (Mm <sup>3</sup> )                             | 111,458                     | 39,921            | 32,338            | 10,459            |
| Urban to Rural VW Transfers (Mm <sup>3</sup> )                             | 33,876                      | 13,551            | 11,345            | 3,647             |

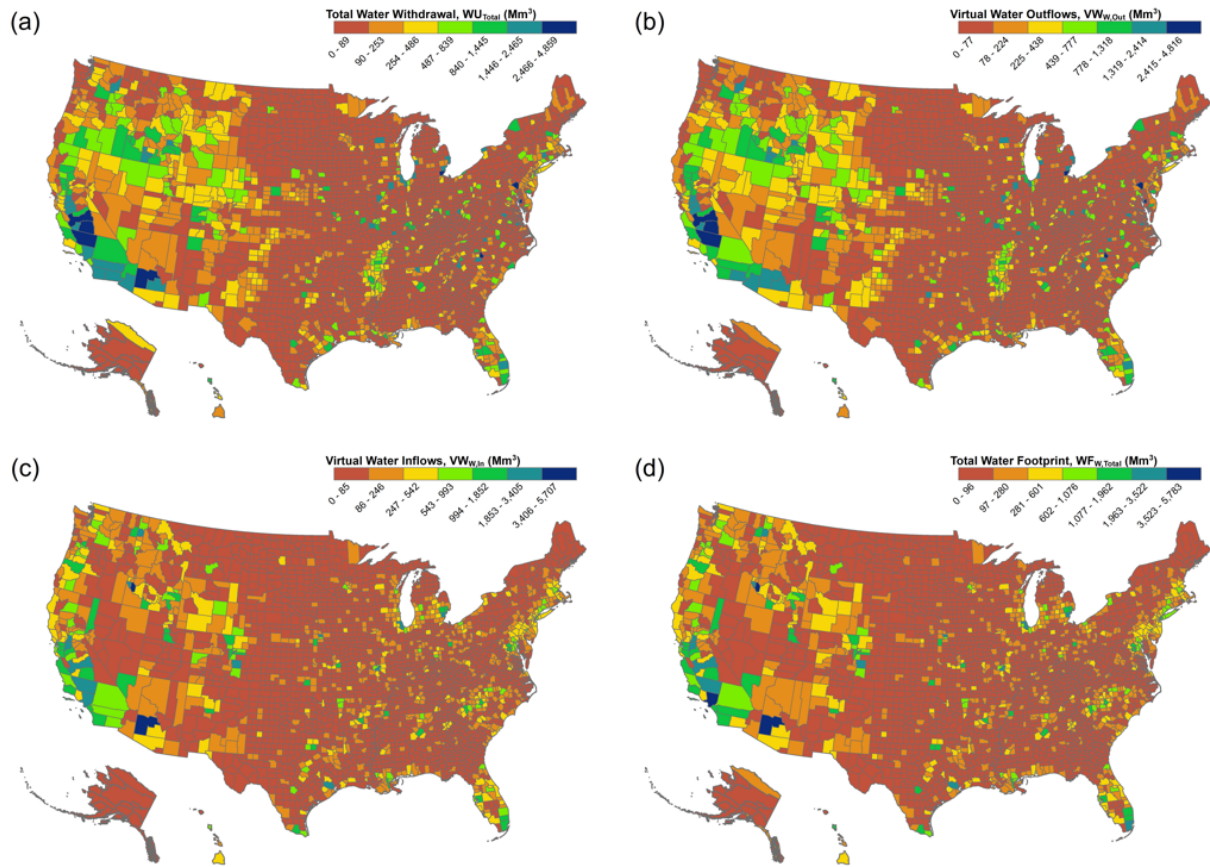

**Figure SI-1. (a) Total water withdrawals by county in the U.S. (b) Virtual water outflows from U.S. are concentrated in the western United States, particularly where irrigated agriculture is located, in addition to the High Plains, Mississippi Embayment, and south Florida. (c) Virtual water inflows are concentrated in Western U.S. cities, Western U.S. agricultural counties, metropolitan regions in the Eastern U.S., and in particular where a city also serves as a regional distribution center or has prominent food processing industry (Little Rock and Northwestern Arkansas, Chicago and Houston). (d) Annual Withdrawal-Based ( $CU = 1$ ) Water Footprint,  $F_{Total}$  [Mm<sup>3</sup>], for U.S. Counties. Detailed economic sector-level water footprint maps and tables are in the Supplemental Information.**

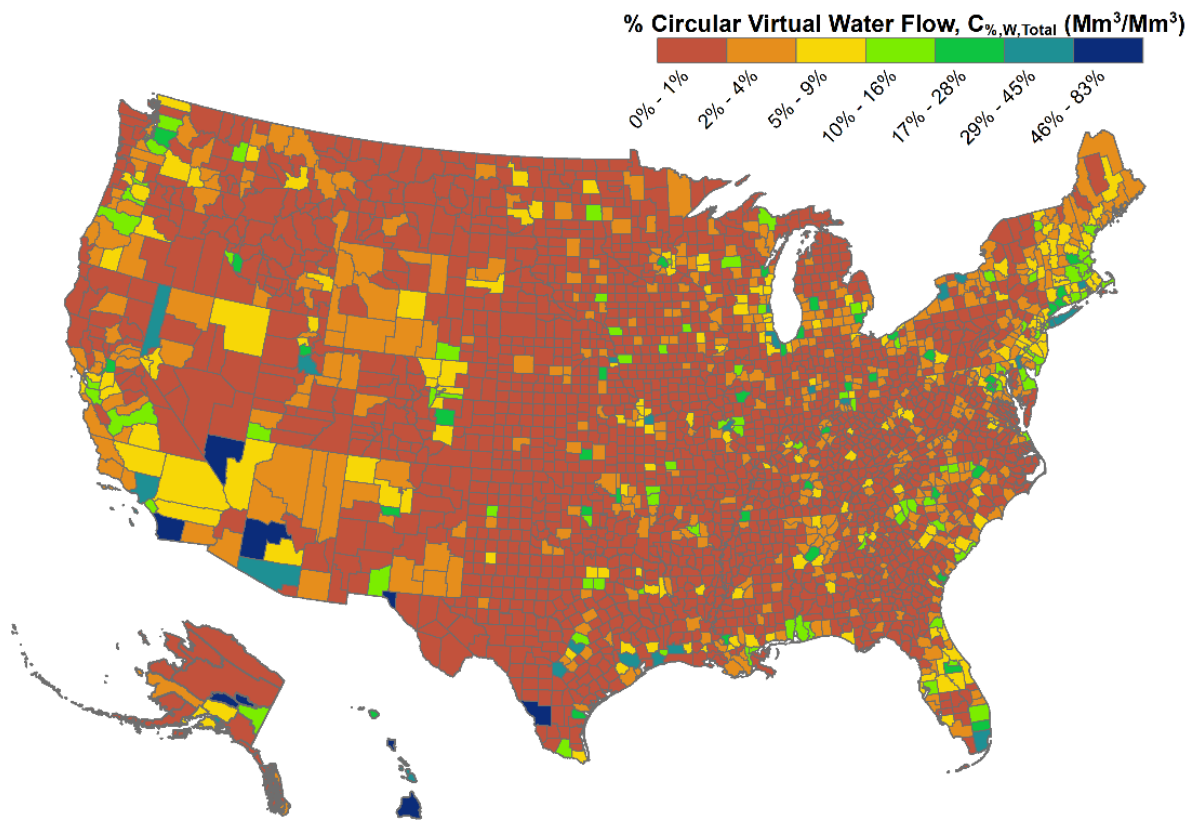

**Figure SI-2. Circular virtual water flows ( $CU = 1$ ), or virtual water flows that originate and terminate within the same county.**

29 **Table SI-2. Virtual Water Transfers Between Urban and Rural Areas (Mm<sup>3</sup>)**

|                                                    |                               | ← Urban   Rural → |        |        |        |        |          |                  |                       |
|----------------------------------------------------|-------------------------------|-------------------|--------|--------|--------|--------|----------|------------------|-----------------------|
| <div> <div>↑</div> <div>← Rural Urban</div> </div> | Urban/Rural<br>Classification | Central           | Fringe | Medium | Small  | Micro  | Non-Core | VW <sub>in</sub> | VW <sub>Balance</sub> |
|                                                    | Central                       | 12,025            | 13,303 | 11,994 | 7,642  | 9,391  | 8,264    | 62,618           | 34,395                |
|                                                    | Fringe                        | 6,299             | 15,238 | 10,811 | 8,180  | 12,289 | 10,462   | 63,280           | 17,886                |
|                                                    | Medium                        | 5,750             | 7,636  | 28,402 | 14,336 | 20,417 | 23,973   | 100,513          | 28,796                |
|                                                    | Small                         | 1,516             | 3,477  | 8,452  | 8,543  | 10,899 | 14,215   | 47,101           | -3,653                |
|                                                    | Micro                         | 1,713             | 3,469  | 7,366  | 7,130  | 13,026 | 14,068   | 46,772           | -26,904               |
|                                                    | Non-Core                      | 919               | 2,272  | 4,692  | 4,923  | 7,655  | 11,222   | 31,684           | -50,521               |
|                                                    | VW <sub>out</sub>             | 28,222            | 45,394 | 71,717 | 50,754 | 73,676 | 82,205   | 351,969          | —                     |

31 **Table SI-3. U.S. Virtual Water Exports and Imports to and Balances with World Regions**

| Region                                     | Value<br>(M\$)         | Weight<br>(kilotons)      | Virtual<br>Water<br>Export<br>(Mm <sup>3</sup> )  | % SW        | % GW        |
|--------------------------------------------|------------------------|---------------------------|---------------------------------------------------|-------------|-------------|
| Canada                                     | 252,368                | 167,912                   | 2,114                                             | 57 %        | 43 %        |
| Mexico                                     | 187,431                | 158,946                   | 2,326                                             | 46 %        | 54 %        |
| Rest of Americas                           | 160,636                | 86,228                    | 1,033                                             | 66 %        | 34 %        |
| Europe                                     | 290,591                | 92,719                    | 1,008                                             | 58 %        | 42 %        |
| Africa                                     | 27,917                 | 41,804                    | 506                                               | 37 %        | 63 %        |
| Southwest & Central Asia                   | 81,977                 | 40,680                    | 471                                               | 49 %        | 51 %        |
| Eastern Asia                               | 274,579                | 157,361                   | 2,645                                             | 62 %        | 38 %        |
| Southeast Asia & Oceania                   | 60,341                 | 29,775                    | 567                                               | 60 %        | 40 %        |
| <b>Total</b>                               | <b>1,335,840</b>       | <b>775,425</b>            | <b>10,670</b>                                     | <b>56 %</b> | <b>44 %</b> |
| <i>SW – Surface Water; GW– Groundwater</i> |                        |                           |                                                   |             |             |
| Region                                     | Value<br>(M\$)         | Tons<br>(kilotons)        | Virtual<br>Water<br>Import<br>(Mm <sup>3</sup> )  | % SW        | % GW        |
| Canada                                     | 294,227                | 293,707                   | 1,897                                             | —           | —           |
| Mexico                                     | 250,132                | 121,896                   | 912                                               | —           | —           |
| Rest of Americas                           | 155,880                | 213,653                   | 1,175                                             | —           | —           |
| Europe                                     | 411,859                | 174,366                   | 1,248                                             | —           | —           |
| Africa                                     | 59,898                 | 123,660                   | 227                                               | —           | —           |
| Southwest & Central Asia                   | 106,500                | 149,927                   | 361                                               | —           | —           |
| Eastern Asia                               | 680,927                | 130,236                   | 1,042                                             | —           | —           |
| Southeast Asia & Oceania                   | 73,213                 | 30,629                    | 400                                               | —           | —           |
| <b>Total</b>                               | <b>2,032,637</b>       | <b>1,238,074</b>          | <b>7,263</b>                                      | <b>—</b>    | <b>—</b>    |
| Region                                     | Value Balance<br>(M\$) | Ton Balance<br>(kilotons) | Virtual<br>Water<br>Balance<br>(Mm <sup>3</sup> ) | % SW        | % GW        |
| Canada                                     | 41,859                 | 125,795                   | -217                                              | —           | —           |
| Mexico                                     | 62,701                 | -37,050                   | -1,414                                            | —           | —           |
| Rest of Americas                           | -4,756                 | 127,425                   | 142                                               | —           | —           |
| Europe                                     | 121,268                | 81,647                    | 240                                               | —           | —           |
| Africa                                     | 31,981                 | 81,856                    | -279                                              | —           | —           |
| Southwest & Central Asia                   | 24,523                 | 109,247                   | -110                                              | —           | —           |
| Eastern Asia                               | 406,348                | -27,125                   | -1,603                                            | —           | —           |
| Southeast Asia & Oceania                   | 12,872                 | 854                       | -167                                              | —           | —           |
| <b>Total</b>                               | <b>696,797</b>         | <b>462,649</b>            | <b>-3,407</b>                                     | <b>—</b>    | <b>—</b>    |

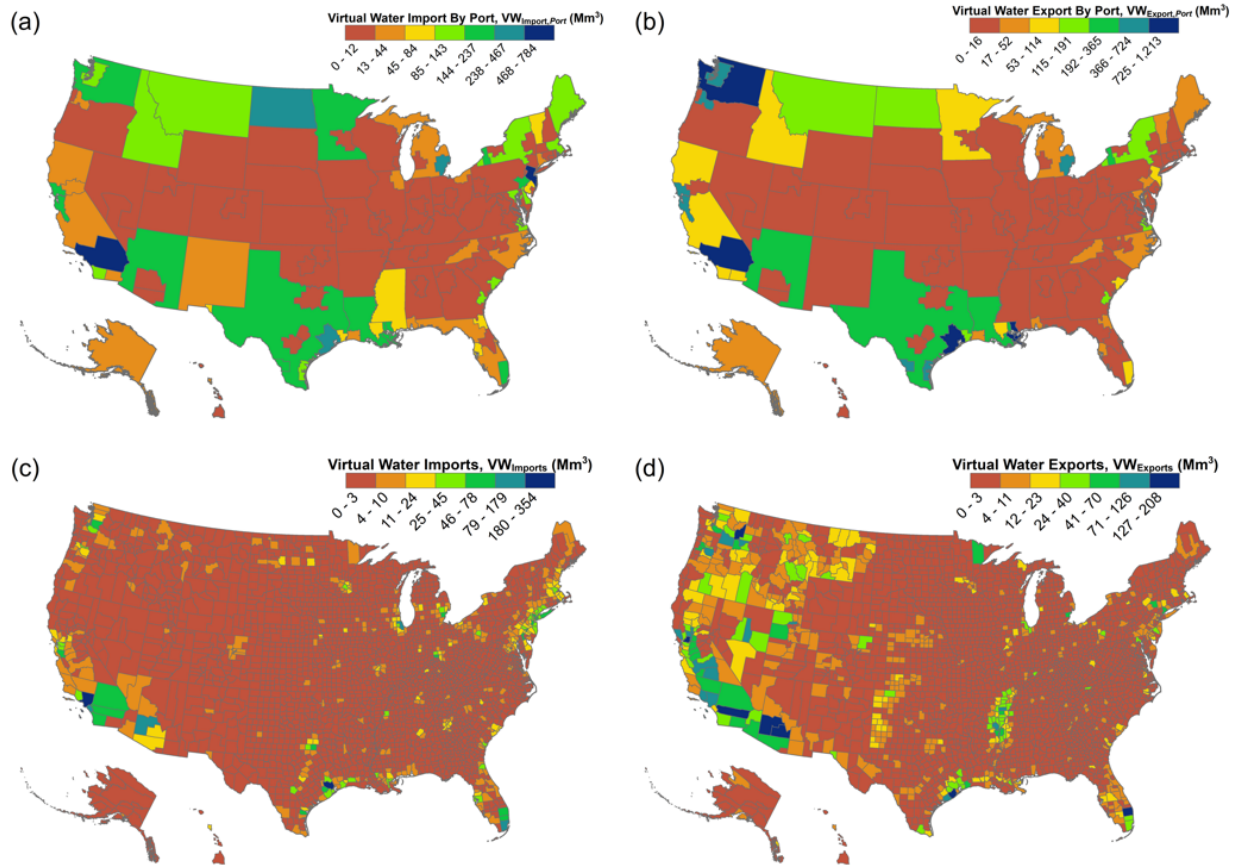

**Figure SI-3. (a) The ports through which the majority of U.S. virtual water imports ( $CU = I$ ) enter the U.S. market are primarily Los Angeles and New York and also Houston and Detroit (FAZ's used for port boundaries). However, land borders with Canada and Mexico are also import to U.S. virtual water import. (b) The ports through which the majority of U.S. virtual water exports ( $CU = I$ ) enter the global market are located in natural hazard prone areas along the West Coast, Texas Gulf Coast, and Eastern Seaboard. (c) Cities such as Los Angeles, Phoenix, Houston, New York City, Miami, Dallas, Seattle, and the San Francisco Bay area are the major destinations of U.S. virtual water imports ( $CU = I$ ). (d) U.S. virtual water exports ( $CU = I$ ) originate from California's Central Valley; Southern California and Southwest Arizona; the Columbia River Basin and the Pacific Northwest; Central Nevada and Northwest Utah; the Ogallala Aquifer region of the Midwest; the Texas Gulf Coast; the Mississippi Embayment; and South Florida. (d) The ports through which the majority of U.S. virtual water exports ( $CU = I$ ) enter the global market are located in natural hazard prone areas along the West Coast, Texas Gulf Coast, and Eastern Seaboard.**



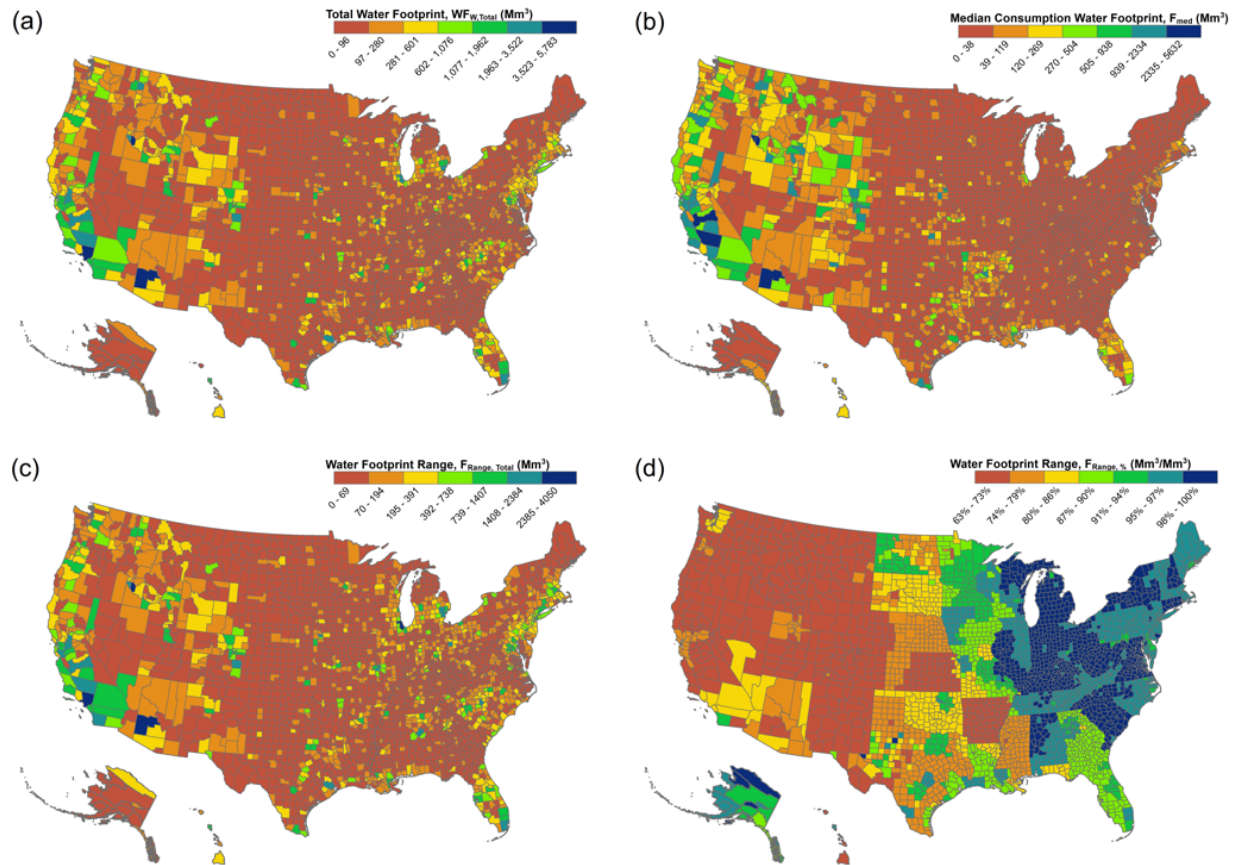

Figure SI-4. (a) The annual withdrawal-based ( $CU = 1$ ) water footprint,  $F_{Total}$  [Mm<sup>3</sup>], for U.S. Counties. (b) The annual consumption-based ( $CU_{med}$ ) water footprint,  $F_{Total,med}$  [Mm<sup>3</sup>], for U.S. Counties. The minimum scenario was constructed applying minimum sector-level consumption coefficients. (c) The annual average water footprint,  $F_{Average}$  [Mm<sup>3</sup>], for U.S. Counties.  $F_{Average}$  is taken as the average water footprint of the withdrawal-based ( $CU = 1$ ) and three consumption-based scenarios ( $CU_{max}$ ,  $CU_{med}$ ,  $CU_{min}$ ). (d) The range of uncertainty in water footprint,  $F_{Range}$  [Mm<sup>3</sup>], for U.S. Counties.  $F_{Range}$  is computed as the range between the highest and lowest water footprints of the withdrawal-based and three consumption-based scenarios. Absolute water footprint uncertainties are highest in the west, but relative uncertainties are highest in the east.

#### SI 1.4 Supplemental Data

Supplemental data is located in the included spreadsheet.
