# Supplementary material for: A spatially detailed blue water footprint of the United States economy
Source: Copernicus journal article supplement (doi:10.5194/hess-22-3007-2018), 2018-05-22
Supplement: Supplementary file 1 [file hess-2017-650-supplment-DataTable-version4.xlsx]

## Sheet: Sheet1
County Name	Federal Information Processing Standard (FIPS) County Code	Urban/Rural Classification	Population	Total Water Use				Virtual Water Outflows				Virtual Water Inflows				Virtual Water Balance				Water Footprint				Per Capita Water Footprint				Water Footprint Range	Relative Water Footprint Range
				Withdrawal	CUMax	CUMed	CUMin	Withdrawal	CUMax	CUMed	CUMin	Withdrawal	CUMax	CUMed	CUMin	Withdrawal	CUMax	CUMed	CUMin	Withdrawal	CUMax	CUMed	CUMin	Withdrawal	CUMax	CUMed	CUMin	(Withdrawal - CUMin)	(Withdrawal - CUMin)/Withdrawal
Autauga County, Alabama	1001	3	54571	69.2429	28.9621	10.9231	1.52399	64.3518	25.3916	10.2873	1.52399	42.9795	16.0032	9.56955	2.38052	-21.3722	-9.38842	-0.717724	0.856531	47.8707	19.5737	10.2054	2.38052	877.218	358.683	187.011	43.6224	45.4901	0.950272
Baldwin County, Alabama	1003	4	182265	91.2939	74.7174	58.7843	19.9871	72.4202	60.9396	56.3307	19.9871	127.845	53.316	20.7699	4.76102	55.4246	-7.62357	-35.5607	-15.2261	146.718	67.0938	23.2235	4.76102	804.973	368.111	127.416	26.1214	141.957	0.96755
Barbour County, Alabama	1005	6	27457	15.4732	11.0967	7.8332	1.49735	12.6407	9.02896	7.46498	1.49735	21.6248	8.05188	4.81485	1.19774	8.98414	-0.977079	-2.65013	-0.299607	24.4573	10.1196	5.18307	1.19774	890.75	368.562	188.77	43.6224	23.2596	0.951027
Bibb County, Alabama	1007	3	22915	10.693	6.94699	3.91349	0.562742	7.1974	4.13777	2.62964	0.21	48.2005	3.85188	2.41244	0.551055	41.0031	-0.285888	-0.217195	0.341055	51.6961	6.6611	3.69629	0.903797	2255.99	290.687	161.305	39.4413	50.7923	0.982517
Blount County, Alabama	1009	2	57322	80.1261	31.4692	9.99154	0.380386	74.779	27.5658	9.29642	0.380386	32.2308	9.63526	6.03513	1.37967	-42.5482	-17.9305	-3.26129	0.999284	37.5779	13.5386	6.73025	1.37967	655.558	236.186	117.411	24.0688	36.1982	0.963285
Bullock County, Alabama	1011	6	10914	4.47373	2.90946	1.42997	0.330844	2.73282	1.62782	1.20282	0.330844	8.59654	3.20087	1.91405	0.476138	5.86372	1.57305	0.711228	0.145294	10.3374	4.48251	2.1412	0.476138	947.173	410.712	196.188	43.6264	9.86131	0.95394
Butler County, Alabama	1013	6	20947	6.64808	4.28874	2.27075	0.297815	4.40977	2.65477	1.97977	0.297815	16.4968	6.1425	3.67308	0.913715	12.0871	3.48773	1.69331	0.6159	18.7352	7.77647	3.96406	0.913715	894.408	371.245	189.243	43.6203	17.8214	0.95123
Calhoun County, Alabama	1015	4	118572	43.6975	23.693	10.0531	2.14057	30.0051	13.6976	8.27308	2.14057	93.3861	34.7717	20.7927	5.1724	63.381	21.0742	12.5197	3.03182	107.078	44.7672	22.5727	5.1724	903.067	377.553	190.372	43.6224	101.906	0.951695
Chambers County, Alabama	1017	5	34215	8.42266	4.77065	1.43286	0.127244	4.41904	1.88878	0.915605	0.127244	26.9474	10.0337	5.99993	1.49254	22.5283	8.14491	5.08432	1.3653	30.951	12.9156	6.51718	1.49254	904.603	377.483	190.477	43.6224	29.4585	0.951777
Cherokee County, Alabama	1019	6	25989	10.9911	5.20238	2.80799	0.675729	8.6699	3.50609	2.50609	0.675729	20.4663	7.62051	4.55689	1.13357	11.7964	4.11441	2.0508	0.457843	22.7875	9.31679	4.85879	1.13357	876.814	358.49	186.956	43.6174	21.6539	0.950255
Chilton County, Alabama	1021	2	43643	17.8245	6.94313	2.92324	0.620214	13.0163	3.43312	2.29817	0.620214	24.5389	7.33578	4.59483	1.05041	11.5226	3.90266	2.29666	0.430195	29.3471	10.8458	5.2199	1.05041	672.436	248.511	119.605	24.0682	28.2967	0.964207
Choctaw County, Alabama	1023	6	13859	60.0931	21.6951	6.24107	0.0323366	58.67	20.645	6.02	0.017	32.2669	4.06357	2.42978	0.60417	-26.4031	-16.5814	-3.59022	0.58717	33.69	5.11364	2.65085	0.619507	2430.91	368.976	191.273	44.7007	33.0705	0.981612
Clarke County, Alabama	1025	6	25833	34.1323	13.1248	3.74948	0.0547854	32.0736	11.5959	3.3977	0.019	20.3513	7.57769	4.53129	1.1272	-11.7223	-4.01818	1.13359	1.1082	22.41	9.10667	4.88307	1.16299	867.496	352.521	189.024	45.0195	21.247	0.948104
Clay County, Alabama	1027	6	13932	4.15312	2.29626	0.91713	0.0736732	2.8129	1.3179	0.742901	0.0736732	10.9727	4.08562	2.44311	0.607747	8.1598	2.76772	1.70021	0.534074	12.3129	5.06398	2.61734	0.607747	883.787	363.478	187.865	43.6224	11.7052	0.950642
Cleburne County, Alabama	1029	6	14972	3.52396	2.36288	0.977144	0.122795	1.41	0.76	0.51	0.041	11.7918	4.3906	2.62548	0.653115	10.3818	3.6306	2.11548	0.612115	13.9058	5.99348	3.09263	0.73491	928.784	400.313	206.561	49.0856	13.1708	0.947151
Coffee County, Alabama	1031	5	49948	21.2281	14.3627	8.78131	2.08918	15.3007	10.0357	8.01075	2.08918	39.3385	14.6475	8.75886	2.17885	24.0378	4.61172	0.748113	0.0896747	45.2659	18.9745	9.52942	2.17885	906.261	379.884	190.787	43.6224	43.0871	0.951866
Colbert County, Alabama	1033	4	54428	355.617	44.4313	14.6704	1.18706	350.726	40.8608	14.0346	1.18706	126.73	15.9599	9.5431	2.37291	-223.996	-24.9009	-4.49146	1.18585	131.621	19.5304	10.1789	2.37291	2418.26	358.83	187.017	43.5972	129.248	0.981972
Conecuh County, Alabama	1035	6	13228	3.73969	2.07625	0.888045	0.0870098	2.63435	1.26935	0.744351	0.0870098	10.4182	3.87917	2.31966	0.577037	7.78388	2.60982	1.57531	0.490027	11.5236	4.68607	2.46335	0.577037	871.15	354.254	186.222	43.6224	10.9465	0.949926
Coosa County, Alabama	1037	5	11539	7.57019	1.349	0.342328	0.0285879	6.13325	0.288846	0.119465	0.0132514	9.09193	3.38533	2.02435	0.503577	2.95868	3.09648	1.90489	0.490326	10.5289	4.44548	2.24721	0.518914	912.459	385.257	194.75	44.9704	10.01	0.950715
Covington County, Alabama	1039	6	37765	62.7638	8.3431	4.7623	1.15147	59.3787	5.87197	4.32223	1.15147	29.7433	11.0747	6.62246	1.6474	-29.6354	5.20277	2.30022	0.49593	33.1284	13.5459	7.06252	1.6474	877.225	358.689	187.012	43.6224	31.481	0.950272
Crenshaw County, Alabama	1041	6	13906	4.59129	2.89801	1.64348	0.220805	3.03	1.665	1.14	0.093	10.9522	4.07799	2.43855	0.606613	7.92222	2.41299	1.29855	0.513613	12.5135	5.311	2.94203	0.734418	899.864	381.922	211.566	52.813	11.7791	0.94131
Cullman County, Alabama	1043	5	80406	52.6677	25.6543	10.8769	1.43324	43.8802	19.2394	9.73457	1.43324	169.1	13.5134	8.46349	1.93325	125.22	-5.72601	-1.27108	0.500005	177.888	19.9282	9.60586	1.93325	2212.37	247.845	119.467	24.0436	175.954	0.989132
Dale County, Alabama	1045	5	50251	15.0815	9.68716	4.94064	1.16923	9.84496	5.86448	4.25989	1.16923	39.5772	14.7363	8.812	2.19207	29.7322	8.87184	4.5521	1.02283	44.8137	18.559	9.49275	2.19207	891.797	369.326	188.907	43.6224	42.6216	0.951085
Dallas County, Alabama	1047	5	43820	68.7642	35.0983	19.3093	2.26515	63.7625	31.4471	18.6591	2.26515	34.5122	12.8504	7.68426	1.91153	-29.2503	-18.5967	-10.9748	-0.353619	39.5138	16.5016	8.33447	1.91153	901.731	376.577	190.198	43.6224	37.6023	0.951624
DeKalb County, Alabama	1049	6	71109	18.3591	11.2899	5.31875	0.581508	9.13955	3.7902	1.64072	0.296508	165.577	20.8521	12.4684	3.10029	156.437	17.0619	10.8277	2.80378	174.796	28.3519	16.1464	3.38529	2458.14	398.71	227.066	47.607	171.411	0.980633
Elmore County, Alabama	1051	3	79303	40.7633	12.8113	4.75938	0.847272	33.1226	7.23366	3.7661	0.847272	62.4527	23.2539	13.9053	3.45908	29.3301	16.0202	10.1392	2.61181	70.0934	28.8316	14.8986	3.45908	883.868	363.562	187.869	43.6185	66.6343	0.95065
Escambia County, Alabama	1053	6	38319	63.3155	27.2212	10.4673	1.56688	58.604	23.7818	9.85484	1.56688	30.1796	11.2372	6.7196	1.67157	-28.4243	-12.5446	-3.13524	0.104683	34.8912	14.6767	7.33211	1.67157	910.546	383.013	191.344	43.6224	33.2196	0.952092
Etowah County, Alabama	1055	4	104430	50.3466	21.386	6.5326	0.450313	38.7129	12.8934	5.02022	0.450313	82.248	30.6245	18.3128	4.55549	43.5351	17.7311	13.2926	4.10517	93.8816	39.1171	19.8252	4.55549	898.991	374.577	189.842	43.6224	89.3262	0.951476
Fayette County, Alabama	1057	6	17241	7.14007	3.94443	1.26486	0.114907	5.3853	2.66344	1.03674	0.114907	40.1438	5.05556	3.02294	0.75166	34.7585	2.39212	1.9862	0.636752	41.8986	6.33655	3.25106	0.75166	2430.17	367.528	188.566	43.5972	41.1469	0.98206
Franklin County, Alabama	1059	6	31704	9.61594	5.72722	2.2064	0.180683	6.16179	3.14974	1.57705	0.104	73.831	9.298	5.55968	1.38242	67.6692	6.14826	3.98263	1.27842	77.2851	11.8755	6.18903	1.45911	2437.71	374.574	195.213	46.0228	75.826	0.98112
Geneva County, Alabama	1061	4	26790	11.3759	9.12136	6.92138	1.99906	8.87511	7.29576	6.59628	1.99906	21.0995	7.85628	4.69788	1.16864	12.2244	0.560521	-1.89839	-0.830421	23.6003	9.68188	5.02299	1.16864	880.939	361.399	187.495	43.6224	22.4317	0.950482
Greene County, Alabama	1063	6	9045	156.285	15.5668	14.3718	1.46622	154.669	14.3867	14.1617	1.46622	21.0603	2.65226	1.5859	0.394337	-133.609	-11.7344	-12.5758	-1.07189	22.6769	3.83235	1.79605	0.394337	2507.12	423.698	198.569	43.5972	22.2825	0.982611
Hale County, Alabama	1065	4	15760	28.3085	26.9094	25.5296	2.55001	26.8163	25.8201	25.3356	2.55001	36.6955	4.62129	2.76327	0.687092	9.87911	-21.1988	-22.5724	-1.86292	38.1877	5.7106	2.95726	0.687092	2423.07	362.348	187.643	43.5972	37.5006	0.982007
Henry County, Alabama	1067	4	17302	9.32929	7.46067	5.81651	1.87939	7.46403	6.09903	5.57403	1.87939	13.6269	5.07389	3.03407	0.754755	6.16284	-1.02515	-2.53996	-1.12464	15.4921	6.43553	3.27656	0.754755	895.396	371.953	189.374	43.6224	14.7374	0.951281
Houston County, Alabama	1069	4	101547	351.28	27.959	17.7395	5.53474	341.539	20.8482	16.4732	5.53474	79.9774	29.7791	17.8072	4.42972	-261.562	8.93086	1.33401	-1.10502	89.7182	36.8899	19.0735	4.42972	883.514	363.279	187.83	43.6224	85.2884	0.950626
Jackson County, Alabama	1071	5	53227	352.789	15.1079	5.78315	0.717128	346.488	10.0833	3.59374	0.134337	123.931	15.6074	9.33235	2.32051	-222.558	5.52414	5.73861	2.18617	130.231	20.632	11.5218	2.9033	2446.72	387.623	216.464	54.5456	127.328	0.977707
Jefferson County, Alabama	1073	1	658466	1313.06	73.2445	17.6146	1.47719	1234.66	16.0153	7.42307	1.47719	1384.81	110.665	69.3098	15.8319	150.146	94.6497	61.8867	14.3547	1463.2	167.894	79.5013	15.8319	2222.14	254.978	120.737	24.0436	1447.37	0.98918
Lamar County, Alabama	1075	6	14564	3.21442	1.6959	0.59086	0.0600098	2.16435	0.929351	0.454351	0.0600098	33.9107	4.27059	2.55357	0.63495	31.7463	3.34124	2.09922	0.57494	34.9608	5.03714	2.69008	0.63495	2400.49	345.863	184.708	43.5972	34.3258	0.981838
Lauderdale County, Alabama	1077	4	92709	160.28	16.7259	8.19922	2.01368	150.194	9.36301	6.88801	2.01368	215.863	27.185	16.2551	4.04186	65.6694	17.822	9.36707	2.02817	225.949	34.5479	17.5663	4.04186	2437.19	372.649	189.478	43.5972	221.907	0.982112
Lawrence County, Alabama	1079	4	34339	169.941	41.4732	16.0206	2.09024	159.565	32.4547	10.0198	0.111819	79.9546	10.0692	6.02081	1.49709	-79.6101	-22.3855	-3.99894	1.38527	90.331	19.0877	12.0217	3.47551	2630.57	555.86	350.089	101.212	86.8555	0.961525
Lee County, Alabama	1081	4	140247	31.903	17.1835	4.6936	0.574226	14.1761	4.24292	2.38911	0.574226	110.46	41.1292	24.5944	6.11808	96.2841	36.8863	22.2053	5.54386	128.187	54.0698	26.8989	6.11808	914.009	385.533	191.796	43.6236	122.069	0.952272
Limestone County, Alabama	1083	3	82782	1817.18	20.3311	13.5836	4.18553	1810.13	15.1872	12.6675	4.18553	192.749	24.2741	14.5145	3.60907	-1617.39	9.08692	1.847	-0.576463	199.795	29.4181	15.4306	3.60907	2413.51	355.368	186.4	43.5972	196.186	0.981936
Lowndes County, Alabama	1085	3	11299	20.2284	5.52984	4.18468	1.22306	18.9158	4.57165	4.01404	1.22306	8.89897	3.31348	1.98139	0.492889	-10.0168	-1.25817	-2.03265	-0.730167	10.2116	4.27167	2.15202	0.492889	903.758	378.057	190.462	43.6224	9.71867	0.951732
Macon County, Alabama	1087	6	21452	10.1083	6.77139	3.91429	1.11412	8.04961	5.26855	3.64666	1.11412	16.8938	6.2903	3.76146	0.9357	8.84419	1.02176	0.114801	-0.178422	18.9525	7.79315	4.02909	0.9357	883.484	363.283	187.819	43.6183	18.0168	0.950629
Madison County, Alabama	1089	3	334811	110.406	62.5284	23.1273	4.33936	68.9416	32.2596	17.7369	4.33936	779.571	98.1763	58.7039	14.5968	710.63	65.9167	40.967	10.2575	821.035	128.445	64.0942	14.5968	2452.24	383.635	191.434	43.5972	806.438	0.982221
Marengo County, Alabama	1091	6	21027	35.3712	15.9936	7.43538	0.481683	33.3816	14.4852	6.99643	0.405	48.9638	6.16631	3.68711	0.916806	15.5821	-8.31887	-3.30932	0.511806	50.9534	7.67468	4.12606	0.993489	2423.23	364.992	196.227	47.2483	49.9599	0.980502
Marion County, Alabama	1093	6	30776	10.7238	5.59726	1.91799	0.145907	7.21435	2.97194	1.25741	0.059	71.6609	9.02471	5.39627	1.34179	64.4466	6.05277	4.13886	1.28279	75.1704	11.65	6.05685	1.4287	2442.5	378.543	196.804	46.4225	73.7417	0.980994
Marshall County, Alabama	1095	5	93019	84.2147	21.5612	8.39619	1.13392	74.4048	14.4	7.1209	1.13392	216.585	27.2759	16.3094	4.05537	142.18	12.8759	9.18853	2.92145	226.395	34.4371	17.5847	4.05537	2433.85	370.216	189.044	43.5972	222.339	0.982087
Mobile County, Alabama	1097	3	412992	393.446	79.5216	30.3867	5.76472	351.029	48.5569	24.8725	5.76472	289.682	120.808	47.0624	10.7879	-61.3469	72.2512	22.1899	5.02321	332.099	151.773	52.5766	10.7879	804.13	367.496	127.307	26.1214	321.311	0.967516
Monroe County, Alabama	1099	6	23068	70.5467	26.5773	8.12845	0.314171	68.0044	24.7214	7.79795	0.314171	18.1697	6.76538	4.04555	1.00637	-49.8347	-17.956	-3.7524	0.692198	20.712	8.62127	4.37605	1.00637	897.867	373.733	189.702	43.6262	19.7056	0.951411
Montgomery County, Alabama	1101	3	229363	52.4263	29.4346	8.94228	0.888718	31.6183	14.2448	6.23724	0.888718	180.644	67.2617	40.221	10.0054	149.026	53.0169	33.9838	9.11665	201.452	82.4515	42.926	10.0054	878.31	359.481	187.153	43.6224	191.447	0.950334
Morgan County, Alabama	1103	4	119490	162.367	63.3541	18.8147	0.634781	149.931	54.2596	17.1967	0.634781	278.22	35.0379	20.9507	5.20943	128.289	-19.2217	3.75398	4.57465	290.655	44.1324	22.5686	5.20943	2432.47	369.34	188.875	43.5972	285.446	0.982077
Perry County, Alabama	1105	6	10591	15.3668	13.7145	12.5512	1.24267	14.3029	12.9379	12.4129	1.24267	24.6367	3.10266	1.85521	0.461302	10.3338	-9.83524	-10.5577	-0.781371	25.7006	3.8793	1.99352	0.461302	2426.65	366.282	188.228	43.5561	25.2393	0.982051
Pickens County, Alabama	1107	4	19746	9.07861	6.92489	4.76662	0.94582	6.39816	4.96816	4.41816	0.94582	45.9764	5.7901	3.46215	0.860871	39.5783	0.82194	-0.956009	-0.0849491	48.6569	7.74683	3.81061	0.860871	2464.14	392.324	192.981	43.5972	47.796	0.982307
Pike County, Alabama	1109	5	32899	11.2077	7.60949	4.27183	1.03087	7.26992	4.73492	3.75992	1.03087	25.9109	9.64777	5.76916	1.43513	18.641	4.91286	2.00924	0.404264	29.8487	12.5223	6.28107	1.43513	907.282	380.63	190.92	43.6224	28.4135	0.95192
Randolph County, Alabama	1111	6	22913	6.28171	3.07974	1.22183	0.111565	4.02958	1.39839	0.808853	0.0604431	18.0468	6.71963	4.01819	0.999564	14.0172	5.32124	3.20934	0.939121	20.2989	8.40098	4.43117	1.05069	885.914	366.647	193.391	45.8554	19.2483	0.948239
Russell County, Alabama	1113	3	52947	56.5504	23.9726	8.94135	1.25115	52.585	21.0778	8.42585	1.25115	41.7021	15.5275	9.28512	2.30976	-10.883	-5.55031	0.859269	1.05861	45.6675	18.4223	9.80062	2.30976	862.513	347.938	185.102	43.624	43.3577	0.949422
St. Clair County, Alabama	1115	2	83593	25.7403	15.0059	5.97649	1.12856	16.4443	8.07135	4.28951	1.07356	47.0052	14.052	8.80158	2.0121	30.5609	5.98064	4.51207	0.938539	56.3012	20.9866	10.4886	2.0671	673.516	251.057	125.472	24.7282	54.2341	0.963285
Shelby County, Alabama	1117	2	195085	565.018	22.8465	8.04064	1.72587	546.918	9.63357	5.68765	1.72587	410.269	32.7861	20.534	4.69042	-136.649	23.1525	14.8464	2.96455	428.369	45.999	22.887	4.69042	2195.81	235.79	117.318	24.043	423.678	0.98905
Sumter County, Alabama	1119	6	13763	12.0951	8.80296	5.74027	0.573468	10.5891	7.70356	5.54448	0.573468	32.0457	4.03571	2.41313	0.600029	21.4566	-3.66785	-3.13136	0.0265603	33.5517	5.13511	2.60891	0.600029	2437.82	373.11	189.56	43.5972	32.9517	0.982116
Talladega County, Alabama	1121	5	82291	69.2168	27.7764	9.17407	0.900282	61.9492	22.4711	8.22928	0.900282	64.8115	24.1322	14.4305	3.58973	2.8623	1.66113	6.20124	2.68945	72.0791	29.4375	15.3753	3.58973	875.905	357.725	186.841	43.6224	68.4894	0.950197
Tallapoosa County, Alabama	1123	6	41616	17.2653	8.77879	3.41703	0.308039	13.0374	5.6924	2.8674	0.308039	32.7779	12.2047	7.29812	1.81548	19.7405	6.51225	4.43071	1.50744	37.0058	15.291	7.84775	1.81548	889.221	367.432	188.575	43.6245	35.1903	0.950941
Tuscaloosa County, Alabama	1125	4	194656	74.9812	31.1693	10.8759	1.83472	56.301	17.5327	8.44745	1.83472	453.228	57.0779	34.1294	8.48633	396.927	39.5452	25.6819	6.65161	471.909	70.7145	36.5578	8.48633	2424.32	363.279	187.807	43.5966	463.422	0.982017
Walker County, Alabama	1127	2	67023	276.541	22.0954	7.15744	0.584725	271.373	18.3231	6.48567	0.584725	140.955	11.2642	7.0548	1.61147	-130.419	-7.05891	0.569137	1.02675	146.122	15.0365	7.72657	1.61147	2180.18	224.348	115.282	24.0436	144.511	0.988972
Washington County, Alabama	1129	6	17581	82.2935	8.23231	2.56202	0.154304	80.4421	6.88075	2.32133	0.154304	13.8505	5.15717	3.08387	0.767144	-66.5915	-1.72358	0.762545	0.61284	15.702	6.50874	3.32456	0.767144	893.124	370.214	189.1	43.6348	14.9349	0.951144
Wilcox County, Alabama	1131	6	11670	49.7705	11.8645	4.01739	0.125908	48.8586	11.1988	3.89884	0.125908	27.1607	3.42052	2.04528	0.508562	-21.6979	-7.77832	-1.85356	0.382654	28.0726	4.08621	2.16382	0.508562	2405.54	350.146	185.418	43.5786	27.564	0.981884
Winston County, Alabama	1133	6	24484	3.94625	2.83363	1.01568	0.0857854	1.24932	0.838413	0.580904	0.05	57.006	7.17913	4.29271	1.06739	55.7567	6.34071	3.71181	1.01739	59.703	9.17435	4.72748	1.10318	2438.45	374.708	193.085	45.057	58.5998	0.981522
Aleutians East Borough, Alaska	2013	6	3141	5.16252	1.90664	0.524127	0	4.9	1.715	0.49	0	0.940989	0.66858	0.466455	0.0627521	-3.95901	-1.04642	-0.0235453	0.0627521	1.20351	0.860218	0.500582	0.0627521	383.161	273.868	159.37	19.9784	1.14076	0.947859
Aleutians West Census Area, Alaska	2016	6	5561	6.8803	2.62862	0.705439	0	6.3	2.205	0.63	0	1.66598	1.18369	0.825837	0.1111	-4.63402	-1.02131	0.195837	0.1111	2.24628	1.60731	0.901277	0.1111	403.935	289.033	162.071	19.9784	2.13518	0.950541
Anchorage Municipality, Alaska	2020	3	291826	69.425	42.8379	11.4827	1.0558	25.1424	10.3139	5.08885	0.784853	89.2084	62.6557	43.8765	6.36906	64.066	52.3418	38.7877	5.58421	133.491	95.1798	50.2704	6.64001	457.434	326.152	172.261	22.7533	126.851	0.950259
Bethel Census Area, Alaska	2050	6	17013	0.707937	0.48059	0.08917	0	0.1	0.035	0.01	0	5.0968	3.62132	2.52652	0.339892	4.9968	3.58632	2.51652	0.339892	5.70474	4.06691	2.60569	0.339892	335.316	239.047	153.159	19.9784	5.36484	0.940419
Bristol Bay Borough, Alaska	2060	6	997	0.296717	0.140604	0.0325732	0	0.2	0.07	0.02	0	0.298684	0.212217	0.14806	0.0199184	0.098684	0.142217	0.12806	0.0199184	0.395401	0.282821	0.160633	0.0199184	396.591	283.672	161.116	19.9784	0.375483	0.949625
Denali Borough, Alaska	2068	6	1826	33.5907	1.33803	1.08078	0.866566	33.0839	0.899005	0.849005	0.829005	33.4309	1.21768	1.10018	0.865485	0.347038	0.318675	0.25117	0.0364805	33.9378	1.65671	1.33195	0.903046	18585.9	907.288	729.437	494.549	33.0347	0.973391
Dillingham Census Area, Alaska	2070	6	4847	0.742136	0.427759	0.0874777	0	0.3	0.105	0.03	0	1.45208	1.03171	0.719804	0.0968352	1.15208	0.926712	0.689804	0.0968352	1.89421	1.35447	0.777282	0.0968352	390.801	279.445	160.364	19.9784	1.79738	0.948878
Fairbanks North Star Borough, Alaska	2090	4	97581	77.6533	24.7891	5.5604	1.08142	64.9971	15.4755	3.67469	0.979172	73.9998	21.7379	15.4585	2.91668	9.0027	6.26233	11.7838	1.93751	86.656	31.0514	17.3442	3.01893	888.041	318.212	177.741	30.9376	83.637	0.965162
Haines Borough, Alaska	2100	6	2508	61.3311	61.08	60.869	6.081	0.3	0.105	0.03	0	0.751353	0.533842	0.372451	0.0501058	0.451353	0.428842	0.342451	0.0501058	61.7824	61.5088	61.2115	6.13111	24634.1	24525	24406.5	2444.62	55.6513	0.900763
Hoonah-Angoon Census Area, Alaska	2105	6	2150	194.918	194.456	194.102	19.4	0.6	0.21	0.06	0	0.644103	0.45764	0.319286	0.0429535	0.0441027	0.24764	0.259286	0.0429535	194.962	194.704	194.362	19.443	90679.9	90560	90400.8	9043.23	175.519	0.900273
Juneau City and Borough, Alaska	2110	5	31275	81.5309	77.6401	72.3369	7.106	75.8246	73.4745	71.595	7.106	9.36945	6.65706	4.6445	0.624824	-66.4551	-66.8175	-66.9505	-6.48118	15.0758	10.8227	5.38632	0.624824	482.04	346.049	172.225	19.9784	14.451	0.958554
Kenai Peninsula Borough, Alaska	2122	6	55400	41.3825	37.3558	31.3798	3.60521	33.8938	31.8405	30.25	3.53875	17.2186	12.414	8.84894	1.72856	-16.6752	-19.4266	-21.4011	-1.8102	24.7073	17.9292	9.97873	1.79501	445.98	323.632	180.122	32.401	22.9123	0.927349
Ketchikan Gateway Borough, Alaska	2130	5	13477	41.7059	36.0494	33.2682	3.229	8.21382	2.88188	0.821934	0	4.03748	2.86866	2.0014	0.269249	-4.17634	-0.0132246	1.17947	0.269249	37.5295	36.0362	34.4477	3.49825	2784.71	2673.9	2556.03	259.572	34.0313	0.906787
Kodiak Island Borough, Alaska	2150	6	13592	8.79312	3.68364	0.986526	0.007	0	0	0	0	4.07193	2.89314	2.01848	0.271546	4.07193	2.89314	2.01848	0.271546	12.8651	6.57677	3.00501	0.278546	946.517	483.871	221.087	20.4934	12.5865	0.978349
Lake and Peninsula Borough, Alaska	2164	6	1631	0.661984	0.297745	0.0798961	0.001	0.5	0.175	0.05	0	0.488619	0.347168	0.242212	0.0325847	-0.0113807	0.172168	0.192212	0.0325847	0.650604	0.469912	0.272108	0.0335847	398.899	288.113	166.835	20.5915	0.617019	0.948379
Matanuska-Susitna Borough, Alaska	2170	3	88995	52.4951	45.8936	38.061	3.80795	8.76595	4.22371	0.967233	0	26.6614	18.9431	13.2162	1.77798	17.8954	14.7194	12.249	1.77798	70.3905	60.613	50.31	5.58592	790.949	681.083	565.313	62.7667	64.8046	0.920644
Nome Census Area, Alaska	2180	6	9492	1.02572	0.72335	0.131311	0	0.1	0.035	0.01	0	2.84364	2.02043	1.40961	0.189635	2.74364	1.98543	1.39961	0.189635	3.76936	2.70878	1.53092	0.189635	397.109	285.375	161.285	19.9784	3.57973	0.94969
North Slope Borough, Alaska	2185	6	9430	305.578	262.63	42.7679	0	113.119	97.1801	15.8286	0	2.82506	2.00723	1.4004	0.188396	-110.294	-95.1728	-14.4282	0.188396	195.284	167.457	28.3397	0.188396	20708.8	17757.9	3005.27	19.9784	195.096	0.999035
Northwest Arctic Borough, Alaska	2188	6	7523	13.6128	11.5608	1.89447	0	8.14698	6.9554	1.13658	0	2.25376	1.60131	1.1172	0.150297	-5.89322	-5.35409	-0.0193729	0.150297	7.71956	6.20671	1.87509	0.150297	1026.13	825.031	249.248	19.9784	7.56927	0.98053
Petersburg Census Area, Alaska	2195	6	3815	86.1831	85.3041	84.7786	8.461	1.2	0.42	0.12	0	1.14411	0.812896	0.567141	0.0762974	-0.0558938	0.392896	0.447141	0.0762974	86.1272	85.697	85.2258	8.5373	22575.9	22463.2	22339.7	2237.82	77.5899	0.900876
Prince of Wales-Hyder Census Area, Alaska	2198	6	5559	101.858	101.636	101.24	10.115	0.1	0.035	0.01	0	1.66538	1.18327	0.82554	0.11106	1.56538	1.14827	0.81554	0.11106	103.423	102.784	102.055	10.2261	18604.7	18489.7	18358.5	1839.55	93.1973	0.901124
Sitka City and Borough, Alaska	2220	6	8881	76.3695	75.4677	74.6523	7.443	1	0.35	0.1	0	2.66059	1.89037	1.31887	0.177428	1.66059	1.54037	1.21887	0.177428	78.0301	77.008	75.8712	7.62043	8786.19	8671.1	8543.09	858.06	70.4097	0.90234
Skagway Municipality, Alaska	2230	6	968	11.9844	11.8262	11.6966	1.166	0.2	0.07	0.02	0	0.289996	0.206044	0.143753	0.0193391	0.089996	0.136044	0.123753	0.0193391	12.0743	11.9622	11.8203	1.18534	12473.5	12357.7	12211.1	1224.52	10.889	0.90183
Southeast Fairbanks Census Area, Alaska	2240	6	7029	1.79954	1.30086	0.772966	0.181767	0.569084	0.244084	0.119084	0.0690837	2.17485	1.56525	1.11293	0.209512	1.60577	1.32116	0.993843	0.140428	3.40531	2.62203	1.76681	0.322195	484.465	373.03	251.36	45.8379	3.08311	0.905384
Valdez-Cordova Census Area, Alaska	2261	6	9636	59.2795	55.7198	53.8728	5.324	5.1	1.785	0.51	0	2.88678	2.05108	1.431	0.192512	-2.21322	0.266078	0.920996	0.192512	57.0663	55.9859	54.7938	5.51651	5922.2	5810.08	5686.37	572.49	51.5498	0.903332
Kusilvak Census Area, Alaska (formerly Wade Hampton Census Area, AK)	2270	6	7459	0.69412	0.4723	0.0875119	0	0.1	0.035	0.01	0	2.23459	1.58769	1.1077	0.149019	2.13459	1.55269	1.0977	0.149019	2.82871	2.02499	1.18521	0.149019	379.234	271.483	158.897	19.9784	2.67969	0.947319
Wrangell City and Borough, Alaska	2275	6	2369	66.3963	65.9353	65.6162	6.552	0	0	0	0	0.708513	0.503404	0.351215	0.0472489	0.708513	0.503404	0.351215	0.0472489	67.1048	66.4387	65.9674	6.59925	28326.2	28045	27846.1	2785.67	60.5056	0.901658
Yakutat City and Borough, Alaska	2282	6	662	127.941	127.459	127.215	12.713	0.7	0.245	0.07	0	0.198324	0.140911	0.0983104	0.0132257	-0.501676	-0.104089	0.0283104	0.0132257	127.439	127.355	127.243	12.7262	192506	192379	192210	19223.9	114.713	0.900139
Yukon-Koyukuk Census Area, Alaska	2290	6	5588	2.52137	2.30646	1.73929	0.162	0.362053	0.260365	0.0466874	0	1.67407	1.18944	0.829847	0.111639	1.31202	0.929073	0.783159	0.111639	3.83339	3.23553	2.52245	0.273639	686.003	579.014	451.405	48.9691	3.55975	0.928617
Apache County, Arizona	4001	6	71518	32.3172	27.3204	21.1306	4.83651	13.2501	10.5662	9.51624	0.951241	89.6938	40.1209	37.385	13.8024	76.4437	29.5547	27.8688	12.8511	108.761	56.8751	48.9994	17.6876	1520.75	795.256	685.134	247.317	91.0733	0.837371
Cochise County, Arizona	4003	4	131346	333.299	315.545	301.194	109.882	313.389	301.011	298.606	109.882	88.341	73.4765	68.4519	25.1413	-225.048	-227.534	-230.154	-84.7403	108.251	88.0108	71.0402	25.1413	824.166	670.068	540.863	191.413	83.1096	0.76775
Coconino County, Arizona	4005	4	134421	111.299	31.8808	15.0296	1.398	86.8439	13.9237	11.5138	1.25486	90.4085	75.1961	70.054	25.7297	3.56464	61.2724	58.5402	24.4749	114.864	93.1532	73.5698	25.8729	854.51	692.996	547.309	192.476	88.9913	0.774752
Gila County, Arizona	4007	5	53597	49.3361	41.3891	15.7229	2.03262	40.6453	35.0448	14.5931	2.03262	36.0484	29.9828	27.9325	10.2592	-4.59694	-5.06205	13.3394	8.22653	44.7391	36.327	29.0623	10.2592	834.732	677.781	542.237	191.413	34.48	0.770689
Graham County, Arizona	4009	5	37220	244.933	240.802	233.946	85.3728	238.453	236.072	233.103	85.3728	25.0335	20.8213	19.3975	7.12439	-213.419	-215.25	-213.706	-78.2484	31.5136	25.5518	20.2399	7.12439	846.684	686.506	543.791	191.413	24.3892	0.773926
Greenlee County, Arizona	4011	6	8437	36.0997	34.3657	29.3196	8.33361	33.5436	32.4998	28.9873	8.3336	5.67458	4.71976	4.39701	1.61495	-27.869	-27.78	-24.5903	-6.71865	8.23067	6.58571	4.7293	1.61495	975.545	780.575	560.543	191.413	6.61572	0.803789
La Paz County, Arizona	4012	6	20489	925.64	922.692	918.967	339.642	920.054	918.568	918.093	339.625	13.7805	11.4618	10.678	3.92186	-906.273	-907.106	-907.415	-335.703	19.3667	15.5856	11.5521	3.93886	945.225	760.681	563.82	192.242	15.4279	0.796617
Maricopa County, Arizona	4013	1	3817354	2813.91	2253.14	1663.58	560.628	1962.06	1631.28	1552.84	560.628	4825.22	4396.29	4280.95	1626.69	2863.16	2765.01	2728.11	1066.06	5677.08	5018.15	4391.69	1626.69	1487.18	1314.56	1150.45	426.13	4050.39	0.713464
Mohave County, Arizona	4015	4	200209	171.829	143.71	110.218	37.6717	121.025	106.623	103.613	37.6717	137.87	112.205	104.547	38.5372	16.8449	5.58215	0.934107	0.865444	188.674	149.292	111.152	38.5372	942.384	745.683	555.18	192.485	150.137	0.795747
Navajo County, Arizona	4017	5	107449	91.4644	50.2279	34.4302	9.0752	51.7136	15.2372	10.0177	0.890575	72.2683	60.1082	55.9978	20.5671	20.5547	44.871	45.9802	19.6765	112.019	95.0989	80.4104	28.7518	1042.53	885.061	748.359	267.585	83.2673	0.743332
Pima County, Arizona	4019	3	980263	422.778	324.649	174.924	51.7315	256.286	203.11	153.28	51.7315	276.036	213.544	183.939	76.6995	19.7503	10.4343	30.6584	24.968	442.528	335.083	205.583	76.6995	451.438	341.83	209.722	78.2438	365.829	0.826679
Pinal County, Arizona	4021	2	375826	1565.81	1526.29	1480.55	539.826	1504.12	1481.26	1472.53	539.826	475.011	432.786	421.431	160.137	-1029.11	-1048.47	-1051.1	-379.689	536.703	477.821	429.451	160.137	1428.06	1271.39	1142.69	426.092	376.566	0.701629
Santa Cruz County, Arizona	4023	5	47420	25.2268	21.1647	15.8814	5.34242	17.9868	15.8795	14.9402	5.34242	30.3732	26.5329	24.7188	9.08235	12.3864	10.6533	9.7786	3.73993	37.6132	31.818	25.66	9.08235	793.193	670.984	541.123	191.53	28.5308	0.758533
Yavapai County, Arizona	4025	4	211033	131.258	113.006	73.6188	17.5998	100.46	90.5237	69.6152	17.5998	141.937	118.054	109.981	40.3944	41.4768	27.5307	40.3663	22.7946	172.735	140.537	113.985	40.3944	818.519	665.946	540.129	191.413	132.34	0.766147
Yuma County, Arizona	4027	4	195751	1606.79	1586.41	1561.33	574.052	1571.34	1560.53	1556.72	574.052	131.658	109.505	102.017	37.4691	-1439.68	-1451.02	-1454.7	-536.583	167.112	135.386	106.626	37.4691	853.695	691.624	544.7	191.412	129.643	0.775784
Arkansas County, Arkansas	5001	6	19019	1298.36	1295.05	1292.47	477.69	1295.73	1293.13	1292.13	477.69	63.3093	58.9621	57.3458	20.3233	-1232.42	-1234.17	-1234.79	-457.367	65.9345	60.8785	57.6871	20.3233	3466.77	3200.93	3033.13	1068.58	45.6111	0.691765
Ashley County, Arkansas	5003	6	21853	283.481	228.389	205.698	69.5576	280.455	226.18	205.305	69.5576	72.7467	67.7516	65.8943	23.3529	-207.708	-158.428	-139.41	-46.2047	75.7726	69.9605	66.2877	23.3529	3467.38	3201.41	3033.34	1068.64	52.4197	0.691803
Baxter County, Arkansas	5005	5	41513	7.90182	5.12609	1.36034	0.0480875	2.29222	1.03109	0.631088	0.0480875	138.193	128.704	125.176	44.3623	135.901	127.673	124.545	44.3142	143.803	132.799	125.905	44.3623	3464.04	3198.98	3032.91	1068.64	99.4405	0.691506
Benton County, Arkansas	5007	3	221339	202.003	47.3056	13.7649	0.512043	171.427	24.9848	9.78991	0.512043	751.181	686.275	667.464	236.571	579.754	661.29	657.674	236.059	781.758	708.596	671.439	236.571	3531.95	3201.41	3033.53	1068.82	545.186	0.697385
Boone County, Arkansas	5009	5	36903	7.3293	5.58139	2.41381	0.17	2.3	1.91	1.76	0.17	125.239	114.417	111.281	39.4418	122.939	112.507	109.521	39.2718	130.268	118.089	111.935	39.4418	3530.01	3199.98	3033.22	1068.8	90.8263	0.697226
Bradley County, Arkansas	5011	6	11508	2.96511	1.75983	0.514764	0.019	1.39	0.61	0.31	0.019	38.3091	35.6786	34.7006	12.2979	36.9191	35.0686	34.3906	12.2789	39.8842	36.8285	34.9054	12.2979	3465.78	3200.25	3033.14	1068.64	27.5864	0.691661
Calhoun County, Arkansas	5013	5	5368	0.972288	0.64457	0.155197	0.004	0.24	0.11	0.06	0.004	17.8696	16.6426	16.1864	5.73644	17.6296	16.5326	16.1264	5.73244	18.6019	17.1772	16.2816	5.73644	3465.33	3199.92	3033.08	1068.64	12.8655	0.691621
Carroll County, Arkansas	5015	6	27446	17.964	8.3835	3.91189	0.316857	14.2196	5.65013	3.42513	0.316857	93.1442	85.0961	82.7635	29.3342	78.9246	79.446	79.3384	29.0173	96.8886	87.8295	83.2503	29.3342	3530.15	3200.08	3033.24	1068.8	67.5544	0.697238
Chicot County, Arkansas	5017	6	11800	377.523	376.18	374.868	120.922	375.92	375.01	374.66	120.922	39.2812	36.5839	35.5811	12.6099	-336.639	-338.426	-339.079	-108.313	40.8839	37.7539	35.7894	12.6099	3464.74	3199.49	3033	1068.64	28.274	0.691568
Clark County, Arkansas	5019	5	22995	16.4936	15.0594	12.9609	4.52565	13.371	12.78	12.555	4.52565	76.5484	71.2922	69.3379	24.5733	63.1773	58.5122	56.7829	20.0476	79.6709	73.5716	69.7438	24.5733	3464.71	3199.46	3033	1068.64	55.0976	0.691565
Clay County, Arkansas	5021	6	16083	563.035	562.37	561.01	207.071	560.811	560.746	560.721	207.071	53.5389	49.8626	48.4958	17.1869	-507.272	-510.883	-512.225	-189.885	55.7634	51.4865	48.785	17.1869	3467.23	3201.3	3033.32	1068.64	38.5765	0.691789
Cleburne County, Arkansas	5023	6	25970	39.9032	25.7985	5.48591	0.155397	36.3108	23.1761	5.0189	0.155397	88.1351	80.5198	78.3126	27.7566	51.8243	57.3437	73.2937	27.6012	91.7275	83.1422	78.7796	27.7566	3532.05	3201.47	3033.49	1068.8	63.9708	0.697401
Cleveland County, Arkansas	5025	4	8689	1.99206	1.5375	0.766267	0.059	0.79	0.66	0.61	0.059	28.9249	26.9388	26.2003	9.28538	28.1349	26.2788	25.5903	9.22638	30.127	27.8163	26.3566	9.28538	3467.26	3201.32	3033.33	1068.64	20.8416	0.691792
Columbia County, Arkansas	5027	5	24552	15.6713	7.02604	2.02827	0.04	12.3	4.565	1.59	0.04	81.7315	76.1194	74.0327	26.2372	69.4315	71.5544	72.4427	26.1972	85.1028	78.5804	74.471	26.2372	3466.23	3200.57	3033.2	1068.64	58.8656	0.6917
Conway County, Arkansas	5029	6	21273	40.6669	22.8994	12.9979	3.17069	37.7654	20.7813	12.6207	3.17069	70.8093	65.9472	64.1394	22.731	33.0439	45.1659	51.5187	19.5603	73.7108	68.0653	64.5166	22.731	3464.99	3199.61	3032.79	1068.54	50.9799	0.69162
Craighead County, Arkansas	5031	4	96443	585.019	575.224	564.979	207.911	571.769	565.552	563.257	207.911	321.05	299.005	290.809	103.062	-250.719	-266.546	-272.448	-104.849	334.301	308.678	292.531	103.062	3466.3	3200.63	3033.21	1068.64	231.238	0.691707
Crawford County, Arkansas	5033	3	61948	49.8742	22.2932	7.35818	0.734235	40.5202	15.4648	6.14217	0.734235	210.235	192.069	186.804	66.2097	169.714	176.604	180.662	65.4755	219.589	198.898	188.02	66.2097	3544.72	3210.72	3035.13	1068.8	153.379	0.698483
Crittenden County, Arkansas	5035	2	50902	303.822	299.98	295.027	108.402	296.816	294.866	294.116	108.402	169.448	157.813	153.487	54.3957	-127.368	-137.053	-140.629	-54.0059	176.453	162.927	154.398	54.3957	3466.53	3200.79	3033.23	1068.64	122.058	0.691728
Cross County, Arkansas	5037	6	17870	776.071	774.298	772.389	285.581	773.598	772.493	772.068	285.581	59.4877	55.4029	53.8842	19.0965	-714.11	-717.09	-718.183	-266.484	61.9609	57.2084	54.2057	19.0965	3467.31	3201.36	3033.34	1068.64	42.8643	0.691797
Dallas County, Arkansas	5039	6	8116	1.17916	0.876984	0.20549	0.006	0.06	0.06	0.06	0.006	27.0175	25.1623	24.4725	8.67305	26.9575	25.1023	24.4125	8.66705	28.1366	25.9793	24.618	8.67305	3466.81	3201	3033.27	1068.64	19.4636	0.691752
Desha County, Arkansas	5041	6	13008	669.097	653.92	647.342	233.649	667.3	652.609	647.109	233.649	43.3025	40.3291	39.2236	13.9008	-623.998	-612.28	-607.885	-219.749	45.0987	41.6403	39.4571	13.9008	3467	3201.13	3033.3	1068.64	31.1979	0.691769
Drew County, Arkansas	5043	6	18509	51.6237	49.5723	47.5219	17.2103	49.0814	47.7164	47.1914	17.2103	61.6149	57.3841	55.811	19.7794	12.5335	9.66767	8.61962	2.56908	64.1571	59.2399	56.1415	19.7794	3466.27	3200.6	3033.2	1068.64	44.3777	0.691704
Faulkner County, Arkansas	5045	3	113237	19.5399	14.907	5.21511	0.917288	3.96851	3.53982	3.19082	0.917288	376.956	351.072	341.449	121.009	372.988	347.533	338.258	120.092	392.528	362.439	343.473	121.009	3466.42	3200.72	3033.22	1068.64	271.518	0.691718
Franklin County, Arkansas	5047	6	18125	10.7623	3.79108	1.86558	0.166245	8.26145	1.96547	1.54047	0.166245	61.5113	56.1964	54.656	19.3719	53.2499	54.2309	53.1155	19.2057	64.0121	58.022	54.9811	19.3719	3531.7	3201.21	3033.44	1068.8	44.6402	0.697371
Fulton County, Arkansas	5049	6	12245	116.686	115.906	114.769	11.45	115	114.675	114.55	11.45	40.7625	37.9636	36.9229	13.0855	-74.2375	-76.7114	-77.6271	1.63545	42.4482	39.1941	37.142	13.0855	3466.57	3200.82	3033.24	1068.64	29.3627	0.691731
Garland County, Arkansas	5051	4	96024	24.6426	13.6693	2.98584	0.0185099	11.3785	3.98651	1.26151	0.0185099	319.656	297.706	289.545	102.615	308.277	293.72	288.284	102.596	332.92	307.389	291.27	102.615	3467.05	3201.17	3033.3	1068.64	230.305	0.691773
Grant County, Arkansas	5053	3	17853	7.45166	6.66136	5.14402	1.65945	0.64	0.51	0.46	0.044	59.4311	55.3502	53.8329	19.0784	58.7911	54.8402	53.3729	19.0344	66.2427	61.5016	58.517	20.6938	3710.45	3444.89	3277.71	1159.12	45.5489	0.687606
Greene County, Arkansas	5055	5	42090	507.531	505.09	501.288	180.471	501.769	500.884	500.539	180.471	140.114	130.493	126.916	44.9789	-361.655	-370.391	-373.623	-135.492	145.876	134.699	127.665	44.9789	3465.8	3200.26	3033.14	1068.64	100.897	0.691662
Hempstead County, Arkansas	5057	6	22609	7.43854	4.88055	2.49845	0.189493	4.38504	2.65149	2.10149	0.189493	75.2634	70.0954	68.1739	24.1608	70.8784	67.4439	66.0724	23.9713	78.3169	72.3245	68.5709	24.1608	3463.97	3198.92	3032.9	1068.64	54.1561	0.6915
Hot Spring County, Arkansas	5059	5	32923	21.6941	16.8279	12.5026	4.12459	17.2036	13.5499	11.9188	4.12459	109.598	102.072	99.2742	35.1827	92.3942	88.5224	87.3553	31.0581	114.088	105.35	99.8579	35.1827	3465.31	3199.9	3033.08	1068.64	78.9055	0.691618
Howard County, Arkansas	5061	6	13789	6.15671	4.0819	2.33787	0.185	4.25	2.69	2.09	0.185	46.7961	42.7527	41.5808	14.7376	42.5461	40.0627	39.4908	14.5526	48.7028	44.1446	41.8286	14.7376	3532.01	3201.43	3033.48	1068.8	33.9652	0.697397
Independence County, Arkansas	5063	5	36647	191.852	136.588	119.037	41.3042	186.85	132.937	118.387	41.3042	121.991	113.615	110.5	39.1612	-64.859	-19.3219	-7.88666	-2.14296	126.993	117.266	111.151	39.1612	3465.3	3199.88	3033	1068.61	87.8318	0.691627
Izard County, Arkansas	5065	6	13696	6.96792	5.75013	1.57666	0.073	5.10266	4.38849	1.33417	0.073	45.5928	42.4622	41.2982	14.636	40.4901	38.0737	39.964	14.563	47.458	43.8238	41.5406	14.636	3465.1	3199.75	3033.05	1068.64	32.822	0.6916
Jackson County, Arkansas	5067	6	17997	610.937	609.948	608.348	224.072	608.478	608.153	608.028	224.072	59.9138	55.7998	54.2702	19.2333	-548.564	-552.353	-553.758	-204.838	62.3732	57.5951	54.5899	19.2333	3465.75	3200.26	3033.28	1068.7	43.1398	0.691641
Jefferson County, Arkansas	5069	4	77435	471.511	416.936	396.41	143.981	460.817	409.129	395.019	143.981	257.774	240.074	233.493	82.7499	-203.043	-169.055	-161.526	-61.2313	268.469	247.881	234.883	82.7499	3467.02	3201.15	3033.3	1068.64	185.719	0.691771
Johnson County, Arkansas	5071	6	25540	7.78945	4.6969	1.76623	0.098	4.28	2.135	1.31	0.098	86.6758	79.1866	77.016	27.297	82.3958	77.0516	75.706	27.199	90.1853	81.7485	77.4722	27.297	3531.14	3200.8	3033.37	1068.8	62.8882	0.697323
Lafayette County, Arkansas	5073	6	7645	34.4287	33.6976	32.9092	10.6757	33.4063	32.9513	32.7763	10.6757	25.4495	23.702	23.0523	8.16973	-7.95671	-9.24921	-9.72395	-2.50599	26.472	24.4484	23.1852	8.16973	3462.65	3197.96	3032.73	1068.64	18.3023	0.691382
Lawrence County, Arkansas	5075	6	17415	275.133	274.469	272.947	100.742	272.729	272.714	272.634	100.742	57.963	53.983	52.5032	18.6071	-214.766	-218.731	-220.131	-82.1349	60.3671	55.738	52.8157	18.6071	3466.39	3200.57	3032.77	1068.45	41.76	0.691768
Lee County, Arkansas	5077	6	10424	424.22	423.182	422.07	154.613	422.783	422.133	421.883	154.613	34.7006	32.3179	31.4319	11.1395	-388.083	-389.815	-390.451	-143.473	36.1375	33.3668	31.6188	11.1395	3466.76	3200.96	3033.27	1068.64	24.9981	0.691748
Lincoln County, Arkansas	5079	4	14134	309.763	309.172	307.978	113.279	307.815	307.75	307.725	113.279	47.0509	43.8201	42.6189	15.1041	-260.764	-263.93	-265.106	-98.1754	48.999	45.2423	42.8721	15.1041	3466.75	3200.95	3033.26	1068.64	33.8949	0.691747
Little River County, Arkansas	5081	4	13171	144.875	60.2078	26.7385	4.78722	143.051	58.8764	26.5014	4.78722	43.8451	40.8345	39.7151	14.075	-99.2063	-18.0419	13.2137	9.28779	45.6689	42.1659	39.9522	14.075	3467.38	3201.42	3033.35	1068.64	31.5939	0.691803
Logan County, Arkansas	5083	6	22353	5.81419	4.45855	2.40158	0.288917	2.71924	2.19924	1.99924	0.288917	75.86	69.3053	67.4055	23.8908	73.1408	67.1061	65.4063	23.6019	78.9549	71.5646	67.8079	23.8908	3532.19	3201.57	3033.5	1068.8	55.0642	0.697412
Lonoke County, Arkansas	5085	3	68356	676.297	672.701	666.611	230.314	666.818	665.778	665.378	230.314	227.551	211.926	206.117	73.0477	-439.267	-453.852	-459.261	-157.266	237.029	218.849	207.349	73.0477	3467.57	3201.61	3033.37	1068.64	163.982	0.69182
Madison County, Arkansas	5087	3	15717	4.51015	3.61811	2.23302	0.191	2.41	2.085	1.96	0.191	53.3494	48.7397	47.4037	16.8015	50.9394	46.6547	45.4437	16.6105	55.4495	50.2728	47.6767	16.8015	3528	3198.63	3033.45	1069	38.6481	0.696995
Marion County, Arkansas	5089	6	16653	16.4425	2.58768	0.994826	0.0774573	14.1628	0.923457	0.698457	0.0774573	56.5157	51.6325	50.2172	17.7986	42.353	50.709	49.5187	17.7212	58.7955	53.2967	50.5135	17.7986	3530.63	3200.43	3033.3	1068.8	40.9969	0.697279
Miller County, Arkansas	5091	4	43462	27.9789	25.3896	21.069	7.26409	21.2778	20.4978	20.1978	7.26409	144.681	134.747	131.053	46.4451	123.403	114.249	110.855	39.181	151.382	139.638	131.924	46.4451	3483.1	3212.89	3035.39	1068.64	104.937	0.693194
Mississippi County, Arkansas	5093	5	46480	520.329	513.579	508.116	187.133	513.932	508.91	507.285	187.133	154.728	144.103	140.153	49.6702	-359.204	-364.806	-367.131	-137.463	161.125	148.773	140.985	49.6702	3466.55	3200.8	3033.24	1068.64	111.455	0.691729
Monroe County, Arkansas	5095	6	8149	411.083	410.105	409.366	146.231	410.351	409.571	409.271	146.231	27.1306	25.2677	24.5751	8.70939	-383.22	-384.303	-384.696	-137.522	27.8629	25.8023	24.6702	8.70938	3419.18	3166.31	3027.4	1068.77	19.1535	0.68742
Montgomery County, Arkansas	5097	6	9487	1.93877	1.52311	0.718841	0.054	0.64	0.575	0.55	0.054	32.1963	29.4144	28.6081	10.1397	31.5563	28.8394	28.0581	10.0857	33.4951	30.3625	28.7769	10.1397	3530.63	3200.43	3033.3	1068.8	23.3554	0.697279
Nevada County, Arkansas	5099	6	8997	2.14587	1.55759	0.728064	0.053	0.93	0.67	0.57	0.053	29.9502	27.8937	27.1291	9.61452	29.0202	27.2237	26.5591	9.56152	31.1661	28.7813	27.2871	9.61452	3464.06	3198.99	3032.91	1068.64	21.5516	0.691507
Newton County, Arkansas	5101	5	8330	1.91679	1.41216	0.649083	0.047	0.77	0.575	0.5	0.047	28.2697	25.8271	25.1191	8.90306	27.4997	25.2521	24.6191	8.85606	29.4165	26.6642	25.2682	8.90306	3531.4	3200.99	3033.4	1068.8	20.5135	0.697345
Ouachita County, Arkansas	5103	5	26120	5.87489	3.08829	0.863181	0.0279072	3.24971	1.17191	0.521907	0.0279072	86.9545	80.9838	78.7638	27.9139	83.7048	79.8119	78.2419	27.8859	89.5797	82.9002	79.1051	27.9139	3429.55	3173.82	3028.53	1068.68	61.6659	0.688391
Perry County, Arkansas	5105	3	10445	3.29961	2.34156	1.28755	0.265937	1.91794	1.33294	1.10794	0.265937	34.7705	32.383	31.4953	11.1619	32.8526	31.05	30.3873	10.896	36.1522	33.3916	31.6749	11.1619	3461.19	3196.9	3032.54	1068.64	24.9903	0.691252
Phillips County, Arkansas	5107	5	21757	367.998	366.275	364.117	134.486	364.986	364.076	363.726	134.486	72.4272	67.4539	65.6049	23.2503	-292.559	-296.622	-298.121	-111.236	75.4392	69.6527	65.9964	23.2503	3467.35	3201.39	3033.34	1068.64	52.1889	0.691801
Pike County, Arkansas	5109	6	11291	3.59111	2.34052	1.37862	0.117036	2.07127	1.23104	1.18104	0.117036	38.3186	35.0077	34.0481	12.0678	36.2473	33.7766	32.867	11.9507	39.8384	36.1171	34.2456	12.0678	3528.33	3198.75	3033	1068.8	27.7707	0.697082
Poinsett County, Arkansas	5111	4	24583	1295.19	1293.62	1291.3	476.533	1291.81	1291.16	1290.87	476.533	81.8347	76.2155	74.1262	26.2703	-1209.98	-1214.94	-1216.74	-450.263	85.206	78.6765	74.5645	26.2703	3466.05	3200.44	3033.17	1068.64	58.9357	0.691685
Polk County, Arkansas	5113	6	20662	6.3709	4.69518	2.56448	0.372049	3.01345	2.07637	1.58708	0.142	70.1212	64.0624	62.3063	22.0834	67.1078	61.986	60.7193	21.9414	73.4787	66.6812	63.2837	22.3135	3556.22	3227.24	3062.81	1079.93	51.1652	0.696327
Pope County, Arkansas	5115	5	61754	45.6657	12.6107	5.28226	0.927289	37.2513	6.46824	4.18839	0.927289	205.574	191.458	186.21	65.9926	168.322	184.99	182.021	65.0653	213.988	197.6	187.303	65.9926	3465.17	3199.8	3033.06	1068.64	147.996	0.691606
Prairie County, Arkansas	5117	6	8715	461.934	461.422	460.642	159.454	460.759	460.564	460.489	159.454	29.0115	27.0194	26.2787	9.31317	-431.748	-433.545	-434.211	-150.141	30.1859	27.8767	26.4314	9.31316	3463.67	3198.71	3032.86	1068.64	20.8727	0.691473
Pulaski County, Arkansas	5119	3	382748	114.476	87.5867	51.2855	15.6753	61.6825	49.0473	44.4223	15.6753	1274.13	1186.65	1154.12	409.018	1212.45	1137.6	1109.69	393.343	1326.93	1225.19	1160.98	409.018	3466.85	3201.02	3033.28	1068.64	917.91	0.691755
Randolph County, Arkansas	5121	6	17969	216.407	215.498	213.956	78.8253	214.003	213.743	213.643	78.8253	59.8172	55.7099	54.1827	19.2023	-154.186	-158.033	-159.461	-59.623	62.2214	57.4649	54.4953	19.2023	3462.71	3198	3032.74	1068.64	43.019	0.691387
St. Francis County, Arkansas	5123	5	28258	501.673	498.342	495.121	182.64	496.882	494.607	493.732	182.551	94.0684	87.6092	85.2076	30.1975	-402.814	-406.998	-408.525	-152.354	98.8586	91.3436	86.5959	30.2855	3498.43	3232.49	3064.47	1071.75	68.573	0.693648
Saline County, Arkansas	5125	3	107118	44.0613	21.4759	5.44729	0.196927	28.78	10.19	3.04	0.018	356.586	332.101	322.998	114.47	327.806	321.911	319.958	114.452	371.868	343.387	325.405	114.649	3471.57	3205.69	3037.82	1070.31	257.219	0.691694
Scott County, Arkansas	5127	6	11233	3.10183	2.31266	1.27563	0.154571	1.43	1.04	0.89	0.083	38.1217	34.8278	33.8732	12.0058	36.6917	33.7878	32.9832	11.9228	39.7936	36.1005	34.2588	12.0773	3542.56	3213.79	3049.83	1075.17	27.7162	0.6965
Searcy County, Arkansas	5129	6	8195	2.55916	1.73698	0.86549	0.064	1.44	0.92	0.72	0.064	27.8116	25.4085	24.7121	8.75878	26.3716	24.4885	23.9921	8.69478	28.9308	26.2255	24.8575	8.75878	3530.29	3200.18	3033.26	1068.8	20.172	0.69725
Sebastian County, Arkansas	5131	3	125744	34.0631	25.1583	5.36999	0.179132	1.08252	1.08252	1.08252	0.179132	426.741	389.868	379.181	134.395	425.658	388.786	378.099	134.215	459.721	413.944	383.469	134.395	3656.01	3291.96	3049.6	1068.8	325.327	0.707661
Sevier County, Arkansas	5133	6	17058	6.69121	4.05322	1.89378	0.132112	4.37	2.355	1.58	0.127	56.7846	52.8855	51.4357	18.2288	52.4146	50.5305	49.8557	18.1018	59.1058	54.5837	51.7495	18.2339	3464.99	3199.89	3033.74	1068.94	40.8719	0.691504
Sharp County, Arkansas	5135	6	17264	5.29121	3.29949	1.38176	0.087	2.97	1.605	1.08	0.087	57.4803	53.5334	52.066	18.4521	54.5103	51.9284	50.986	18.3651	59.8016	55.2279	52.3677	18.4521	3463.95	3199.02	3033.35	1068.82	41.3494	0.691444
Stone County, Arkansas	5137	6	12394	3.89618	2.65732	1.33765	0.125785	2.19672	1.41672	1.11672	0.125785	41.2585	38.4255	37.3722	13.2447	39.0618	37.0088	36.2555	13.1189	42.958	39.6661	37.5931	13.2447	3466.03	3200.43	3033.17	1068.64	29.7133	0.691683
Union County, Arkansas	5139	5	41639	22.2749	10.2154	2.76643	0.041	16.61	6.08	2.03	0.041	138.613	129.095	125.556	44.4969	122.003	123.015	123.526	44.4559	144.277	133.23	126.292	44.4969	3464.96	3199.65	3033.03	1068.64	99.7805	0.691588
Van Buren County, Arkansas	5141	6	17295	6.14021	4.68364	1.2208	0.048	3.77755	2.95889	0.913657	0.048	58.6911	53.6199	52.1501	18.4837	54.9136	50.661	51.2365	18.4357	61.0538	55.3446	52.4573	18.4837	3530.14	3200.04	3033.09	1068.73	42.57	0.697255
Washington County, Arkansas	5143	3	203065	45.0491	31.266	8.83309	0.458063	7.66102	3.97263	3.97263	0.458063	689.13	629.586	612.328	217.03	681.469	625.613	608.355	216.572	726.518	656.879	617.189	217.03	3577.76	3234.82	3039.36	1068.77	509.489	0.701275
White County, Arkansas	5145	5	77076	121.583	113.579	87	29.5122	110.93	105.802	85.6152	29.5122	256.579	238.961	232.411	82.3662	145.649	133.159	146.796	52.854	267.232	246.738	233.796	82.3662	3467.12	3201.23	3033.31	1068.64	184.866	0.69178
Woodruff County, Arkansas	5147	6	7260	321.406	319.935	318.904	117.875	320.397	319.198	318.773	117.875	24.1679	22.5084	21.8914	7.7583	-296.23	-296.69	-296.882	-110.117	25.1765	23.2447	22.0225	7.7583	3467.84	3201.75	3033.41	1068.64	17.4182	0.691844
Yell County, Arkansas	5149	5	22185	5.7635	4.09406	1.93696	0.141	2.71	1.865	1.54	0.141	73.8519	68.7809	66.8954	23.7077	71.1419	66.9159	65.3554	23.5667	76.9054	71.0099	67.2924	23.7077	3466.55	3200.81	3033.24	1068.64	53.1977	0.691729
Alameda County, California	6001	1	1510271	359.902	223.136	80.1364	11.1255	181.638	93.0032	56.9621	11.1255	1491.06	1174.95	1127.07	414.572	1309.42	1081.95	1070.11	403.446	1669.32	1305.09	1150.25	414.572	1105.31	864.14	761.617	274.502	1254.75	0.751653
Alpine County, California	6003	6	1175	6.22029	6.04359	5.88416	2.15835	6.04067	5.91067	5.86067	2.15835	4.02069	3.75346	3.70188	1.31263	-2.01998	-2.15721	-2.15878	-0.84572	4.20031	3.88638	3.72537	1.31263	3574.73	3307.56	3170.53	1117.13	2.88768	0.687493
Amador County, California	6005	6	38091	73.3481	39.1321	33.641	9.57399	68.2497	35.4103	32.9782	9.57399	130.342	121.679	120.007	42.5525	62.0924	86.2689	87.029	32.9786	135.441	125.401	120.67	42.5525	3555.71	3292.14	3167.94	1117.13	92.888	0.685821
Butte County, California	6007	4	220000	1090.52	961.172	927.778	333.001	1047.05	929.441	922.127	333.001	752.81	702.775	693.118	245.768	-294.243	-226.666	-229.009	-87.2326	796.277	734.506	698.769	245.768	3619.44	3338.67	3176.22	1117.13	550.509	0.691353
Calaveras County, California	6009	6	45578	47.6363	26.9102	19.5012	6.38185	20.7213	2.64759	1.1328	0.0580645	155.962	145.596	143.595	50.9165	135.24	142.948	142.462	50.8584	182.877	169.858	161.964	57.2403	4012.39	3726.76	3553.55	1255.88	125.636	0.687001
Colusa County, California	6011	6	21419	1224.43	1149.79	1146.67	423.86	1220.95	1147.25	1146.22	423.86	73.2929	68.4215	67.4814	23.9278	-1147.65	-1078.82	-1078.74	-399.933	76.7747	70.9633	67.934	23.9278	3584.42	3313.1	3171.67	1117.13	52.8469	0.688338
Contra Costa County, California	6013	2	1049025	435.628	233.221	122.969	34.357	306.538	138.985	106.188	34.357	1035.68	816.115	782.858	287.959	729.142	677.13	676.671	253.602	1164.77	910.351	799.64	287.959	1110.34	867.807	762.27	274.502	876.812	0.752776
Del Norte County, California	6015	5	28610	19.7312	17.0611	14.6995	5.0125	3.69	1.74	0.99	0.069	97.8995	91.3927	90.1369	31.9611	94.2095	89.6527	89.1469	31.8921	113.941	106.714	103.846	36.9045	3982.55	3729.95	3629.72	1289.92	77.0362	0.676107
El Dorado County, California	6017	2	181058	131.981	48.2801	21.616	5.2505	101.473	26.0097	17.65	5.2505	292.675	251.557	243.759	87.7654	191.202	225.547	226.109	82.5149	323.182	273.827	247.725	87.7654	1784.96	1512.37	1368.21	484.736	235.417	0.728434
Fresno County, California	6019	3	930450	4001.43	3713.46	3541.03	1279.43	3807.53	3571.65	3515.8	1279.43	3183.87	2972.26	2931.42	1039.43	-623.657	-599.395	-584.382	-240.001	3377.78	3114.06	2956.64	1039.43	3630.26	3346.83	3177.65	1117.13	2338.34	0.692273
Glenn County, California	6021	6	28122	839.457	835.368	831.358	306.438	834.787	831.959	830.75	306.438	96.2296	89.8338	88.5994	31.4159	-738.557	-742.125	-742.151	-275.022	100.9	93.243	89.2065	31.4159	3587.93	3315.66	3172.13	1117.13	69.4838	0.688642
Humboldt County, California	6023	5	134623	94.7312	69.857	58.5894	19.9567	81.1079	59.912	56.8184	19.9567	460.661	430.044	424.135	150.391	379.553	370.132	367.316	130.435	474.285	439.989	425.906	150.391	3523.06	3268.31	3163.69	1117.13	323.893	0.682909
Imperial County, California	6025	4	174528	1593.39	1562.81	1535.71	559.014	1567.68	1544.04	1532.36	559.014	575.357	557.515	549.854	194.968	-992.325	-986.522	-982.51	-364.046	601.07	576.286	553.197	194.968	3443.97	3301.97	3169.67	1117.11	406.102	0.675632
Inyo County, California	6027	6	18546	142.442	136.784	132.285	43.7327	139.251	134.454	131.871	43.7327	61.1396	59.2437	58.4296	20.718	-78.1112	-75.2102	-73.4409	-23.0147	64.3312	61.5736	58.8445	20.718	3468.74	3320.05	3172.89	1117.11	43.6132	0.677948
Kern County, California	6029	3	839631	2976.93	2817.59	2579.01	927.622	2766.79	2661.34	2551.48	927.622	2767.96	2682.13	2645.28	937.963	1.17815	20.7874	93.7995	10.3415	2978.11	2838.37	2672.81	937.963	3546.92	3380.5	3183.32	1117.11	2040.14	0.685047
Kings County, California	6031	4	152982	1795.64	1775.55	1753.83	641.677	1767.47	1754.99	1750.17	641.677	523.483	488.691	481.975	170.901	-1243.99	-1266.3	-1268.19	-470.776	551.657	509.257	485.638	170.901	3606.02	3328.87	3174.48	1117.13	380.756	0.690205
Lake County, California	6033	5	64665	63.2698	56.0346	47.4081	16.7167	51.7328	47.6126	45.9083	16.7167	221.275	206.568	203.729	72.2391	169.542	158.955	157.821	55.5225	232.812	214.99	205.229	72.2391	3600.27	3324.67	3173.73	1117.13	160.573	0.68971
Lassen County, California	6035	5	34895	279.677	274.221	269.285	92.4327	274.04	270.106	268.552	92.4327	115.093	111.563	110.031	39.0752	-158.947	-158.544	-158.521	-53.3575	120.73	115.678	110.764	39.0752	3459.81	3315.03	3174.2	1119.79	81.655	0.676343
Los Angeles County, California	6037	1	9818605	2465.04	1500.71	400.868	47.1077	1127.4	524.229	226.974	47.1077	3404.86	2460.66	2159.62	789.507	2277.47	1936.43	1932.64	742.4	4742.5	3437.14	2333.51	789.507	483.012	350.064	237.662	80.4093	3953	0.833525
Madera County, California	6039	4	150865	1059.63	1018.16	998.661	364.955	1036.34	1001.16	995.633	364.955	516.239	481.928	475.306	168.536	-520.1	-519.23	-520.327	-196.419	539.534	498.933	478.334	168.536	3576.27	3307.15	3170.61	1117.13	370.999	0.687628
Marin County, California	6041	2	252409	59.677	41.6759	19.4144	4.76343	16.4582	6.75386	2.92935	0.142	249.198	196.368	188.366	69.2867	232.74	189.614	185.436	69.1447	292.417	231.29	204.851	73.9081	1158.5	916.33	811.583	292.811	218.509	0.747251
Mariposa County, California	6043	6	18251	8.74235	6.30523	4.35331	1.28626	3.34	1.455	0.73	0.044	62.4524	58.3016	57.5004	20.3887	59.1124	56.8466	56.7704	20.3447	67.8547	63.1518	61.1238	21.631	3717.86	3460.18	3349.06	1185.19	46.2238	0.681216
Mendocino County, California	6045	5	87841	116.127	103.91	94.2546	33.6211	105.75	96.335	92.9057	33.6211	300.58	280.602	276.746	98.1297	194.83	184.267	183.841	64.5086	310.956	288.177	278.095	98.1297	3539.99	3280.66	3165.89	1117.13	212.826	0.684426
Merced County, California	6047	3	255793	2070.66	2034.43	1992.09	710.823	2014.39	1993.35	1984.78	710.823	875.288	817.113	805.885	285.754	-1139.1	-1176.24	-1178.89	-425.07	931.564	858.195	813.201	285.754	3641.87	3355.04	3179.14	1117.13	645.81	0.693254
Modoc County, California	6049	6	9686	361.86	360.589	359.296	130.252	360.312	359.46	359.095	130.252	31.947	30.9671	30.5419	10.8463	-328.365	-328.493	-328.553	-119.406	33.4945	32.0967	30.7431	10.8463	3458.03	3313.73	3173.97	1119.79	22.6482	0.676176
Mono County, California	6051	6	14202	318.741	315.552	313.497	111.303	316.323	313.787	313.183	111.303	46.8189	45.3671	44.7437	15.8652	-269.504	-268.42	-268.439	-95.4377	49.2369	47.1322	45.058	15.8652	3466.9	3318.7	3172.65	1117.11	33.3716	0.677777
Monterey County, California	6053	3	415057	746.18	712.425	673.653	245.246	702.105	680.074	667.91	245.246	1420.27	1325.87	1307.65	463.672	718.163	645.798	639.743	218.426	1464.34	1358.22	1313.4	463.672	3528.05	3272.38	3164.37	1117.13	1000.67	0.683358
Napa County, California	6055	4	136484	135.375	116.247	100.361	35.2147	118.629	104.022	98.1837	35.2147	134.748	106.181	101.854	37.4651	16.119	2.15867	3.67052	2.25039	151.494	118.406	104.031	37.4651	1109.97	867.542	762.223	274.502	114.029	0.752695
Nevada County, California	6057	5	98764	77.0523	58.7643	44.4819	15.091	17.4882	4.28501	1.30188	0.0202451	159.649	137.22	132.966	47.8745	142.161	132.935	131.664	47.8543	219.213	191.699	176.146	62.9453	2219.56	1940.98	1783.51	637.33	156.268	0.712858
Orange County, California	6059	1	3010232	803.477	476.602	117.312	9.41989	322.046	118.294	32.6078	0.013449	1043.88	754.401	662.107	242.051	721.833	636.107	629.499	242.038	1525.31	1112.71	746.811	251.458	506.709	369.642	248.091	83.5343	1273.85	0.835143
Placer County, California	6061	2	348432	334.565	227.628	178.028	61.1548	266.531	177.963	169.184	61.1548	563.23	484.102	469.095	168.898	296.698	306.138	299.911	107.743	631.263	533.766	477.939	168.898	1811.73	1531.91	1371.69	484.736	462.366	0.732445
Plumas County, California	6063	6	20007	205.96	160.499	157.371	57.231	202.879	158.249	156.97	57.231	68.4612	63.911	63.0328	22.3504	-134.418	-94.3384	-93.9372	-34.8806	71.5423	66.1602	63.4333	22.3504	3575.86	3306.85	3170.56	1117.13	49.1919	0.687592
Riverside County, California	6065	1	2189641	1515.7	1215.6	859.467	258.628	1043	870.528	798.016	258.628	759.316	548.75	481.615	176.068	-283.685	-321.778	-316.401	-82.5603	1232.01	893.82	543.066	176.068	562.656	408.204	248.016	80.4093	1055.95	0.85709
Sacramento County, California	6067	1	1418788	1107.87	746.337	534.538	162.453	834.852	547.033	499.045	162.453	2293.43	1971.22	1910.12	687.738	1458.58	1424.19	1411.07	525.285	2566.45	2170.53	1945.61	687.738	1808.9	1529.85	1371.32	484.736	1878.71	0.732027
San Benito County, California	6069	2	55269	118.833	110.569	103.338	37.2516	111.759	105.405	102.418	37.2516	54.566	42.9979	41.2457	15.1714	-57.1932	-62.4071	-61.1724	-22.0801	61.6401	48.162	42.1654	15.1714	1115.27	871.411	762.912	274.502	46.4687	0.753871
San Bernardino County, California	6071	2	2035210	932.516	558.337	243.355	50.705	572.355	295.419	196.534	50.705	705.763	510.048	447.648	163.65	133.408	214.629	251.114	112.945	1065.92	772.965	494.469	163.65	523.742	379.796	242.957	80.4093	902.275	0.846471
San Diego County, California	6073	1	3095313	1493.54	647.89	322.789	87.9079	1083.39	348.48	269.469	87.9079	1184.62	433.224	336.148	134.055	101.232	84.7443	66.6793	46.1469	1594.77	732.634	389.468	134.055	515.221	236.691	125.825	43.309	1460.72	0.915941
San Francisco County, California	6075	1	805235	115.147	62.8294	14.134	0.378436	56.3566	19.6364	5.60174	0.000132922	794.992	626.453	600.925	221.038	738.635	606.816	595.323	221.038	853.782	669.646	609.457	221.417	1060.29	831.615	756.868	274.971	632.366	0.740664
San Joaquin County, California	6077	3	685306	2433.42	2335.06	2245.56	813.398	2326.86	2257.28	2231.71	813.398	2345.03	2189.17	2159.09	765.577	18.165	-68.1086	-72.622	-47.8205	2451.58	2266.95	2172.94	765.577	3577.36	3307.95	3170.76	1117.13	1686.01	0.687721
San Luis Obispo County, California	6079	3	269637	988.252	271.186	243.546	85.9969	952.756	245.261	238.93	85.9969	922.661	861.337	849.501	301.219	-30.0957	616.076	610.571	215.222	958.156	887.262	854.117	301.219	3553.5	3290.58	3167.65	1117.13	656.937	0.685626
San Mateo County, California	6081	2	718451	130.319	83.511	25.5483	4.12532	49.9468	24.8394	15.0999	4.12532	709.312	558.937	536.16	197.216	659.365	534.097	521.06	193.091	789.684	617.608	546.608	197.216	1099.15	859.639	760.815	274.502	592.468	0.75026
Santa Barbara County, California	6083	3	423895	369.247	315.18	259.974	90.5303	309.24	271.198	252.159	90.5303	1450.51	1354.1	1335.5	473.545	1141.27	1082.91	1083.34	383.015	1510.52	1398.09	1343.31	473.545	3563.42	3298.19	3168.97	1117.13	1036.97	0.686501
Santa Clara County, California	6085	1	1781642	447.743	256.943	93.4595	18.4541	244.816	108.807	67.079	18.4541	1758.98	1386.07	1329.59	489.064	1514.16	1277.27	1262.51	470.61	1961.91	1534.21	1355.97	489.064	1101.18	861.121	761.079	274.502	1472.84	0.75072
Santa Cruz County, California	6087	3	262382	93.7866	71.8506	51.4527	16.9836	69.9389	54.4418	48.3525	16.9836	259.044	204.127	195.808	72.0243	189.106	149.685	147.456	55.0407	282.892	221.535	198.909	72.0243	1078.17	844.324	758.088	274.502	210.868	0.7454
Shasta County, California	6089	4	177223	532.698	285.092	247.086	77.2484	491.317	254.883	241.707	77.2484	606.433	566.127	558.348	197.981	115.116	311.244	316.641	120.733	647.814	596.335	563.727	197.981	3655.36	3364.89	3180.89	1117.13	449.833	0.694386
Sierra County, California	6091	6	3240	54.393	53.1279	52.4717	19.3262	53.7159	52.6337	52.3837	19.3262	11.0868	10.35	10.2078	3.6195	-42.6291	-42.2837	-42.1759	-15.7067	11.7639	10.8442	10.2958	3.6195	3630.82	3346.97	3177.7	1117.13	8.14436	0.69232
Siskiyou County, California	6093	6	44900	570.553	561.864	555.5	200.312	563.963	557.053	554.643	200.312	148.092	143.55	141.579	50.2787	-415.87	-413.503	-413.064	-150.033	154.683	148.361	142.436	50.2787	3445.05	3304.25	3172.28	1119.79	104.404	0.674956
Solano County, California	6095	3	413344	645.986	583.918	540.348	195.366	591.175	543.906	533.222	195.366	408.086	321.571	308.467	113.464	-183.089	-222.335	-224.755	-81.9021	462.897	361.583	315.593	113.464	1119.88	874.776	763.511	274.502	349.433	0.754884
Sonoma County, California	6097	3	483878	353.766	274.702	230.564	77.3878	302.657	237.393	223.92	77.3878	477.723	376.445	361.105	132.825	175.065	139.052	137.185	55.4375	528.831	413.754	367.749	132.825	1092.9	855.079	760.003	274.502	396.006	0.748832
Stanislaus County, California	6099	3	514453	2338.12	2199.73	2119.33	769.45	2233.86	2123.62	2105.77	769.45	1760.38	1643.38	1620.8	574.708	-473.48	-480.238	-484.977	-194.742	1864.64	1719.49	1634.35	574.708	3624.51	3342.36	3176.87	1117.12	1289.93	0.691786
Sutter County, California	6101	4	94737	998.176	979.116	963.801	354.914	982.715	967.829	961.791	354.914	153.139	131.625	127.545	45.9225	-829.575	-836.204	-834.246	-308.991	168.6	142.911	129.555	45.9225	1779.67	1508.51	1367.52	484.736	122.678	0.727625
Tehama County, California	6103	5	63463	1146.67	1132.71	1123.84	194.056	1137.98	1126.36	1122.71	194.056	217.162	202.728	199.943	70.8963	-920.816	-923.636	-922.764	-123.16	225.852	209.072	201.072	70.8963	3558.8	3294.4	3168.34	1117.13	154.956	0.686094
Trinity County, California	6105	6	13786	47.1812	29.6594	27.723	4.39987	45.0258	28.0392	27.4392	4.39987	47.1738	44.0385	43.4333	15.4007	2.14803	15.9992	15.9941	11.0009	49.3292	45.6586	43.7171	15.4007	3578.21	3311.95	3171.12	1117.13	33.9285	0.687797
Tulare County, California	6107	3	442179	3599.99	3534.03	3470.28	1262.64	3523.56	3478.23	3460.34	1262.64	1457.71	1412.5	1393.09	493.964	-2065.85	-2065.72	-2067.25	-768.679	1534.14	1468.3	1403.03	493.964	3469.5	3320.61	3172.99	1117.11	1040.17	0.678019
Tuolumne County, California	6109	5	55365	126.178	36.049	26.5327	4.39549	117.833	29.957	25.4478	4.39549	189.451	176.86	174.429	61.8498	71.6186	146.903	148.982	57.4543	197.797	182.952	175.514	61.8498	3572.59	3304.47	3170.13	1117.13	135.947	0.687306
Ventura County, California	6111	3	823318	594.011	478.705	362.641	117.556	465.695	385.034	345.96	117.556	285.507	206.333	181.09	66.2024	-180.187	-178.701	-164.869	-51.3536	413.824	300.004	197.771	66.2024	502.629	364.384	240.213	80.4093	347.621	0.840023
Yolo County, California	6113	2	200849	1079.5	1054.87	1026.8	377.08	1043.48	1028.57	1022.11	377.08	324.666	279.054	270.404	97.3588	-718.815	-749.52	-751.71	-279.721	360.687	305.349	275.086	97.3588	1795.81	1520.29	1369.62	484.736	263.328	0.730074
Yuba County, California	6115	4	72155	407.57	353.35	336.774	123.068	396.572	345.322	335.344	123.068	116.636	100.25	97.1425	34.9761	-279.935	-245.072	-238.201	-88.0922	127.635	108.279	98.5722	34.9761	1768.89	1500.64	1366.12	484.736	92.6584	0.725966
Adams County, Colorado	8001	2	441603	333.276	259.038	213.9	74.4696	282.845	222.223	207.344	74.4696	909.714	846.188	824.704	300.727	626.869	623.965	617.36	226.257	960.145	883.003	831.26	300.727	2174.23	1999.54	1882.37	680.989	659.419	0.68679
Alamosa County, Colorado	8003	6	15445	211.822	209.776	207.548	76.4285	208.906	207.644	207.169	76.4285	59.0324	56.7787	55.9734	20.3041	-149.874	-150.865	-151.195	-56.1244	61.9477	58.9105	56.3527	20.3041	4010.86	3814.21	3648.61	1314.6	41.6436	0.672239
Arapahoe County, Colorado	8005	2	572003	260.557	169.777	51.9948	8.55537	93.5954	47.8946	30.2898	8.55537	1178.62	1096.31	1068.48	389.619	1085.02	1048.42	1038.19	381.063	1345.58	1218.2	1090.18	389.619	2352.4	2129.7	1905.91	681.148	955.96	0.710445
Archuleta County, Colorado	8007	6	12084	83.3632	81.1887	78.2337	28.6505	79.2044	78.1528	77.6931	28.6505	46.1863	44.423	43.793	15.8857	-33.0181	-33.7297	-33.9	-12.7649	50.3451	47.459	44.3337	15.8857	4166.26	3927.42	3668.79	1314.6	34.4594	0.684464
Baca County, Colorado	8009	6	3788	136.227	135.594	134.855	49.5822	135.784	135.271	134.798	49.5822	14.4781	13.9254	13.7279	4.97972	-121.306	-121.346	-121.07	-44.6025	14.9203	14.2482	13.7854	4.97972	3938.83	3761.39	3639.22	1314.6	9.94055	0.666245
Bent County, Colorado	8011	6	6499	210.874	210.006	209.23	76.7291	210.114	209.451	209.131	76.7291	24.8398	23.8915	23.5527	8.54361	-185.275	-185.559	-185.579	-68.1854	25.5998	24.4463	23.6515	8.54361	3939.03	3761.54	3639.25	1314.6	17.0562	0.666262
Boulder County, Colorado	8013	3	294567	321.891	259.088	214.08	74.4175	274.693	224.634	207.944	74.4175	606.824	564.449	550.118	200.6	332.131	339.815	342.174	126.182	654.022	598.904	556.254	200.6	2220.28	2033.17	1888.38	680.998	453.423	0.693283
Broomfield County, Colorado	8014	2	55889	8.7973	6.82657	2.80551	0.710596	2.22053	2.02553	1.95053	0.710596	115.094	107.057	104.338	38.0468	112.873	105.031	102.388	37.3362	121.67	111.858	105.193	38.0468	2177	2001.43	1882.19	680.757	83.6236	0.687296
Chaffee County, Colorado	8015	6	17809	141.405	138.431	135.944	43.5779	138.918	136.615	135.621	43.5779	68.0678	65.4692	64.5407	23.4118	-70.85	-71.1462	-71.0803	-20.1661	70.5548	67.2847	64.864	23.4118	3961.75	3778.13	3642.2	1314.6	47.1431	0.668176
Cheyenne County, Colorado	8017	6	1836	52.4932	52.1442	51.3929	17.3106	51.754	51.5786	51.2948	17.3106	7.01738	6.74947	6.65376	2.41361	-44.7367	-44.8291	-44.641	-14.8969	7.75655	7.31511	6.75185	2.41361	4224.7	3984.27	3677.48	1314.6	5.34294	0.688829
Clear Creek County, Colorado	8019	2	9088	2.96297	1.68312	0.545568	0.0869535	1.4155	0.490046	0.140046	4.61656e-05	18.7215	17.4142	16.972	6.18883	17.306	16.9241	16.832	6.18878	20.269	18.6073	17.3776	6.27573	2230.3	2047.45	1912.14	690.552	13.9933	0.690378
Conejos County, Colorado	8021	6	8256	529.896	527.268	524.63	189.128	526.691	524.928	524.213	189.128	31.5553	30.3506	29.9202	10.8534	-495.135	-494.577	-494.293	-178.275	34.7607	32.6906	30.3369	10.8534	4210.36	3959.61	3674.52	1314.6	23.9074	0.687769
Costilla County, Colorado	8023	6	3524	193.526	193.073	192.529	69.6574	192.793	192.533	192.433	69.6574	13.4691	12.9549	12.7711	4.63266	-179.324	-179.579	-179.662	-65.0247	14.2014	13.4948	12.8668	4.63267	4029.9	3829.41	3651.18	1314.6	9.56871	0.673787
Crowley County, Colorado	8025	6	5823	19.1137	18.3532	17.727	6.18318	18.4505	17.8655	17.6405	6.18318	22.2561	21.4064	21.1028	7.65494	3.80561	3.54094	3.46236	1.47176	22.9193	21.8942	21.1893	7.65494	3936	3759.94	3638.9	1314.6	15.2644	0.666005
Custer County, Colorado	8027	6	4255	37.9501	37.602	37.1755	13.6861	37.3698	37.1748	37.0998	13.6861	16.263	15.6422	15.4203	5.59364	-21.1068	-21.5326	-21.6795	-8.09249	16.8433	16.0694	15.4961	5.59364	3958.48	3776.59	3641.84	1314.6	11.2497	0.667902
Delta County, Colorado	8029	6	30952	499.636	495.563	488.637	177.845	489.315	488.028	487.295	177.845	118.302	113.785	112.172	40.6896	-371.013	-374.243	-375.123	-137.155	128.623	121.32	113.513	40.6896	4155.56	3919.61	3667.4	1314.6	87.9332	0.683651
Denver County, Colorado	8031	1	600158	211.359	107.867	30.7766	1.27225	129.647	47.8399	18.9399	0.755919	1236.07	1149.75	1120.56	408.61	1106.42	1101.91	1101.62	407.854	1317.78	1209.78	1132.4	409.126	2195.72	2015.76	1886.83	681.697	908.652	0.689533
Dolores County, Colorado	8033	6	2064	8.02303	7.61726	7.17074	2.60822	7.50522	7.2384	7.10336	2.60822	7.88882	7.58765	7.48004	2.71334	0.383603	0.349244	0.376684	0.105123	8.40663	7.96651	7.54742	2.71334	4072.98	3859.74	3656.7	1314.6	5.69329	0.677238
Douglas County, Colorado	8035	2	285465	73.8694	52.5257	28.0286	8.02982	41.0409	28.5609	23.7609	8.02982	588.066	547.001	533.112	194.398	547.025	518.44	509.351	186.369	620.894	570.965	537.38	194.398	2175.03	2000.12	1882.47	680.989	426.496	0.686906
Eagle County, Colorado	8037	5	52197	191.03	184.488	176.911	64.7212	181.11	177.246	175.621	64.7212	200.238	191.87	189.149	68.6029	19.1285	14.6245	13.5275	3.88165	210.159	199.112	190.439	68.6029	4026.26	3814.63	3648.46	1314.31	141.556	0.673566
Elbert County, Colorado	8039	2	23086	21.559	18.9864	16.3468	5.57973	18.3259	16.6262	15.9265	5.57973	47.2323	44.2437	43.1205	15.7282	28.9064	27.6174	27.194	10.1485	50.4654	46.6038	43.5408	15.7282	2185.97	2018.71	1886.03	681.286	34.7372	0.688337
El Paso County, Colorado	8041	3	622263	175.39	121.54	58.6017	16.2024	80.2337	52.0761	46.2314	16.2024	2378.35	2287.55	2255.11	818.03	2298.12	2235.48	2208.88	801.827	2473.51	2357.02	2267.48	818.03	3975.02	3787.82	3643.93	1314.6	1655.48	0.669284
Fremont County, Colorado	8043	5	46824	184.936	172.13	164.315	59.8068	178.987	167.774	163.54	59.8068	178.966	172.134	169.693	61.555	-0.0212125	4.36007	6.15213	1.74826	184.915	176.49	170.467	61.555	3949.14	3769.21	3640.59	1314.6	123.36	0.667116
Garfield County, Colorado	8045	5	56389	364.674	351.488	341.356	124.187	354.436	344.014	340.025	124.187	216.32	207.28	204.34	74.1124	-138.117	-136.734	-135.685	-50.0741	226.558	214.753	205.671	74.1124	4017.77	3808.43	3647.36	1314.31	152.445	0.672876
Gilpin County, Colorado	8047	2	5441	4.86702	4.35923	3.82801	0.369	4.19	3.865	3.74	0.369	11.2086	10.4259	10.1612	3.70526	7.01861	6.5609	6.42119	3.33626	11.8856	10.9201	10.2492	3.70526	2184.46	2007.01	1883.7	680.989	8.18037	0.688257
Grand County, Colorado	8049	6	14843	257.896	256.522	254.743	94.024	1.45671	0.728167	0.383539	0.026	56.9407	54.5612	53.7874	19.5083	55.484	53.833	53.4038	19.4823	313.38	310.355	308.147	113.506	21113	20909.2	20760.4	7647.12	199.873	0.6378
Gunnison County, Colorado	8051	6	15324	778.153	775.682	773.58	283.719	776.578	774.532	773.375	283.719	58.5699	56.3338	55.5349	20.145	-718.008	-718.198	-717.84	-263.574	60.145	57.4837	55.7397	20.145	3924.89	3751.22	3637.41	1314.6	40	0.66506
Hinsdale County, Colorado	8053	6	843	42.2683	41.5732	41.0978	14.1566	4.59	4.005	3.78	0.369	3.22203	3.09902	3.05507	1.10821	-1.36797	-0.905979	-0.724928	0.739211	40.9003	40.6672	40.3729	14.8958	48517.6	48241	47891.9	17670	26.0045	0.635802
Huerfano County, Colorado	8055	6	6711	53.019	50.8608	49.3583	18.0333	51.8308	49.9934	49.2038	18.0333	25.6501	24.6709	24.321	8.82231	-26.1806	-25.3225	-24.8828	-9.21097	26.8384	25.5383	24.4755	8.82231	3999.16	3805.44	3647.07	1314.6	18.0161	0.67128
Jackson County, Colorado	8057	6	1394	480.785	480.498	479.936	177.479	0.611358	0.450368	0.24099	0.019	5.34767	5.12419	5.05151	1.83214	4.73631	4.67382	4.81052	1.81314	485.521	485.172	484.746	179.292	348293	348043	347737	128617	306.229	0.630723
Jefferson County, Colorado	8059	2	534543	112.567	81.9692	34.2677	7.89996	19.4976	8.44377	4.17387	0.247	1101.2	1024.31	998.299	364.028	1081.71	1015.86	994.125	363.781	1194.27	1097.83	1028.39	371.681	2234.2	2053.78	1923.87	695.325	822.593	0.688781
Kiowa County, Colorado	8061	6	1398	7.79998	7.55392	7.21211	2.54098	7.37849	7.24173	7.15697	2.54098	5.3433	5.1393	5.06642	1.83782	-2.0352	-2.10243	-2.09055	-0.703161	5.76478	5.45149	5.12156	1.83782	4123.59	3899.49	3663.49	1314.6	3.92697	0.681199
Kit Carson County, Colorado	8063	6	8270	181.044	179.749	177.892	64.9365	178.517	177.899	177.563	64.9365	31.6088	30.402	29.9709	10.8718	-146.908	-147.496	-147.593	-54.0647	34.1364	32.2525	30.2999	10.8718	4127.73	3899.93	3663.83	1314.6	23.2646	0.681519
Lake County, Colorado	8065	6	7310	21.0531	19.1873	16.8188	5.90269	2.29	1.055	0.58	0.039	28.0426	26.8707	26.4896	9.60758	25.7526	25.8157	25.9096	9.56858	46.8058	45.003	42.7285	15.4713	6402.98	6156.36	5845.21	2116.45	31.3345	0.669458
La Plata County, Colorado	8067	5	51334	466.019	460.504	453.849	165.026	458.337	454.896	452.85	165.026	196.204	188.713	186.037	67.4839	-262.133	-266.183	-266.813	-97.5418	203.886	194.321	187.036	67.4839	3971.75	3785.43	3643.5	1314.6	136.402	0.669011
Larimer County, Colorado	8069	3	299630	587.644	551.345	537.153	189.116	573.79	541.212	535.35	189.116	1149.44	1101.41	1085.78	393.806	575.651	560.194	550.435	204.69	1163.29	1111.54	1087.59	393.806	3882.44	3709.71	3629.77	1314.31	769.488	0.661474
Las Animas County, Colorado	8071	6	15507	102.595	100.002	94.4703	34.2836	98.1874	96.7841	93.8973	34.2836	59.2693	57.0066	56.1981	20.3856	-38.9181	-39.7775	-37.6992	-13.898	63.6769	60.2241	56.7711	20.3856	4106.33	3883.67	3661	1314.6	43.2913	0.679859
Lincoln County, Colorado	8073	6	5467	7.07708	6.287	5.73476	1.85432	6.33269	5.73304	5.63717	1.85432	20.8954	20.0977	19.8127	7.18694	14.5627	14.3647	14.1755	5.33262	21.6398	20.6517	19.9103	7.18694	3958.26	3777.51	3641.9	1314.6	14.4529	0.667884
Logan County, Colorado	8075	5	22709	228.09	225.27	222.413	81.019	224.911	222.926	221.998	81.019	87.1163	83.4757	82.2918	29.8466	-137.794	-139.45	-139.706	-51.1725	90.2953	85.8199	82.7069	29.8466	3976.19	3779.11	3642.03	1314.31	60.4487	0.669456
Mesa County, Colorado	8077	4	146723	1043.89	1037.86	1028.5	379.574	1029.84	1027.61	1026.68	379.574	562.859	539.337	531.688	192.839	-466.984	-488.268	-494.988	-186.735	576.911	549.595	533.514	192.839	3931.97	3745.8	3636.2	1314.31	384.072	0.665738
Mineral County, Colorado	8079	6	712	25.5652	25.446	25.295	8.34914	3.79	3.725	3.7	0.369	2.72134	2.61744	2.58032	0.935998	-1.06866	-1.10756	-1.11968	0.566998	24.4965	24.3385	24.1754	8.91614	34405.3	34183.3	33954.2	12522.7	15.5804	0.636024
Moffat County, Colorado	8081	5	13795	280.233	215.286	211.714	77.791	277.981	213.642	211.421	77.791	52.9204	50.7089	49.9897	18.1309	-225.06	-162.933	-161.431	-59.6601	55.1724	52.3528	50.2824	18.1309	3999.45	3795.06	3644.97	1314.31	37.0415	0.671378
Montezuma County, Colorado	8083	6	25535	353.253	349.318	346.054	126.069	349.748	346.755	345.598	126.069	97.5974	93.8714	92.5401	33.5684	-252.15	-252.884	-253.058	-92.5009	101.103	96.4336	92.9961	33.5684	3959.39	3776.53	3641.91	1314.6	67.5346	0.667978
Montrose County, Colorado	8085	5	41276	973.122	964.095	956.567	353.019	962.732	956.51	955.216	353.019	157.761	151.738	149.586	54.2616	-804.971	-804.772	-805.63	-298.757	168.151	159.323	150.937	54.2616	4073.83	3859.94	3656.77	1314.6	113.89	0.677305
Morgan County, Colorado	8087	5	28159	268.772	243.314	239.326	85.5399	263.007	239.087	238.576	85.5399	108.024	103.509	102.041	37.0096	-154.983	-135.577	-136.534	-48.5304	113.789	107.736	102.792	37.0096	4040.94	3826	3650.42	1314.31	76.7792	0.674752
Otero County, Colorado	8089	6	18831	603.655	600.358	598.032	220.68	601.541	598.806	597.756	220.68	71.974	69.2262	68.2445	24.7553	-529.567	-529.58	-529.512	-195.924	74.088	70.7784	68.52	24.7553	3934.36	3758.61	3638.68	1314.6	49.3326	0.665866
Ouray County, Colorado	8091	6	4436	153.732	151.066	149.32	53.5264	152.282	150.007	149.132	53.5264	16.9548	16.3076	16.0763	5.83158	-135.327	-133.699	-133.055	-47.6948	18.4056	17.3666	16.2649	5.83158	4149.14	3914.92	3666.56	1314.6	12.574	0.683162
Park County, Colorado	8093	2	16206	36.24	33.7475	31.2803	11.3296	2.69292	0.991313	0.281609	0.001	33.3848	31.0535	30.2651	11.0361	30.6919	30.0622	29.9835	11.0351	66.9319	63.8097	61.2638	22.3647	4130.07	3937.41	3780.31	1380.03	44.5671	0.665858
Phillips County, Colorado	8095	6	4442	81.7293	81.0031	80.0722	29.3939	80.5272	80.1256	79.916	29.3939	17.0404	16.3283	16.0967	5.83815	-63.4868	-63.7973	-63.8192	-23.5558	18.2425	17.2058	16.253	5.83815	4106.82	3873.43	3658.93	1314.31	12.4043	0.679969
Pitkin County, Colorado	8097	5	17148	171.749	166.26	162.005	59.4909	167.369	163.061	161.436	59.4909	65.7832	63.0341	62.1401	22.5377	-101.586	-100.027	-99.2957	-36.9532	70.1631	66.2332	62.7096	22.5377	4091.62	3862.45	3656.96	1314.31	47.6254	0.678781
Prowers County, Colorado	8099	6	12551	205.118	203.41	201.549	73.7529	202.866	201.766	201.257	73.7529	47.9712	46.1398	45.4854	16.4996	-154.895	-155.626	-155.771	-57.2533	50.2233	47.7838	45.7782	16.4996	4001.54	3807.17	3647.38	1314.6	33.7237	0.671475
Pueblo County, Colorado	8101	4	159063	414.663	280.307	232.302	79.298	400.362	269.868	230.443	79.298	607.955	584.745	576.452	209.105	207.593	314.877	346.009	129.807	622.255	595.184	578.311	209.105	3912.01	3741.81	3635.74	1314.6	413.15	0.663956
Rio Blanco County, Colorado	8103	6	6666	369.828	365.63	351.384	126.971	367.576	363.986	351.091	126.971	25.5721	24.5035	24.1559	8.76117	-342.004	-339.482	-326.935	-118.209	27.8243	26.1475	24.4487	8.76117	4174.06	3922.52	3667.67	1314.31	19.0631	0.685125
Rio Grande County, Colorado	8105	6	11982	801.148	799.81	798.23	295.12	799.119	798.327	797.966	295.12	45.7964	44.048	43.4234	15.7516	-753.323	-754.279	-754.543	-279.369	47.8257	45.531	43.6873	15.7516	3991.46	3799.95	3646.08	1314.6	32.0741	0.670646
Routt County, Colorado	8107	5	23509	293.441	272.924	269.282	98.3889	290.153	270.523	268.854	98.3889	90.1853	86.4164	85.1908	30.898	-199.968	-184.107	-183.664	-67.4909	93.4736	88.8169	85.6183	30.898	3976.08	3778	3641.94	1314.31	62.5756	0.669447
Saguache County, Colorado	8109	6	6108	374.679	373.918	372.914	137.793	373.27	372.88	372.73	137.793	23.3454	22.4541	22.1357	8.0296	-349.925	-350.426	-350.594	-129.764	24.7547	23.4919	22.3196	8.0296	4052.83	3846.09	3654.16	1314.6	16.7251	0.675633
San Juan County, Colorado	8111	6	699	2.17435	2.01257	1.8863	0.185	0.2	0.07	0.02	0	2.67165	2.56965	2.53321	0.918908	2.47165	2.49965	2.51321	0.918908	4.646	4.51222	4.39951	1.10391	6646.64	6455.26	6294.01	1579.27	3.54209	0.762396
San Miguel County, Colorado	8113	6	7359	52.8089	52.0278	51.1697	18.8201	51.7035	51.2209	51.026	18.8201	28.1268	27.053	26.6694	9.67417	-23.5767	-24.1679	-24.3566	-9.14591	29.2322	27.8599	26.8131	9.67417	3972.3	3785.83	3643.58	1314.6	19.558	0.669057
Sedgwick County, Colorado	8115	6	2379	84.9956	84.6178	84.1366	31.0275	84.3186	84.1236	84.0486	31.0275	9.12632	8.74493	8.6209	3.12673	-75.1923	-75.3787	-75.4277	-27.9007	9.80334	9.23916	8.70892	3.12674	4120.78	3883.63	3660.75	1314.31	6.67661	0.681054
Summit County, Colorado	8117	5	27994	96.0888	91.2005	85.2667	31	3.98631	1.34757	0.412627	0.00469252	107.391	102.903	101.443	36.7927	103.404	101.555	101.031	36.788	199.493	192.756	186.297	67.788	7126.28	6885.61	6654.9	2421.52	131.705	0.660199
Teller County, Colorado	8119	3	23350	11.1545	8.35127	6.27421	2.096	3.54673	1.26518	0.356542	0	89.5753	85.832	84.6146	30.6891	86.0286	84.5668	84.2581	30.6891	97.1831	92.918	90.5323	32.7851	4162.02	3979.36	3877.19	1404.07	64.398	0.662646
Washington County, Colorado	8121	6	4814	101.737	100.85	99.0205	36.2218	100.326	99.7301	98.8301	36.2218	18.4675	17.6957	17.4447	6.32707	-81.8586	-82.0344	-81.3854	-29.8947	19.8785	18.8158	17.6351	6.32707	4129.32	3908.57	3663.3	1314.31	13.5515	0.681714
Weld County, Colorado	8123	3	252825	655.571	618.746	595.903	214.856	621.733	594.045	591.504	214.856	520.826	484.457	472.156	172.171	-100.907	-109.588	-119.348	-42.6848	554.664	509.158	476.555	172.171	2193.86	2013.87	1884.92	680.989	382.493	0.689594
Yuma County, Colorado	8125	6	10043	305.863	304.41	302.778	109.361	303.943	303.008	302.528	109.361	38.527	36.9169	36.3933	13.1996	-265.416	-266.091	-266.135	-96.1611	40.4475	38.3189	36.643	13.1996	4027.43	3815.48	3648.61	1314.31	27.2479	0.673661
Fairfield County, Connecticut	9001	3	916829	360.871	165.37	43.8291	2.07982	265.867	96.017	31.4786	2.07982	800.756	75.0582	37.4794	13.4054	534.889	-20.9588	6.00088	11.3256	895.76	144.411	49.8299	13.4054	977.02	157.511	54.3503	14.6215	882.354	0.985035
Hartford County, Connecticut	9003	1	894014	1696.13	110.866	39.3352	5.7799	1603.49	43.2374	27.2918	5.7799	755.457	83.2595	50.6217	10.1737	-848.03	40.0221	23.3299	4.39379	848.098	150.888	62.6651	10.1737	948.641	168.775	70.0941	11.3798	837.925	0.988004
Litchfield County, Connecticut	9005	5	189927	103.229	45.9841	13.6091	0.829044	83.5401	31.6113	11.0496	0.829044	165.882	15.5488	7.7641	2.77702	82.3417	-16.0625	-3.28549	1.94798	185.571	29.9217	10.3237	2.77702	977.063	157.543	54.3559	14.6215	182.794	0.985035
Middlesex County, Connecticut	9007	2	165676	33.5967	20.7631	6.96551	0.762678	16.4225	8.22594	4.73286	0.762678	139.999	15.4294	9.38103	1.88535	123.576	7.20341	4.64817	1.12267	157.173	27.9665	11.6137	1.88535	948.676	168.803	70.0987	11.3797	155.287	0.988005
New Haven County, Connecticut	9009	3	862477	683.501	90.9512	23.7826	2.60696	587.351	18.9332	5.39294	0.10198	753.282	70.6083	35.2574	12.6107	165.932	51.6752	29.8645	12.5087	849.433	142.626	53.6471	15.1157	984.876	165.368	62.2012	17.5259	834.318	0.982205
New London County, Connecticut	9011	3	274055	528.18	44.1452	12.1954	0.895783	497.686	21.3179	6.40415	0.118729	244.799	31.2589	14.8147	3.41258	-252.887	9.94097	8.41056	3.29385	275.293	54.0862	20.606	4.18963	1004.52	197.355	75.1893	15.2876	271.103	0.984781
Tolland County, Connecticut	9013	2	152691	34.3845	19.395	5.5045	0.585342	17.0445	6.32647	1.92803	0.023	129.026	14.2201	8.64579	1.73758	111.982	7.89359	6.71776	1.71458	146.366	27.2886	12.2223	2.29993	958.577	178.718	80.0457	15.0626	144.066	0.984286
Windham County, Connecticut	9015	3	118428	55.451	45.3586	34.3678	3.39729	43.1817	36.402	32.7728	3.39729	100.073	11.0292	6.70572	1.34768	56.8916	-25.3729	-26.0671	-2.04961	112.343	19.9857	8.30073	1.34768	948.615	168.758	70.0909	11.3797	110.995	0.988004
Kent County, Delaware	10001	4	162310	153.416	54.8648	41.7121	14.2165	135.468	41.7628	39.3789	14.2165	123.204	40.2933	27.0347	13.3172	-12.2643	-1.46953	-12.3442	-0.899243	141.152	53.3953	29.3679	13.3172	869.643	328.971	180.937	82.048	127.835	0.905653
New Castle County, Delaware	10003	2	538479	203.59	97.3957	26.863	1.90351	144.067	53.9442	19.1251	1.90351	408.74	133.677	89.6902	44.1811	264.673	79.7325	70.5651	42.2776	468.263	177.128	97.4281	44.1811	869.603	328.942	180.932	82.048	424.082	0.905649
Sussex County, Delaware	10005	3	197145	174.234	127.163	104.897	36.16	152.445	111.257	102.065	36.16	149.646	48.941	32.8369	16.1754	-2.79953	-62.3162	-69.2278	-19.9846	171.435	64.847	35.6695	16.1754	869.588	328.93	180.93	82.048	155.259	0.905647
District of Columbia, District of Columbia	11001	1	601723	103.681	75.7243	13.5987	0.051122	0	0	0	0	724.118	142.409	119.056	40.8369	724.118	142.409	119.056	40.8369	827.799	218.134	132.654	40.888	1375.71	362.515	220.457	67.9515	786.911	0.950606
Alachua County, Florida	12001	3	247336	164.252	55.1832	35.0272	10.8437	139.575	37.1692	31.8192	10.8437	205.292	83.9844	75.7572	27.4251	65.7175	46.8151	43.938	16.5814	229.969	101.998	78.9652	27.4251	929.784	412.388	319.263	110.882	202.544	0.880744
Baker County, Florida	12003	2	27115	11.2972	6.76019	2.25398	0.393639	5.96389	2.77889	1.55389	0.393639	21.1823	7.38836	6.33204	2.3274	15.2184	4.60947	4.77815	1.93376	26.5156	11.3697	7.03213	2.3274	977.893	419.312	259.345	85.8344	24.1882	0.912225
Bay County, Florida	12005	4	168852	122.139	38.5308	12.6347	1.83825	95.0163	17.493	5.118	0.140998	91.2043	57.3837	51.7672	18.7717	-3.81201	39.8907	46.6492	18.6307	118.327	78.4215	59.2839	20.469	700.771	464.439	351.1	121.224	97.8576	0.827013
Bradford County, Florida	12007	6	28520	8.28205	5.16151	1.91926	0.32762	4.27519	2.19519	1.39519	0.32762	23.672	9.68413	8.73547	3.16236	19.3968	7.48894	7.34028	2.83474	27.6789	12.6504	9.25954	3.16236	970.507	443.564	324.668	110.882	24.5165	0.885748
Brevard County, Florida	12009	3	543376	155.947	140.435	111.51	38.8379	107.865	105.335	105.26	38.8379	516.857	184.505	166.431	60.2504	408.993	79.1707	61.1715	21.4124	564.94	219.605	172.682	60.2504	1039.68	404.15	317.794	110.882	504.689	0.893351
Broward County, Florida	12011	2	1748066	669.513	246.092	95.4722	21.1225	468.397	99.277	69.327	21.1225	1296.99	241.834	199.933	90.7099	828.59	142.557	130.606	69.5874	1498.1	388.65	226.078	90.7099	857.006	222.331	129.331	51.8916	1407.39	0.93945
Calhoun County, Florida	12013	6	14625	6.91915	5.40164	3.94051	1.15712	5.1506	4.1106	3.7106	1.15712	7.8996	4.97025	4.48378	1.6259	2.74899	0.859651	0.773178	0.468777	9.66814	6.26129	4.71369	1.6259	661.069	428.122	322.304	111.173	8.04224	0.831829
Charlotte County, Florida	12015	4	159978	88.367	83.0196	71.9693	25.6555	71.4277	70.6539	69.7672	25.6555	132.784	54.3215	49.0001	17.7387	61.3564	-16.3324	-20.7671	-7.91676	149.723	66.6872	51.2022	17.7387	935.9	416.852	320.058	110.882	131.985	0.881524
Citrus County, Florida	12017	4	141236	522.817	35.6441	14.7814	3.52799	496.054	16.1071	11.3023	3.52799	117.228	47.9575	43.2596	15.6605	-378.826	31.8504	31.9573	12.1326	143.991	67.4945	46.7387	15.6605	1019.51	477.885	330.927	110.882	128.33	0.891239
Clay County, Florida	12019	2	190865	37.886	26.1833	14.2718	4.12554	22.9501	15.2801	12.3301	4.12554	149.104	52.0073	44.5718	16.3828	126.154	36.7272	32.2417	12.2572	164.04	62.9105	46.5135	16.3828	859.456	329.608	243.698	85.8344	147.657	0.900129
Collier County, Florida	12021	3	321520	360.32	326.542	284.351	101.285	304.528	285.814	277.098	101.285	266.866	109.174	98.4792	35.6508	-37.6621	-176.64	-178.618	-65.6345	322.658	149.902	105.732	35.6508	1003.54	466.229	328.851	110.882	287.007	0.889509
Columbia County, Florida	12023	5	67531	23.9246	16.9163	10.5396	2.97706	16.505	11.5	9.57502	2.97706	56.0525	22.9309	20.6846	7.48809	39.5475	11.4309	11.1095	4.51103	63.4721	28.3472	21.6491	7.48809	939.896	419.765	320.58	110.884	55.984	0.882026
DeSoto County, Florida	12027	5	34862	139.551	114.191	102.655	36.4387	134.097	110.156	101.781	36.4197	28.936	11.8376	10.678	3.86557	-105.161	-98.3184	-91.103	-32.5542	34.3901	15.8722	11.5525	3.88457	986.465	455.288	331.377	111.427	30.5056	0.887044
Dixie County, Florida	12029	6	16422	7.69632	6.03016	4.47758	1.45042	5.85869	4.68869	4.23869	1.45042	13.6305	5.57619	5.02994	1.82091	7.7718	0.887495	0.791248	0.37049	15.4681	6.91765	5.26883	1.82091	941.915	421.243	320.84	110.882	13.6472	0.88228
Duval County, Florida	12031	1	864263	752.322	129.069	37.2454	4.93026	637.491	45.2424	22.3174	4.93026	675.164	235.496	201.827	74.1835	37.6732	190.254	179.51	69.2532	789.995	319.323	216.755	74.1835	914.068	369.474	250.798	85.8344	715.811	0.906096
Escambia County, Florida	12033	3	297619	179.226	68.491	23.2204	3.39156	143.233	42.2164	18.5414	3.39156	160.757	101.145	91.245	33.0871	17.5234	58.9284	72.7036	29.6955	196.75	127.419	95.924	33.0871	661.079	428.129	322.305	111.173	163.662	0.831831
Flagler County, Florida	12035	3	95696	35.2908	28.042	19.5778	6.45671	23.8506	19.6906	18.0906	6.45671	70.3373	23.9445	20.7759	7.29448	46.4867	4.25398	2.6853	0.837777	81.7775	32.2959	22.2631	7.29448	854.556	337.485	232.644	76.2256	74.4831	0.910801
Franklin County, Florida	12037	6	11549	3.21793	2.15701	0.754948	0.153366	0.8	0.28	0.08	0	9.58583	3.92153	3.53737	1.28058	8.78583	3.64153	3.45737	1.28058	12.0038	5.79854	4.21232	1.43394	1039.38	502.081	364.735	124.162	10.5698	0.880542
Gadsden County, Florida	12039	3	46389	32.3433	22.269	17.7792	6.12225	26.4435	17.9622	17.0122	6.12225	39.6299	16.2124	14.6243	5.29418	13.1863	-1.74977	-2.38795	-0.828078	45.5296	20.5192	15.3912	5.29418	981.474	442.33	331.786	114.126	40.2354	0.88372
Gilchrist County, Florida	12041	3	16939	14.3843	12.4358	10.7335	3.4736	12.4638	11.0338	10.4838	3.4736	14.0596	5.75174	5.18829	1.87823	1.59582	-5.28205	-5.2955	-1.59537	15.9801	7.15372	5.43796	1.87823	943.393	422.323	321.032	110.882	14.1019	0.882465
Glades County, Florida	12043	6	12884	224.986	222.426	213.974	78.1903	223.328	221.216	213.758	78.1903	10.6939	4.37484	3.94627	1.4286	-212.634	-216.841	-209.812	-76.7617	12.3519	5.58518	4.16181	1.4286	958.702	433.498	323.022	110.882	10.9233	0.884341
Gulf County, Florida	12045	4	15863	3.23121	2.19052	0.713984	0.0772342	0.91	0.455	0.28	0.021	8.56829	5.39098	4.86333	1.76353	7.65829	4.93598	4.58333	1.74253	10.8895	7.1265	5.29731	1.81977	686.472	449.253	333.942	114.718	9.06974	0.832888
Hamilton County, Florida	12047	6	14799	52.8167	46.3458	19.2899	5.11186	51.2002	45.1657	19.0798	5.11186	12.2834	5.02509	4.53283	1.64094	-38.9168	-40.1406	-14.547	-3.47092	13.8999	6.20517	4.74298	1.64094	939.249	419.297	320.493	110.882	12.259	0.881946
Hardee County, Florida	12049	5	27731	167.915	67.5969	65.4874	23.7559	165.705	65.9831	65.2	23.7559	23.0171	9.41622	8.4938	3.07487	-142.687	-56.5669	-56.7062	-20.681	25.2278	11.03	8.78119	3.07487	909.733	397.75	316.656	110.882	22.1529	0.878116
Hendry County, Florida	12051	5	39140	587.401	582.847	578.58	213.425	582.331	579.146	577.921	213.425	32.4868	13.2902	11.9883	4.33993	-549.844	-565.856	-565.932	-209.085	37.5575	16.9919	12.6475	4.33993	959.568	434.13	323.135	110.882	33.2176	0.884446
Hernando County, Florida	12053	2	172778	57.1192	38.4935	16.1972	3.85392	32.1661	20.2778	12.9533	3.85392	152.606	63.3486	56.8787	20.636	120.44	43.0708	43.9254	16.782	177.559	81.5643	60.1226	20.636	1027.67	472.076	347.976	119.436	156.923	0.88378
Highlands County, Florida	12055	4	98786	152.313	144.943	136.901	49.4652	141.784	137.258	135.533	49.4652	81.9938	33.5434	30.2574	10.9536	-59.7907	-103.714	-105.275	-38.5116	92.5221	41.2291	31.6261	10.9536	936.592	417.357	320.148	110.882	81.5686	0.881611
Hillsborough County, Florida	12057	1	1229226	1044.17	235.417	128.28	35.8607	943.213	161.717	115.155	35.8607	1085.71	450.692	404.662	146.814	142.499	288.975	289.507	110.953	1186.67	524.392	417.787	146.814	965.381	426.604	339.878	119.436	1039.86	0.876281
Holmes County, Florida	12059	6	19927	7.80876	5.68862	3.60496	0.943186	5.25266	3.82266	3.27266	0.943186	10.7634	6.77212	6.10928	2.21534	5.51077	2.94945	2.83662	1.27215	13.3195	8.63807	6.44158	2.21534	668.416	433.486	323.259	111.173	11.1042	0.833678
Indian River County, Florida	12061	4	138028	199.506	188.833	178.07	64.8842	184.984	178.232	176.182	64.8842	131.293	46.8682	42.277	15.3049	-53.6916	-131.364	-133.905	-49.5794	145.814	57.4689	44.1648	15.3049	1056.41	416.357	319.97	110.882	130.509	0.895038
Jackson County, Florida	12063	6	49746	34.0927	28.9343	24.1605	8.06301	28.3864	24.7687	23.4187	8.06301	26.87	16.906	15.2513	5.53039	-1.5164	-7.86267	-8.16737	-2.53262	32.5763	21.0716	15.9931	5.53039	654.852	423.584	321.495	111.173	27.0459	0.830232
Jefferson County, Florida	12065	3	14761	11.1854	9.70677	8.21261	2.81515	9.32013	8.34513	7.97013	2.81515	12.2518	5.01218	4.52119	1.63673	2.93171	-3.33295	-3.44894	-1.17842	14.1171	6.37382	4.76367	1.63673	956.378	431.802	322.72	110.882	12.4804	0.88406
Lafayette County, Florida	12067	6	8870	9.69983	8.78123	7.93435	2.37836	8.70502	8.05502	7.80502	2.37836	7.36222	3.01186	2.71682	0.983524	-1.3428	-5.04316	-5.0882	-1.39483	8.35703	3.73807	2.84614	0.983524	942.168	421.428	320.873	110.882	7.37351	0.882312
Lake County, Florida	12069	2	297052	153.732	122.049	80.8085	26.1796	102.555	84.6898	74.1555	26.1796	218.335	74.3268	64.4908	22.643	115.781	-10.363	-9.66467	-3.53661	269.513	111.686	71.1438	22.643	907.291	375.982	239.5	76.2256	246.87	0.915986
Lee County, Florida	12071	3	618754	566.335	220.83	163.371	55.1572	502.046	173.899	155.013	55.1572	513.575	210.101	189.52	68.6087	11.5287	36.2025	34.5068	13.4515	577.864	257.033	197.877	68.6087	933.916	415.404	319.8	110.882	509.255	0.881272
Leon County, Florida	12073	3	275487	107.326	31.5338	8.61411	0.936517	79.043	10.8873	4.93734	0.936517	228.658	93.5432	84.3796	30.5466	149.615	82.6559	79.4423	29.6101	256.941	114.19	88.0564	30.5466	932.679	414.501	319.639	110.882	226.394	0.881114
Levy County, Florida	12075	6	40801	47.6379	44.1846	40.9301	14.645	43.7554	41.3504	40.4254	14.645	33.8654	13.8542	12.497	4.5241	-9.88997	-27.4962	-27.9283	-10.1209	37.7479	16.6884	13.0018	4.5241	925.171	409.02	318.663	110.882	33.2238	0.88015
Liberty County, Florida	12077	6	8365	1.92916	1.10698	0.23549	0.001	0.81	0.29	0.09	0.001	6.94307	2.84039	2.56214	0.927529	6.13307	2.55039	2.47214	0.926529	8.06223	3.65737	2.70763	0.927529	963.805	437.223	323.686	110.882	7.1347	0.884954
Madison County, Florida	12079	6	19224	20.7217	18.2078	15.9659	5.40746	18.1518	16.3318	15.6318	5.40746	15.9579	6.5283	5.88878	2.13182	-2.19393	-9.80349	-9.74301	-3.27564	18.5278	8.40434	6.22287	2.13182	963.783	437.179	323.703	110.894	16.396	0.884939
Manatee County, Florida	12081	3	322833	469.807	149.167	124.448	43.5257	444.785	130.901	121.195	43.5257	267.956	109.62	98.8814	35.7964	-176.829	-21.2815	-22.3136	-7.72929	292.978	127.886	102.134	35.7964	907.522	396.137	316.369	110.882	257.182	0.877819
Marion County, Florida	12083	3	331298	108.785	74.783	38.862	10.8906	63.1898	41.4984	32.9347	10.8906	274.982	112.494	101.474	36.735	211.792	70.9957	68.5395	25.8444	320.577	145.779	107.402	36.735	967.64	440.023	324.184	110.882	283.842	0.88541
Martin County, Florida	12085	3	146318	790.758	92.7636	78.1488	27.5618	771.566	78.7539	75.6539	27.5618	139.178	49.6832	44.8162	16.2241	-632.388	-29.0707	-30.8377	-11.3377	158.37	63.6929	47.3111	16.2241	1082.37	435.305	323.344	110.882	142.146	0.897556
Miami-Dade County, Florida	12086	1	2496435	1410.21	426.357	172.534	40.6595	1007.92	103.111	24.9376	0.129962	1852.26	345.37	285.529	129.545	844.339	242.259	260.592	129.415	2254.55	668.616	433.126	170.075	903.107	267.828	173.498	68.127	2084.47	0.924564
Monroe County, Florida	12087	5	73090	17.7006	13.1161	3.48268	0.511237	0.388241	0.105017	0.0300173	1.72832e-05	60.6657	24.8181	22.3869	8.10437	60.2775	24.7131	22.3569	8.10436	77.9781	37.8292	25.8396	8.61559	1066.88	517.57	353.531	117.876	69.3625	0.889513
Nassau County, Florida	12089	2	73314	79.0627	37.8984	13.9083	2.2647	62.6208	25.8958	11.7708	2.2647	57.273	19.9768	17.1207	6.29286	-5.34779	-5.91905	5.34985	4.02816	73.715	31.9794	19.2581	6.29286	1005.47	436.197	262.68	85.8344	67.4221	0.914633
Okaloosa County, Florida	12091	4	180822	37.2804	23.7936	9.11189	1.95575	18.1442	9.82418	6.62418	1.95575	97.6698	61.4517	55.437	20.1025	79.5256	51.6275	48.8128	18.1467	116.806	75.4211	57.9247	20.1025	645.972	417.101	320.341	111.173	96.7035	0.827899
Okeechobee County, Florida	12093	5	39996	87.4641	84.492	81.4705	28.582	83.6783	81.7283	80.9783	28.582	33.1973	13.5809	12.2505	4.43484	-50.4811	-68.1475	-68.7278	-24.1471	36.983	16.3445	12.7426	4.43484	924.668	408.653	318.598	110.882	32.5482	0.880084
Orange County, Florida	12095	1	1145956	551.133	205.635	79.1189	16.4724	404.772	98.792	60.092	16.4724	842.286	286.735	248.79	87.3512	437.514	187.943	188.698	70.8788	988.647	393.578	267.817	87.3512	862.727	343.45	233.706	76.2256	901.296	0.911646
Osceola County, Florida	12097	2	268685	239.297	116.855	87.4981	29.1966	198.911	87.3729	82.2479	29.1966	197.485	67.2289	58.3322	20.4807	-1.42555	-20.1439	-23.9156	-8.71596	237.872	96.711	63.5825	20.4807	885.319	359.942	236.643	76.2256	217.391	0.9139
Palm Beach County, Florida	12099	2	1320134	1959.66	846.001	675.192	234.404	1724.81	674.565	644.663	234.404	979.48	182.633	150.989	68.5038	-745.333	-491.933	-493.674	-165.9	1214.32	354.068	181.518	68.5038	919.849	268.206	137.5	51.8916	1145.82	0.943587
Pasco County, Florida	12101	2	464697	238.156	89.7195	37.8929	8.76645	176.961	45.0476	29.9377	8.76645	410.443	170.38	152.979	55.5017	233.482	125.332	123.041	46.7352	471.638	215.052	160.934	55.5017	1014.94	462.779	346.32	119.436	416.136	0.882321
Pinellas County, Florida	12103	1	916542	302.55	55.4533	13.478	1.59537	229.294	0.849485	0.324485	0.0514851	809.535	336.048	301.726	109.468	580.241	335.198	301.402	109.417	882.791	390.651	314.88	111.012	963.176	426.223	343.552	121.121	771.779	0.874249
Polk County, Florida	12105	3	602095	1020.66	276.461	190.501	62.1886	938.328	216.357	179.798	62.1886	499.747	204.445	184.417	66.7616	-438.581	-11.9125	4.61927	4.57294	582.081	264.549	195.121	66.7616	966.76	439.38	324.07	110.882	515.32	0.885305
Putnam County, Florida	12107	5	74364	465.588	56.8886	36.9729	11.391	454.48	48.7793	35.5287	11.391	61.7232	25.2507	22.7771	8.24564	-392.756	-23.5285	-12.7516	-3.14536	72.8318	33.3601	24.2213	8.24564	979.397	448.605	325.712	110.882	64.5862	0.886785
St. Johns County, Florida	12109	2	190039	64.5444	52.5548	40.3042	13.7263	49.498	41.438	38.338	13.7263	148.459	51.7823	44.3789	16.3119	98.9608	10.3443	6.04093	2.58562	163.505	62.8991	46.3452	16.3119	860.377	330.98	243.872	85.8343	147.193	0.900236
St. Lucie County, Florida	12111	3	277789	849.412	125.962	102.106	35.5412	816.611	102.017	97.8419	35.5412	264.234	94.3249	85.0848	30.8019	-552.377	-7.69192	-12.757	-4.73933	297.035	118.27	89.3489	30.8019	1069.28	425.753	321.643	110.882	266.233	0.896302
Santa Rosa County, Florida	12113	3	151372	39.348	28.7682	15.571	4.37744	19.8526	14.5366	13.0366	4.37744	81.7626	51.4432	46.4081	16.8284	61.91	36.9067	33.3716	12.451	101.258	65.6749	48.9425	16.8284	668.935	433.864	323.326	111.173	84.4296	0.833806
Sarasota County, Florida	12115	3	379448	46.2658	37.4349	18.3854	5.25112	14.7913	14.4585	14.2937	5.25112	314.947	128.844	116.222	42.074	300.156	114.385	101.928	36.8229	346.422	151.82	120.314	42.074	912.963	400.108	317.076	110.882	304.348	0.878547
Seminole County, Florida	12117	2	422718	97.8549	65.6323	26.8738	6.3698	44.7157	26.8407	19.9657	6.3698	310.701	105.77	91.7732	32.2219	265.985	78.9296	71.8075	25.8521	363.84	144.562	98.6813	32.2219	860.716	341.982	233.445	76.2256	331.618	0.911439
Sumter County, Florida	12119	4	93420	51.5509	36.8253	18.737	5.20466	26.6945	18.6802	15.5057	5.20466	68.6644	23.3751	20.2817	7.12099	41.9699	4.69486	4.77602	1.91634	93.5207	41.5202	23.5131	7.12099	1001.08	444.446	251.692	76.2256	86.3997	0.923857
Suwannee County, Florida	12121	6	41551	75.0337	39.4585	35.1138	11.9338	70.6676	36.2712	34.5462	11.9338	34.4879	14.1089	12.7268	4.60726	-36.1797	-22.1623	-21.8195	-7.32653	38.854	17.2961	13.2944	4.60726	935.092	416.263	319.953	110.882	34.2468	0.881421
Taylor County, Florida	12123	6	22570	60.5485	22.7503	6.71805	0.2166	56.97	19.985	5.76	0.007	18.7318	7.66309	6.91241	2.50239	-38.2382	-12.3219	1.15241	2.49539	22.3103	10.4284	7.87047	2.71199	988.493	462.046	348.714	120.159	19.5983	0.878442
Union County, Florida	12125	6	15535	5.30495	3.52745	1.96632	0.511771	3.53641	2.23641	1.73641	0.511771	12.8943	5.275	4.75826	1.72255	9.35786	3.03859	3.02185	1.21078	14.6628	6.56604	4.98817	1.72255	943.857	422.661	321.092	110.882	12.9403	0.882522
Volusia County, Florida	12127	3	494593	477.555	121.078	81.883	26.6567	425.438	83.0328	75.1078	26.6567	363.533	123.755	107.378	37.7009	-61.9058	40.7226	32.2706	11.0442	415.649	161.801	114.154	37.7009	840.386	327.139	230.803	76.2262	377.948	0.909296
Wakulla County, Florida	12129	3	30776	48.5093	5.13608	1.56565	0.215207	43.8392	1.57772	0.477719	0.0107188	25.5445	10.4502	9.42646	3.41251	-18.2947	8.87245	8.94875	3.40179	30.2146	14.0085	10.5144	3.617	981.758	455.177	341.643	117.527	26.5976	0.88029
Walton County, Florida	12131	4	55043	19.4461	13.6428	6.00191	1.37695	8.54472	5.68472	4.58472	1.37695	29.7311	18.7062	16.8753	6.11928	21.1864	13.0214	12.2905	4.74233	40.6325	26.6642	18.2924	6.11928	738.196	484.425	332.33	111.173	34.5132	0.8494
Washington County, Florida	12133	6	24896	6.93884	4.52512	2.26685	0.565005	4.25839	2.56839	1.91839	0.565005	13.4474	8.46081	7.6327	2.76775	9.18901	5.89242	5.7143	2.20275	16.1279	10.4175	7.98115	2.76775	647.809	418.442	320.58	111.173	13.3601	0.828387
Appling County, Georgia	13001	6	18236	214.891	5.3	3.56517	1.1158	212.708	3.70637	3.28137	1.1158	12.7053	6.40259	5.16262	1.61408	-200.003	2.69622	1.88125	0.498274	14.8883	7.99622	5.44642	1.61408	816.426	438.485	298.663	88.5106	13.2743	0.891588
Atkinson County, Georgia	13003	6	8375	4.04839	3.0371	2.22312	0.367049	3.19175	2.41175	2.11175	0.367049	5.83987	2.94289	2.37295	0.741896	2.64811	0.531137	0.261195	0.374847	6.6965	3.56824	2.48431	0.741896	799.583	426.058	296.634	88.5845	5.95461	0.889212
Bacon County, Georgia	13005	6	11096	3.76938	2.62752	1.52339	0.425088	2.42916	1.64916	1.34916	0.425088	7.73075	3.89577	3.14128	0.982113	5.30159	2.24661	1.79213	0.557025	9.07098	4.87413	3.31551	0.982113	817.5	439.269	298.803	88.5106	8.08886	0.89173
Baker County, Georgia	13007	4	3451	50.6573	50.3541	50.0387	18.2166	50.2566	50.0616	49.9866	18.2166	2.40436	1.21163	0.97698	0.30545	-47.8522	-48.8499	-49.0096	-17.9112	2.80505	1.50413	1.02907	0.30545	812.822	435.855	298.195	88.5105	2.4996	0.891107
Baldwin County, Georgia	13009	5	45720	9.92066	5.20741	1.3412	0.0580749	5.54075	1.98024	0.675652	0.0171773	31.874	16.0623	12.9516	4.04927	26.3333	14.0821	12.2759	4.03209	36.2539	19.2895	13.6171	4.09017	792.956	421.905	297.837	89.4612	32.1638	0.88718
Banks County, Georgia	13011	6	18395	5.8887	3.32683	1.30832	0.073	3.83	1.815	1.04	0.073	12.8161	6.45842	5.20764	1.62815	8.98608	4.64342	4.16764	1.55515	14.8748	7.97025	5.47596	1.62815	808.631	433.283	297.687	88.5106	13.2466	0.890543
Barrow County, Georgia	13013	2	69367	9.6573	7.08172	2.40497	0.429864	1.22909	0.634418	0.359673	0.026	27.5786	8.90883	6.48957	2.01849	26.3495	8.27441	6.1299	1.99249	36.0068	15.3561	8.53486	2.42236	519.076	221.375	123.039	34.9209	33.5844	0.932725
Bartow County, Georgia	13015	2	100157	218.671	38.786	13.0825	1.51767	204.578	28.498	11.2504	1.51767	39.8199	12.8632	9.3701	2.91444	-164.758	-15.6348	-1.88025	1.39677	53.913	23.1512	11.2022	2.91444	538.285	231.149	111.846	29.0987	50.9985	0.945942
Ben Hill County, Georgia	13017	5	17634	8.61097	6.39914	3.9923	1.22159	5.47457	4.10957	3.58457	1.22159	12.2859	6.19123	4.99219	1.5608	6.8113	2.08166	1.40762	0.339204	15.4223	8.48081	5.39993	1.5608	874.576	480.935	306.222	88.5106	13.8615	0.898796
Berrien County, Georgia	13019	6	19286	8.03716	6.49512	4.86003	1.60389	5.93701	4.96201	4.58701	1.60389	13.4368	6.77125	5.45988	1.70701	7.49984	1.80924	0.872867	0.103121	15.537	8.30435	5.7329	1.70701	805.61	430.59	297.257	88.5106	13.83	0.890132
Bibb County, Georgia	13021	4	155547	60.9098	31.2733	7.68969	0.338293	37.9463	14.51	4.70444	0.338293	108.372	54.612	44.0354	13.7676	70.4256	40.102	39.331	13.4293	131.335	71.3753	47.0207	13.7676	844.345	458.867	302.292	88.5106	117.568	0.895173
Bleckley County, Georgia	13023	6	13063	12.2397	11.3318	10.2696	3.67133	10.8028	10.2828	10.0828	3.67133	9.10119	4.58637	3.69814	1.15621	-1.70161	-5.69642	-6.38465	-2.51512	10.5381	5.63534	3.88494	1.15621	806.716	431.397	297.401	88.5106	9.38192	0.890283
Brantley County, Georgia	13025	4	18411	4.01213	2.41097	0.883394	0.159366	2.1745	1.0695	0.644503	0.159366	12.8265	6.46369	5.21188	1.62948	10.652	5.39418	4.56738	1.47011	14.6642	7.80515	5.45077	1.62948	796.489	423.94	296.061	88.5058	13.0347	0.88888
Brooks County, Georgia	13027	4	16243	12.9952	11.5278	10.0585	3.42183	11.1714	10.1964	9.82142	3.42183	11.3167	5.70286	4.5984	1.43768	0.145321	-4.49356	-5.22302	-1.98415	13.1406	7.03424	4.8355	1.43768	808.998	433.063	297.697	88.5106	11.7029	0.890592
Bryan County, Georgia	13029	3	30233	4.77525	3.41905	1.12193	0.0857854	1.1	0.71	0.56	0.05	20.8266	6.08141	2.20427	0.610489	19.7266	5.37141	1.64427	0.560489	24.5019	8.79046	2.7662	0.646274	810.434	290.757	91.496	21.3764	23.8556	0.973623
Bulloch County, Georgia	13031	5	70217	14.5042	9.92017	4.75002	1.17191	7.63732	4.90732	3.85732	1.17191	48.9212	24.6529	19.8785	6.21495	41.2839	19.7456	16.0212	5.04304	55.7882	29.6658	20.7712	6.21495	794.511	422.487	295.814	88.5106	49.5732	0.888597
Burke County, Georgia	13033	3	23316	297.304	12.2665	10.0914	3.50117	294.679	10.3501	9.75013	3.50117	16.2446	8.18617	6.60077	2.06371	-278.434	-2.16397	-3.14936	-1.43746	18.8698	10.1025	6.94205	2.06371	809.307	433.288	297.737	88.5106	16.8061	0.890634
Butts County, Georgia	13035	2	23655	4.41976	2.51011	0.77476	0.101132	2.40252	1.03752	0.512518	0.101132	9.40463	3.03802	2.21302	0.688331	7.00211	2.0005	1.70051	0.587199	11.4219	4.51061	2.47527	0.688331	482.852	190.683	104.64	29.0987	10.7335	0.939736
Calhoun County, Georgia	13037	6	6694	38.7908	38.1768	37.5178	13.7513	37.948	37.558	37.408	13.7513	4.66381	2.35024	1.89508	0.59249	-33.2842	-35.2077	-35.5129	-13.1588	5.50663	2.96909	2.00492	0.59249	822.622	443.545	299.51	88.5106	4.91414	0.892404
Camden County, Georgia	13039	5	50513	10.0426	6.3606	2.1201	0.388527	3.3	1.155	0.33	0	35.1932	17.7349	14.3003	4.47093	31.8932	16.5799	13.9703	4.47093	41.9357	22.9405	16.0904	4.85946	830.197	454.151	318.539	96.2022	37.0763	0.884121
Candler County, Georgia	13043	6	10998	3.5577	2.8618	2.03201	0.656249	2.42473	2.03473	1.88473	0.656249	7.66247	3.86136	3.11354	0.973439	5.23774	1.82663	1.22881	0.31719	8.79545	4.68843	3.26083	0.973439	799.731	426.298	296.493	88.5106	7.82201	0.889325
Carroll County, Georgia	13045	2	110527	22.9257	14.202	4.54838	0.465742	10.4354	5.08408	2.92464	0.465742	43.9777	14.2063	10.3485	3.21876	33.5424	9.12225	7.42386	2.75301	56.468	23.3243	11.9722	3.21876	510.898	211.028	108.32	29.1219	53.2493	0.942999
Catoosa County, Georgia	13047	3	63942	9.7147	7.3469	2.65408	0.538332	2.18458	1.8499	1.67516	0.538332	44.548	22.4491	18.1014	5.65937	42.3634	20.5992	16.4263	5.12103	52.0781	27.9461	19.0804	5.65937	814.458	437.054	298.401	88.5078	46.4187	0.891329
Charlton County, Georgia	13049	6	12171	2.44274	1.50078	0.329186	0.004	0.84	0.32	0.12	0.004	8.47972	4.2732	3.44562	1.07726	7.63972	3.9532	3.32562	1.07326	10.0825	5.45397	3.6548	1.07726	828.4	448.112	300.288	88.5106	9.0052	0.893155
Chatham County, Georgia	13051	3	265128	111.425	48.0249	12.5099	0.630055	80.6003	25.501	8.50101	0.630055	182.612	53.3231	19.3275	5.35289	102.012	27.8221	10.8265	4.72284	213.437	75.847	23.3364	5.35289	805.034	286.077	88.0195	20.1898	208.084	0.974921
Chattahoochee County, Georgia	13053	3	11267	2.00206	1.1575	0.236267	0	0.8	0.28	0.08	0	7.84989	3.9558	3.18969	0.997249	7.04989	3.6758	3.10969	0.997249	9.05195	4.83331	3.34596	0.997249	803.404	428.979	296.97	88.5106	8.0547	0.88983
Chattooga County, Georgia	13055	5	26015	15.5059	8.06248	3.69364	0.228	12.48	5.85	3.3	0.228	18.125	9.13377	7.36486	2.3026	5.64504	3.28377	4.06486	2.0746	21.1509	11.3463	7.7585	2.3026	813.028	436.143	298.232	88.5106	18.8483	0.891135
Cherokee County, Georgia	13057	2	214346	34.4078	23.6665	7.38484	1.25193	6.78818	2.60884	0.909345	0.025	85.2185	27.5285	20.053	6.2372	78.4304	24.9197	19.1436	6.2122	112.838	48.5862	26.5285	7.46412	526.43	226.672	123.765	34.8228	105.374	0.933851
Clarke County, Georgia	13059	4	116714	22.4559	13.3258	4.1449	0.6318	9.33	3.285	0.96	0.003	81.3115	40.9754	33.0398	10.3298	71.9815	37.6904	32.0798	10.3268	94.4374	51.0162	36.2247	10.9586	809.136	437.104	310.372	93.8928	83.4788	0.883959
Clay County, Georgia	13061	6	3183	6.79006	6.53322	6.20136	2.23481	6.32029	6.19029	6.14029	2.23481	2.21764	1.11754	0.901109	0.281729	-4.10264	-5.07275	-5.23918	-1.95308	2.68741	1.46047	0.962179	0.281729	844.302	458.835	302.287	88.5105	2.40568	0.895167
Clayton County, Georgia	13063	2	259424	24.2064	17.7418	3.34845	0.0827952	0.469236	0.353943	0.070293	0.001	103.14	33.3178	24.2701	7.54888	102.671	32.9639	24.1998	7.54788	126.877	50.7056	27.5483	7.63068	489.073	195.455	106.19	29.4139	119.247	0.939858
Clinch County, Georgia	13065	6	6798	4.97609	4.38465	3.78698	1.3404	4.22999	3.83999	3.68999	1.3404	4.73627	2.38675	1.92452	0.601695	0.50628	-1.45324	-1.76547	-0.738701	5.48237	2.93141	2.02151	0.601695	806.469	431.217	297.369	88.5106	4.88068	0.890249
Cobb County, Georgia	13067	2	688078	187.452	50.23	11.6539	1.06631	125.484	4.25833	1.23004	0.0592067	273.562	88.3699	64.3724	20.0221	148.078	84.1115	63.1423	19.9629	335.53	134.341	74.7963	21.0292	487.633	195.242	108.703	30.5623	314.5	0.937325
Coffee County, Georgia	13069	5	42356	15.2277	11.0972	7.05431	1.99707	10.2813	7.48628	6.41128	1.99707	29.5101	14.871	11.991	3.74895	19.2288	7.38476	5.57973	1.75188	34.4565	18.4819	12.634	3.74895	813.497	436.347	298.282	88.5106	30.7075	0.891197
Colquitt County, Georgia	13071	5	45498	35.6382	30.1762	25.683	8.79096	30.8161	26.6561	25.0561	8.79096	31.6991	15.9742	12.8805	4.02705	0.883031	-10.6819	-12.1756	-4.76391	36.5212	19.4943	13.5074	4.02705	802.699	428.465	296.878	88.5106	32.4941	0.889734
Columbia County, Georgia	13073	3	124053	28.9142	18.3531	4.78943	0.548206	8.54828	3.09061	0.867687	0.00631284	86.4296	43.5546	35.1195	10.98	77.8813	40.464	34.2518	10.9737	106.795	58.8171	39.0412	11.5219	860.886	474.129	314.714	92.8788	95.2736	0.892113
Cook County, Georgia	13075	6	17212	12.6871	10.9184	8.9001	3.04742	10.3797	9.23405	8.60014	3.04742	11.9919	6.04307	4.87273	1.52344	1.61219	-3.19098	-3.72741	-1.52398	14.2993	7.72747	5.17269	1.52344	830.773	448.958	300.528	88.5106	12.7758	0.89346
Coweta County, Georgia	13077	2	127317	51.6676	11.7255	4.18489	0.906967	37.464	0.715272	0.270883	0.0276686	50.618	16.3514	11.911	3.70476	13.154	15.6361	11.6402	3.67709	64.8216	27.3616	15.825	4.58406	509.136	214.91	124.296	36.0051	60.2376	0.929282
Crawford County, Georgia	13079	4	12630	5.69373	4.61762	3.20038	0.975757	4.39495	3.66951	3.03154	0.975757	8.79951	4.43435	3.57556	1.11789	4.40456	0.764834	0.544021	0.142132	10.0983	5.38245	3.7444	1.11789	799.547	426.164	296.469	88.5106	8.9804	0.889299
Crisp County, Georgia	13081	5	23439	29.6563	25.9858	23.4429	8.36333	27.3766	24.3216	23.1466	8.36333	16.3303	8.22935	6.63559	2.0746	-11.0463	-16.0922	-16.511	-6.28873	18.6101	9.89358	6.93196	2.0746	793.979	422.099	295.745	88.5106	16.5355	0.888523
Dade County, Georgia	13083	3	16633	3.24015	2.02311	0.513019	0.014	1.14	0.49	0.24	0.014	11.5885	5.83979	4.70881	1.4722	10.4485	5.34979	4.46881	1.4582	13.6886	7.37289	4.98183	1.4722	822.979	443.269	299.515	88.5106	12.2164	0.892451
Dawson County, Georgia	13085	2	22330	4.04243	2.87705	1.24287	0.20459	1.21	0.69	0.49	0.041	8.88142	2.86901	2.08991	0.650037	7.67142	2.17901	1.59991	0.609037	11.7139	5.05606	2.84278	0.813627	524.579	226.425	127.308	36.4365	10.9002	0.930541
Decatur County, Georgia	13087	5	27842	102.92	100.769	97.2139	35.5967	98.4983	97.5411	96.6391	35.5967	19.3979	9.77523	7.88209	2.46431	-79.1003	-87.7659	-88.7571	-33.1324	23.8194	13.0029	8.45687	2.46431	855.52	467.024	303.745	88.5106	21.3551	0.896542
DeKalb County, Georgia	13089	2	691890	57.5191	42.9155	10.271	1.18603	0.46977	0.404002	0.0657677	0	275.079	88.8601	64.7295	20.1332	274.609	88.4561	64.6637	20.1332	332.128	131.372	74.9347	21.3192	480.031	189.874	108.304	30.813	310.809	0.93581
Dodge County, Georgia	13091	6	21796	20.055	18.1245	16.2235	5.48158	17.72	16.42	15.92	5.48158	15.1863	7.65285	6.17074	1.92926	-2.53366	-8.76711	-9.74921	-3.55232	17.5213	9.35742	6.4743	1.92926	803.878	429.318	297.041	88.5146	15.5921	0.889891
Dooly County, Georgia	13093	6	14918	41.2446	38.7223	36.8198	13.367	39.3655	37.3505	36.5755	13.367	10.3936	5.23766	4.22329	1.3204	-28.9719	-32.1129	-32.3522	-12.0466	12.2727	6.60938	4.46757	1.3204	822.675	443.047	299.475	88.5105	10.9523	0.892411
Dougherty County, Georgia	13095	4	94565	45.2845	36.3238	26.1255	8.69888	31.5369	26.288	24.3383	8.69889	65.8849	33.2014	26.7714	8.37	34.348	6.9134	2.43311	-0.328884	79.6325	43.2372	28.5586	8.37	842.093	457.222	302	88.5106	71.2625	0.894892
Douglas County, Georgia	13097	2	132403	32.2116	18.1274	6.59586	0.557732	19.6521	8.73524	4.2419	0.251	52.6051	16.9933	12.3786	3.8502	32.953	8.25803	8.13672	3.5992	65.1645	26.3855	14.7326	4.15693	492.168	199.282	111.271	31.396	61.0076	0.936209
Early County, Georgia	13099	6	11008	202.693	103.196	64.1264	17.9319	201.076	102.016	63.9163	17.9319	7.66665	3.86347	3.11524	0.97397	-193.41	-98.1528	-60.801	-16.9579	9.28321	5.04355	3.32539	0.97397	843.315	458.172	302.089	88.4784	8.30924	0.895083
Echols County, Georgia	13101	4	4034	2.47106	2.09915	1.75045	0.602127	2.05656	1.79656	1.69656	0.602127	2.81055	1.41632	1.14203	0.357052	0.753989	-0.380237	-0.554532	-0.245076	3.22505	1.71891	1.19591	0.357052	799.467	426.106	296.458	88.5106	2.868	0.889288
Effingham County, Georgia	13103	3	52250	148.203	28.6677	8.06129	0.165845	142.524	24.5223	7.32306	0.165845	35.9875	10.5084	3.80889	1.0549	-106.537	-14.0139	-3.51418	0.889055	41.6662	14.6539	4.54712	1.0549	797.439	280.457	87.0262	20.1895	40.6113	0.974682
Elbert County, Georgia	13105	6	20166	11.3641	3.79524	1.68122	0.291966	9.02935	2.0873	1.37743	0.291966	14.05	7.08021	5.70901	1.7849	5.02061	4.99291	4.33158	1.49294	16.3847	8.78816	6.0128	1.7849	812.493	435.791	298.165	88.5106	14.5998	0.891063
Emanuel County, Georgia	13107	6	22598	10.2859	7.49864	5.0076	1.45474	7.42579	5.41079	4.63579	1.45474	15.7444	7.93408	6.39751	2.00016	8.31858	2.52329	1.76172	0.545419	18.6044	10.0219	6.76932	2.00016	823.278	443.487	299.554	88.5106	16.6043	0.89249
Evans County, Georgia	13109	6	11000	7.66044	5.34278	3.7588	1.16724	6.32022	4.36442	3.58457	1.16724	7.66456	3.86241	3.11439	0.973705	1.34434	-0.502004	-0.470183	-0.19354	9.00479	4.84078	3.28862	0.973705	818.617	440.071	298.965	88.5186	8.03108	0.891868
Fannin County, Georgia	13111	6	23682	14.1832	11.8315	9.49929	0.89731	11.1435	9.60509	9.08009	0.887085	16.5087	8.31923	6.70807	2.09726	5.36516	-1.28585	-2.37202	1.21017	19.5483	10.5457	7.12727	2.10748	825.452	445.303	300.957	88.9909	17.4409	0.892191
Fayette County, Georgia	13113	2	106567	19.2533	12.2919	3.40931	0.447761	5.87873	2.2039	0.624822	0.003	42.3683	13.6864	9.96979	3.10096	36.4896	11.4825	9.34496	3.09796	55.7429	23.7744	12.7543	3.54573	523.079	223.094	119.683	33.2723	52.1972	0.936391
Floyd County, Georgia	13115	4	96317	81.182	27.6196	9.65744	1.13122	70.3497	19.712	8.24924	1.13122	67.1055	33.8166	27.2674	8.52507	-3.24416	14.1046	19.0182	7.39385	77.9378	41.7242	28.6756	8.52507	809.18	433.196	297.721	88.5106	69.4128	0.890617
Forsyth County, Georgia	13117	2	175511	39.4359	26.9645	13.3962	1.22019	21.1978	13.4343	10.328	0.923683	69.7787	22.5409	16.4198	5.10715	48.5809	9.10661	6.09176	4.18347	88.0168	36.0711	19.4879	5.40366	501.489	205.521	111.035	30.7881	82.6132	0.938607
Franklin County, Georgia	13119	6	22084	7.55404	5.10143	2.87619	0.383712	4.9703	3.2153	2.5403	0.383712	15.3863	7.75361	6.25199	1.95467	10.416	4.53831	3.71169	1.57095	17.97	9.63974	6.58788	1.95467	813.711	436.503	298.31	88.5106	16.0153	0.891226
Fulton County, Georgia	13121	1	920581	293.473	152.487	37.7348	1.91897	166.621	58.4941	16.7604	0.0121192	366	118.231	86.1244	26.7878	199.379	59.7368	69.364	26.7757	492.852	212.224	107.099	28.6946	535.371	230.533	116.338	31.1702	464.157	0.941778
Gilmer County, Georgia	13123	6	28292	10.9617	5.8156	2.46256	0.265703	7.86672	3.43318	1.66354	0.097	19.6996	9.92725	8.00467	2.50264	11.8329	6.49408	6.34113	2.40564	22.7946	12.3097	8.80369	2.67134	805.69	435.094	311.172	94.4203	20.1232	0.882808
Glascock County, Georgia	13125	6	3082	0.739235	0.462164	0.204783	0.0284488	0.38	0.185	0.11	0.008	2.14728	1.08208	0.872516	0.27279	1.76728	0.897079	0.762516	0.26479	2.50651	1.35924	0.967299	0.293238	813.275	441.026	313.854	95.1455	2.21327	0.883009
Glynn County, Georgia	13127	4	79626	79.4254	35.4303	13.3878	1.86185	69.0628	27.8656	12.0406	1.86185	55.4766	27.9564	22.5422	7.04774	-13.5862	0.0907862	10.5015	5.1859	65.8392	35.5211	23.8893	7.04774	826.856	446.099	300.019	88.5106	58.7915	0.892955
Gordon County, Georgia	13129	5	55186	19.6383	11.7738	5.04718	0.862381	12.1772	6.32725	4.07725	0.862381	38.4489	19.3756	15.6232	4.88454	26.2717	13.0484	11.5459	4.02216	45.91	24.8222	16.5931	4.88454	831.913	449.791	300.676	88.5106	41.0254	0.893606
Grady County, Georgia	13131	6	25011	15.011	12.8769	10.404	3.27611	11.6811	10.4461	9.97112	3.27611	17.4262	8.78163	7.08091	2.21383	5.74512	-1.66449	-2.89021	-1.06229	20.7561	11.2124	7.51379	2.21383	829.878	448.299	300.419	88.5141	18.5422	0.893341
Greene County, Georgia	13133	6	15994	6.53998	5.34579	3.48293	1.01743	1.22053	0.750055	0.495474	0.041	11.1433	5.61544	4.52791	1.41564	9.92273	4.86538	4.03244	1.37464	16.4627	10.2112	7.51537	2.39207	1029.31	638.437	469.887	149.56	14.0706	0.854698
Gwinnett County, Georgia	13135	2	805321	96.8778	67.3509	14.5292	0.956981	11.4627	4.3003	1.17737	0.001	320.175	103.428	75.3411	23.4338	308.713	99.1274	74.1638	23.4328	405.59	166.478	88.6929	24.3898	503.638	206.723	110.134	30.2858	381.201	0.939866
Habersham County, Georgia	13137	5	43041	20.6107	13.7548	9.05488	0.999606	14.8353	9.53876	8.30408	0.999606	29.9873	15.1115	12.1849	3.80958	15.152	5.57278	3.88086	2.80998	35.7627	19.3276	12.9357	3.80958	830.899	449.051	300.544	88.5106	31.9531	0.893476
Hall County, Georgia	13139	4	179684	141.381	58.5132	18.299	0.917371	123.046	44.6177	14.2687	0.217	71.4378	23.0769	16.8102	5.22858	-51.6086	-21.5408	2.54149	5.01158	89.7726	36.9724	20.8405	5.92895	499.614	205.763	115.984	32.9965	83.8437	0.933956
Hancock County, Georgia	13141	5	9429	3.71486	2.2806	1.25731	0.339383	1.83578	0.666385	0.231696	0.00709001	6.55052	3.30101	2.66171	0.832176	4.71473	2.63462	2.43002	0.825086	8.42959	4.91522	3.68733	1.16447	894.007	521.288	391.063	123.499	7.26513	0.861859
Haralson County, Georgia	13143	2	28780	5.99312	3.96725	1.73476	0.198468	2.76	1.525	1.05	0.086	11.4422	3.69623	2.69249	0.837461	8.6822	2.17123	1.64249	0.751461	14.6753	6.13847	3.37725	0.94993	509.914	213.29	117.347	33.0066	13.7254	0.93527
Harris County, Georgia	13145	3	32024	10.4321	5.33831	1.47028	0.109244	6.54962	2.42947	0.725147	0.007	22.313	11.2442	9.06658	2.83464	15.7634	8.81474	8.34143	2.82764	26.1955	14.1531	9.81172	2.93688	817.996	441.952	306.386	91.7088	23.2586	0.887886
Hart County, Georgia	13147	6	25213	11.09	5.52431	3.22602	0.685401	7.88451	3.18431	2.80931	0.685401	17.5663	8.8522	7.13781	2.23162	9.68177	5.66788	4.3285	1.54622	20.7718	11.1922	7.55453	2.23162	823.851	443.906	299.628	88.5106	18.5401	0.892565
Heard County, Georgia	13149	2	11834	113.293	1.70706	0.585958	0.0763026	112.049	0.799303	0.424303	0.0763026	4.7049	1.51985	1.10712	0.344354	-107.344	0.720543	0.682817	0.268052	5.94841	2.42761	1.26878	0.344354	502.654	205.138	107.214	29.0987	5.60405	0.94211
Henry County, Georgia	13151	2	203922	64.246	33.1589	10.9472	1.35211	42.2497	17.1017	8.08766	1.35211	81.0746	26.1899	19.0778	5.9339	38.8249	9.08821	10.9902	4.58179	103.071	42.2472	21.9374	5.9339	505.443	207.173	107.577	29.0989	97.1369	0.942429
Houston County, Georgia	13153	4	139900	47.6259	30.896	13.8097	3.43731	27.177	15.9683	11.1513	3.43731	97.4781	49.1223	39.6089	12.3836	70.3011	33.154	28.4576	8.94629	117.927	64.0499	42.2672	12.3836	842.938	457.827	302.125	88.5175	105.543	0.894989
Irwin County, Georgia	13155	6	9538	12.7513	11.9015	11.0879	3.97073	11.7704	11.1854	10.9604	3.97073	6.64527	3.34876	2.70021	0.844214	-5.12508	-7.83659	-8.26014	-3.12652	7.62626	4.06488	2.82774	0.844214	799.566	426.177	296.471	88.5105	6.78204	0.889302
Jackson County, Georgia	13157	5	60485	20.2679	13.5156	7.29836	0.721825	12.5444	7.71694	5.77741	0.502	42.1408	21.2361	17.1233	5.35356	29.5965	13.5191	11.3459	4.85156	49.8644	27.0347	18.6443	5.57339	824.409	446.965	308.246	92.1449	44.291	0.888229
Jasper County, Georgia	13159	2	13900	5.14725	3.46913	1.37198	0.260337	3.50306	2.26887	1.15823	0.260337	5.52629	1.78518	1.3004	0.404472	2.02323	-0.483686	0.142171	0.144136	7.17048	2.98544	1.51415	0.404472	515.862	214.78	108.931	29.0987	6.76601	0.943592
Jeff Davis County, Georgia	13161	6	15068	7.2993	5.96775	4.68097	1.37016	5.738	4.82801	4.47801	1.37016	10.4981	5.29032	4.26576	1.33368	4.7601	0.462317	-0.212245	-0.0364846	12.0594	6.43007	4.46873	1.33368	800.332	426.737	296.571	88.5106	10.7257	0.889408
Jefferson County, Georgia	13163	6	16930	24.383	18.7433	12.4226	3.72655	21.896	16.9278	12.0993	3.72655	11.7954	5.94406	4.79289	1.49848	-10.1006	-10.9837	-7.30637	-2.22807	14.2824	7.75958	5.1162	1.49848	843.615	458.333	302.198	88.5106	12.7839	0.895082
Jenkins County, Georgia	13165	6	8340	4.16365	3.5349	2.85434	0.931971	3.27938	2.88938	2.73938	0.931971	5.8106	2.92814	2.36106	0.738178	2.53122	0.0387623	-0.378324	-0.193793	6.69488	3.57366	2.47601	0.738178	802.743	428.497	296.884	88.5105	5.9567	0.88974
Johnson County, Georgia	13167	5	9980	3.43778	2.37799	1.45624	0.414864	2.40152	1.62152	1.32152	0.414864	6.95322	3.50394	2.82534	0.883335	4.55169	1.88242	1.50382	0.468472	7.98947	4.26041	2.96006	0.883335	800.548	426.895	296.599	88.5106	7.10614	0.889438
Jones County, Georgia	13169	4	28669	15.6627	7.82895	2.18664	0.152029	11.7526	4.87383	1.35376	0.014	19.9741	10.0656	8.11621	2.53751	8.22153	5.19175	6.76245	2.52351	23.8843	13.0207	8.94908	2.67554	833.104	454.174	312.152	93.3252	21.2087	0.887979
Lamar County, Georgia	13171	2	18317	6.28533	4.66811	2.62707	0.716147	3.42526	2.58026	2.25526	0.716147	7.28237	2.35246	1.71363	0.533002	3.85711	-0.227802	-0.54163	-0.183145	10.1424	4.44031	2.08544	0.533002	553.717	242.415	113.853	29.0987	9.60944	0.947448
Lanier County, Georgia	13173	4	10078	3.37465	2.53134	1.56202	0.47121	2.11732	1.59732	1.39732	0.47121	7.01871	3.53695	2.85195	0.891655	4.90138	1.93962	1.45463	0.420445	8.27603	4.47096	3.01665	0.891655	821.198	443.635	299.33	88.4754	7.38438	0.892261
Laurens County, Georgia	13175	5	48434	40.9861	21.613	11.2894	2.83893	35.1968	17.3868	10.5368	2.83893	33.7447	17.005	13.7117	4.28692	-1.45215	-0.381841	3.17485	1.44799	39.5339	21.2311	14.4643	4.28692	816.243	438.352	298.639	88.5106	35.247	0.891563
Lee County, Georgia	13177	4	28298	60.6808	58.7282	56.2607	20.5435	57.351	56.2974	55.8278	20.5435	19.7156	9.93533	8.01118	2.50467	-37.6353	-46.3621	-47.8166	-18.0388	23.0455	12.3661	8.44406	2.50467	814.385	436.996	298.398	88.5106	20.5408	0.891316
Liberty County, Georgia	13179	4	63453	23.9486	10.8642	2.62272	0.0112244	17.51	6.135	1.76	0.001	43.7146	12.7648	4.62672	1.2814	26.2046	6.62977	2.86672	1.2804	50.1533	17.494	5.48944	1.29163	790.4	275.7	86.5119	20.3557	48.8616	0.974246
Lincoln County, Georgia	13181	3	7996	2.82427	1.41552	0.434955	0.014	1.94	0.77	0.32	0.014	5.56954	2.80667	2.26311	0.707553	3.62954	2.03667	1.94311	0.693553	6.45381	3.45218	2.37806	0.707553	807.13	431.739	297.406	88.4884	5.74626	0.890367
Long County, Georgia	13183	4	14464	3.98137	2.65858	1.09671	0.242161	2.43389	1.52893	0.895535	0.242161	9.95114	2.90576	1.05322	0.291697	7.51725	1.37683	0.157686	0.0495361	11.4986	4.03541	1.25439	0.291697	794.982	278.997	86.7252	20.1671	11.2069	0.974632
Lowndes County, Georgia	13185	4	109233	41.8894	21.4741	6.68459	0.82384	27.9069	11.2669	4.86686	0.82384	76.1043	38.3513	30.9239	9.66827	48.1974	27.0845	26.0571	8.84443	90.0868	48.5586	32.7417	9.66827	824.722	444.541	299.741	88.5106	80.4186	0.892678
Lumpkin County, Georgia	13187	6	29966	6.63327	3.90863	1.29515	0.164142	3.55214	1.6594	0.894606	0.164142	20.8778	10.521	8.48339	2.65231	17.3256	8.86156	7.58878	2.48817	23.9589	12.7702	8.88394	2.65231	799.536	426.156	296.467	88.5106	21.3066	0.889298
McDuffie County, Georgia	13189	3	21875	10.3623	8.30554	6.36281	2.10989	8.04105	6.61105	6.06105	2.10989	15.2406	7.68023	6.19282	1.93617	7.19959	1.06918	0.131772	-0.173721	17.5619	9.37472	6.49458	1.93617	802.828	428.559	296.895	88.5106	15.6257	0.889751
McIntosh County, Georgia	13191	4	14333	2.54488	1.76102	0.616349	0.127805	0.5	0.175	0.05	0	9.98532	5.03192	4.0574	1.26853	9.48532	4.85692	4.0074	1.26853	12.0302	6.61794	4.62375	1.39634	839.336	461.727	322.594	97.4212	10.6339	0.883931
Macon County, Georgia	13193	6	14740	43.3257	33.0705	28.3173	9.59458	41.6953	31.8803	28.1053	9.59458	10.2696	5.17516	4.1729	1.30465	-31.4258	-26.7052	-23.9324	-8.28993	11.9	6.36534	4.38485	1.30465	807.324	431.841	297.48	88.5106	10.5953	0.890366
Madison County, Georgia	13195	4	28120	6.6122	4.40612	2.12018	0.264366	3.74489	2.31203	1.74736	0.264366	19.5916	9.87283	7.96079	2.48892	15.8467	7.5608	6.21343	2.22455	22.4589	11.9669	8.33361	2.48892	798.682	425.566	296.359	88.5106	19.97	0.889179
Marion County, Georgia	13197	3	8742	4.43762	3.70649	2.51028	0.775605	2.83488	2.44488	2.29488	0.775605	6.09068	3.06929	2.47487	0.773759	3.25581	0.624406	0.179986	-0.00184595	7.69343	4.33089	2.69027	0.773759	880.053	495.412	307.741	88.5106	6.91967	0.899426
Meriwether County, Georgia	13199	2	21992	3.74045	2.64007	1.03089	0.143356	1.35015	0.895152	0.720152	0.143356	8.74346	2.82444	2.05744	0.639939	7.39331	1.92929	1.33729	0.496583	11.1338	4.56936	2.36818	0.639939	506.264	207.774	107.684	29.0987	10.4938	0.942523
Miller County, Georgia	13201	6	6125	65.0788	64.5172	63.9859	23.541	64.4432	64.0532	63.9032	23.541	4.27017	2.15187	1.73512	0.542481	-60.1731	-61.9014	-62.1681	-22.9985	4.90574	2.61584	1.81775	0.542481	800.937	427.075	296.775	88.5684	4.36326	0.889419
Mitchell County, Georgia	13205	6	23498	94.1534	89.1583	85.9415	31.1721	91.542	87.252	85.602	31.1721	16.3714	8.25006	6.6523	2.07982	-75.1706	-79.002	-78.9497	-29.0922	18.9828	10.1564	6.99177	2.07982	807.846	432.222	297.548	88.5105	16.903	0.890436
Monroe County, Georgia	13207	4	26424	295.189	5.06156	1.99675	0.491924	291.652	2.47949	1.53693	0.491924	18.41	9.27737	7.48065	2.3388	-273.242	6.79788	5.94372	1.84688	21.9471	11.8594	7.94047	2.3388	830.574	448.813	300.502	88.5106	19.6083	0.893434
Montgomery County, Georgia	13209	5	9123	3.90068	3.22302	2.39986	0.517976	2.87824	2.47663	2.26695	0.517976	6.35613	3.20305	2.58273	0.807482	3.47789	0.726418	0.31578	0.289506	7.37857	3.94943	2.71564	0.807482	808.788	432.91	297.67	88.5106	6.57109	0.890564
Morgan County, Georgia	13211	2	17868	8.12228	6.38954	4.92789	1.19433	3.77	2.47	1.97	0.177	12.4489	6.27339	5.05844	1.58151	8.67891	3.80339	3.08844	1.40451	16.8012	10.1929	8.01633	2.59883	940.295	570.457	448.642	145.446	14.2023	0.845318
Murray County, Georgia	13213	4	39628	12.1581	3.95892	1.71535	0.204726	8.75921	1.39191	0.997015	0.0871458	27.6094	13.9133	11.2187	3.5075	18.8502	12.5213	10.2217	3.42035	31.0083	16.4803	11.937	3.62508	782.486	415.874	301.227	91.4777	27.3833	0.883094
Muscogee County, Georgia	13215	3	189890	56.5946	30.9891	7.42017	0.445733	27.2478	9.24139	2.5593	0.000971601	132.296	66.668	53.7566	16.8068	105.048	57.4266	51.1973	16.8059	161.643	88.4156	58.6174	17.2516	851.243	465.615	308.691	90.8504	144.391	0.893273
Newton County, Georgia	13217	2	99958	19.9749	10.9668	3.4341	0.4382	10.8282	3.98384	1.25935	0.019	39.7408	12.8376	9.35149	2.90865	28.9126	8.85381	8.09214	2.88965	48.8874	19.8206	11.5262	3.32785	489.08	198.289	115.311	33.2925	45.5596	0.931928
Oconee County, Georgia	13219	4	32808	12.6431	11.2187	9.12847	2.3631	9.53433	8.94933	8.72433	2.3631	22.8627	11.5212	9.28995	2.90447	13.3284	2.5719	0.56561	0.54137	25.9715	13.7906	9.69408	2.90447	791.62	420.344	295.479	88.5294	23.067	0.888167
Oglethorpe County, Georgia	13221	4	14899	4.20144	2.9722	1.79333	0.263478	2.77832	1.93332	1.60832	0.263478	10.3804	5.23099	4.21791	1.31872	7.60204	3.29767	2.6096	1.05524	11.8035	6.26987	4.40292	1.31872	792.233	420.825	295.518	88.5106	10.4848	0.888277
Paulding County, Georgia	13223	2	142324	14.97	10.9036	3.06812	0.449537	1.52636	0.772672	0.298691	0.015	56.5844	18.2787	13.315	4.14145	55.0581	17.5061	13.0163	4.12645	70.0281	28.4097	16.0844	4.57598	492.033	199.613	113.013	32.1519	65.4521	0.934655
Peach County, Georgia	13225	4	27695	15.4405	12.8962	10.3478	3.56409	12.2765	10.5865	9.93646	3.56409	19.2955	9.72362	7.84047	2.4513	7.01907	-0.862843	-2.09599	-1.11279	22.4596	12.0334	8.25179	2.4513	810.961	434.496	297.953	88.5106	20.0083	0.890857
Pickens County, Georgia	13227	2	29431	6.38204	4.38064	1.24213	0.0922342	1.86399	1.04143	0.522559	0.036	11.699	3.77919	2.75292	0.856259	9.83504	2.73776	2.23037	0.820259	16.2171	7.1184	3.4725	0.912494	551.021	241.868	117.988	31.0045	15.3046	0.943733
Pierce County, Georgia	13229	5	18758	6.87655	5.33824	3.71144	1.17958	4.79022	3.81522	3.44022	1.17958	13.069	6.58587	5.3104	1.66028	8.27876	2.77065	1.87018	0.4807	15.1553	8.10889	5.58162	1.66028	807.939	432.29	297.56	88.5106	13.495	0.890449
Pike County, Georgia	13231	2	17869	12.5234	6.48734	3.2266	0.731596	10.6305	5.10553	2.98053	0.731596	7.10426	2.29492	1.67172	0.519965	-3.52627	-2.81061	-1.30881	-0.21163	8.99716	3.67674	1.9178	0.519965	503.506	205.761	107.325	29.0987	8.47719	0.942208
Polk County, Georgia	13233	5	41475	14.7883	6.41153	2.24714	0.211885	9.57942	2.51204	1.25744	0.0789682	16.4894	5.32665	3.88016	1.20687	6.90999	2.81461	2.62271	1.1279	21.6983	9.22614	4.86985	1.33979	523.166	222.451	117.417	32.3035	20.3585	0.938254
Pulaski County, Georgia	13235	4	12010	25.5185	23.8044	22.3842	8.12628	23.9848	22.6848	22.1848	8.12628	8.35989	4.21281	3.39692	1.06204	-15.6249	-18.472	-18.7879	-7.06425	9.89354	5.33238	3.5963	1.06204	823.776	443.995	299.442	88.4295	8.83151	0.892653
Putnam County, Georgia	13237	6	21218	37.8451	3.82422	1.67916	0.28828	36.27	2.67439	1.47439	0.28828	14.7829	7.44956	6.00683	1.87802	-21.4871	4.77517	4.53243	1.58974	16.358	8.59939	6.21159	1.87802	770.95	405.288	292.751	88.5106	14.48	0.885193
Quitman County, Georgia	13239	6	2513	0.665571	0.58723	0.413139	0.130805	0.375419	0.375419	0.375419	0.130805	1.75084	0.882305	0.711431	0.222427	1.37543	0.506886	0.336012	0.0916219	2.041	1.09412	0.749151	0.222427	812.175	435.382	298.11	88.5105	1.81857	0.89102
Rabun County, Georgia	13241	6	16276	5.19956	3.00766	1.545	0.273078	3.48628	1.75696	1.32228	0.273078	11.3397	5.71445	4.60774	1.4406	7.85345	3.95748	3.28547	1.16752	13.053	6.96514	4.83047	1.4406	801.979	427.939	296.785	88.5106	11.6124	0.889635
Randolph County, Georgia	13243	6	7719	35.1041	34.364	33.6749	12.3693	34.2889	33.7689	33.5689	12.3693	5.37794	2.71011	2.18525	0.683213	-28.911	-31.0588	-31.3837	-11.6861	6.19313	3.3052	2.29123	0.683213	802.323	428.19	296.83	88.5105	5.50992	0.889682
Richmond County, Georgia	13245	3	200549	158.518	65.2315	17.7273	0.466098	137.89	50.1728	15.0456	0.466098	139.726	70.412	56.7755	17.7507	1.83568	20.2393	41.7299	17.2846	160.354	85.4708	59.4572	17.7507	799.575	426.184	296.472	88.5106	142.603	0.889303
Rockdale County, Georgia	13247	2	85215	20.3195	11.1922	3.2121	0.365966	10.33	3.635	1.06	0.003	33.8793	10.9442	7.97222	2.47965	23.5493	7.30919	6.91222	2.47665	43.8688	18.5014	10.1243	2.84261	514.802	217.114	118.809	33.3581	41.0262	0.935202
Schley County, Georgia	13249	5	5010	1.43679	1.21138	0.829906	0.223488	0.84267	0.77767	0.75267	0.223488	3.49054	1.75899	1.41833	0.443438	2.64787	0.981324	0.665664	0.21995	4.08466	2.1927	1.49557	0.443438	815.302	437.665	298.517	88.5106	3.64123	0.891438
Screven County, Georgia	13251	6	14593	10.8501	7.70224	5.72375	1.84205	9.30258	6.57258	5.52258	1.84205	10.1672	5.12355	4.13129	1.29163	0.864583	-1.44903	-1.39129	-0.55042	11.7146	6.25321	4.33246	1.29163	802.757	428.507	296.886	88.5106	10.423	0.889742
Seminole County, Georgia	13253	6	8729	63.5557	62.7873	61.916	22.8002	62.3951	61.9401	61.7651	22.8002	6.08163	3.06472	2.47118	0.772609	-56.3135	-58.8754	-59.2939	-22.0276	7.24223	3.91196	2.62206	0.772609	829.675	448.157	300.385	88.5106	6.46962	0.893319
Spalding County, Georgia	13255	2	64073	9.44959	6.31735	1.70052	0.217712	2.72085	1.40537	0.82578	0.217712	25.4738	8.22892	5.9943	1.86444	22.753	6.82355	5.16852	1.64673	32.2025	13.1409	6.86903	1.86444	502.592	205.093	107.206	29.0987	30.3381	0.942103
Stephens County, Georgia	13257	5	26175	8.75144	6.27407	3.99668	1.19589	2.82405	1.09279	0.473413	0.0252009	18.2365	9.18995	7.41016	2.31676	15.4125	8.09716	6.93674	2.29156	24.1639	14.3712	10.9334	3.48746	923.167	549.044	417.705	133.236	20.6764	0.855675
Stewart County, Georgia	13259	6	6058	2.30908	1.89986	1.46826	0.493771	1.75641	1.49641	1.39641	0.493771	4.2207	2.12694	1.71502	0.536197	2.46429	0.630534	0.318615	0.0424258	4.77337	2.53039	1.78687	0.536197	787.945	417.694	294.96	88.5105	4.23717	0.887669
Sumter County, Georgia	13261	5	32819	59.3657	56.116	51.6934	18.53	55.9392	53.6147	51.248	18.53	22.8641	11.5219	9.29051	2.90465	-33.0751	-42.0927	-41.9575	-15.6254	26.2907	14.0233	9.73596	2.90465	801.08	427.293	296.656	88.5052	23.386	0.889518
Talbot County, Georgia	13263	6	6865	10.418	2.62925	0.875926	0.0491576	9.61668	2.04052	0.759728	0.0440454	4.78156	2.40958	1.94292	0.607448	-4.83512	0.369052	1.18319	0.563403	5.58292	2.9983	2.05912	0.61256	813.245	436.752	299.944	89.2295	4.97036	0.89028
Taliaferro County, Georgia	13265	6	1717	0.279618	0.166121	0.0333503	0	0.1	0.035	0.01	0	1.19626	0.602833	0.486084	0.151973	1.09626	0.567833	0.476084	0.151973	1.37588	0.733954	0.509434	0.151973	801.327	427.463	296.7	88.5106	1.22391	0.889545
Tattnall County, Georgia	13267	6	25520	14.1439	11.7896	9.53805	2.68797	11.4359	9.81086	9.18586	2.68797	17.7795	8.95963	7.22444	2.2587	6.34362	-0.851227	-1.96141	-0.429266	20.4876	10.9383	7.57663	2.2587	802.804	428.618	296.89	88.5071	18.2289	0.889753
Taylor County, Georgia	13269	6	8906	8.76929	7.54851	4.76864	1.23768	7.47052	6.60041	4.5998	1.23768	6.20495	3.12686	2.52129	0.788275	-1.26558	-3.47354	-2.07851	-0.449409	7.50371	4.07496	2.69013	0.788275	842.546	457.553	302.059	88.5106	6.71544	0.894949
Telfair County, Georgia	13271	6	16500	9.53448	7.81609	6.14746	2.08866	7.50342	6.33342	5.88342	2.08866	11.4958	5.79309	4.67116	1.46042	3.99238	-0.540326	-1.21226	-0.62824	13.5269	7.27577	4.9352	1.46042	819.81	440.956	299.103	88.5106	12.0664	0.892035
Terrell County, Georgia	13273	4	9315	36.2546	34.8736	33.8351	12.3475	35.2322	34.1272	33.7022	12.3475	6.4899	3.27046	2.63708	0.824476	-28.7423	-30.8567	-31.0651	-11.523	7.51234	4.01684	2.77	0.824476	806.478	431.223	297.37	88.5106	6.68786	0.89025
Thomas County, Georgia	13275	5	44720	16.7698	11.478	6.05876	1.60944	11.8787	7.90751	5.42292	1.60944	31.1564	15.7007	12.66	3.9581	19.2777	7.79317	7.23706	2.34866	36.0475	19.2712	13.2958	3.9581	806.072	430.93	297.313	88.5086	32.0894	0.890198
Tift County, Georgia	13277	5	40118	25.1278	20.9881	16.2082	5.51061	18.703	16.298	15.373	5.51061	27.9536	14.0867	11.3586	3.55122	9.2506	-2.21132	-4.01445	-1.95939	34.3784	18.7768	12.1938	3.55122	856.932	468.039	303.948	88.5194	30.8272	0.896702
Toombs County, Georgia	13279	5	27223	15.7639	13.1968	10.5639	3.60265	12.4755	10.7855	10.1355	3.60265	18.9667	9.5579	7.70685	2.40952	6.49113	-1.22764	-2.4287	-1.19313	22.2551	11.9692	8.13517	2.40952	817.51	439.672	298.834	88.5106	19.8455	0.891731
Towns County, Georgia	13281	6	10471	6.27946	5.49582	4.46542	0.484907	4.59382	4.20188	4.04193	0.398	7.2953	3.67633	2.96435	0.926794	2.70149	-0.525551	-1.07759	0.528794	8.98095	4.97027	3.38783	1.0137	857.697	474.67	323.544	96.8104	7.96725	0.887128
Treutlen County, Georgia	13283	6	6885	3.44793	2.57783	1.83872	0.596015	2.63274	1.98274	1.73274	0.596015	4.79688	2.4173	1.94915	0.609395	2.16414	0.434556	0.216404	0.0133803	5.61207	3.01239	2.05512	0.609395	815.116	437.529	298.493	88.5106	5.00268	0.891414
Troup County, Georgia	13285	5	67044	19.3308	9.39155	2.32169	0.0810739	11.8422	3.87633	1.1919	0.0146153	26.655	8.61049	6.27224	1.9509	14.8128	4.73415	5.08035	1.93628	34.1437	14.1257	7.40204	2.01735	509.272	210.693	110.406	30.09	32.1263	0.940916
Turner County, Georgia	13287	6	8930	13.8119	13.3372	12.6404	4.42971	12.7757	12.5807	12.5057	4.42971	6.22167	3.13529	2.52809	0.790399	-6.55402	-9.4454	-9.9776	-3.63931	7.25792	3.89176	2.6628	0.790399	812.757	435.807	298.186	88.5106	6.46752	0.891098
Twiggs County, Georgia	13289	4	9023	9.81038	4.27098	1.61925	0.227825	8.81557	3.54477	1.48992	0.227825	6.28646	3.16794	2.55442	0.798631	-2.52911	-0.376826	1.06449	0.570806	7.28126	3.89415	2.68374	0.798631	806.967	431.58	297.433	88.5106	6.48263	0.890317
Union County, Georgia	13291	6	21356	11.6928	9.971	8.3641	0.940481	9.23346	8.03016	7.57558	0.741105	14.879	7.49802	6.0459	1.89023	5.64558	-0.532147	-1.52968	1.14913	17.3384	9.43886	6.83442	2.08961	811.876	441.977	320.023	97.8464	15.2488	0.879481
Upson County, Georgia	13293	5	27153	9.94235	5.20299	1.83773	0.213927	6.83359	2.93359	1.43359	0.213927	10.7953	3.48727	2.54028	0.790118	3.96176	0.553684	1.10669	0.576191	13.9041	5.75667	2.94442	0.790118	512.065	212.009	108.438	29.0987	13.114	0.943174
Walker County, Georgia	13295	3	68756	12.3556	8.09814	2.93705	0.169112	5.25382	2.91382	2.01382	0.169112	47.9033	24.14	19.4649	6.08563	42.6495	21.2262	17.451	5.91652	55.0052	29.3243	20.3881	6.08563	800.005	426.498	296.528	88.5106	48.9195	0.889363
Walton County, Georgia	13297	2	83768	12.4148	9.82506	5.3669	1.55055	5.45121	4.73621	4.46121	1.55055	33.304	10.7584	7.83684	2.43754	27.8528	6.02215	3.37564	0.886995	40.2677	15.8472	8.74253	2.43754	480.705	189.18	104.366	29.0987	37.8301	0.939467
Ware County, Georgia	13299	5	36312	8.52235	5.59868	2.68498	0.676586	4.91618	2.96618	2.21618	0.676586	25.2949	12.7469	10.2782	3.21346	20.3788	9.78073	8.06207	2.53688	28.9011	15.3794	10.7471	3.21346	795.911	423.535	295.964	88.4959	25.6876	0.888812
Warren County, Georgia	13301	6	5834	2.75251	2.05474	0.513796	0.018	2.11695	1.59077	0.431172	0.018	4.06464	2.0483	1.65161	0.516371	1.94769	0.457523	1.22044	0.498371	4.7002	2.51226	1.73423	0.516371	805.657	430.624	297.263	88.5106	4.18383	0.890139
Washington County, Georgia	13303	6	21187	34.8923	20.8447	13.2479	3.91972	32.5297	19.1199	12.9407	3.91972	14.7613	7.43868	5.99805	1.87527	-17.7684	-11.6813	-6.94266	-2.04445	17.124	9.16343	6.3052	1.87527	808.23	432.502	297.597	88.5106	15.2487	0.890488
Wayne County, Georgia	13305	5	30099	87.2624	32.7906	10.2838	0.56923	84.126	30.501	9.87603	0.56923	20.9704	10.5677	8.52104	2.66408	-63.1556	-19.9334	-1.35498	2.09485	24.1068	12.8572	8.92878	2.66408	800.918	427.165	296.647	88.5106	21.4427	0.889489
Webster County, Georgia	13307	6	2799	13.0045	12.7812	12.524	4.19675	12.6591	12.5291	12.4791	4.19675	1.9515	0.983421	0.792965	0.247918	-10.7076	-11.5456	-11.6861	-3.94883	2.29692	1.23558	0.837869	0.247918	820.621	441.435	299.346	88.5738	2.049	0.892065
Wheeler County, Georgia	13309	6	7421	4.51197	3.90933	3.2868	1.11823	3.72442	3.33442	3.18442	1.11823	5.17032	2.60549	2.10089	0.656837	1.4459	-0.728931	-1.08353	-0.461398	5.95788	3.1804	2.20327	0.656837	802.84	428.568	296.897	88.5106	5.30104	0.889753
White County, Georgia	13311	6	27144	5.39518	3.21183	1.10151	0.072561	2.83908	1.34408	0.769084	0.072561	18.9116	9.53016	7.68448	2.40253	16.0726	8.18608	6.9154	2.32997	21.4677	11.3979	8.01691	2.40253	790.883	419.905	295.348	88.5106	19.0652	0.888086
Whitfield County, Georgia	13313	4	102599	31.7034	16.1718	5.06906	0.39662	20.9402	8.09453	2.96062	0.095	71.4823	36.0221	29.0458	9.0811	50.5421	27.9276	26.0852	8.9861	82.2455	44.0994	31.1543	9.38271	801.621	429.823	303.651	91.4504	72.8628	0.885918
Wilcox County, Georgia	13315	6	9255	12.9655	12.2606	11.5302	3.98783	12.0398	11.5848	11.4098	3.98783	6.4481	3.2494	2.6201	0.819165	-5.59172	-8.33542	-8.78972	-3.16867	7.37382	3.92517	2.74044	0.819165	796.739	424.114	296.104	88.5106	6.55466	0.888909
Wilkes County, Georgia	13317	6	10593	3.17167	2.04847	0.985782	0.0998976	1.79	1.01	0.71	0.059	7.3817	3.71987	2.99945	0.937769	5.5917	2.70987	2.28945	0.878769	8.76337	4.75833	3.27523	0.978667	827.279	449.196	309.188	92.3881	7.7847	0.888323
Wilkinson County, Georgia	13319	6	9563	21.2526	8.92359	2.32607	0.028561	20.2025	8.15703	2.18956	0.028561	6.66269	3.35754	2.70729	0.846427	-13.5398	-4.7995	0.517727	0.817866	7.71276	4.12409	2.8438	0.846427	806.521	431.255	297.375	88.5106	6.86633	0.890256
Worth County, Georgia	13321	4	21679	27.519	25.2246	23.4641	8.42336	25.5432	23.7822	23.2072	8.42336	15.1041	7.61142	6.13734	1.91882	-10.4391	-16.1708	-17.0699	-6.50454	17.0799	9.05375	6.39419	1.91882	787.854	417.628	294.949	88.5106	15.1611	0.887656
Hawaii County, Hawaii	15001	5	185079	194.653	156.888	123.458	88.5613	157.593	129.803	118.638	88.5613	278.801	248.71	236.459	131.938	121.208	118.907	117.821	43.3766	315.861	275.795	241.279	131.938	1706.63	1490.15	1303.65	712.874	183.923	0.582292
Honolulu County, Hawaii	15003	3	953207	1105.42	262.704	137.367	42.0329	915.772	124.26	112.713	42.0329	981.744	169.168	140.822	53.8924	65.9727	44.9079	28.109	11.8595	1171.39	307.612	165.476	53.8924	1228.9	322.713	173.6	56.538	1117.5	0.953993
Kalawao County, Hawaii	15005	4	90	0.0138167	0.0100862	0.00179618	0	0	0	0	0	0.0986621	0.0840294	0.0780718	0.0272456	0.0986621	0.0840294	0.0780718	0.0272456	0.112479	0.0941156	0.079868	0.0272456	1249.77	1045.73	887.422	302.728	0.0852333	0.757772
Kauai County, Hawaii	15007	5	67091	86.4152	76.4146	65.8287	26.7919	73.0129	66.6255	64.086	26.7919	79.1303	68.2222	63.7811	25.8923	6.11732	1.59667	-0.304915	-0.899581	92.5325	78.0112	65.5238	25.8923	1379.21	1162.77	976.641	385.929	66.6402	0.720181
Maui County, Hawaii	15009	4	154834	384.611	350.383	321.748	152.423	353.261	327.362	317.262	152.376	227.628	202.455	192.205	104.765	-125.632	-124.907	-125.057	-47.611	258.979	225.476	196.69	104.812	1672.62	1456.25	1270.33	676.931	154.167	0.595288
Ada County, Idaho	16001	3	392365	1152.69	1114.16	1060.4	385.826	1076.58	1058.6	1050.51	385.826	5707.35	5647.59	5622.05	1851.29	4630.76	4588.99	4571.54	1465.46	5783.45	5703.15	5631.95	1851.29	14740	14535.3	14353.8	4718.28	3932.16	0.679899
Adams County, Idaho	16003	6	3976	108.326	107.753	107.197	38.5793	107.649	107.259	107.109	38.5793	57.8349	57.2294	56.9706	18.7599	-49.8138	-50.0294	-50.1382	-19.8195	58.512	57.7236	57.0586	18.7599	14716.3	14518	14350.8	4718.28	39.7521	0.679384
Bannock County, Idaho	16005	4	82839	234.709	223.642	208.724	70.6541	213.611	208.241	205.982	70.6541	1204.78	1192.36	1186.97	390.854	991.172	984.117	980.984	320.2	1225.88	1207.76	1189.71	390.854	14798.4	14579.6	14361.7	4718.24	835.027	0.681165
Bear Lake County, Idaho	16007	6	5986	244.896	244.068	242.788	89.5778	243.086	242.747	242.553	89.5778	87.0584	86.1606	85.7709	28.2434	-156.027	-156.587	-156.782	-61.3344	88.8684	87.4819	86.0062	28.2434	14846	14614.4	14367.9	4718.24	60.6251	0.682189
Benewah County, Idaho	16009	6	9285	3.62847	2.79705	2.10436	0.679698	3.0067	2.34316	2.02353	0.679698	135.046	133.652	133.047	43.8152	132.039	131.309	131.024	43.1355	135.668	134.106	133.128	43.8152	14611.5	14443.2	14338	4718.93	91.8525	0.67704
Bingham County, Idaho	16011	5	45607	1328.57	1317.56	1307.77	482.296	1317.77	1309.67	1306.36	482.296	663.293	656.452	653.484	215.185	-654.477	-653.217	-652.877	-267.112	674.098	664.34	654.888	215.185	14780.6	14566.6	14359.4	4718.24	458.913	0.680781
Blaine County, Idaho	16013	5	21376	151.058	146.227	139.58	49.5255	141.704	139.398	138.364	49.5255	310.965	307.709	306.317	100.867	169.261	168.311	167.953	51.3419	320.319	314.537	307.533	100.867	14985	14714.5	14386.9	4718.72	219.451	0.685103
Boise County, Idaho	16015	3	7028	10.41	9.15392	7.85899	2.76659	8.82105	7.97605	7.65105	2.76659	102.229	101.159	100.702	33.1601	93.4083	93.183	93.0506	30.3935	103.818	102.337	100.91	33.1601	14772.1	14561.3	14358.2	4718.28	70.6582	0.680595
Bonner County, Idaho	16017	5	40877	35.5759	25.8856	16.8775	3.53836	18.2773	11.3028	8.32993	0.85957	594.537	588.398	585.738	192.896	576.259	577.096	577.408	192.036	611.835	602.981	594.285	195.574	14967.7	14751.1	14538.4	4784.46	416.261	0.680348
Bonneville County, Idaho	16019	4	104234	994.847	974.676	949.769	327.842	961.686	950.469	945.458	327.842	1516.96	1501.32	1494.53	492.131	555.277	550.849	549.071	164.289	1550.12	1525.52	1498.84	492.131	14871.6	14635.6	14379.6	4721.41	1057.99	0.682521
Boundary County, Idaho	16021	6	10972	141.131	139.028	136.996	50.4204	2.50722	1.06171	0.511707	0.0397069	159.583	157.935	157.221	51.7761	157.075	156.873	156.709	51.7364	298.206	295.902	293.705	102.157	27178.8	26968.8	26768.6	9310.68	196.049	0.657429
Butte County, Idaho	16023	4	2891	222.494	221.934	221.286	81.7373	221.623	221.298	221.173	81.7373	42.0816	41.641	41.4527	13.65	-179.542	-179.657	-179.72	-68.0873	42.9521	42.2765	41.5659	13.65	14857.2	14623.5	14377.7	4721.55	29.3021	0.682204
Camas County, Idaho	16025	5	1117	227.697	227.604	227.397	84.0986	227.352	227.352	227.352	84.0986	16.2479	16.0778	16.0051	5.27032	-211.104	-211.274	-211.347	-78.8282	16.5933	16.3299	16.05	5.27032	14855.3	14619.5	14368.8	4718.28	11.323	0.682383
Canyon County, Idaho	16027	3	188923	1041.07	1022.44	1002.14	360.289	1015.56	1003.82	998.822	360.289	2748.08	2719.3	2707.01	891.392	1732.51	1715.48	1708.19	531.103	2773.58	2737.92	2710.32	891.392	14681	14492.3	14346.2	4718.28	1882.19	0.678613
Caribou County, Idaho	16029	6	6963	426.349	420.225	409.074	142.294	423.668	418.268	408.726	142.294	101.268	100.223	99.77	32.8531	-322.401	-318.045	-308.956	-109.441	103.948	102.18	100.118	32.8531	14928.6	14674.7	14378.6	4718.24	71.095	0.683947
Cassia County, Idaho	16031	5	22952	1126.32	1118.63	1111.88	408.917	1118.8	1113.14	1110.9	408.917	333.806	330.364	328.87	108.293	-784.992	-782.775	-782.034	-300.624	341.323	335.851	329.847	108.293	14871.2	14632.7	14371.2	4718.24	233.03	0.682725
Clark County, Idaho	16033	6	982	134.002	133.572	133.215	49.2066	133.615	133.29	133.165	49.2066	14.2819	14.1346	14.0707	4.63331	-119.333	-119.155	-119.094	-44.5733	14.6688	14.417	14.121	4.63331	14937.6	14681.3	14379.8	4718.24	10.0354	0.684137
Clearwater County, Idaho	16035	6	8761	96.8044	94.6713	92.9486	17.2552	94.497	92.9725	92.6475	17.2552	127.438	126.103	125.533	41.3369	32.9406	33.1309	32.8856	24.0816	129.745	127.802	125.834	41.3369	14809.4	14587.6	14363	4718.28	88.4081	0.681399
Custer County, Idaho	16037	6	4368	939.35	936.496	929.434	126.155	935.476	933.502	928.917	126.155	63.5079	62.843	62.5588	20.6	-871.968	-870.659	-866.358	-105.555	67.3816	65.8367	63.0752	20.6	15426.2	15072.5	14440.3	4716.12	46.7816	0.694278
Elmore County, Idaho	16039	5	27038	503	499.281	495.056	182.066	497.307	495.115	494.315	182.066	393.295	389.177	387.417	127.573	-104.012	-105.938	-106.897	-54.4935	398.988	393.344	388.158	127.573	14756.5	14547.8	14356	4718.28	271.415	0.680258
Franklin County, Idaho	16041	4	12786	311.465	308.521	305.167	112.248	307.016	305.262	304.587	112.248	185.955	184.038	183.205	60.3274	-121.061	-121.225	-121.382	-51.9204	190.404	187.296	183.785	60.3274	14891.6	14648.5	14373.9	4718.24	130.077	0.683162
Fremont County, Idaho	16043	5	13242	499.012	494.768	489.801	179.362	492.352	489.883	488.933	179.362	192.587	190.601	189.739	62.4789	-299.765	-299.282	-299.194	-116.883	199.247	195.486	190.607	62.4789	15046.6	14762.6	14394.1	4718.24	136.768	0.686425
Gem County, Idaho	16045	3	16719	648.898	646.706	644.343	238.036	645.969	644.567	643.963	238.036	243.195	240.649	239.56	78.885	-402.774	-403.919	-404.402	-159.152	246.124	242.787	239.941	78.885	14721.2	14521.6	14351.4	4718.28	167.239	0.679491
Gooding County, Idaho	16047	6	15464	1778.32	1772.59	1767.66	325.289	1772.61	1768.42	1766.92	325.289	224.94	222.584	221.578	72.9635	-1547.67	-1545.83	-1545.34	-252.325	230.646	226.755	222.32	72.9635	14915	14663.4	14376.6	4718.28	157.682	0.683656
Idaho County, Idaho	16049	6	16267	37.1467	33.1854	29.4792	3.65012	32.7806	29.9856	28.9106	3.65012	236.62	234.143	233.084	76.7523	203.839	204.157	204.173	73.1022	240.986	237.342	233.652	76.7523	14814.4	14590.4	14363.6	4718.28	164.234	0.681507
Jefferson County, Idaho	16051	4	26140	1951.11	1940.76	1930.48	712.707	1938.47	1931.51	1928.84	712.707	380.172	376.251	374.549	123.335	-1558.3	-1555.26	-1554.29	-589.373	392.814	385.499	376.194	123.335	15027.3	14747.5	14391.5	4718.24	269.479	0.686022
Jerome County, Idaho	16053	5	22374	1988.87	1982.95	1978.46	646.508	1984.38	1979.68	1977.88	646.508	325.452	322.045	320.589	105.567	-1658.93	-1657.63	-1657.29	-540.942	329.943	325.323	321.173	105.567	14746.7	14540.2	14354.7	4718.28	224.376	0.680045
Kootenai County, Idaho	16055	4	138494	82.0182	63.7402	44.1395	13.9728	57.1895	45.6152	40.9117	13.9728	2014.33	1993.53	1984.52	653.543	1957.14	1947.92	1943.61	639.57	2039.16	2011.66	1987.75	653.543	14723.8	14525.2	14352.6	4718.93	1385.62	0.679504
Latah County, Idaho	16057	5	37244	16.9807	11.7221	5.39424	1.36662	8.31762	5.39262	4.26762	1.36662	541.696	536.104	533.68	175.752	533.379	530.711	529.412	174.385	550.359	542.433	534.806	175.752	14777.1	14564.3	14359.5	4718.93	374.608	0.68066
Lemhi County, Idaho	16059	6	7936	373.381	370.879	368.283	123.835	370.162	368.529	367.865	123.835	115.437	114.229	113.712	37.4443	-254.725	-254.301	-254.153	-86.3905	118.656	116.579	114.131	37.4443	14951.7	14689.8	14381.4	4718.28	81.2122	0.684431
Lewis County, Idaho	16061	6	3821	2.44091	1.82335	1.16766	0.342293	0.7	0.31	0.16	0.01	55.5746	55.0009	54.7522	18.031	54.8746	54.6909	54.5922	18.021	57.3155	56.5142	55.7598	18.3633	15000.1	14790.4	14593	4805.89	38.9522	0.67961
Lincoln County, Idaho	16063	5	5208	389.746	386.845	385.058	141.587	388.392	385.857	384.882	141.587	75.7265	74.9337	74.5948	24.5634	-312.665	-310.923	-310.287	-117.024	77.0806	75.9221	74.7709	24.5634	14800.4	14578	14356.9	4716.47	52.5172	0.681329
Madison County, Idaho	16065	5	37536	667.681	659.764	653.218	240.95	660.828	654.762	652.327	240.95	545.911	540.281	537.838	177.104	-114.917	-114.481	-114.489	-63.8459	552.764	545.284	538.729	177.104	14726.2	14527	14352.3	4718.24	375.661	0.679603
Minidoka County, Idaho	16067	5	20069	870.856	865.982	862.563	318.397	868.023	863.914	862.195	318.397	291.924	288.868	287.561	94.6912	-576.099	-575.047	-574.634	-223.706	294.756	290.935	287.929	94.6912	14687.1	14496.7	14347	4718.28	200.065	0.678748
Nez Perce County, Idaho	16069	4	39265	178.401	169.098	158.504	16.3955	164.322	158.797	156.672	16.3955	571.091	565.195	562.639	185.289	406.769	406.398	405.967	168.893	585.17	575.496	564.471	185.289	14903.1	14656.7	14375.9	4718.93	399.881	0.683359
Oneida County, Idaho	16071	6	4286	245.441	244.377	243.069	89.7265	243.686	243.096	242.841	89.7265	62.3342	61.6913	61.4123	20.2224	-181.352	-181.404	-181.428	-69.5042	64.0889	62.9722	61.6404	20.2224	14953.1	14692.5	14381.8	4718.24	43.8665	0.684464
Owyhee County, Idaho	16073	3	11526	1124.19	1120.98	1118.01	317.44	1120.61	1118.37	1117.55	317.44	167.657	165.902	165.152	54.3829	-952.953	-952.466	-952.397	-263.057	171.236	168.514	165.617	54.3829	14856.5	14620.4	14369	4718.28	116.853	0.682409
Payette County, Idaho	16075	5	22623	336.25	332.291	328.941	120.899	332.52	329.555	328.455	120.899	329.074	325.629	324.157	106.742	-3.44531	-3.9258	-4.29828	-14.157	332.805	328.365	324.643	106.742	14710.9	14514.7	14350.1	4718.28	226.063	0.679267
Power County, Idaho	16077	6	7817	626.276	622.841	619.479	223.516	622.173	619.846	618.946	223.516	113.688	112.515	112.007	36.8825	-508.485	-507.33	-506.939	-186.633	117.791	115.511	112.54	36.8825	15068.6	14776.9	14396.8	4718.24	80.909	0.686883
Shoshone County, Idaho	16079	6	12765	4.56487	3.49917	1.59984	0.430425	1.4448	0.886928	0.182872	0.001	185.68	183.736	182.905	60.2289	184.235	182.849	182.722	60.2279	188.8	186.348	184.322	60.6583	14790.4	14598.4	14439.6	4751.92	128.142	0.678717
Teton County, Idaho	16081	5	10170	251.919	248.575	245.549	90.5007	248.424	246.02	245.095	90.5007	147.909	146.384	145.722	47.9845	-100.514	-99.6359	-99.3729	-42.5162	151.405	148.939	146.176	47.9845	14887.4	14644.9	14373.3	4718.24	103.42	0.683071
Twin Falls County, Idaho	16083	5	77230	2027.84	2009.18	1990.34	557.465	2005.65	1992.98	1987.46	557.465	1123.21	1111.62	1106.6	364.39	-882.439	-881.357	-880.862	-193.075	1145.4	1127.82	1109.48	364.39	14831	14603.4	14365.9	4718.24	781.008	0.681866
Valley County, Idaho	16085	6	9862	99.7893	97.8377	95.2029	34.0661	96.0864	95.0933	94.7183	34.0661	143.453	141.951	141.309	46.5317	47.3664	46.8575	46.5906	12.4656	147.156	144.695	141.793	46.5317	14921.5	14672	14377.8	4718.28	100.624	0.683793
Washington County, Idaho	16087	6	10198	282.243	280.303	279.038	102.969	280.599	279.099	278.824	102.969	148.34	146.787	146.123	48.117	-132.258	-132.312	-132.701	-54.8522	149.984	147.991	146.337	48.117	14707.2	14511.8	14349.6	4718.28	101.867	0.679186
Adams County, Illinois	17001	5	67103	27.3404	14.0495	5.05389	0.541312	19.9127	8.62631	4.08822	0.541312	126.15	12.7514	8.83221	2.47633	106.237	4.12507	4.74398	1.93502	133.578	18.1746	9.79788	2.47633	1990.64	270.846	146.012	36.9034	131.101	0.981462
Alexander County, Illinois	17003	4	8238	3.24259	1.74784	0.656057	0.115468	2.33068	1.08214	0.537508	0.115468	15.487	1.56544	1.0843	0.30401	13.1563	0.483301	0.546791	0.188542	16.3989	2.23114	1.20285	0.30401	1990.64	270.835	146.012	36.9034	16.0949	0.981462
Bond County, Illinois	17005	2	17768	3.00793	2.22904	0.698303	0.054561	1.04595	0.796791	0.443245	0.054561	35.4888	4.8399	2.51043	0.721075	34.4429	4.04311	2.06718	0.666514	37.4508	6.27214	2.76549	0.721075	2107.77	353.002	155.644	40.5828	36.7297	0.980746
Boone County, Illinois	17007	3	54165	9.74494	6.29995	1.96062	0.268386	3.76229	1.93262	1.18288	0.268386	33.3719	10.2766	7.11294	1.98234	29.6096	8.34397	5.93007	1.71395	39.3546	14.6439	7.89069	1.98234	726.568	270.358	145.679	36.5981	37.3722	0.949629
Brown County, Illinois	17009	6	6937	3.8671	0.984209	0.444966	0.0356757	3.09336	0.41938	0.34438	0.0356757	13.0412	1.31822	0.91306	0.255999	9.94784	0.898837	0.568679	0.220323	13.8149	1.88305	1.01365	0.255999	1991.49	271.45	146.122	36.9034	13.5589	0.981469
Bureau County, Illinois	17011	5	34978	9.59053	6.63163	3.57115	0.828568	5.72184	3.80749	3.06822	0.828568	65.7568	6.64677	4.60386	1.29081	60.035	2.83927	1.53564	0.46224	69.6255	9.4709	5.10679	1.29081	1990.55	270.767	146	36.9034	68.3347	0.981461
Calhoun County, Illinois	17013	2	5089	0.77267	0.558449	0.201847	0.012	0.22	0.155	0.13	0.012	10.1645	1.38621	0.719021	0.206526	9.94448	1.23121	0.589021	0.194526	10.7172	1.78966	0.790868	0.206526	2105.94	351.673	155.407	40.5828	10.5106	0.980729
Carroll County, Illinois	17015	6	15387	9.67174	6.48095	4.40133	1.05853	7.97228	5.24035	4.1804	1.05853	9.48044	2.91942	2.02068	0.563151	1.50816	-2.32093	-2.15972	-0.495381	11.1799	4.16002	2.24161	0.563151	726.581	270.36	145.682	36.5992	10.6167	0.949628
Cass County, Illinois	17017	6	13642	8.07861	5.78698	4.15837	1.21036	6.57259	4.68759	3.96259	1.21036	25.6462	2.59235	1.79558	0.503436	19.0737	-2.09524	-2.167	-0.706921	27.1523	3.69175	1.99137	0.503436	1990.34	270.616	145.973	36.9034	26.6488	0.981459
Champaign County, Illinois	17019	4	201081	47.0329	27.6545	9.13673	1.48836	24.8017	11.4257	6.24668	1.48836	197.811	38.2518	26.5076	7.46159	173.009	26.8261	20.2609	5.97323	220.042	54.4806	29.3977	7.46159	1094.3	270.938	146.198	37.1074	212.58	0.96609
Christian County, Illinois	17021	5	34800	5.26151	3.99964	1.15755	0.106571	1.42043	1.19565	0.658215	0.106571	34.2341	6.62004	4.58753	1.29134	32.8136	5.42438	3.92932	1.18477	38.0751	9.42403	5.08687	1.29134	1094.11	270.805	146.174	37.1074	36.7838	0.966085
Clark County, Illinois	17023	6	16335	8.30421	6.83219	5.11332	1.64248	6.49423	5.5109	4.87802	1.64248	16.0693	3.10742	2.15337	0.606149	9.57512	-2.40348	-2.72465	-1.03633	17.8793	4.4287	2.38867	0.606149	1094.54	271.118	146.23	37.1074	17.2732	0.966098
Clay County, Illinois	17025	6	13815	28.0129	2.54201	0.813844	0.0685826	26.4654	1.40484	0.588623	0.0583582	13.5903	2.62804	1.82117	0.512638	-12.8751	1.2232	1.23255	0.45428	15.1379	3.76521	2.04639	0.522863	1095.76	272.545	148.128	37.8475	14.615	0.96546
Clinton County, Illinois	17027	2	37762	17.4464	11.4715	6.94149	0.738271	13.26	8.41533	6.39725	0.738271	75.4237	10.2861	5.33537	1.53249	62.1638	1.87082	-1.06188	0.794217	79.6102	13.3423	5.87961	1.53249	2108.21	353.325	155.702	40.5828	78.0777	0.98075
Coles County, Illinois	17029	5	53873	6.96822	5.17814	1.28653	0.122356	0.723034	0.540809	0.222225	0.015	52.9969	10.2483	7.10184	1.99908	52.2738	9.7075	6.87962	1.98408	59.2421	14.8856	8.16615	2.10644	1099.66	276.31	151.581	39.1001	57.1356	0.964443
Cook County, Illinois	17031	1	5194675	1466.93	669.821	149.624	1.92469	887.651	245.573	69.894	0.0434	2942.66	646.755	421.253	143.921	2055	401.182	351.359	143.878	3521.94	1071	500.983	145.803	677.99	206.173	96.4417	28.0677	3376.13	0.958602
Crawford County, Illinois	17033	6	19817	21.7626	15.4622	8.59631	1.814	19.5796	13.8686	8.31251	1.814	19.4947	3.76981	2.61239	0.735357	-0.0848706	-10.0987	-5.70012	-1.07864	21.6778	5.36343	2.89618	0.735357	1093.9	270.648	146.146	37.1074	20.9424	0.966078
Cumberland County, Illinois	17035	5	11048	2.67038	1.89226	0.715956	0.044	1.44069	0.994595	0.556097	0.044	10.8683	2.10167	1.45641	0.409962	9.42764	1.10708	0.900313	0.365962	12.098	2.99934	1.61627	0.409962	1095.04	271.483	146.295	37.1074	11.6881	0.966113
DeKalb County, Illinois	17037	2	105160	15.2331	11.344	3.90802	0.333254	1.36252	0.610766	0.146753	0	59.5706	13.0928	8.52777	2.91352	58.208	12.482	8.38101	2.91352	73.4411	23.826	12.289	3.24677	698.375	226.569	116.86	30.8746	70.1944	0.955791
De Witt County, Illinois	17039	4	16561	3.23113	1.94698	0.57769	0.0529578	1.29679	0.50506	0.23006	0.0120602	16.2917	3.15041	2.18316	0.614535	14.9949	2.64535	1.9531	0.602475	18.226	4.59233	2.53079	0.655433	1100.54	277.298	152.816	39.5769	17.5706	0.964039
Douglas County, Illinois	17041	6	19980	4.52938	2.68188	0.789286	0.0630098	2.33252	1.07818	0.503694	0.0630098	19.6551	3.80081	2.63388	0.741405	17.3225	2.72264	2.13018	0.678395	21.8519	5.40452	2.91947	0.741405	1093.69	270.497	146.119	37.1074	21.1105	0.966071
DuPage County, Illinois	17043	2	916924	114.557	80.4952	17.1045	1.06945	10.3	3.605	1.03	0	519.415	114.16	74.3563	25.4039	509.115	110.555	73.3263	25.4039	623.672	191.05	90.4308	26.4734	680.179	208.36	98.6241	28.8719	597.199	0.957552
Edgar County, Illinois	17045	6	18576	6.7303	5.31204	3.66229	0.380683	4.67161	3.8092	3.39466	0.380683	18.2739	3.53373	2.44879	0.689306	13.6023	-0.275467	-0.945869	0.308623	20.3326	5.03657	2.71642	0.689306	1094.56	271.133	146.233	37.1074	19.6433	0.966098
Edwards County, Illinois	17047	6	6721	1.65984	1.36361	0.428494	0.0497854	0.816984	0.722206	0.234778	0.014	6.6117	1.27854	0.886	0.249399	5.79471	0.556336	0.651222	0.235399	7.45456	1.91995	1.07972	0.285184	1109.14	285.664	160.648	42.4318	7.16937	0.961744
Effingham County, Illinois	17049	5	34242	7.52309	5.04002	2.04969	0.195	3.73728	2.27638	1.55753	0.195	33.6851	6.51389	4.51397	1.27063	29.9478	4.23751	2.95644	1.07563	37.4709	9.27753	5.00613	1.27063	1094.3	270.94	146.198	37.1074	36.2003	0.96609
Fayette County, Illinois	17051	6	22140	10.3809	4.33284	1.23246	0.0879983	7.81096	2.42325	0.790194	0.0419885	41.622	4.2072	2.9141	0.817041	33.8111	1.78395	2.12391	0.775053	44.1919	6.11679	3.35637	0.863051	1996.02	276.278	151.598	38.9815	43.3289	0.98047
Ford County, Illinois	17053	4	14081	5.8416	3.26717	1.454	0.229151	4.29412	2.13752	1.25283	0.229151	13.852	2.67864	1.85624	0.522509	9.55788	0.541126	0.60341	0.293357	15.3995	3.8083	2.05741	0.522509	1093.64	270.456	146.112	37.1074	14.877	0.96607
Franklin County, Illinois	17055	6	39561	21.4922	9.78258	2.79969	0.130244	16.8498	6.31899	1.95577	0.028	74.3632	7.51671	5.20643	1.45975	57.5135	1.19771	3.25066	1.43175	79.0056	10.9803	6.05035	1.56199	1997.06	277.554	152.937	39.4832	77.4437	0.980229
Fulton County, Illinois	17057	5	37069	2158.24	5.01452	2.05634	0.60489	2154.15	2.029	1.52467	0.60489	69.6878	7.04411	4.87908	1.36797	-2084.46	5.01511	3.35441	0.763082	73.7775	10.0296	5.41075	1.36797	1990.28	270.567	145.964	36.9034	72.4096	0.981458
Gallatin County, Illinois	17059	6	5589	38.9398	35.2088	32.8923	11.8187	38.3319	34.765	32.8133	11.8187	10.507	1.06206	0.735633	0.206253	-27.8248	-33.703	-32.0777	-11.6125	11.115	1.50586	0.814666	0.206253	1988.72	269.433	145.762	36.9034	10.9087	0.981444
Greene County, Illinois	17061	6	13886	2.90656	2.156	1.06273	0.0841122	1.35909	1.02635	0.861554	0.0841122	26.105	2.63872	1.8277	0.512441	24.7459	1.61237	0.966144	0.428328	27.6524	3.76837	2.02887	0.512441	1991.39	271.379	146.109	36.9034	27.14	0.981469
Grundy County, Illinois	17063	2	50063	14.2046	7.44279	1.76864	0.0478976	8.67794	3.4083	1.05017	0.0478976	28.3595	6.23301	4.05977	1.38702	19.6815	2.82471	3.0096	1.33913	33.8862	10.2675	4.77824	1.38702	676.87	205.092	95.4446	27.7056	32.4991	0.959068
Hamilton County, Illinois	17065	6	8457	1.886	1.52332	0.452244	0.0343389	0.946476	0.837471	0.330107	0.0343389	15.8987	1.60706	1.11312	0.312092	14.9522	0.769588	0.783018	0.277753	16.8382	2.29291	1.23526	0.312092	1991.04	271.125	146.064	36.9034	16.5261	0.981465
Hancock County, Illinois	17067	5	19104	4.76465	3.58746	1.97305	0.221907	2.66452	2.05437	1.70003	0.221907	35.9145	3.63028	2.5145	0.705003	33.25	1.5759	0.814466	0.483095	38.0147	5.16337	2.78752	0.705003	1989.88	270.277	145.913	36.9034	37.3096	0.981454
Hardin County, Illinois	17069	6	4320	2.09435	1.70147	0.37162	0.0213366	1.56931	1.30701	0.267303	0.006	8.12137	0.820917	0.568606	0.159423	6.55207	-0.486089	0.301302	0.153423	8.64641	1.21538	0.672922	0.174759	2001.48	281.339	155.769	40.4535	8.47165	0.979788
Henderson County, Illinois	17071	5	7331	12.6447	7.93367	5.67811	1.70358	11.8433	7.34867	5.57393	1.70358	13.7819	1.39309	0.964918	0.270539	1.93855	-5.95559	-4.60902	-1.43304	14.5833	1.97809	1.0691	0.270539	1989.26	269.825	145.832	36.9034	14.3127	0.981449
Henry County, Illinois	17073	3	50486	18.6827	7.921	3.54198	0.466243	13.1007	3.84616	2.81632	0.466243	94.911	9.5937	6.64505	1.86311	81.8103	5.74754	3.82873	1.39686	100.493	13.6685	7.37071	1.86311	1990.51	270.739	145.995	36.9034	98.6299	0.98146
Iroquois County, Illinois	17075	6	29718	8.91082	6.83942	4.34675	1.11122	5.52572	4.35572	3.90572	1.11122	29.2347	5.65328	3.91759	1.10276	23.709	1.29757	0.0118761	-0.00845883	32.6198	8.13698	4.35862	1.10276	1097.64	273.807	146.666	37.1074	31.517	0.966194
Jackson County, Illinois	17077	4	60218	10.9436	7.46629	2.56694	0.322498	4.26579	2.58917	1.69865	0.322498	113.207	11.443	7.92599	2.22225	108.941	8.85388	6.22734	1.89975	119.884	16.3202	8.79428	2.22225	1990.84	271.018	146.041	36.9034	117.662	0.981463
Jasper County, Illinois	17079	6	9698	4.88518	3.47142	1.38051	0.0962244	3.77993	2.65714	1.21279	0.086	9.54028	1.84486	1.27844	0.359867	5.76035	-0.812279	0.0656548	0.273867	10.6455	2.65915	1.44617	0.370092	1097.7	274.195	149.12	38.1616	10.2754	0.965235
Jefferson County, Illinois	17081	5	38827	6.12998	4.56458	1.12866	0.0606732	1.76383	1.3549	0.488936	0.03	72.9927	7.37818	5.11047	1.43285	71.2289	6.02328	4.62154	1.40285	77.3589	10.5879	5.7502	1.46352	1992.4	272.693	148.098	37.6934	75.8954	0.981081
Jersey County, Illinois	17083	2	22985	6.45808	5.11766	3.31079	0.32101	3.80529	3.14755	2.85774	0.275	45.909	6.26098	3.24754	0.932796	42.1037	3.11343	0.389795	0.657796	48.5617	8.23109	3.70058	0.978806	2112.76	358.107	161	42.5845	47.5829	0.979844
Jo Daviess County, Illinois	17085	6	22678	11.6917	7.9363	5.13147	0.569151	9.19084	6.1107	4.80637	0.569151	13.9711	4.30229	2.97783	0.829905	4.7803	-1.80841	-1.82854	0.260754	16.472	6.12789	3.30294	0.829905	726.341	270.213	145.645	36.5952	15.6421	0.949617
Johnson County, Illinois	17087	6	12582	2.59908	1.83926	0.578528	0.047561	1.2036	0.820565	0.397116	0.047561	23.6535	2.39092	1.65606	0.464319	22.4499	1.57035	1.25895	0.416758	25.049	3.40962	1.83748	0.464319	1990.86	270.992	146.04	36.9034	24.5847	0.981464
Kane County, Illinois	17089	2	515269	450.925	57.0465	13.9536	1.16207	391.154	12.6524	3.73115	0.119182	291.887	64.1527	41.7848	14.2758	-99.2668	51.5003	38.0537	14.1566	351.658	108.547	52.0073	15.3187	682.476	210.66	100.932	29.7295	336.34	0.956439
Kankakee County, Illinois	17091	4	113449	39.8418	27.1867	12.7349	3.25457	27.4068	18.1091	11.1184	3.25457	64.2661	14.1248	9.19995	3.14317	36.8593	-3.98433	-1.91843	-0.111403	76.7011	23.2024	10.8165	3.14317	676.085	204.518	95.3425	27.7056	73.558	0.959021
Kendall County, Illinois	17093	2	114736	19.1373	12.4356	3.43604	0.409527	5.40343	2.12635	0.737081	0.021	64.9951	14.285	9.30431	3.17883	59.5917	12.1587	8.56723	3.15783	78.729	24.5942	12.0033	3.56735	686.175	214.355	104.616	31.0918	75.1616	0.954688
Knox County, Illinois	17095	5	52919	8.05464	6.01596	2.31603	0.219132	2.19634	1.7394	1.55445	0.219132	99.485	10.056	6.96529	1.95289	97.2886	8.31664	5.41083	1.73376	105.343	14.3326	7.72686	1.95289	1990.65	270.84	146.013	36.9034	103.39	0.981462
Lake County, Illinois	17097	2	703462	122.184	75.8017	18.5781	1.60601	44.4367	19.0465	8.47105	1.60601	398.436	87.5707	57.0377	19.487	353.999	68.5242	48.5667	17.881	476.183	144.326	67.1448	19.487	676.914	205.165	95.4491	27.7016	456.696	0.959077
LaSalle County, Illinois	17099	5	113924	1597.63	32.8841	7.01666	0.581645	1584.44	23.0977	4.7908	0.480276	70.1878	21.6137	14.9599	4.16925	-1514.25	-1.48404	10.1691	3.68898	83.3764	31.4001	17.1858	4.27062	731.86	275.623	150.853	37.4866	79.1058	0.948779
Lawrence County, Illinois	17101	6	16833	23.7486	21.3701	12.7741	3.99907	21.8833	20.0085	12.5316	3.99907	16.5592	3.20216	2.21902	0.624628	-5.32405	-16.8063	-10.3126	-3.37444	18.4245	4.5638	2.4615	0.624628	1094.55	271.122	146.231	37.1074	17.7999	0.966098
Lee County, Illinois	17103	5	36031	22.5809	19.4838	16.2815	5.60718	18.6017	16.579	15.7642	5.60718	22.1984	6.83582	4.73141	1.31862	3.59673	-9.74316	-11.0328	-4.28857	26.1777	9.74064	5.24871	1.31862	726.532	270.341	145.672	36.5968	24.859	0.949628
Livingston County, Illinois	17105	5	38950	11.3427	6.90289	2.62384	0.219132	7.03191	3.75599	2.06343	0.219132	23.9968	7.38961	5.11472	1.42544	16.9649	3.63362	3.05129	1.20631	28.3077	10.5365	5.67513	1.42544	726.769	270.514	145.703	36.5968	26.8822	0.949645
Logan County, Illinois	17107	5	30305	19.5687	15.2052	3.13327	0.0836732	16.225	12.7643	2.69859	0.0836732	48.0327	5.76915	3.99918	1.12874	31.8077	-6.99515	1.30059	1.04507	51.3764	8.21002	4.43385	1.12874	1695.31	270.913	146.308	37.2461	50.2476	0.97803
McDonough County, Illinois	17109	5	32612	6.06725	3.85386	1.17052	0.0881348	2.45914	1.21969	0.70145	0.0881348	61.3089	6.19716	4.29245	1.20349	58.8497	4.97747	3.591	1.11536	64.917	8.83133	4.76152	1.20349	1990.59	270.8	146.005	36.9034	63.7135	0.981461
McHenry County, Illinois	17111	2	308760	56.6341	39.8999	15.3899	2.27249	22.5068	14.9869	10.9534	2.27249	174.963	38.4544	25.0466	8.5572	152.456	23.4675	14.0933	6.28471	209.09	63.3673	29.4832	8.5572	677.193	205.232	95.489	27.7147	200.533	0.959074
McLean County, Illinois	17113	4	169572	21.5079	16.0398	4.08337	0.312959	2.75855	2.3528	1.64596	0.312959	166.814	32.2578	22.3539	6.29237	164.056	29.905	20.708	5.97941	185.564	45.9448	24.7913	6.29237	1094.31	270.946	146.199	37.1074	179.271	0.96609
Macon County, Illinois	17115	4	110768	55.3419	24.4594	6.43652	0.185815	42.6167	15.0432	4.37354	0.012	108.967	21.0715	14.6021	4.11031	66.3499	6.02833	10.2285	4.09831	121.692	30.4878	16.665	4.28412	1098.62	275.24	150.45	38.6765	117.408	0.964795
Macoupin County, Illinois	17117	2	47765	8.60272	6.50422	2.0499	0.163683	3.31091	2.6412	1.36196	0.163683	95.4031	13.0109	6.74868	1.93844	92.0922	10.3697	5.38672	1.77475	100.695	16.8739	7.43662	1.93844	2108.13	353.27	155.692	40.5828	98.7565	0.980749
Madison County, Illinois	17119	2	269282	298.804	62.0536	16.2088	0.398959	269.029	40.3178	12.338	0.398959	537.849	73.3508	38.0467	10.9282	268.82	33.0331	25.7087	10.5293	567.624	95.0866	41.9174	10.9282	2107.92	353.112	155.664	40.5828	556.696	0.980747
Marion County, Illinois	17121	5	39437	25.0997	7.13251	3.82452	0.411676	20.7473	3.95531	3.25872	0.411676	74.1395	7.4941	5.19076	1.45536	53.3922	3.53879	1.93204	1.04368	78.4918	10.6713	5.75657	1.45536	1990.31	270.591	145.969	36.9034	77.0365	0.981458
Marshall County, Illinois	17123	3	12640	4.91595	2.82132	0.881514	0.091683	3.52047	1.80262	0.700102	0.091683	20.0341	2.40627	1.66803	0.470791	16.5136	0.603652	0.967927	0.379108	21.4296	3.42497	1.84944	0.470791	1695.38	270.963	146.317	37.2461	20.9588	0.978031
Mason County, Illinois	17125	6	14666	93.6961	92.6305	90.5903	31.2848	90.836	90.381	90.206	31.2848	27.5713	2.78694	1.93036	0.541225	-63.2647	-87.5941	-88.2757	-30.7436	30.4314	5.03644	2.31461	0.541225	2074.96	343.409	157.821	36.9034	29.8902	0.982215
Massac County, Illinois	17127	5	15429	15.6041	10.2052	7.28557	2.28682	13.9046	8.96464	7.06464	2.28682	29.0057	2.93193	2.03079	0.569383	15.1011	-6.03271	-5.03385	-1.71743	30.7052	4.17253	2.25172	0.569383	1990.09	270.434	145.941	36.9034	30.1358	0.981456
Menard County, Illinois	17129	4	12705	3.04572	2.58086	1.61079	0.460649	1.63641	1.55207	1.42758	0.460649	23.8847	2.41429	1.67225	0.468858	22.2483	0.862226	0.244669	0.00820871	25.294	3.44309	1.85546	0.468858	1990.87	271.002	146.042	36.9034	24.8252	0.981464
Mercer County, Illinois	17131	3	16434	5.18472	4.04229	2.69801	0.706137	3.36091	2.71091	2.46091	0.706137	30.8951	3.1229	2.16307	0.606471	27.5342	0.411993	-0.297841	-0.0996665	32.7189	4.45429	2.40017	0.606471	1990.93	271.041	146.049	36.9034	32.1124	0.981464
Monroe County, Illinois	17133	2	32957	8.12005	6.14806	3.56052	0.998191	4.47243	3.4853	3.08633	0.998191	65.8265	8.97729	4.65647	1.33749	61.354	5.492	1.57014	0.339297	69.4741	11.6401	5.13066	1.33749	2108.02	353.189	155.677	40.5828	68.1366	0.980748
Montgomery County, Illinois	17135	6	30104	5.84159	4.04517	1.44206	0.145907	2.5256	1.6245	1.01098	0.145907	56.5939	5.72057	3.96234	1.11094	54.0684	4.09608	2.95135	0.965033	59.9099	8.14124	4.39342	1.11094	1990.1	270.437	145.941	36.9034	58.799	0.981456
Morgan County, Illinois	17137	5	35547	5.64663	4.12843	1.59076	0.246376	1.70885	1.25385	1.07885	0.246376	66.8265	6.75489	4.67875	1.31181	65.1177	5.50104	3.5999	1.06543	70.7643	9.62946	5.19067	1.31181	1990.72	270.894	146.023	36.9034	69.4525	0.981462
Moultrie County, Illinois	17139	6	14846	5.35973	1.99202	0.855504	0.186804	3.24577	0.321989	0.171989	0.0129889	14.6046	2.82417	1.95708	0.550896	11.3588	2.50218	1.78509	0.537907	16.7185	4.4942	2.6406	0.724711	1126.13	302.721	177.866	48.8152	15.9938	0.956652
Ogle County, Illinois	17141	5	53497	99.9739	9.77102	3.35714	0.296212	94.0604	5.45412	2.58837	0.296212	32.9591	10.1495	7.02496	1.95782	-61.1012	4.69536	4.43659	1.66161	38.8727	14.4664	7.79372	1.95782	726.633	270.415	145.685	36.5968	36.9149	0.949635
Peoria County, Illinois	17143	3	186494	763.797	85.0232	24.4085	0.950831	743.169	69.9645	21.7268	0.950831	295.589	35.5028	24.6106	6.94618	-447.58	-34.4617	2.8838	5.99535	316.217	50.5615	27.2923	6.94618	1695.59	271.116	146.344	37.2461	309.271	0.978034
Perry County, Illinois	17145	6	22350	80.395	3.0677	0.914822	0.0737639	77.8539	1.20212	0.58367	0.0737639	42.0168	4.2471	2.94174	0.824791	-35.8371	3.04498	2.35807	0.751027	44.5579	6.11268	3.2729	0.824791	1993.64	273.498	146.438	36.9034	43.7331	0.981489
Piatt County, Illinois	17147	4	16729	86.404	4.0463	1.36043	0.17106	84.5525	2.69474	1.11974	0.17106	16.4569	3.18237	2.20531	0.620769	-68.0956	0.487631	1.08557	0.449709	18.3084	4.53393	2.446	0.620769	1094.41	271.022	146.213	37.1074	17.6876	0.966094
Pike County, Illinois	17149	6	16430	11.4955	3.31915	1.85549	0.281521	9.6717	1.98776	1.61839	0.281521	30.8875	3.12214	2.16254	0.606323	21.2158	1.13439	0.544153	0.324802	32.7114	4.45354	2.39964	0.606323	1990.95	271.061	146.052	36.9034	32.105	0.981464
Pope County, Illinois	17151	6	4470	0.577403	0.443104	0.144662	0.008	0.08	0.08	0.08	0.008	8.40337	0.849421	0.588349	0.164958	8.32337	0.769421	0.508349	0.156958	8.90077	1.21252	0.653011	0.164958	1991.22	271.258	146.087	36.9034	8.73581	0.981467
Pulaski County, Illinois	17153	6	6161	1.35099	0.936441	0.266215	0.0223366	0.673956	0.442205	0.178201	0.0223366	11.5824	1.17076	0.810921	0.227362	10.9084	0.728551	0.63272	0.205025	12.2594	1.66499	0.898936	0.227362	1989.84	270.247	145.907	36.9034	12.032	0.981454
Putnam County, Illinois	17155	5	6006	4.43197	3.44702	0.760268	0.057122	3.76877	2.96289	0.674052	0.057122	11.291	1.1413	0.790519	0.221642	7.5222	-1.82158	0.116468	0.16452	11.9542	1.62544	0.876736	0.221642	1990.37	270.636	145.977	36.9034	11.7325	0.981459
Randolph County, Illinois	17157	6	33476	7.28558	4.87763	1.55927	0.196616	3.05719	1.66069	0.624087	0.0330256	62.9331	6.36134	4.40617	1.23538	59.8759	4.70065	3.78208	1.20235	67.1615	9.57828	5.34135	1.39897	2006.26	286.124	159.558	41.7902	65.7625	0.97917
Richland County, Illinois	17159	6	16233	4.55259	3.24159	1.00861	0.068561	2.75634	1.93032	0.7751	0.068561	15.969	3.08802	2.13992	0.602364	13.2127	1.1577	1.36483	0.533803	17.7653	4.39929	2.37344	0.602364	1094.39	271.009	146.211	37.1074	17.1629	0.966093
Rock Island County, Illinois	17161	3	147546	56.2801	27.703	8.8662	0.609828	39.9764	15.8013	6.74672	0.609828	277.379	28.0377	19.4202	5.44495	237.402	12.2364	12.6735	4.83512	293.683	39.9395	21.5397	5.44495	1990.45	270.692	145.987	36.9034	288.238	0.98146
St. Clair County, Illinois	17163	2	270056	36.7669	25.8548	6.54695	0.710836	4.72511	1.87467	0.481597	2.58836e-05	539.395	73.5617	38.156	10.9596	534.67	71.687	37.6744	10.9596	571.437	97.5418	44.2214	11.6704	2115.99	361.191	163.749	43.2149	559.766	0.979577
Saline County, Illinois	17165	6	24913	6.33105	4.94195	1.21422	0.0842342	3.27956	2.6769	0.814646	0.0842342	46.8351	4.73414	3.27909	0.919374	43.5556	2.05724	2.46444	0.83514	49.8866	6.99919	3.67866	0.919374	2002.43	280.945	147.66	36.9034	48.9673	0.981571
Sangamon County, Illinois	17167	4	197465	322.814	33.1777	7.34142	0.323261	299.681	16.122	4.32122	0.323261	312.977	37.5914	26.0583	7.3548	13.2962	21.4694	21.7371	7.03154	336.11	54.6471	29.0785	7.3548	1702.12	276.743	147.259	37.2461	328.755	0.978118
Schuyler County, Illinois	17169	6	7544	2.09061	1.53805	0.907352	0.160581	1.24779	0.922785	0.797785	0.160581	14.1823	1.43356	0.992954	0.278399	12.9345	0.510778	0.195168	0.117819	15.0251	2.04882	1.10252	0.278399	1991.67	271.583	146.145	36.9034	14.7467	0.981471
Scott County, Illinois	17171	5	5355	21.207	6.28547	4.09775	1.17567	20.6267	5.86185	4.02231	1.17567	10.0671	1.01759	0.704834	0.197618	-10.5596	-4.84425	-3.31748	-0.978057	10.6474	1.44121	0.780273	0.197618	1988.31	269.134	145.709	36.9034	10.4498	0.98144
Shelby County, Illinois	17173	6	22363	722.734	4.17748	2.07929	0.697646	720.261	2.37204	1.75777	0.697646	21.9993	4.25414	2.94802	0.829832	-698.261	1.8821	1.19024	0.132186	24.4725	6.05958	3.26953	0.829832	1094.33	270.964	146.203	37.1074	23.6427	0.966091
Stark County, Illinois	17175	3	5994	1.40084	0.831772	0.28385	0.0212244	0.737634	0.347634	0.197634	0.0212244	11.2684	1.13902	0.78894	0.221199	10.5308	0.791389	0.591307	0.199975	11.9316	1.62316	0.875157	0.221199	1990.59	270.798	146.005	36.9034	11.7104	0.981461
Stephenson County, Illinois	17177	5	47711	12.9249	7.84627	3.20983	0.273356	7.64687	3.99333	2.52369	0.273356	29.3944	9.05175	6.26517	1.74607	21.7475	5.05842	3.74148	1.47271	34.6724	12.9047	6.95131	1.74607	726.717	270.476	145.696	36.5968	32.9263	0.949641
Tazewell County, Illinois	17179	3	135394	108.028	57.2371	28.3449	6.82555	93.0649	46.3137	26.3996	6.82555	214.596	25.7749	17.8672	5.0429	121.531	-20.5388	-8.53241	-1.78265	229.56	36.6983	19.8124	5.0429	1695.5	271.048	146.332	37.2461	224.517	0.978032
Union County, Illinois	17181	6	17808	5.92992	4.95215	3.32652	0.347571	3.96795	3.51992	3.07147	0.347571	33.4781	3.384	2.34392	0.657176	29.5102	-0.135915	-0.727548	0.309605	35.4401	4.81624	2.59897	0.657176	1990.12	270.454	145.944	36.9034	34.7829	0.981457
Vermilion County, Illinois	17183	4	81625	20.9252	13.0614	5.41547	0.506049	11.889	6.46499	4.24077	0.506049	80.2975	15.5276	10.7603	3.02889	68.4085	9.06261	6.5195	2.52284	89.3337	22.124	11.935	3.02889	1094.44	271.044	146.217	37.1074	86.3048	0.966095
Wabash County, Illinois	17185	6	11947	6.46495	4.86474	2.30946	0.619464	5.15234	3.90653	2.13882	0.619464	11.7527	2.27269	1.57492	0.443322	6.60037	-1.63384	-0.563896	-0.176142	13.0653	3.23089	1.74556	0.443322	1093.61	270.436	146.109	37.1074	12.622	0.966069
Warren County, Illinois	17187	6	17707	5.18633	3.08886	1.27188	0.095561	3.15527	1.58753	0.947738	0.07	33.2882	3.36481	2.33062	0.653449	30.133	1.77728	1.38289	0.583449	35.3193	4.86614	2.65477	0.67901	1994.65	274.814	149.927	38.347	34.6403	0.980775
Washington County, Illinois	17189	6	14716	6.17213	5.40423	3.97782	0.403122	4.54173	4.21403	3.76587	0.403122	27.6653	2.79644	1.93694	0.543071	23.1236	-1.41759	-1.82892	0.139949	29.2957	3.98664	2.1489	0.543071	1990.74	270.905	146.025	36.9034	28.7526	0.981462
Wayne County, Illinois	17191	6	16760	9.8496	8.82323	5.96124	1.15253	7.99802	7.47156	5.72053	1.15253	31.5079	3.18485	2.20598	0.618501	23.5099	-4.28671	-3.51456	-0.534027	33.3595	4.53652	2.44668	0.618501	1990.42	270.675	145.984	36.9034	32.741	0.98146
White County, Illinois	17193	6	14665	32.6578	31.2581	27.3529	9.79167	31.0413	30.078	27.1428	9.79167	27.5694	2.78675	1.93023	0.541188	-3.47183	-27.2913	-25.2125	-9.25048	29.186	3.9668	2.14038	0.541188	1990.18	270.494	145.951	36.9034	28.6448	0.981457
Whiteside County, Illinois	17195	5	58498	307.872	31.8405	27.0115	9.22596	301.406	27.1202	26.1709	9.22596	36.0402	11.0983	7.68167	2.14084	-265.365	-16.0219	-18.4893	-7.08512	42.5064	15.8186	8.52228	2.14084	726.631	270.413	145.685	36.5968	40.3656	0.949635
Will County, Illinois	17197	2	677560	119.251	73.5859	17.185	1.14057	41.3246	15.8826	4.42205	0.021	383.821	84.3585	54.9455	18.7722	342.496	68.4759	50.5235	18.7512	461.748	142.062	67.7085	19.8918	681.486	209.667	99.9299	29.3579	441.856	0.956921
Williamson County, Illinois	17199	4	66357	1596.89	12.013	6.03101	0.907001	1589.41	6.53889	5.05797	0.907001	124.757	12.6106	8.73468	2.44898	-1464.65	6.07169	3.6767	1.54198	132.231	18.0847	9.70772	2.44898	1992.73	272.537	146.295	36.9062	129.782	0.98148
Winnebago County, Illinois	17201	3	295266	53.7026	32.2951	7.3171	0.297834	21.0675	8.47143	3.07453	0.297834	181.91	56.0176	38.7726	10.8057	160.843	47.5462	35.6981	10.5079	214.545	79.8413	43.0152	10.8057	726.617	270.404	145.683	36.5965	203.74	0.949634
Woodford County, Illinois	17203	3	38664	14.7601	7.40331	2.31747	0.130571	10.4907	4.28668	1.76245	0.130571	61.2815	7.36046	5.10227	1.44008	50.7909	3.07378	3.33982	1.30951	65.5509	10.4771	5.65729	1.44008	1695.4	270.978	146.319	37.2461	64.1108	0.978031
Adams County, Indiana	18001	5	34387	12.2662	7.0025	3.1888	0.206	8.66	4.37	2.72	0.206	36.5715	6.23657	2.90156	0.512441	27.9115	1.86657	0.181559	0.306441	40.1777	8.86908	3.37036	0.512441	1168.4	257.919	98.0126	14.9022	39.6653	0.987246
Allen County, Indiana	18003	3	355329	72.852	44.392	9.40512	0.0966732	35.5468	17.1592	4.55544	0.0966732	377.902	64.444	29.9825	5.29517	342.356	47.2847	25.427	5.1985	415.208	91.6768	34.8322	5.29517	1168.52	258.005	98.0279	14.9022	409.912	0.987247
Bartholomew County, Indiana	18005	4	76794	27.6491	19.6316	10.1123	2.79892	19.5939	13.7513	9.0651	2.79892	120.065	10.7499	6.78718	1.89206	100.471	-3.00147	-2.27792	-0.906859	128.12	16.6301	7.83435	1.89206	1668.37	216.555	102.018	24.6382	126.228	0.985232
Benton County, Indiana	18007	4	8854	1.60244	1.09249	0.437061	0.0537854	0.676717	0.416717	0.316717	0.0537854	9.41648	1.6058	0.747096	0.131944	8.73976	1.18908	0.430379	0.0781584	10.3422	2.28158	0.86744	0.131944	1168.08	257.689	97.9716	14.9022	10.2103	0.987242
Blackford County, Indiana	18009	6	12766	3.13022	1.72836	0.524229	0.019	1.79	0.75	0.35	0.019	13.577	2.3153	1.07719	0.190241	11.787	1.5653	0.727189	0.171241	14.9172	3.29366	1.25142	0.190241	1168.51	258.002	98.0274	14.9022	14.727	0.987247
Boone County, Indiana	18011	2	56640	8.58547	6.02313	1.87131	0.240488	2.63046	1.67597	1.09716	0.240488	52.7551	7.91974	4.99702	1.38659	50.1246	6.24377	3.89986	1.14611	58.7101	12.2669	5.77117	1.38659	1036.55	216.577	101.892	24.4808	57.3235	0.976382
Brown County, Indiana	18013	2	15242	2.06274	1.37	0.308357	0.006	0.46	0.2	0.1	0.006	23.8304	2.13362	1.34711	0.375535	23.3704	1.93362	1.24711	0.369535	25.4332	3.30363	1.55547	0.375535	1668.63	216.745	102.052	24.6382	25.0577	0.985234
Carroll County, Indiana	18015	4	20155	9.75089	4.92354	2.45516	0.170344	7.63693	3.38034	2.18034	0.170344	21.4354	3.6554	1.70067	0.300353	13.7985	0.275052	-0.479675	0.130009	23.5494	5.19859	1.97548	0.300353	1168.41	257.93	98.0146	14.9022	23.249	0.987246
Cass County, Indiana	18017	5	38966	33.8417	10.4905	2.91191	0.123611	29.752	7.50497	2.38024	0.123611	41.4414	7.06704	3.28793	0.580678	11.6895	-0.437933	0.907692	0.457067	45.5312	10.0526	3.8196	0.580678	1168.49	257.983	98.0239	14.9022	44.9505	0.987247
Clark County, Indiana	18019	2	110232	36.9088	17.2751	4.15412	0.0222353	25.3304	8.82287	2.64892	0.0222353	186.908	20.0095	9.31867	1.66004	161.578	11.1866	6.66975	1.6378	198.487	28.4618	10.8239	1.66004	1800.63	258.199	98.1917	15.0595	196.827	0.991637
Clay County, Indiana	18021	4	26890	4.0077	2.652	0.686092	0.022	1.18908	0.594411	0.319672	0.022	45.591	4.88075	2.27303	0.40492	44.402	4.28634	1.95336	0.38292	48.4097	6.93834	2.63945	0.40492	1800.28	258.027	98.1572	15.0584	48.0047	0.991636
Clinton County, Indiana	18023	5	33224	9.79709	5.60327	2.25588	0.141337	6.30145	3.05145	1.80145	0.141337	35.3347	6.02565	2.80343	0.495109	29.0332	2.97419	1.00198	0.353773	38.8303	8.57746	3.25786	0.495109	1168.74	258.171	98.0574	14.9022	38.3352	0.987249
Crawford County, Indiana	18025	6	10713	4.25916	2.00698	0.58549	0.014	3.14	1.19	0.44	0.014	18.1649	1.94464	0.905643	0.161332	15.0249	0.75464	0.465643	0.147332	19.284	2.76162	1.05113	0.161332	1800.06	257.783	98.1176	15.0595	19.1227	0.991634
Daviess County, Indiana	18027	5	31648	12.7076	6.67536	2.7008	0.233581	9.38841	4.25192	2.26927	0.233581	53.6722	5.74588	2.67593	0.476694	44.2838	1.49396	0.406658	0.243113	56.9914	8.16933	3.10746	0.476694	1800.79	258.131	98.1882	15.0624	56.5147	0.991636
Dearborn County, Indiana	18029	2	50047	372.074	8.62483	2.19148	0.1073	366.824	4.79208	1.50894	0.1073	84.8592	9.08461	4.23082	0.753683	-281.964	4.29253	2.72188	0.646383	90.1096	12.9174	4.91336	0.753683	1800.5	258.105	98.1749	15.0595	89.3559	0.991636
Decatur County, Indiana	18031	5	25740	8.40862	4.99876	2.26766	0.149	5.71435	3.03194	1.91741	0.149	43.6445	4.67237	2.17598	0.387632	37.9302	1.64043	0.25857	0.238632	46.3388	6.63918	2.52623	0.387632	1800.26	257.932	98.1443	15.0595	45.9511	0.991635
DeKalb County, Indiana	18033	5	42223	13.9273	7.06321	2.16741	0.167917	9.14213	3.47552	1.24084	0.132917	44.9054	7.65774	3.56276	0.629214	35.7632	4.18222	2.32192	0.496297	49.6905	11.2454	4.48933	0.664214	1176.86	266.334	106.324	15.7311	49.0263	0.986633
Delaware County, Indiana	18035	4	117671	24.9548	14.2364	3.1846	0.0598976	12.6026	5.2193	1.57882	0.0598976	125.146	21.3413	9.92902	1.75355	112.544	16.122	8.3502	1.69365	137.499	30.3584	11.5348	1.75355	1168.5	257.994	98.0259	14.9022	135.745	0.987247
Dubois County, Indiana	18037	5	41889	11.0066	6.87619	3.09506	0.207004	6.60251	3.6599	2.52243	0.207004	71.0266	7.60376	3.54116	0.630828	64.4241	3.94386	1.01874	0.423824	75.4306	10.82	4.11379	0.630828	1800.73	258.303	98.207	15.0595	74.7998	0.991637
Elkhart County, Indiana	18039	4	197559	58.7846	38.1086	21.3402	5.70277	38.0457	22.9692	18.6442	5.70277	210.112	35.8305	16.6701	2.94409	172.066	12.8613	-1.97407	-2.75869	230.851	50.9699	19.3662	2.94409	1168.51	257.998	98.0272	14.9023	227.907	0.987247
Fayette County, Indiana	18041	5	24277	4.6341	2.75741	0.773747	0.0373408	2.03655	0.850004	0.400004	0.0220042	41.1639	4.4068	2.0523	0.3656	39.1273	3.5568	1.6523	0.343595	43.7614	6.3142	2.42604	0.380936	1802.59	260.09	99.9318	15.6912	43.3805	0.991295
Floyd County, Indiana	18043	2	74578	22.748	6.31767	1.22387	0.0145427	14.9139	0.59877	0.20544	0.0145427	126.454	13.5375	6.30459	1.12311	111.54	12.9387	6.09915	1.10856	134.288	19.2564	7.32302	1.12311	1800.64	258.205	98.1928	15.0595	133.165	0.991637
Fountain County, Indiana	18045	6	17240	3.88251	2.35008	0.855797	0.11302	2.0587	1.0187	0.618702	0.11302	18.3352	3.12672	1.4547	0.256913	16.2765	2.10802	0.836002	0.143894	20.159	4.4581	1.6918	0.256913	1169.32	258.591	98.1322	14.9022	19.9021	0.987256
Franklin County, Indiana	18047	6	23087	6.57556	3.51399	1.12994	0.0481122	4.14382	1.73882	0.813817	0.0481122	39.1461	4.19079	1.9517	0.347679	35.0023	2.45197	1.13789	0.299567	41.5778	5.96596	2.26783	0.347679	1800.92	258.412	98.2297	15.0595	41.2302	0.991638
Fulton County, Indiana	18049	6	20836	11.7978	9.80789	7.49237	2.44062	9.60088	8.20416	7.20677	2.44062	22.1597	3.77891	1.75813	0.310501	12.5588	-4.42526	-5.44864	-2.13012	24.3566	5.38263	2.04373	0.310501	1168.97	258.333	98.0863	14.9022	24.0461	0.987252
Gibson County, Indiana	18051	6	33503	898.528	12.4374	3.23803	0.561354	892.274	7.51512	2.39754	0.561354	56.8074	6.08152	2.83224	0.504539	-835.467	-1.4336	0.434694	-0.0568154	63.0615	11.0038	3.67272	0.504539	1882.26	328.444	109.624	15.0595	62.557	0.991999
Grant County, Indiana	18053	5	70061	18.4532	12.4442	2.503	0.022	11.0888	7.0682	1.54564	0.022	74.5119	12.7066	5.91171	1.04406	63.423	5.63836	4.36608	1.02206	81.8762	18.0825	6.86908	1.04406	1168.64	258.097	98.0442	14.9022	80.8321	0.987248
Greene County, Indiana	18055	6	33165	9.23898	4.69841	1.58432	0.0835723	5.75716	2.15669	1.13169	0.0835723	56.2343	6.02016	2.80366	0.499448	50.4771	3.86348	1.67198	0.415876	59.7161	8.56189	3.2563	0.499448	1800.58	258.16	98.1849	15.0595	59.2166	0.991636
Hamilton County, Indiana	18057	2	274569	121.255	62.4347	13.2983	0.280882	92.4332	41.3949	9.55151	0.280882	186.527	38.4147	24.2465	6.74449	94.094	-2.98021	14.695	6.46361	215.349	59.4545	27.9933	6.74449	784.316	216.538	101.954	24.5639	208.604	0.968681
Hancock County, Indiana	18059	2	70002	13.9996	8.11496	2.20465	0.083561	6.58	2.68	1.18	0.058	65.2006	9.78809	6.17588	1.71371	58.6206	7.10809	4.99588	1.65571	72.6201	15.223	7.20053	1.73927	1037.4	217.466	102.862	24.846	70.8809	0.97605
Harrison County, Indiana	18061	2	39364	5.88502	4.05087	1.28885	0.064	1.74	1.025	0.75	0.064	66.7452	7.14542	3.32771	0.592802	65.0052	6.12042	2.57771	0.528802	70.8903	10.1713	3.86656	0.592802	1800.89	258.39	98.2258	15.0595	70.2974	0.991638
Hendricks County, Indiana	18063	2	145448	21.803	12.1115	2.42605	0.0242713	6.53545	0.966271	0.441271	0.0242713	135.472	20.3374	12.832	3.56069	128.936	19.3711	12.3908	3.53642	150.739	31.4827	14.8168	3.56069	1036.38	216.453	101.87	24.4808	147.179	0.976378
Henry County, Indiana	18065	5	49462	13.2976	5.54545	1.57839	0.0982774	8.10249	1.75303	0.903027	0.0982773	77.3325	6.92385	4.37153	1.21865	69.23	5.17082	3.4685	1.12038	82.5276	10.7163	5.04689	1.21865	1668.5	216.657	102.036	24.6382	81.3089	0.985233
Howard County, Indiana	18067	4	82752	26.5994	16.8345	3.77821	0.062	17.9087	10.4903	2.64842	0.062	88.0091	15.0083	6.98257	1.23318	70.1004	4.51799	4.33416	1.17118	96.6998	21.3525	8.11237	1.23318	1168.55	258.03	98.0323	14.9022	95.4666	0.987247
Huntington County, Indiana	18069	5	37124	7.83632	4.63932	1.47652	0.064	3.94	1.795	0.97	0.064	39.4824	6.73297	3.13251	0.553228	35.5424	4.93797	2.16251	0.489228	43.3787	9.57728	3.63903	0.553228	1168.48	257.981	98.0236	14.9022	42.8255	0.987247
Jackson County, Indiana	18071	5	42376	15.0237	10.3373	5.51744	1.06007	10.5747	7.0895	4.93907	1.06007	71.8523	7.69216	3.58233	0.638162	61.2776	0.602658	-1.35674	-0.421912	76.3013	10.9399	4.1607	0.638162	1800.58	258.163	98.1854	15.0595	75.6632	0.991636
Jasper County, Indiana	18073	2	33478	486.224	30.7823	24.6782	8.22528	482.715	28.2204	24.222	8.22528	58.103	15.2356	5.63964	0.833572	-424.612	-12.9848	-18.5823	-7.39171	61.6124	17.7976	6.09587	0.833572	1840.39	531.619	182.086	24.8991	60.7789	0.986471
Jay County, Indiana	18075	6	21253	8.09752	4.40957	2.42487	0.202871	5.87303	2.78569	2.13569	0.202871	22.6032	3.85453	1.79332	0.316716	16.7301	1.06884	-0.342372	0.113844	24.8277	5.47842	2.0825	0.316716	1168.2	257.771	97.9863	14.9022	24.5109	0.987243
Jefferson County, Indiana	18077	5	32428	304.386	4.6257	1.33635	0.106491	300.987	2.14449	0.894491	0.106491	54.9846	5.88638	2.74136	0.48835	-246.002	3.74189	1.84687	0.381859	58.3835	8.36759	3.18322	0.48835	1800.4	258.036	98.1627	15.0595	57.8952	0.991635
Jennings County, Indiana	18079	5	28525	4.96281	3.88325	1.00481	0.04	1.96458	1.69454	0.615041	0.04	44.598	3.99302	2.52109	0.702804	42.6335	2.29849	1.90604	0.662804	47.5963	6.18173	2.91086	0.702804	1668.58	216.713	102.046	24.6382	46.8935	0.985234
Johnson County, Indiana	18081	2	139654	21.3406	14.3002	3.27207	0.193703	6.66725	3.58866	1.36453	0.193703	218.345	19.5492	12.3428	3.44082	211.678	15.9605	10.9783	3.24712	233.019	30.2608	14.2504	3.44082	1668.54	216.684	102.041	24.6382	229.578	0.985234
Knox County, Indiana	18083	5	38440	22.8918	13.228	9.0222	2.78736	18.4962	9.97232	8.44717	2.78736	65.1785	6.97769	3.2496	0.578887	46.6823	-2.99463	-5.19757	-2.20847	69.5741	10.2334	3.82463	0.578887	1809.94	266.217	99.4961	15.0595	68.9952	0.99168
Kosciusko County, Indiana	18085	5	77358	39.3716	28.5389	18.8229	5.53381	31.2474	22.6082	17.7668	5.53381	82.2703	14.0296	6.52726	1.15277	51.0229	-8.57858	-11.2395	-4.38104	90.3945	19.9603	7.58341	1.15277	1168.52	258.025	98.0301	14.9018	89.2418	0.987247
LaGrange County, Indiana	18087	6	37128	30.6639	27.0769	23.7641	7.6699	26.7676	24.2326	23.2576	7.6699	39.4867	6.73369	3.13284	0.553287	12.7191	-17.4989	-20.1247	-7.11662	43.383	9.57801	3.63936	0.553287	1168.47	257.973	98.0221	14.9022	42.8297	0.987246
Lake County, Indiana	18089	2	496005	1682.81	618.295	180.22	4.17134	1630.74	580.28	173.451	4.17134	860.845	225.729	83.5561	12.3501	-769.892	-354.551	-89.8946	8.17873	912.92	263.744	90.3259	12.3501	1840.55	531.737	182.107	24.8991	900.57	0.986472
LaPorte County, Indiana	18091	4	111467	208.744	37.488	28.033	8.72726	194.237	26.1448	23.7198	8.44826	193.457	50.728	18.7775	2.77543	-0.779616	24.5832	-4.94232	-5.67284	207.964	62.0711	23.0907	3.05443	1865.7	556.857	207.153	27.4021	204.909	0.985313
Lawrence County, Indiana	18093	5	46134	15.4143	6.42926	1.8831	0.0618999	10.5784	2.89907	1.25444	0.0618999	78.2244	8.37432	3.90002	0.694755	67.646	5.47524	2.64558	0.632855	83.0602	11.9045	4.52869	0.694755	1800.41	258.042	98.1637	15.0595	82.3655	0.991636
Madison County, Indiana	18095	2	131636	31.833	16.4164	4.0672	0.116917	18.0163	6.33019	2.27103	0.116917	122.607	18.4061	11.6135	3.22256	104.591	12.0759	9.34246	3.10564	136.424	28.4923	13.4097	3.22256	1036.37	216.448	101.869	24.4808	133.201	0.976378
Marion County, Indiana	18097	1	903393	294.52	112.434	24.3066	0.324236	199.226	42.7496	11.5337	0.160646	613.716	126.393	79.7763	22.1909	414.49	83.6432	68.2425	22.0302	709.01	196.077	92.5491	22.3545	784.83	217.045	102.446	24.745	686.656	0.968471
Marshall County, Indiana	18099	5	47051	12.7291	8.92361	5.00577	1.31971	7.78274	5.31274	4.36274	1.31971	50.0401	8.53337	3.97014	0.701162	42.2573	3.22063	-0.392597	-0.618551	54.9865	12.1442	4.61317	0.701162	1168.66	258.108	98.0462	14.9022	54.2853	0.987248
Martin County, Indiana	18101	6	10334	2.46534	1.58563	0.705715	0.0511122	1.36	0.775	0.55	0.046	17.5121	1.87475	0.873097	0.155535	16.1521	1.09975	0.323097	0.109535	18.6174	2.68538	1.02881	0.160647	1801.57	259.859	99.556	15.5455	18.4568	0.991371
Miami County, Indiana	18103	5	36903	30.1779	14.38	5.14758	0.342832	26.2954	11.5458	4.64286	0.342832	39.2474	6.69288	3.11386	0.549934	12.952	-4.85291	-1.529	0.207103	43.1299	9.52711	3.61858	0.549934	1168.74	258.166	98.0566	14.9022	42.58	0.987249
Monroe County, Indiana	18105	4	137974	26.0176	14.9541	3.49626	0.051	11.5376	4.38377	1.61387	0.051	233.939	25.0443	11.6635	2.07774	222.401	20.6606	10.0496	2.02674	248.419	35.6147	13.5459	2.07774	1800.48	258.126	98.1769	15.059	246.341	0.991636
Montgomery County, Indiana	18107	5	38124	10.0079	5.77512	2.01184	0.098	6.00107	2.85012	1.49095	0.098	35.5091	5.33072	3.36346	0.933308	29.508	2.4806	1.87251	0.835308	39.5159	8.25573	3.88435	0.933308	1036.51	216.549	101.887	24.4808	38.5826	0.976381
Morgan County, Indiana	18109	2	68894	46.6293	15.7738	6.78245	0.41254	39.3893	10.4887	5.84126	0.41254	107.714	9.644	6.08896	1.69742	68.3245	-0.844658	0.247706	1.28488	114.954	14.9292	7.03016	1.69742	1668.56	216.698	102.043	24.6382	113.256	0.985234
Newton County, Indiana	18111	2	14244	9.19509	7.86248	5.58792	1.58131	7.70288	6.77317	5.39394	1.58131	24.7213	6.48236	2.39952	0.354663	17.0184	-0.290808	-2.99442	-1.22665	26.2135	7.57168	2.5935	0.354663	1840.32	531.57	182.077	24.8991	25.8588	0.98647
Noble County, Indiana	18113	5	47536	18.24	13.4902	9.08977	2.61798	13.2384	9.83903	8.43955	2.61798	50.5559	8.62133	4.01106	0.708389	37.3175	-1.2177	-4.42849	-1.90959	55.5575	12.2725	4.66128	0.708389	1168.75	258.174	98.0579	14.9022	54.8492	0.987249
Ohio County, Indiana	18115	2	6128	1.42427	0.923937	0.409305	0.0909074	0.54	0.215	0.09	0.004	10.3906	1.11236	0.518042	0.0922846	9.85058	0.897364	0.428042	0.0882846	11.2749	1.8213	0.837347	0.179192	1839.89	297.21	136.643	29.2415	11.0957	0.984107
Orange County, Indiana	18117	6	19840	2.98633	2.16302	0.811223	0.05	0.9	0.64	0.54	0.05	33.6405	3.60139	1.67721	0.298781	32.7405	2.96139	1.13721	0.248781	35.7268	5.12441	1.94843	0.298781	1800.75	258.287	98.2074	15.0595	35.4281	0.991637
Owen County, Indiana	18119	4	21575	4.83595	2.66414	0.704573	0.017	2.57	1.01	0.41	0.017	36.5908	3.91724	1.82431	0.324984	34.0208	2.90724	1.41431	0.307984	38.8568	5.57138	2.11888	0.324984	1801.01	258.233	98.2099	15.063	38.5318	0.991636
Parke County, Indiana	18121	6	17339	4.8206	3.28817	1.79389	0.449312	2.99679	1.95679	1.55679	0.449312	18.4426	3.14504	1.46323	0.258418	15.4459	1.18825	-0.0935653	-0.190894	20.2665	4.47642	1.70032	0.258418	1168.84	258.171	98.0634	14.9039	20.008	0.987249
Perry County, Indiana	18123	6	19338	3.82106	2.36268	0.794038	0.039	1.79	0.88	0.53	0.039	32.7893	3.51026	1.63477	0.291221	30.9993	2.63026	1.10477	0.252221	34.8204	4.99294	1.89881	0.291221	1800.62	258.193	98.1907	15.0595	34.5292	0.991636
Pike County, Indiana	18125	5	12845	505.246	2.20972	0.645048	0.141502	503.803	1.14473	0.456563	0.141502	21.7799	2.33164	1.08588	0.193439	-482.023	1.18691	0.629313	0.051937	23.2229	3.39663	1.27436	0.193439	1807.93	264.432	99.2106	15.0595	23.0295	0.99167
Porter County, Indiana	18127	2	164343	731.87	217.343	61.9634	0.6175	714.613	204.745	59.72	0.6175	285.227	74.7916	27.6849	4.09199	-429.386	-129.953	-32.0351	3.47449	302.484	87.3893	29.9283	4.09199	1840.56	531.749	182.109	24.8991	298.392	0.986472
Posey County, Indiana	18129	3	25910	144.312	11.7248	6.74166	1.81974	141.59	9.73781	6.38781	1.81974	43.9328	4.70322	2.19035	0.390192	-97.657	-5.03459	-4.19746	-1.42955	46.6547	6.69021	2.5442	0.390192	1800.64	258.21	98.1936	15.0595	46.2645	0.991637
Pulaski County, Indiana	18131	6	13402	13.6599	11.7198	6.56518	1.8017	12.2506	10.691	6.38197	1.8017	14.2534	2.43064	1.13085	0.199719	2.00282	-8.2604	-5.25112	-1.60198	15.6627	3.45944	1.31406	0.199719	1168.68	258.129	98.0499	14.9022	15.463	0.987249
Putnam County, Indiana	18133	2	37963	13.6048	7.04463	2.12614	0.069	9.61175	4.12971	1.60705	0.069	35.3591	5.30821	3.34926	0.929366	25.7474	1.1785	1.74221	0.860366	39.3522	8.22313	3.86835	0.929366	1036.59	216.609	101.898	24.4808	38.4228	0.976383
Randolph County, Indiana	18135	6	26171	8.25953	4.33216	1.45744	0.061	5.51	2.325	1.1	0.061	27.8336	4.74648	2.2083	0.390004	22.3236	2.42148	1.1083	0.329004	30.5831	6.75364	2.56574	0.390004	1168.59	258.058	98.0374	14.9022	30.1931	0.987248
Ripley County, Indiana	18137	6	28818	5.50472	3.6373	1.0588	0.044	2.47884	1.4284	0.665438	0.044	48.8635	5.23109	2.43618	0.433985	46.3847	3.80269	1.77075	0.389985	51.8894	7.43998	2.82955	0.433985	1800.59	258.171	98.1868	15.0595	51.4554	0.991636
Rush County, Indiana	18139	6	17392	4.88381	3.22138	1.6771	0.126	3.06	1.89	1.44	0.126	29.4897	3.15702	1.47027	0.261915	26.4297	1.26702	0.030265	0.135915	31.3135	4.4884	1.70736	0.261915	1800.46	258.073	98.1693	15.0595	31.0516	0.991636
St. Joseph County, Indiana	18141	3	266931	76.4301	44.0125	19.7003	4.15734	48.4097	23.5576	16.0576	4.15734	283.887	48.4114	22.5233	3.97782	235.477	24.8538	6.46572	-0.179519	311.907	68.8662	26.166	3.97782	1168.49	257.993	98.0253	14.902	307.929	0.987247
Scott County, Indiana	18143	2	24181	5.07617	3.33081	0.689441	0.007	2.53386	1.47492	0.358941	0.007	41.0011	4.38937	2.04419	0.364154	38.4672	2.91445	1.68525	0.357154	43.5434	6.24526	2.37469	0.364154	1800.73	258.271	98.2046	15.0595	43.1792	0.991637
Shelby County, Indiana	18145	2	44436	15.3459	9.10969	3.28723	0.541108	10.6897	5.71063	2.68191	0.541108	69.4744	6.22029	3.92733	1.09482	58.7848	0.509663	1.24541	0.553715	74.1307	9.61935	4.53264	1.09482	1668.26	216.477	102.004	24.6382	73.0359	0.985231
Spencer County, Indiana	18147	6	20952	850.542	3.93559	2.11747	0.578604	848.345	2.33188	1.83188	0.578604	35.526	3.80324	1.77122	0.315527	-812.819	1.47136	-0.0606607	-0.263077	37.7229	5.40695	2.05681	0.315527	1800.44	258.064	98.1676	15.0595	37.4074	0.991636
Starke County, Indiana	18149	6	23363	10.309	8.21868	6.20134	2.08466	7.86342	6.43342	5.88342	2.08466	24.8472	4.23721	1.97136	0.348159	16.9838	-2.19621	-3.91206	-1.73651	27.2928	6.02247	2.28928	0.348159	1168.21	257.778	97.9875	14.9022	26.9446	0.987244
Steuben County, Indiana	18151	5	34185	9.27326	6.10997	2.88086	0.580332	5.68089	3.48753	2.41385	0.580332	36.3567	6.19994	2.88451	0.50943	30.6758	2.7124	0.470667	-0.0709017	39.9491	8.82238	3.35152	0.50943	1168.61	258.077	98.0408	14.9022	39.4397	0.987248
Sullivan County, Indiana	18153	4	21475	274.322	7.51147	4.19161	1.29763	271.261	5.17336	3.78569	1.29763	36.4128	3.89818	1.81543	0.323403	-234.848	-1.27519	-1.97026	-0.974227	39.4741	6.23628	2.22134	0.323403	1838.14	290.397	103.439	15.0595	39.1507	0.991807
Switzerland County, Indiana	18155	6	10613	19.6017	2.18341	0.519	0.0160985	18.4963	1.37649	0.375302	0.0160985	17.9953	1.92649	0.89719	0.159826	-0.500985	0.549996	0.521887	0.143728	19.1007	2.73341	1.04089	0.159826	1799.74	257.553	98.0766	15.0595	18.9408	0.991632
Tippecanoe County, Indiana	18157	4	172780	50.5502	25.6944	6.82302	0.357732	32.3949	12.4411	4.46283	0.357732	183.756	31.3361	14.5791	2.5748	151.361	18.895	10.1163	2.21706	201.912	44.5894	16.9393	2.5748	1168.61	258.071	98.0396	14.9022	199.337	0.987248
Tipton County, Indiana	18159	6	15936	3.41564	2.11925	0.791154	0.0481122	1.74382	0.898817	0.573817	0.0481122	16.9484	2.89022	1.34467	0.237481	15.2046	1.9914	0.770855	0.189369	18.6202	4.11065	1.56201	0.237481	1168.44	257.948	98.0177	14.9022	18.3827	0.987246
Union County, Indiana	18161	2	7516	1.37137	0.895001	0.314178	0.017	0.57	0.31	0.21	0.017	12.7441	1.36432	0.635379	0.113187	12.1741	1.05432	0.425379	0.0961872	13.5454	1.94932	0.739557	0.113187	1802.21	259.356	98.3977	15.0595	13.4322	0.991644
Vanderburgh County, Indiana	18163	3	179703	45.3151	24.4983	5.47025	0.108336	26.4415	10.7206	3.01667	0.108336	304.703	32.62	15.1915	2.70624	278.261	21.8994	12.1749	2.5979	323.576	46.3978	17.6451	2.70624	1800.62	258.191	98.1904	15.0595	320.87	0.991636
Vermillion County, Indiana	18165	4	16212	336.864	4.54299	1.74373	0.287488	335.164	3.30239	1.5228	0.287488	17.2419	2.94028	1.36796	0.241594	-317.922	-0.362116	-0.154844	-0.0458945	18.9414	4.18088	1.58889	0.241594	1168.36	257.888	98.007	14.9022	18.6998	0.987245
Vigo County, Indiana	18167	4	107848	344.7	15.8889	4.75576	0.753698	332.564	6.92451	3.16998	0.753698	114.699	19.5598	9.10016	1.60717	-217.864	12.6353	5.93019	0.85347	126.836	28.5241	10.686	1.60717	1176.06	264.485	99.0834	14.9022	125.229	0.987329
Wabash County, Indiana	18169	5	32888	10.9855	6.53178	3.11756	0.369717	7.54511	4.02031	2.67031	0.369717	34.9773	5.96471	2.77507	0.490102	27.4322	1.9444	0.104766	0.120385	38.4177	8.47618	3.22232	0.490102	1168.14	257.729	97.9786	14.9022	37.9276	0.987243
Warren County, Indiana	18171	6	8508	2.76481	1.67732	0.813469	0.0827854	1.86672	1.02172	0.696717	0.0827854	9.0485	1.54305	0.717901	0.126788	7.18178	0.52133	0.0211838	0.0440022	9.94659	2.19865	0.834653	0.126788	1169.09	258.422	98.1021	14.9022	9.8198	0.987253
Warrick County, Indiana	18173	3	59689	847.816	269.216	76.5308	0.0356435	841.519	264.614	75.7118	0.0356435	101.208	10.8348	5.04592	0.898887	-740.311	-253.779	-70.6659	0.863243	107.505	15.4366	5.86491	0.898887	1801.09	258.617	98.2578	15.0595	106.606	0.991639
Washington County, Indiana	18175	2	28262	7.39083	4.97113	1.67381	0.088	4.42023	2.80259	1.28763	0.088	47.9208	5.13016	2.38918	0.425612	43.5006	2.32757	1.10155	0.337612	50.8914	7.2987	2.77536	0.425612	1800.7	258.251	98.2011	15.0595	50.4658	0.991637
Wayne County, Indiana	18177	5	68917	18.3768	8.9309	2.38691	0.0718951	11.1368	3.64571	1.44571	0.0718951	116.855	12.5099	5.82603	1.03786	105.718	8.86421	4.38031	0.965961	124.095	17.7951	6.76722	1.03786	1800.64	258.211	98.1938	15.0595	123.057	0.991637
Wells County, Indiana	18179	3	27636	11.3815	5.52811	1.8372	0.068	8.48	3.41	1.46	0.068	29.3917	5.01218	2.33191	0.411836	20.9117	1.60218	0.871912	0.343836	32.2932	7.13029	2.70911	0.411836	1168.52	258.007	98.0283	14.9022	31.8813	0.987247
White County, Indiana	18181	6	24643	14.4791	7.51254	4.56213	0.939073	11.8953	5.62641	4.22624	0.939073	26.2085	4.46936	2.07936	0.367234	14.3132	-1.15705	-2.14688	-0.571839	28.7923	6.35548	2.41525	0.367234	1168.37	257.902	98.0096	14.9022	28.425	0.987245
Whitley County, Indiana	18183	3	33292	8.2267	4.68288	1.5855	0.132795	4.51	1.91	0.91	0.051	35.407	6.03798	2.80916	0.496123	30.897	4.12798	1.89916	0.445123	39.1237	8.81086	3.48466	0.577918	1175.17	264.654	104.67	17.3591	38.5458	0.985228
Adair County, Iowa	19001	6	7682	24.3081	2.70284	1.30271	0.136593	23.6172	2.1985	1.21289	0.136593	7.0554	2.84513	2.44814	0.765033	-16.5618	0.646631	1.23525	0.62844	7.74628	3.34948	2.53796	0.765033	1008.37	436.016	330.377	99.5877	6.98125	0.901239
Adams County, Iowa	19003	6	4029	2.66027	1.79004	1.01266	0.0800004	1.90035	1.185	0.91	0.0800004	3.70037	1.49219	1.28398	0.401239	1.80001	0.307192	0.373983	0.321238	4.46029	2.09723	1.38664	0.401239	1107.05	520.533	344.165	99.5877	4.05905	0.910042
Allamakee County, Iowa	19005	6	14330	154.794	3.60537	2.3145	0.323584	153.509	2.66735	2.14745	0.323584	17.2788	5.31276	4.57222	1.43255	-136.23	2.64541	2.42477	1.10897	18.5638	6.25078	4.73927	1.43255	1295.45	436.202	330.724	99.9687	17.1312	0.922831
Appanoose County, Iowa	19007	6	12887	15.958	9.24252	6.17115	0.507274	14.7974	8.39527	6.02027	0.507274	11.8358	4.77287	4.1069	1.28339	-2.96156	-3.62241	-1.91337	0.776112	12.9965	5.62011	4.25778	1.28339	1008.49	436.107	330.393	99.5877	11.7131	0.901251
Audubon County, Iowa	19009	6	6119	6.58621	2.7322	2.26081	0.215225	5.97827	2.28122	2.18122	0.215225	14.126	2.26826	1.95205	0.611388	8.14773	-0.0129624	-0.229177	0.396163	14.7339	2.71924	2.03163	0.611388	2407.9	444.393	332.02	99.9163	14.1225	0.958505
Benton County, Iowa	19011	3	26076	5.38992	3.89011	2.02163	0.171515	3.04106	2.17544	1.71628	0.171515	23.9491	9.65758	8.31004	2.59685	20.908	7.48214	6.59376	2.42533	26.2979	11.3722	8.6154	2.59685	1008.51	436.119	330.396	99.5877	23.7011	0.901253
Black Hawk County, Iowa	19013	4	131090	63.0167	27.2905	7.05681	0.204454	51.231	18.6869	5.52467	0.204454	158.065	48.6008	41.8264	13.1049	106.834	29.9139	36.3018	12.9004	169.851	57.2044	43.3586	13.1049	1295.68	436.375	330.754	99.9687	156.746	0.922845
Boone County, Iowa	19015	5	26306	5.71076	3.44174	1.39914	0.125242	3.34809	1.71699	1.09199	0.125242	24.1603	9.74277	8.38334	2.61975	20.8122	8.02578	7.29135	2.49451	26.523	11.4675	8.69049	2.61975	1008.25	435.928	330.361	99.5877	23.9032	0.901227
Bremer County, Iowa	19017	4	24276	6.53374	4.50069	1.80652	0.130771	4.35064	2.90702	1.52272	0.130771	29.2715	9.00018	7.74566	2.42684	24.9208	6.09316	6.22294	2.29607	31.4546	10.5939	8.02946	2.42684	1295.71	436.392	330.757	99.9687	29.0277	0.922846
Buchanan County, Iowa	19019	6	20958	6.77191	4.82585	2.88007	0.241186	4.879	3.4403	2.62197	0.236074	25.2707	7.77005	6.687	2.09514	20.3917	4.32976	4.06503	1.85907	27.1636	9.15561	6.9451	2.10026	1296.1	436.855	331.382	100.213	25.0633	0.922681
Buena Vista County, Iowa	19021	5	20260	50.7423	7.29322	4.72394	0.424613	48.8355	5.87894	4.40394	0.39394	46.7712	7.51021	6.46323	2.0243	-2.06438	1.63127	2.05929	1.63037	48.6779	8.92449	6.78322	2.05498	2402.66	440.498	334.809	101.43	46.6229	0.957784
Butler County, Iowa	19023	6	14867	8.63449	6.47317	3.21896	0.260449	7.29417	5.49473	3.04471	0.260449	17.9263	5.51185	4.74356	1.48623	10.6321	0.0171239	1.69885	1.22579	19.2666	6.49029	4.9178	1.48623	1295.93	436.557	330.787	99.9687	17.7804	0.92286
Calhoun County, Iowa	19025	6	9670	4.13862	3.17893	2.33191	0.228561	3.19908	2.48408	2.20908	0.228561	23.4941	3.77253	3.24661	1.01685	20.295	1.28844	1.03752	0.788287	24.4336	4.46737	3.36944	1.01685	2526.74	461.983	348.442	105.155	23.4168	0.958383
Carroll County, Iowa	19027	6	20816	77.6265	7.55644	5.779	0.579082	75.7475	6.18472	5.53472	0.579082	48.0547	7.71632	6.6406	2.07986	-27.6927	1.5316	1.10588	1.50078	49.9338	9.08804	6.88488	2.07986	2398.82	436.589	330.749	99.9163	47.8539	0.958348
Cass County, Iowa	19029	6	13956	49.6284	3.24324	1.76107	0.188446	47.7769	1.81445	1.51445	0.188446	12.8177	5.16879	4.44758	1.38985	-34.9593	3.35434	2.93313	1.2014	14.6691	6.59758	4.6942	1.38985	1051.1	472.741	336.357	99.5877	13.2792	0.905253
Cedar County, Iowa	19031	6	18499	7.32163	5.61419	2.22684	0.166574	5.64971	4.39367	2.00949	0.166574	16.9901	6.85135	5.89536	1.84227	11.3404	2.45768	3.88587	1.6757	18.662	8.07187	6.11272	1.84227	1008.81	436.341	330.435	99.5877	16.8197	0.901282
Cerro Gordo County, Iowa	19033	5	44151	62.6212	7.47543	2.59472	0.215886	58.6557	4.58061	2.0792	0.215886	101.925	16.3664	14.0848	4.41141	43.2689	11.7858	12.0056	4.19552	105.89	19.2612	14.6003	4.41141	2398.36	436.258	330.69	99.9163	101.479	0.95834
Cherokee County, Iowa	19035	6	12072	9.41458	5.72632	3.70177	0.377244	8.04671	4.65317	3.28354	0.275	27.8688	4.47499	3.85114	1.20619	19.8221	-0.178184	0.5676	0.93119	29.2366	5.54814	4.26937	1.30843	2421.86	459.587	353.659	108.386	27.9282	0.955247
Chickasaw County, Iowa	19037	6	12439	6.01142	3.94995	2.62846	0.24474	4.89226	3.13297	2.48297	0.24474	14.9987	4.61169	3.96887	1.24351	10.1064	1.47872	1.4859	0.998771	16.1178	5.42867	4.11436	1.24351	1295.75	436.423	330.763	99.9687	14.8743	0.922849
Clarke County, Iowa	19039	6	9286	3.33717	2.1172	1.14698	0.087	2.49435	1.50194	1.03741	0.087	8.52857	3.43919	2.95931	0.924771	6.03422	1.93725	1.92191	0.837771	9.37139	4.05445	3.06888	0.924771	1009.2	436.62	330.485	99.5877	8.44662	0.90132
Clay County, Iowa	19041	5	16667	7.25613	4.09264	2.56747	0.269109	5.76392	3.00332	2.37348	0.269109	38.4766	6.17832	5.31701	1.66531	32.7126	3.17499	2.94353	1.3962	39.9688	7.26763	5.511	1.66531	2398.08	436.049	330.653	99.9163	38.3035	0.958335
Clayton County, Iowa	19043	6	18129	9.78199	8.11684	6.17642	0.569015	7.40551	6.28501	5.86001	0.569015	21.8595	6.72122	5.78436	1.81233	14.454	0.436203	-0.0756568	1.24332	24.236	8.55304	6.10076	1.81233	1336.86	471.788	336.519	99.9687	22.4237	0.925222
Clinton County, Iowa	19045	5	49116	48.5275	14.2925	5.05112	0.266966	44.106	11.0648	4.47633	0.266966	45.1098	18.1907	15.6526	4.89135	1.00376	7.12593	11.1762	4.62438	49.5312	21.4184	16.2274	4.89135	1008.45	436.079	330.388	99.5877	44.6399	0.901247
Crawford County, Iowa	19047	6	17096	10.047	5.98874	3.66026	0.308561	8.49954	4.85908	3.45908	0.308561	39.4669	6.33734	5.45387	1.70817	30.9674	1.47826	1.99478	1.39961	41.0144	7.467	5.65504	1.70817	2399.06	436.769	330.781	99.9163	39.3062	0.958352
Dallas County, Iowa	19049	3	66135	8.25097	5.85717	1.94271	0.212254	2.30977	1.5201	1.17036	0.212254	60.7406	24.494	21.0763	6.58623	58.4308	22.9739	19.9059	6.37398	66.6818	28.831	21.8486	6.58623	1008.27	435.942	330.364	99.5877	60.0955	0.901229
Davis County, Iowa	19051	5	8753	2.75703	2.1188	1.3172	0.112001	1.96947	1.54388	1.21482	0.112001	8.03904	3.24179	2.78945	0.871691	6.06957	1.69791	1.57464	0.75969	8.82661	3.81671	2.89184	0.871691	1008.41	436.046	330.382	99.5877	7.95492	0.901243
Decatur County, Iowa	19053	6	8457	2.43308	1.80734	1.08201	0.0900089	1.67315	1.25259	0.98322	0.0900089	7.76719	3.13216	2.69512	0.842213	6.09403	1.87957	1.7119	0.752204	8.52711	3.68691	2.79391	0.842213	1008.29	435.959	330.367	99.5877	7.6849	0.901231
Delaware County, Iowa	19055	6	17764	12.2938	10.0035	8.1727	0.776342	10.4561	8.63146	7.93146	0.776342	16.315	6.57913	5.66113	1.76908	5.85891	-2.05233	-2.27033	0.992733	18.1527	7.95113	5.90237	1.76908	1021.88	447.598	332.266	99.5877	16.3836	0.902545
Des Moines County, Iowa	19057	5	40325	59.8334	7.49613	2.48287	0.316001	56.2135	4.85361	2.01229	0.316001	37.0358	14.9349	12.851	4.01587	-19.1777	10.0813	10.8387	3.69987	40.6557	17.5774	13.3216	4.01587	1008.2	435.893	330.355	99.5877	36.6398	0.901222
Dickinson County, Iowa	19059	5	16667	13.5473	8.20588	6.55227	0.699869	12.0413	7.10648	6.35648	0.699869	38.4766	6.17832	5.31701	1.66531	26.4352	-0.928165	-1.03947	0.965437	39.9826	7.27772	5.51279	1.66531	2398.91	436.654	330.761	99.9163	38.3173	0.958349
Dubuque County, Iowa	19061	4	93653	32.3313	16.0377	6.94281	0.510609	23.903	9.8851	5.84714	0.510609	86.014	34.6856	29.8459	9.32668	62.111	24.8005	23.9987	8.81607	94.4422	40.8382	30.9415	9.32668	1008.43	436.059	330.385	99.5877	85.1155	0.901245
Emmet County, Iowa	19063	6	10302	4.75134	3.59838	2.14772	0.190338	3.81177	2.91249	2.02557	0.190338	23.7827	3.81887	3.28648	1.02934	19.9709	0.906376	1.26091	0.839	24.7222	4.50475	3.40863	1.02934	2399.75	437.27	330.871	99.9163	23.6929	0.958364
Fayette County, Iowa	19065	6	20880	6.81465	5.39653	3.60585	0.361346	4.93555	4.02479	3.36157	0.361346	25.1766	7.74114	6.66211	2.08735	20.2411	3.71635	3.30054	1.726	27.0557	9.11288	6.90639	2.08735	1295.77	436.44	330.766	99.9687	24.9684	0.92285
Floyd County, Iowa	19067	6	16303	29.1224	3.73474	2.0213	0.226734	27.6578	2.66559	1.83091	0.226734	19.6578	6.04424	5.20174	1.62979	-8.00001	3.37865	3.37083	1.40306	21.1224	7.11338	5.39214	1.62979	1295.61	436.324	330.745	99.9687	19.4926	0.922841
Franklin County, Iowa	19069	6	10680	48.0765	5.29875	4.1162	0.421716	47.1093	4.59269	3.99046	0.421716	24.6553	3.95899	3.40707	1.06711	-22.454	-0.633703	-0.583389	0.64539	25.6225	4.66504	3.53281	1.06711	2399.11	436.802	330.787	99.9163	24.5554	0.958353
Fremont County, Iowa	19071	6	7441	3.79038	3.02258	2.39137	0.478742	3.11336	2.52836	2.30336	0.478742	17.1779	2.75832	2.37379	0.743478	14.0645	0.229961	0.0704291	0.264736	17.8549	3.25254	2.4618	0.743478	2399.53	437.111	330.842	99.9163	17.1114	0.95836
Greene County, Iowa	19073	6	9336	8.30243	6.14142	2.19595	0.179461	3.41129	2.04462	1.51962	0.179461	8.57449	3.45771	2.97525	0.92975	5.16319	1.41309	1.45563	0.75029	13.4656	7.55451	3.65158	0.92975	1442.33	809.181	391.129	99.5877	12.5359	0.930954
Grundy County, Iowa	19075	4	12453	3.42505	2.71998	1.8902	0.190682	2.29208	1.89291	1.74291	0.190682	15.0155	4.61688	3.97334	1.24491	12.7235	2.72397	2.23043	1.05423	16.1485	5.44395	4.12062	1.24491	1296.76	437.159	330.894	99.9687	14.9036	0.922909
Guthrie County, Iowa	19077	3	10954	13.124	3.18929	2.0257	0.291329	12.143	2.47317	1.89817	0.291329	10.0605	4.05696	3.49088	1.09088	-2.08248	1.58379	1.59271	0.799554	11.0415	4.77308	3.61841	1.09088	1007.99	435.738	330.328	99.5877	9.95062	0.901202
Hamilton County, Iowa	19079	6	15673	24.9521	4.85149	3.40912	0.3402	23.5289	3.8126	3.22411	0.3402	14.3946	5.8047	4.99476	1.56084	-9.13432	1.9921	1.77065	1.22064	15.8177	6.84359	5.17977	1.56084	1009.23	436.649	330.49	99.5877	14.2569	0.901324
Hancock County, Iowa	19081	6	11341	6.66892	5.56917	3.19386	0.323683	5.6464	4.82272	3.06093	0.323683	26.1812	4.20401	3.61794	1.13315	20.5348	-0.61871	0.557007	0.809468	27.2037	4.95046	3.75087	1.13315	2398.71	436.51	330.735	99.9163	26.0706	0.958346
Hardin County, Iowa	19083	6	17534	13.1921	9.83753	6.81782	0.603112	11.6169	8.68766	6.61305	0.603112	16.1038	6.49394	5.58783	1.74617	4.48691	-2.19372	-1.02521	1.14306	17.679	7.64382	5.7926	1.74617	1008.27	435.943	330.364	99.5877	15.9328	0.901229
Harrison County, Iowa	19085	3	14928	15.309	13.8655	11.2211	3.76734	11.8271	11.0471	10.7471	3.76734	34.4782	5.53628	4.76448	1.49225	22.651	-5.51087	-5.98267	-2.27509	37.96	8.35462	5.23839	1.49225	2542.87	559.661	350.911	99.9632	36.4677	0.960689
Henry County, Iowa	19087	6	20145	5.20904	3.16141	1.42083	0.0940584	3.39904	1.84011	1.18553	0.0940584	18.5018	7.46096	6.41992	2.00619	15.1028	5.62085	5.23439	1.91214	20.3118	8.78226	6.65522	2.00619	1008.28	435.952	330.366	99.5877	18.3056	0.90123
Howard County, Iowa	19089	6	9566	39.199	5.35617	2.54022	0.227665	38.3285	4.72064	2.42704	0.227665	11.5345	3.54654	3.05219	0.956301	-26.794	-1.17411	0.625149	0.728636	12.405	4.18206	3.16537	0.956301	1296.78	437.18	330.897	99.9687	11.4487	0.92291
Humboldt County, Iowa	19091	6	9815	4.47717	3.45341	1.35996	0.09	3.59283	2.80783	1.245	0.09	22.6561	3.63797	3.13081	0.980579	19.0633	0.830135	1.88581	0.890579	23.5404	4.28354	3.24577	0.980579	2398.41	436.428	330.695	99.9061	22.5598	0.958345
Ida County, Iowa	19093	6	7089	4.72939	2.93278	1.92644	0.163112	4.09382	2.46882	1.84382	0.163112	16.3653	2.62783	2.26149	0.708307	12.2715	0.159016	0.417675	0.545195	17.0009	3.0918	2.34412	0.708307	2398.2	436.14	330.67	99.9163	16.2926	0.958337
Iowa County, Iowa	19095	6	16355	5.15709	3.52099	2.14901	0.239907	3.6787	2.44177	1.95682	0.239907	15.021	6.05729	5.2121	1.62876	11.3423	3.61552	3.25528	1.38885	16.4994	7.13651	5.40429	1.62876	1008.83	436.351	330.437	99.5877	14.8706	0.901284
Jackson County, Iowa	19097	6	19848	5.22424	3.76462	2.32696	0.206412	3.42807	2.45341	2.09346	0.206412	18.2291	7.35096	6.32527	1.97662	14.801	4.89756	4.23181	1.7702	20.0252	8.66217	6.55877	1.97662	1008.93	436.426	330.45	99.5877	18.0486	0.901294
Jasper County, Iowa	19099	5	36842	11.9009	6.78058	3.16597	0.271907	8.35	4.125	2.5	0.185	33.8369	13.6449	11.741	3.66901	25.4869	9.51991	9.24101	3.48401	37.3878	16.3005	12.407	3.75592	1014.81	442.443	336.762	101.947	33.6319	0.899542
Jefferson County, Iowa	19101	5	16843	3.61274	2.28078	0.959186	0.061	2.01	1.1	0.75	0.061	15.4692	6.23802	5.36762	1.67736	13.4592	5.13802	4.61762	1.61636	17.0719	7.4188	5.57681	1.67736	1013.59	440.468	331.105	99.5877	15.3946	0.901748
Johnson County, Iowa	19103	4	130882	18.9578	13.6523	4.74858	0.361871	7.1997	5.06885	3.22002	0.361871	120.206	48.4738	41.7102	13.0342	113.007	43.405	38.4902	12.6724	131.964	57.0573	43.2388	13.0342	1008.27	435.944	330.364	99.5877	118.93	0.901229
Jones County, Iowa	19105	3	20638	6.49599	4.94324	2.44293	0.20145	4.6445	3.59164	2.20224	0.20145	18.9546	7.64355	6.57703	2.05529	14.3101	4.05191	4.3748	1.85384	20.8061	8.99515	6.81773	2.05529	1008.15	435.854	330.348	99.5877	18.7508	0.901217
Keokuk County, Iowa	19107	6	10511	4.66511	3.28066	1.86098	0.149	3.71173	2.58469	1.73704	0.149	9.65365	3.89288	3.3497	1.04677	5.94192	1.3082	1.61266	0.897766	10.607	4.58885	3.47364	1.04677	1009.14	436.576	330.477	99.5877	9.56026	0.901314
Kossuth County, Iowa	19109	6	15543	12.5787	7.26865	5.66682	0.625268	11.1832	6.24993	5.4854	0.625268	35.8817	5.76166	4.95844	1.553	24.6985	-0.488273	-0.526966	0.927732	37.2772	6.78037	5.13985	1.553	2398.33	436.233	330.686	99.9163	35.7242	0.958339
Lee County, Iowa	19111	5	35862	65.1434	16.547	5.62184	0.45808	61.9241	14.1969	5.20333	0.45808	32.9368	13.282	11.4287	3.57141	-28.9872	-0.914959	6.22537	3.11333	36.1562	15.6321	11.8472	3.57141	1008.2	435.895	330.356	99.5877	32.5847	0.901223
Linn County, Iowa	19113	3	211226	109.582	42.9298	11.1584	0.356201	90.6112	29.0814	8.69226	0.356201	193.997	78.2303	67.3147	21.0355	103.386	49.1489	58.6224	20.6793	212.967	92.0787	69.7808	21.0355	1008.24	435.925	330.361	99.5877	191.932	0.901227
Louisa County, Iowa	19115	6	11387	198.477	8.29665	6.90552	2.01678	197.441	7.54018	6.77081	2.01678	10.4582	4.21732	3.62887	1.134	-186.982	-3.32286	-3.14194	-0.882771	11.4945	4.9738	3.76359	1.134	1009.44	436.796	330.516	99.5877	10.3605	0.901343
Lucas County, Iowa	19117	6	8898	2.10137	1.495	0.864178	0.07	1.3	0.91	0.76	0.07	8.17222	3.29549	2.83566	0.886131	6.87222	2.38549	2.07566	0.816131	8.97359	3.88049	2.93984	0.886131	1008.49	436.108	330.394	99.5877	8.08746	0.901251
Lyon County, Iowa	19119	6	11581	10.2987	7.99789	6.59285	0.689245	9.24861	7.23134	6.45634	0.689245	26.7353	4.29298	3.6945	1.15713	17.4867	-2.93836	-2.76183	0.467886	27.7854	5.05953	3.83101	1.15713	2399.22	436.882	330.802	99.9163	26.6282	0.958355
Madison County, Iowa	19121	3	15679	3.62495	2.82289	1.37646	0.1349	2.20181	1.78399	1.19145	0.1349	14.4001	5.80692	4.99667	1.56144	12.1983	4.02293	3.80522	1.42654	15.8233	6.84582	5.18168	1.56144	1009.2	436.624	330.485	99.5877	14.2618	0.90132
Mahaska County, Iowa	19123	5	22381	6.08015	4.35775	2.65761	0.228224	3.98	2.81	2.36	0.218	20.5554	8.28909	7.1325	2.22887	16.5754	5.47909	4.7725	2.01087	22.6556	9.83685	7.43011	2.2391	1012.27	439.518	331.983	100.044	20.4165	0.901168
Marion County, Iowa	19125	6	33309	8.18947	3.85013	1.29124	0.0691258	5.19123	1.66142	0.901469	0.0691258	30.5921	12.3364	10.6151	3.31717	25.4008	10.675	9.71363	3.24804	33.5903	14.5251	11.0049	3.31717	1008.45	436.072	330.387	99.5877	30.2731	0.901246
Marshall County, Iowa	19127	5	40648	39.5083	9.64525	3.25106	0.203947	35.8607	6.98249	2.77687	0.203947	37.3325	15.0545	12.9539	4.04804	1.47179	8.07203	10.1771	3.84409	40.9801	17.7173	13.4281	4.04804	1008.17	435.871	330.351	99.5877	36.932	0.901219
Mills County, Iowa	19129	3	15059	3.45999	2.07685	0.670565	0.0712342	1.80198	0.826984	0.451984	0.0712342	34.7644	5.58225	4.80404	1.50464	32.9624	4.75526	4.35205	1.43341	36.4224	6.83211	5.02262	1.50464	2418.65	453.689	333.529	99.9163	34.9178	0.958689
Mitchell County, Iowa	19131	6	10776	8.95305	6.53555	3.45084	0.274506	7.98578	5.82943	3.3251	0.274506	12.9886	3.99365	3.43699	1.07686	5.00286	-1.83578	0.111887	0.802357	13.9559	4.69978	3.56273	1.07686	1295.09	436.134	330.617	99.9316	12.879	0.922838
Monona County, Iowa	19133	6	9243	22.9902	21.7059	19.466	6.86856	20.1577	19.3777	19.0777	6.86856	21.3379	3.4263	2.94865	0.923527	1.18017	-15.9514	-16.1291	-5.94503	24.1703	5.75443	3.3369	0.923527	2614.99	622.571	361.019	99.9163	23.2468	0.961791
Monroe County, Iowa	19135	6	7970	3.92191	2.14084	0.970482	0.061	3.20343	1.61635	0.87708	0.061	7.31991	2.95179	2.53992	0.793714	4.11648	1.33544	1.66284	0.732714	8.03839	3.47628	2.63333	0.793714	1008.58	436.171	330.405	99.5877	7.24467	0.90126
Montgomery County, Iowa	19137	6	10740	3.22246	1.91985	0.93955	0.0691127	2.25529	1.21382	0.813817	0.0691127	24.7938	3.98123	3.42621	1.0731	22.5385	2.76741	2.6124	1.00399	25.761	4.68726	3.55195	1.0731	2398.6	436.431	330.721	99.9163	24.6879	0.958344
Muscatine County, Iowa	19139	5	42745	125.161	35.4132	12.3572	1.40135	121.306	32.5992	11.8561	1.40135	39.2584	15.8312	13.6222	4.25687	-82.0475	-16.768	1.76612	2.85552	43.1133	18.6452	14.1233	4.25687	1008.62	436.197	330.409	99.5877	38.8564	0.901263
O'Brien County, Iowa	19141	6	14398	9.32167	6.37101	4.59174	0.424673	4.0829	1.4829	0.482901	0.0306732	33.2385	5.33722	4.59317	1.4386	29.1556	3.85432	4.11027	1.40792	38.4772	10.2253	8.70201	1.8326	2672.4	710.191	604.39	127.281	36.6446	0.952372
Osceola County, Iowa	19143	6	6462	9.82573	6.94733	4.74872	0.512035	9.24538	6.52367	4.67327	0.512035	14.9178	2.39541	2.06147	0.645659	5.67245	-4.12826	-2.6118	0.133624	15.4982	2.81907	2.13692	0.645659	2398.36	436.253	330.689	99.9163	14.8525	0.95834
Page County, Iowa	19145	6	15932	4.94833	3.29534	1.04831	0.0510119	2.14353	1.07001	0.670012	0.0510119	36.7798	5.90586	5.08253	1.59187	34.6362	4.83585	4.41252	1.54086	39.5846	8.13119	5.46084	1.59187	2484.6	510.368	342.759	99.9163	37.9927	0.959786
Palo Alto County, Iowa	19147	6	9421	6.8979	5.68714	4.79816	0.763314	6.04126	5.06179	4.68679	0.763314	21.7488	3.49229	3.00543	0.941312	15.7076	-1.56951	-1.68136	0.177998	22.6055	4.11763	3.1168	0.941312	2399.48	437.07	330.835	99.9163	21.6641	0.958359
Plymouth County, Iowa	19149	4	24986	15.2179	11.4968	8.6721	1.20668	12.9658	9.85275	8.37932	1.20668	57.6814	9.2621	7.97089	2.49651	44.7156	-0.590651	-0.408432	1.28983	59.9335	10.9062	8.26367	2.49651	2398.68	436.491	330.732	99.9163	57.437	0.958345
Pocahontas County, Iowa	19151	6	7310	71.2375	2.63435	1.77803	0.186445	70.5743	2.1502	1.69182	0.186445	16.8755	2.70976	2.33199	0.730389	-53.6988	0.559561	0.640178	0.543944	17.5387	3.19391	2.41821	0.730389	2399.27	436.923	330.809	99.9163	16.8083	0.958356
Polk County, Iowa	19153	3	430640	97.4066	43.8518	10.2897	0.31613	58.7197	15.6104	5.26036	0.31613	395.514	159.493	137.239	42.8864	336.794	143.883	131.978	42.5703	434.201	187.735	142.268	42.8864	1008.27	435.943	330.364	99.5877	391.314	0.901229
Pottawattamie County, Iowa	19155	3	93158	943.135	15.0543	5.48692	0.713616	934.389	8.62121	4.34621	0.713616	215.043	34.5303	29.7165	9.30731	-719.345	25.9091	25.3703	8.59369	223.789	40.9634	30.8572	9.30731	2402.26	439.719	331.235	99.9088	214.482	0.95841
Poweshiek County, Iowa	19157	6	18914	4.86007	3.20296	1.55129	0.113206	3.14678	1.95226	1.32856	0.113206	17.3712	7.00505	6.02762	1.8836	14.2245	5.05279	4.69906	1.77039	19.0845	8.25575	6.25035	1.8836	1009.02	436.489	330.461	99.5877	17.2009	0.901302
Ringgold County, Iowa	19159	6	5131	2.36007	2.02959	1.3081	0.126337	1.31	1.18	1.13	0.111	4.71248	1.90033	1.63518	0.510984	3.40248	0.720332	0.505175	0.399984	5.76255	2.74992	1.81327	0.526321	1123.09	535.943	353.396	102.577	5.23623	0.908665
Sac County, Iowa	19161	6	10350	12.4404	10.4088	5.33002	0.526029	11.5146	9.73302	5.20967	0.526029	23.8935	3.83666	3.3018	1.03413	12.3788	-5.89636	-1.90788	0.508105	24.8192	4.51244	3.42214	1.03413	2397.99	435.984	330.642	99.9163	23.7851	0.958333
Scott County, Iowa	19163	3	165224	63.3181	20.1195	5.29435	0.278214	48.4651	9.27678	3.36346	0.278214	151.747	61.1929	52.6545	16.4543	103.282	51.9161	49.291	16.1761	166.6	72.0355	54.5854	16.4543	1008.33	435.987	330.372	99.5877	150.146	0.901235
Shelby County, Iowa	19165	6	12167	5.10506	3.49426	1.95647	0.169449	3.39179	2.155	1.68	0.149001	28.0881	4.5102	3.88145	1.21568	24.6963	2.3552	2.20145	1.06668	29.8014	5.84946	4.15792	1.23613	2449.36	480.765	341.737	101.597	28.5652	0.958521
Sioux County, Iowa	19167	6	33704	29.516	22.2603	17.9615	2.70964	26.4763	20.0413	17.5663	2.70964	77.8073	12.4938	10.7521	3.36758	51.3309	-7.54753	-6.81427	0.65794	80.847	14.7128	11.1472	3.36758	2398.73	436.529	330.739	99.9163	77.4794	0.958346
Story County, Iowa	19169	4	89542	30.3827	10.4137	2.90264	0.214779	22.3275	4.53334	1.85545	0.214779	82.2383	33.163	28.5357	8.91728	59.9108	28.6297	26.6803	8.7025	90.2935	39.0434	29.5829	8.91728	1008.39	436.034	330.38	99.5877	81.3763	0.901241
Tama County, Iowa	19171	6	17767	8.56962	4.94655	2.50635	0.180132	6.96686	3.77653	2.298	0.180132	16.3178	6.58024	5.66209	1.76937	9.35093	2.80371	3.36409	1.58924	17.9206	7.75025	5.87044	1.76937	1008.64	436.216	330.413	99.5877	16.1512	0.901266
Taylor County, Iowa	19173	6	6317	1.95751	1.67354	1.28364	0.119	1.39103	1.26	1.21	0.119	14.5831	2.34166	2.01521	0.631171	13.1921	1.08166	0.805212	0.512171	15.1496	2.75519	2.08886	0.631171	2398.22	436.156	330.672	99.9163	14.5184	0.958337
Union County, Iowa	19175	6	12534	9.77266	5.178	2.50289	0.175512	7.39618	3.28151	2.18151	0.175512	11.5116	4.64213	3.9944	1.24823	4.11546	1.36062	1.81289	1.07272	13.8881	6.53862	4.31578	1.24823	1108.04	521.67	344.326	99.5877	12.6399	0.910122
Van Buren County, Iowa	19177	6	7570	1.91771	1.67702	0.983971	0.084	1.22686	1.1727	0.89416	0.084	6.95254	2.80365	2.41245	0.753879	5.72568	1.63095	1.51829	0.669879	7.64339	3.30797	2.50226	0.753879	1009.69	436.984	330.55	99.5877	6.88951	0.901369
Wapello County, Iowa	19179	5	35625	122.657	5.8995	1.91678	0.204966	119.3	3.42878	1.47878	0.204966	32.7192	13.1942	11.3532	3.54781	-86.5807	9.7654	9.87439	3.34284	36.0766	15.6649	11.7912	3.54781	1012.68	439.716	330.98	99.5877	32.5288	0.901659
Warren County, Iowa	19181	3	46225	4.92497	3.78269	1.28739	0.100809	0.766131	0.746741	0.746741	0.100809	42.4546	17.12	14.7312	4.60344	41.6884	16.3733	13.9845	4.50263	46.6134	20.156	15.2719	4.60344	1008.4	436.041	330.382	99.5877	42.01	0.901242
Washington County, Iowa	19183	4	21704	8.02373	6.45696	4.57483	0.455346	6.07555	5.03479	4.32157	0.455346	19.9337	8.03836	6.91675	2.16145	13.8581	3.00357	2.59518	1.7061	21.8818	9.46053	7.17001	2.16145	1008.19	435.889	330.355	99.5877	19.7204	0.901222
Wayne County, Iowa	19185	6	6403	1.3303	1.10862	0.735439	0.065	0.75	0.685	0.66	0.065	5.88073	2.37143	2.04054	0.63766	5.13073	1.68643	1.38054	0.57266	6.46103	2.79506	2.11598	0.63766	1009.06	436.523	330.467	99.5877	5.82337	0.901307
Webster County, Iowa	19187	5	38013	23.4555	14.2386	3.8749	0.128113	20.029	11.7335	3.41743	0.123001	87.7548	14.0911	12.1267	3.79812	67.7258	2.3576	8.70926	3.67512	91.1814	16.5962	12.5842	3.80323	2398.69	436.593	331.049	100.051	87.3781	0.958289
Winnebago County, Iowa	19189	6	10866	4.14077	3.0064	2.0928	0.198458	3.15978	2.29028	1.96528	0.198458	25.0847	4.02794	3.46641	1.08569	21.9249	1.73766	1.50113	0.887233	26.0657	4.74406	3.59394	1.08569	2398.83	436.596	330.751	99.9163	24.98	0.958348
Winneshiek County, Iowa	19191	6	21056	9.52396	7.90014	6.29961	0.632346	7.63107	6.51833	6.05354	0.632346	25.3889	7.80639	6.71827	2.10494	17.7578	1.28806	0.664728	1.47259	27.2818	9.1882	6.96434	2.10494	1295.68	436.37	330.753	99.9687	25.1768	0.922844
Woodbury County, Iowa	19193	4	102172	731.332	23.4925	9.19661	1.45722	722.144	16.7852	8.00215	1.45722	235.869	37.8743	32.5943	10.2087	-486.275	21.0891	24.5922	8.75143	245.057	44.5816	33.7888	10.2087	2398.48	436.339	330.705	99.9163	234.848	0.958342
Worth County, Iowa	19195	5	7598	19.811	12.0383	3.19169	0.303751	19.1202	11.534	3.10188	0.303751	17.5403	2.81651	2.42387	0.759164	-1.57986	-8.71752	-0.678012	0.455414	18.2312	3.32083	2.51368	0.759164	2399.47	437.066	330.834	99.9163	17.472	0.958359
Wright County, Iowa	19197	6	13229	8.86969	6.46306	4.92027	0.444	7.68145	5.59565	4.7658	0.444	30.5398	4.90388	4.22024	1.32179	22.8583	-0.691766	-0.545564	0.877793	31.728	5.7713	4.37471	1.32179	2398.37	436.261	330.691	99.9163	30.4062	0.95834
Allen County, Kansas	20001	6	13371	5.31954	3.33954	1.30052	0.106918	4.17278	2.50241	1.15144	0.106918	33.9805	29.1081	28.0901	10.0142	29.8078	26.6057	26.9387	9.90725	35.1273	29.9452	28.2392	10.0142	2627.13	2239.57	2111.98	748.947	25.1131	0.714918
Anderson County, Kansas	20003	6	8102	2.74273	2.43466	1.96187	0.401508	2.12097	1.98078	1.88104	0.401508	20.5901	17.6377	17.0209	6.06797	18.4691	15.6569	15.1399	5.66646	21.2119	18.0916	17.1017	6.06797	2618.1	2232.98	2110.8	748.947	15.1439	0.713935
Atchison County, Kansas	20005	5	16924	7.63038	3.84886	1.61706	0.115785	6.19343	2.79989	1.43026	0.115785	16.0249	10.1095	9.19083	3.24957	9.83143	7.30956	7.76057	3.13379	17.4618	11.1584	9.37763	3.24957	1031.78	659.325	554.102	192.01	14.2122	0.813904
Barber County, Kansas	20007	6	4861	10.3186	7.82222	7.05723	2.18457	9.51726	7.23722	6.95305	2.18457	12.3536	10.5822	10.2121	3.64063	2.8363	3.34499	3.25907	1.45606	13.1549	11.1672	10.3163	3.64063	2706.22	2297.31	2122.26	748.947	9.5143	0.72325
Barton County, Kansas	20009	5	27674	52.9325	48.8926	46.639	16.3613	50.3902	47.0367	46.3085	16.3613	70.3296	60.2452	58.1383	20.7263	19.9394	13.2084	11.8298	4.36507	72.8719	62.101	58.4688	20.7263	2633.23	2244.02	2112.77	748.947	52.1456	0.715578
Bourbon County, Kansas	20011	6	15173	4.25114	2.81191	1.61594	0.128	3.04402	1.93006	1.45896	0.128	38.5601	33.031	31.8758	11.3638	35.5161	31.101	30.4169	11.2358	39.7672	33.9129	32.0328	11.3638	2620.92	2235.08	2111.17	748.947	28.4034	0.714243
Brown County, Kansas	20013	6	9984	3.58015	2.79155	1.99466	0.476976	2.58534	2.06534	1.86534	0.476976	25.373	21.7348	20.9747	7.47748	22.7876	19.6694	19.1093	7.00051	26.3678	22.461	21.104	7.47748	2641	2249.7	2113.78	748.947	18.8903	0.716416
Butler County, Kansas	20015	3	65880	23.4292	13.6402	6.51293	0.81011	17.2807	9.15187	5.71363	0.81011	167.425	143.418	138.402	49.3406	150.144	134.266	132.689	48.5305	173.573	147.906	139.202	49.3406	2634.69	2245.09	2112.96	748.947	124.233	0.715736
Chase County, Kansas	20017	6	2790	2.04847	1.84157	1.33741	0.123	1.73067	1.60958	1.29609	0.123	7.0904	6.07372	5.86131	2.08956	5.35973	4.46414	4.56521	1.96656	7.4082	6.30571	5.90262	2.08956	2655.27	2260.11	2115.63	748.947	5.31864	0.717939
Chautauqua County, Kansas	20019	6	3669	1.3916	1.17207	0.923108	0.086	1.06	0.93	0.88	0.086	9.32425	7.98726	7.70793	2.74788	8.26425	7.05726	6.82793	2.66188	9.65586	8.22933	7.75104	2.74788	2631.74	2242.94	2112.58	748.946	6.90797	0.715418
Cherokee County, Kansas	20021	6	21603	9.34905	2.99999	1.56055	0.196271	7.60814	1.72913	1.33423	0.196271	54.901	47.0289	45.3842	16.1795	47.2929	45.2997	44.0499	15.9832	56.6419	48.2997	45.6105	16.1795	2621.95	2235.79	2111.3	748.947	40.4624	0.714355
Cheyenne County, Kansas	20023	6	2726	59.4735	58.9541	58.3981	21.2437	58.7551	58.4297	58.3047	21.2437	7.83395	5.93811	5.73057	2.04535	-50.9211	-52.4915	-52.5741	-19.1984	8.55242	6.46259	5.82397	2.04535	3137.35	2370.72	2136.45	750.311	6.50708	0.760846
Clark County, Kansas	20025	6	2215	7.29914	6.9701	6.61158	2.06964	6.84318	6.63726	6.55231	2.06964	5.62911	4.82196	4.65333	1.65892	-1.21407	-1.81529	-1.89898	-0.410727	6.08507	5.15481	4.7126	1.65892	2747.21	2327.23	2127.59	748.946	4.42615	0.727379
Clay County, Kansas	20027	6	8535	12.6613	11.8726	11.1006	3.76446	11.7079	11.1766	10.9766	3.76446	21.6905	18.5804	17.9306	6.39226	9.98262	7.40373	6.95393	2.6278	22.6439	19.2763	18.0545	6.39226	2653.06	2258.5	2115.35	748.947	16.2516	0.717705
Cloud County, Kansas	20029	6	9533	14.9157	14.2184	13.2726	4.63208	13.9209	13.4922	13.1432	4.63208	24.2268	20.753	20.0272	7.13971	10.3059	7.26076	6.88395	2.50763	25.2216	21.4792	20.1565	7.13971	2645.71	2253.14	2114.39	748.947	18.0819	0.716921
Coffey County, Kansas	20031	6	8601	124.588	2.0293	1.54834	0.312863	123.911	1.53507	1.46033	0.312863	21.8582	18.724	18.0692	6.44169	-102.053	17.189	16.6089	6.12883	22.5353	19.2183	18.1572	6.44169	2620.08	2234.42	2111.06	748.947	16.0936	0.714151
Comanche County, Kansas	20033	6	1891	11.4802	11.1882	10.8977	3.79046	1.09	0.895	0.82	0.079	4.80572	4.11663	3.97266	1.41626	3.71572	3.22163	3.15266	1.33726	15.1959	14.4098	14.0503	5.12771	8035.91	7620.22	7430.1	2711.64	10.0682	0.66256
Cowley County, Kansas	20035	5	36311	11.8528	7.67282	4.25453	0.871412	8.49529	5.22186	3.81806	0.871412	92.2794	79.0476	76.2831	27.195	83.7841	73.8257	72.465	26.3236	95.6369	81.4985	76.7196	27.195	2633.83	2244.46	2112.85	748.947	68.4419	0.715643
Crawford County, Kansas	20037	5	39134	9.9831	7.18186	3.90379	0.494612	6.47363	4.61994	3.44755	0.494612	99.4536	85.1931	82.2137	29.3093	92.98	80.5732	78.7662	28.8147	102.963	87.7551	82.67	29.3093	2631.04	2242.42	2112.48	748.947	73.6538	0.715342
Decatur County, Kansas	20039	6	2961	13.1094	12.7726	12.3826	4.1942	12.5843	12.3893	12.3143	4.1942	8.5093	6.45002	6.22459	2.22167	-4.07503	-5.9393	-6.08973	-1.97253	9.03433	6.83329	6.29284	2.22167	3051.11	2307.77	2125.24	750.311	6.81266	0.754086
Dickinson County, Kansas	20041	6	19754	8.37783	6.6716	5.0925	1.25782	6.59548	5.37048	4.86079	1.25782	50.2021	43.0037	41.4997	14.7947	43.6066	37.6332	36.6389	13.5369	51.9844	44.3048	41.7314	14.7947	2631.59	2242.83	2112.56	748.947	37.1897	0.715401
Doniphan County, Kansas	20043	4	7945	1.10702	0.864752	0.440171	0.0381122	0.443817	0.378817	0.353817	0.0381122	20.1911	17.2959	16.6911	5.95038	19.7473	16.9171	16.3372	5.91227	20.8543	17.7819	16.7774	5.95038	2624.84	2238.12	2111.7	748.947	14.9039	0.714669
Douglas County, Kansas	20045	4	110826	66.7726	12.18	3.99356	0.529154	57.2943	5.26087	2.76139	0.529154	281.649	241.264	232.826	83.0028	224.355	236.003	230.065	82.4736	291.127	248.183	234.058	83.0028	2626.89	2239.39	2111.94	748.947	208.124	0.714892
Edwards County, Kansas	20047	6	3037	137.281	137.043	136.741	50.14	136.894	136.76	136.69	50.14	7.71812	6.61143	6.38021	2.27455	-129.176	-130.149	-130.31	-47.8654	8.10499	6.89384	6.43051	2.27455	2668.75	2269.95	2117.39	748.947	5.83043	0.719364
Elk County, Kansas	20049	6	2882	1.22687	1.13319	0.891122	0.084	0.922898	0.911292	0.851606	0.084	7.3242	6.274	6.05458	2.15846	6.4013	5.3627	5.20297	2.07446	7.62817	6.4959	6.0941	2.15846	2646.83	2253.95	2114.54	748.946	5.46971	0.717041
Ellis County, Kansas	20051	5	28452	8.25877	5.76984	3.72928	0.826607	6.00665	4.12578	3.43651	0.826607	72.3068	61.9389	59.7727	21.309	66.3002	57.8131	56.3362	20.4824	74.5589	63.5829	60.0655	21.309	2620.52	2234.74	2111.12	748.947	53.2499	0.714199
Ellsworth County, Kansas	20053	6	6497	3.68366	2.3477	1.0358	0.106122	2.90994	1.78289	0.935216	0.106122	16.5112	14.1437	13.6491	4.86591	13.6013	12.3608	12.7139	4.75978	17.2849	14.7085	13.7497	4.86591	2660.45	2263.89	2116.31	748.947	12.419	0.718489
Finney County, Kansas	20055	5	36776	388.52	375.792	369.833	134.763	383.27	371.959	369.15	134.763	105.687	80.11	77.3102	27.5934	-277.583	-291.849	-291.84	-107.17	110.937	83.9428	77.9927	27.5934	3016.56	2282.54	2120.75	750.311	83.3435	0.751269
Ford County, Kansas	20057	5	33848	145.584	123.382	117.127	41.5925	140.872	119.943	116.514	41.5925	86.02	73.6857	71.1088	25.3503	-54.8522	-46.2571	-45.4053	-16.2422	90.7315	77.1251	71.7213	25.3503	2680.56	2278.57	2118.92	748.947	65.3812	0.7206
Franklin County, Kansas	20059	5	25992	5.1954	3.96029	2.43528	0.470994	3.2196	2.51796	2.17843	0.470994	24.6149	15.5286	14.1175	4.99148	21.3953	13.0106	11.9391	4.52049	26.5907	16.9709	14.3744	4.99148	1023.03	652.927	553.03	192.039	21.5992	0.812285
Geary County, Kansas	20061	5	34362	20.4875	15.3568	11.6345	1.79944	17.2406	12.9866	11.2124	1.79944	87.3263	74.8047	72.1886	25.7353	70.0857	61.8181	60.9762	23.9359	90.5732	77.175	72.6107	25.7353	2635.85	2245.94	2113.11	748.947	64.8379	0.715862
Gove County, Kansas	20063	6	2695	24.9196	24.5621	24.1091	8.42831	24.3393	24.1385	24.0337	8.42831	7.74487	5.87058	5.6654	2.02209	-16.5945	-18.2679	-18.3683	-6.40623	8.32517	6.2942	5.74084	2.02209	3089.12	2335.51	2130.18	750.311	6.30308	0.757111
Graham County, Kansas	20065	6	2597	19.8066	19.3546	18.9477	6.79677	19.3368	19.0117	18.8867	6.79677	7.46323	5.65711	5.45939	1.94856	-11.8736	-13.3546	-13.4273	-4.84821	7.933	6.00004	5.52046	1.94856	3054.68	2310.37	2125.71	750.311	5.98445	0.754373
Grant County, Kansas	20067	6	7829	178.815	177.292	175.778	63.5127	177.074	176.021	175.551	63.5127	22.4989	17.0541	16.458	5.87418	-154.575	-158.967	-159.093	-57.6386	24.2398	18.325	16.6844	5.87418	3096.16	2340.65	2131.1	750.311	18.3656	0.757664
Gray County, Kansas	20069	6	6006	263.129	261.975	260.835	94.7584	261.761	260.977	260.657	94.7584	15.2634	13.0748	12.6176	4.49817	-246.497	-247.902	-248.039	-90.2602	16.6313	14.0734	12.7954	4.49817	2769.11	2343.22	2130.43	748.947	12.1331	0.729535
Greeley County, Kansas	20071	6	1247	24.571	24.3515	24.1025	8.72718	24.2394	24.1094	24.0594	8.72718	3.58362	2.71637	2.62143	0.935638	-20.6558	-21.393	-21.438	-7.79154	3.91522	2.95844	2.66454	0.935638	3139.71	2372.45	2136.76	750.311	2.97958	0.761025
Greenwood County, Kansas	20073	6	6689	2.49939	2.07524	1.61048	0.160337	1.89145	1.63145	1.53145	0.160337	16.9992	14.5617	14.0524	5.0097	15.1077	12.9302	12.521	4.84937	17.6071	15.0055	14.1315	5.0097	2632.25	2243.31	2112.64	748.947	12.5974	0.715473
Hamilton County, Kansas	20075	6	2690	60.3241	59.7468	59.0216	21.0079	59.4398	59.1013	58.9067	21.0079	7.7305	5.85969	5.65489	2.01834	-51.7093	-53.2416	-53.2518	-18.9895	8.61477	6.50521	5.76985	2.01834	3202.52	2418.29	2144.92	750.311	6.59643	0.765712
Harper County, Kansas	20077	6	6034	5.21141	4.56168	3.85127	0.945414	4.41004	3.97668	3.74709	0.945414	15.3346	13.1358	12.6764	4.51914	10.9245	9.1591	8.92929	3.57373	16.1359	13.7208	12.7806	4.51914	2674.17	2273.91	2118.09	748.946	11.6168	0.719933
Harvey County, Kansas	20079	3	34684	61.5123	49.0694	42.6795	14.6911	58.2792	46.7092	42.2592	14.6911	88.1446	75.5057	72.8651	25.9765	29.8654	28.7965	30.6059	11.2854	91.3777	77.8658	73.2854	25.9765	2634.58	2245.01	2112.94	748.947	65.4012	0.715724
Haskell County, Kansas	20081	6	4256	274.73	274.001	273.187	99.0397	273.749	273.284	273.06	99.0397	10.816	9.26514	8.94112	3.18752	-262.933	-264.019	-264.119	-95.8522	11.797	9.98126	9.06864	3.18752	2771.86	2345.22	2130.79	748.947	8.6095	0.729803
Hodgeman County, Kansas	20083	6	1916	32.1577	31.9247	31.6293	11.0793	31.7985	31.6624	31.5826	11.0793	4.86925	4.17106	4.02518	1.43498	-26.9292	-27.4914	-27.5574	-9.64433	5.22848	4.4333	4.07188	1.43498	2728.85	2313.83	2125.2	748.947	3.7935	0.725545
Jackson County, Kansas	20085	4	13462	3.27476	2.39553	1.49088	0.163157	2.10034	1.5382	1.3382	0.163157	34.2118	29.3062	28.2813	10.0823	32.1115	27.768	26.9431	9.91916	35.3862	30.1636	28.434	10.0823	2628.6	2240.64	2112.17	748.947	25.3039	0.715078
Jefferson County, Kansas	20087	4	19126	5.18304	4.58402	3.17459	0.768474	3.45592	3.32323	2.95006	0.768474	48.601	41.6322	40.1762	14.3229	45.1451	38.309	37.2261	13.5544	50.3281	42.893	40.4007	14.3229	2631.4	2242.65	2112.35	748.868	36.0053	0.71541
Jewell County, Kansas	20089	6	3077	76.4293	76.0761	75.7688	27.7654	76.0839	75.8239	75.7239	27.7654	7.81977	6.69851	6.46424	2.30451	-68.2641	-69.1254	-69.2597	-25.4609	8.16519	6.95066	6.50915	2.30451	2653.62	2258.91	2115.42	748.947	5.86068	0.717764
Johnson County, Kansas	20091	2	544179	64.2365	47.1299	11.3666	1.24859	5.95749	4.58616	3.79032	1.24859	515.268	325.062	295.524	104.488	509.311	320.476	291.734	103.239	573.547	367.606	303.101	104.488	1053.97	675.524	556.987	192.01	469.059	0.817822
Kearny County, Kansas	20093	5	3977	242.892	242.371	241.758	88.8888	242.229	241.886	241.672	88.8888	11.4291	8.66319	8.36041	2.98399	-230.8	-233.223	-233.311	-85.9048	12.0923	9.14733	8.44663	2.98399	3040.55	2300.06	2123.87	750.311	9.10828	0.753232
Kingman County, Kansas	20095	3	7858	31.2083	29.9715	29.0281	8.72603	30.2273	29.2554	28.9006	8.72603	19.97	17.1065	16.5083	5.88522	-10.2573	-12.1489	-12.3923	-2.84081	20.951	17.8227	16.6358	5.88522	2666.2	2268.09	2117.06	748.947	15.0658	0.719096
Kiowa County, Kansas	20097	6	2553	80.969	80.5671	80.1405	29.4573	80.4578	80.1939	80.074	29.4573	6.4881	5.55778	5.36341	1.91206	-73.9697	-74.6361	-74.7106	-27.5452	6.99932	5.93097	5.42987	1.91206	2741.6	2323.14	2126.86	748.947	5.08726	0.726822
Labette County, Kansas	20099	5	21607	6.2674	4.25938	2.5387	0.314254	4.3745	2.87757	2.29262	0.314254	54.9112	47.0376	45.3926	16.1825	50.5367	44.16	43.0999	15.8682	56.8041	48.4194	45.6386	16.1825	2628.97	2240.91	2112.21	748.947	40.6216	0.715118
Lane County, Kansas	20101	6	1750	21.3799	21.1398	20.8395	7.34031	20.9793	20.8473	20.7874	7.34031	5.02913	3.81207	3.67883	1.31304	-15.9501	-17.0353	-17.1085	-6.02727	5.42982	4.10457	3.73092	1.31304	3102.75	2345.47	2131.96	750.311	4.11678	0.758179
Leavenworth County, Kansas	20103	2	76227	37.2822	16.2686	5.04677	0.285825	30.9541	11.6491	4.22412	0.285825	72.1772	45.5338	41.3962	14.6363	41.2231	33.8846	37.1721	14.3505	78.5053	50.1532	42.2188	14.6363	1029.89	657.946	553.857	192.01	63.869	0.813563
Lincoln County, Kansas	20105	6	3241	2.15455	1.98558	1.51636	0.268828	1.75388	1.69309	1.46427	0.268828	8.23655	7.05552	6.80878	2.42734	6.48267	5.36244	5.3445	2.15851	8.63722	7.34801	6.86086	2.42734	2664.99	2267.21	2116.9	748.946	6.20989	0.718968
Linn County, Kansas	20107	2	9656	129.203	1.96027	1.238	0.239192	128.415	1.38535	1.13561	0.239192	9.143	5.76796	5.24383	1.85405	-119.272	4.3826	4.10822	1.61485	9.93055	6.34287	5.34621	1.85405	1028.43	656.884	553.668	192.01	8.07651	0.813299
Logan County, Kansas	20109	6	2756	9.44478	8.80644	8.1788	2.82692	8.82303	8.35256	8.09797	2.82692	7.92017	6.00346	5.79364	2.06786	-0.902864	-2.3491	-2.30433	-0.759067	8.54192	6.45734	5.87447	2.06786	3099.39	2343.01	2131.52	750.311	6.47406	0.757917
Lyon County, Kansas	20111	5	33690	18.9599	5.93681	2.60802	0.193623	16.0445	3.80861	2.22903	0.193623	85.6185	73.3418	70.7768	25.232	69.5739	69.5332	68.5478	25.0384	88.5338	75.47	71.1558	25.232	2627.9	2240.13	2112.08	748.947	63.3018	0.715001
McPherson County, Kansas	20113	5	29180	44.1106	37.836	33.6177	11.5946	40.5044	35.2035	33.1489	11.5946	74.1569	63.5237	61.3021	21.8543	33.6525	28.3202	28.1532	10.2597	77.7631	66.1562	61.7709	21.8543	2664.94	2267.18	2116.89	748.947	55.9088	0.718964
Marion County, Kansas	20115	6	12660	5.11243	4.47158	3.59385	0.771015	4.0071	3.66469	3.45015	0.771015	32.1736	27.5603	26.5965	9.48166	28.1665	23.8956	23.1463	8.71065	33.279	28.3672	26.7402	9.48166	2628.67	2240.7	2112.18	748.947	23.7973	0.715085
Marshall County, Kansas	20117	6	10117	4.90572	4.0747	3.07057	0.673781	3.89708	3.33839	2.93944	0.673781	25.711	22.0243	21.2541	7.57709	21.8139	18.6859	18.3146	6.90331	26.7196	22.7606	21.3852	7.57709	2641.06	2249.74	2113.79	748.947	19.1425	0.716422
Meade County, Kansas	20119	6	4575	212.08	211.39	210.716	77.0862	211.265	210.795	210.61	77.0862	11.6267	9.95959	9.61128	3.42643	-199.638	-200.835	-200.998	-73.6598	12.4419	10.5547	9.71726	3.42643	2719.55	2307.03	2123.99	748.947	9.01549	0.724606
Miami County, Kansas	20121	2	32787	7.04016	4.32317	1.80791	0.159521	4.0972	2.1748	1.42532	0.159521	31.0413	19.5827	17.8033	6.29465	26.9441	17.4079	16.378	6.13513	33.9843	21.7311	18.1859	6.29465	1036.52	662.796	554.667	191.986	27.6896	0.814778
Mitchell County, Kansas	20123	6	6373	18.0679	17.1029	16.4632	5.69748	17.46	16.6591	16.3841	5.69748	16.1961	13.8738	13.3886	4.77304	-1.26386	-2.78539	-2.99558	-0.924443	16.804	14.3176	13.4676	4.77304	2636.75	2246.6	2113.23	748.946	12.031	0.715959
Montgomery County, Kansas	20125	5	35471	17.2095	7.71378	2.88181	0.19678	14.1146	5.45446	2.47946	0.19678	90.1446	77.2189	74.5184	26.5659	76.03	71.7645	72.0389	26.3691	93.2396	79.4783	74.9208	26.5659	2628.61	2240.65	2112.17	748.947	66.6737	0.715079
Morris County, Kansas	20127	6	5923	2.55465	2.07297	1.59979	0.18101	1.97435	1.64935	1.52435	0.18101	15.0525	12.8941	12.4432	4.43601	13.0781	11.2448	10.9188	4.255	15.6328	13.3178	12.5186	4.43601	2639.34	2248.48	2113.56	748.946	11.1968	0.716237
Morton County, Kansas	20129	6	3233	66.0176	65.3129	64.1979	23.185	65.1886	64.7077	64.0901	23.185	9.29097	7.04252	6.79638	2.42576	-55.8976	-57.6651	-57.2937	-20.7593	10.12	7.64772	6.90416	2.42576	3130.22	2365.52	2135.53	750.311	7.69424	0.760301
Nemaha County, Kansas	20131	6	10178	4.79661	3.80455	2.83	0.309588	3.62219	2.94722	2.67732	0.309588	25.866	22.1571	21.3822	7.62278	22.2438	19.2099	18.7049	7.31319	27.0404	23.0144	21.5349	7.62278	2656.75	2261.19	2115.83	748.947	19.4176	0.718097
Neosho County, Kansas	20133	6	16512	4.05734	3.18356	1.66111	0.151694	2.52368	2.06398	1.46174	0.151694	41.963	35.946	34.6888	12.3666	39.4393	33.882	33.2271	12.2149	43.4966	37.0655	34.8882	12.3666	2634.24	2244.76	2112.9	748.947	31.13	0.715688
Ness County, Kansas	20135	6	3107	5.65296	5.39018	5.01687	1.63433	5.19701	5.05734	4.9576	1.63433	7.89601	6.76381	6.52727	2.32698	2.699	1.70647	1.56967	0.692644	8.35196	7.09666	6.58654	2.32698	2688.11	2284.09	2119.9	748.946	6.02498	0.721386
Norton County, Kansas	20137	6	5671	19.2293	18.6302	17.9927	6.14005	18.4832	18.0855	17.8957	6.14005	16.2973	12.3533	11.9215	4.25501	-2.18596	-5.73222	-5.97418	-1.88503	17.0434	12.8979	12.0185	4.25501	3005.36	2274.37	2119.29	750.311	12.7884	0.750342
Osage County, Kansas	20139	4	16295	3.19195	2.3395	1.18793	0.120903	1.87936	1.38131	1.01729	0.120903	41.4115	35.4736	34.233	12.2041	39.5321	34.0922	33.2157	12.0832	42.7241	36.4317	34.4036	12.2041	2621.91	2235.76	2111.3	748.947	30.52	0.714351
Osborne County, Kansas	20141	6	3858	2.80577	2.48379	2.14351	0.612236	2.36363	2.16103	2.08603	0.612236	9.80457	8.39871	8.10499	2.88944	7.44094	6.23768	6.01896	2.2772	10.2467	8.72147	8.16247	2.88944	2655.96	2260.62	2115.73	748.947	7.35727	0.718013
Ottawa County, Kansas	20143	5	6091	4.02916	3.67251	3.25761	0.886174	3.46268	3.25897	3.18397	0.886174	15.4794	13.2599	12.7961	4.56183	12.0168	10.0009	9.61216	3.67566	16.0459	13.6734	12.8698	4.56183	2634.37	2244.85	2112.92	748.947	11.4841	0.715701
Pawnee County, Kansas	20145	6	6973	99.2916	98.1974	97.1961	35.2466	98.1725	97.3804	97.0506	35.2466	17.7209	15.1799	14.6491	5.2224	-80.4516	-82.2005	-82.4015	-30.0242	18.8401	15.9969	14.7946	5.2224	2701.86	2294.12	2121.69	748.947	13.6177	0.722803
Phillips County, Kansas	20147	6	5642	25.4886	24.3681	23.6698	8.33619	24.9497	23.9747	23.5997	8.33619	14.3384	12.2824	11.8529	4.22556	-10.6113	-11.6923	-11.7468	-4.11064	14.8772	12.6758	11.9229	4.22556	2636.87	2246.68	2113.24	748.946	10.6517	0.715971
Pottawatomie County, Kansas	20149	4	21604	195.745	10.7418	7.57224	2.06818	193.562	9.14814	7.28845	2.06818	54.9036	47.031	45.3863	16.1802	-138.658	37.8829	38.0978	14.1121	57.0866	48.6247	45.67	16.1802	2642.41	2250.72	2113.96	748.947	40.9064	0.716567
Pratt County, Kansas	20151	6	9656	123.645	122.227	120.92	43.708	122.291	121.238	120.744	43.708	24.5394	21.0207	20.2856	7.23183	-97.7517	-100.218	-100.459	-36.4762	25.8934	22.0092	20.4616	7.23183	2681.59	2279.33	2119.06	748.947	18.6616	0.720708
Rawlins County, Kansas	20153	6	2519	19.7755	19.3867	18.9949	6.81721	19.3057	19.0438	18.9339	6.81721	7.23908	5.4872	5.29542	1.89003	-12.0667	-13.5566	-13.6384	-4.92718	7.70885	5.83013	5.35649	1.89003	3060.28	2314.46	2126.43	750.311	5.81881	0.754823
Reno County, Kansas	20155	5	64511	99.9919	83.2323	72.8143	25.1715	93.3183	78.3607	71.9468	25.1715	163.946	140.438	135.526	48.3153	70.6274	62.0772	63.5796	23.1438	170.619	145.31	136.394	48.3153	2644.81	2252.48	2114.27	748.947	122.304	0.716824
Republic County, Kansas	20157	6	4980	24.4234	24.0314	23.5021	8.3921	23.7326	23.5271	23.4123	8.3921	12.656	10.8413	10.4621	3.72975	-11.0766	-12.6859	-12.9502	-4.66235	13.3468	11.3456	10.5519	3.72975	2680.08	2278.23	2118.86	748.947	9.61706	0.720551
Rice County, Kansas	20159	6	10083	33.7018	31.0888	28.8645	10.0431	32.4307	30.1609	28.6992	10.0431	25.6245	21.9503	21.1826	7.55163	-6.80614	-8.21062	-7.51659	-2.49148	26.8957	22.8782	21.3479	7.55163	2667.43	2268.99	2117.21	748.947	19.344	0.719225
Riley County, Kansas	20161	4	71115	10.161	8.075	3.57656	0.774483	3.0454	2.88059	2.65153	0.774483	180.729	154.814	149.4	53.2613	177.684	151.934	146.749	52.4869	187.845	160.009	150.325	53.2613	2641.42	2250	2113.83	748.947	134.583	0.716461
Rooks County, Kansas	20163	6	5181	15.4593	14.8898	14.2872	4.87513	14.9204	14.4964	14.2171	4.87513	13.1668	11.2788	10.8844	3.88029	-1.75366	-3.2176	-3.33272	-0.994836	13.7056	11.6722	10.9544	3.88029	2645.37	2252.88	2114.35	748.947	9.82535	0.716884
Rush County, Kansas	20165	6	3307	12.4104	11.9119	11.5215	4.04329	12.0098	11.6194	11.4694	4.04329	8.40428	7.19921	6.94743	2.47677	-3.60548	-4.42023	-4.522	-1.56652	8.80497	7.49171	6.99952	2.47677	2662.52	2265.41	2116.58	748.947	6.3282	0.718708
Russell County, Kansas	20167	6	6970	2.20024	1.38034	0.82618	0.0920179	1.46796	0.845775	0.730983	0.0920179	17.7133	15.1734	14.6428	5.22016	16.2453	14.3276	13.9118	5.12814	18.4456	15.708	14.738	5.22016	2646.42	2253.66	2114.48	748.947	13.2254	0.716997
Saline County, Kansas	20169	5	55606	14.6416	10.2159	5.67709	1.45629	9.18396	6.23188	4.9676	1.45629	141.315	121.052	116.819	41.6459	132.131	114.82	111.851	40.1896	146.773	125.036	117.528	41.6459	2639.51	2248.61	2113.59	748.947	105.127	0.716255
Scott County, Kansas	20171	6	4936	60.679	59.9794	59.1413	20.058	59.5322	59.1422	58.9922	20.058	14.185	10.7522	10.3764	3.70353	-45.3472	-48.39	-48.6158	-16.3545	15.3318	11.5894	10.5255	3.70353	3106.12	2347.93	2132.39	750.311	11.6283	0.758441
Sedgwick County, Kansas	20173	3	498365	138.328	91.2969	53.9819	16.226	91.1441	56.8524	47.8479	16.226	1266.53	1084.92	1046.98	373.249	1175.38	1028.07	999.13	357.023	1313.71	1119.36	1053.11	373.249	2636.04	2246.07	2113.13	748.947	940.461	0.715882
Seward County, Kansas	20175	5	22952	220.354	211.536	207.698	75.3361	217.19	209.226	207.286	75.3361	58.3293	49.9656	48.2182	17.1898	-158.86	-159.26	-159.068	-58.1463	61.4934	52.2753	48.6295	17.1898	2679.22	2277.59	2118.75	748.947	44.3035	0.72046
Shawnee County, Kansas	20177	4	177934	64.6412	26.3795	11.1579	2.42963	49.5533	15.3654	9.19651	2.42963	452.195	387.355	373.808	133.263	402.641	371.99	364.612	130.833	467.282	398.369	375.77	133.263	2626.16	2238.86	2111.85	748.947	334.019	0.714813
Sheridan County, Kansas	20179	6	2556	100.176	99.6641	99.113	36.0145	99.4987	99.1699	99.025	36.0145	7.34541	5.5678	5.3732	1.9178	-92.1533	-93.6021	-93.6518	-34.0967	8.02243	6.06202	5.46121	1.9178	3138.67	2371.68	2136.62	750.311	6.10463	0.760946
Sherman County, Kansas	20181	6	6010	137.301	136.078	134.911	49.5939	135.947	135.09	134.735	49.5939	17.2715	13.0917	12.6342	4.50937	-118.676	-121.998	-122.101	-45.0846	18.6255	14.0802	12.8102	4.50937	3099.09	2342.79	2131.48	750.311	14.1161	0.757893
Smith County, Kansas	20183	6	3853	3.14053	2.73504	2.31173	0.59322	2.60168	2.34168	2.24168	0.59322	9.79187	8.38783	8.09448	2.88569	7.19019	6.04615	5.85281	2.29247	10.3307	8.78119	8.16454	2.88569	2681.21	2279.05	2119.01	748.947	7.44503	0.720669
Stafford County, Kansas	20185	6	4437	122.456	122.047	121.614	44.3968	121.918	121.654	121.544	44.3968	11.276	9.65917	9.32137	3.32308	-110.642	-111.995	-112.223	-41.0738	11.8149	10.0525	9.39142	3.32308	2662.81	2265.62	2116.61	748.946	8.4918	0.718738
Stanton County, Kansas	20187	6	2235	156.969	156.533	156.043	57.3066	156.319	156.059	155.959	57.3066	6.42292	4.86855	4.69839	1.67694	-149.897	-151.19	-151.261	-55.6297	7.0723	5.3426	4.78281	1.67694	3164.34	2390.43	2139.96	750.311	5.39536	0.762886
Stevens County, Kansas	20189	6	5724	273.473	272.385	271.173	99.7908	271.87	271.215	270.965	99.7908	16.4496	12.4687	12.0329	4.29478	-255.421	-258.746	-258.932	-95.496	18.0523	13.6387	12.2413	4.29478	3153.8	2382.73	2138.59	750.311	13.7575	0.762093
Sumner County, Kansas	20191	3	24132	13.0484	11.7104	10.1172	3.35984	10.9345	10.1672	9.84243	3.35984	61.3281	52.5344	50.6971	18.0736	50.3936	42.3672	40.8547	14.7137	63.4421	54.0776	50.972	18.0736	2628.96	2240.91	2112.21	748.947	45.3685	0.715117
Thomas County, Kansas	20193	6	7900	114.645	112.962	111.261	40.6421	112.517	111.409	110.984	40.6421	22.7029	17.2088	16.6073	5.92746	-89.8142	-94.2003	-94.3767	-34.7147	24.8307	18.762	16.8839	5.92746	3143.13	2374.94	2137.2	750.311	18.9033	0.761285
Trego County, Kansas	20195	6	3001	8.51776	8.06966	7.67108	2.67367	8.06181	7.73681	7.61181	2.67367	8.62425	6.53715	6.30867	2.25168	0.562436	-1.19966	-1.30314	-0.421987	9.0802	6.87	6.36795	2.25168	3025.72	2289.24	2121.94	750.311	6.82852	0.752023
Wabaunsee County, Kansas	20197	4	7053	5.21052	4.76731	4.22628	1.22246	4.57495	4.30335	4.14366	1.22246	17.9242	15.3541	14.8171	5.28232	13.3493	11.0507	10.6735	4.05986	18.5598	15.8181	14.8998	5.28232	2631.47	2242.74	2112.54	748.946	13.2775	0.715389
Wallace County, Kansas	20199	6	1485	62.7535	62.4341	62.0855	22.6848	62.2975	62.1013	62.0263	22.6848	4.26758	3.23481	3.12175	1.11421	-58.03	-58.8665	-58.9045	-21.5706	4.72353	3.56766	3.18103	1.11421	3180.83	2402.46	2142.11	750.311	3.60932	0.764115
Washington County, Kansas	20201	6	5799	8.03299	7.42604	6.87314	1.80303	7.36979	6.93651	6.78651	1.80303	14.7374	12.6242	12.1827	4.34314	7.36757	5.68768	5.39618	2.54011	15.4006	13.1137	12.2693	4.34314	2655.73	2261.38	2115.77	748.947	11.0574	0.717988
Wichita County, Kansas	20203	6	2234	75.1865	74.2056	73.7508	26.104	74.6615	73.8223	73.6826	26.104	6.42005	4.86638	4.69629	1.67619	-68.2414	-68.956	-68.9863	-24.4278	6.94509	5.24965	4.76455	1.6762	3108.81	2349.89	2132.74	750.311	5.26889	0.75865
Wilson County, Kansas	20205	6	9409	3.65313	2.40511	1.3669	0.200805	2.7136	1.71925	1.24476	0.200805	23.9117	20.483	19.7667	7.04684	21.1981	18.7638	18.5219	6.84603	24.8512	21.1689	19.8888	7.04684	2641.22	2249.85	2113.81	748.947	17.8044	0.716439
Woodson County, Kansas	20207	6	3309	1.73542	1.52708	1.30299	0.139449	1.44527	1.31527	1.26527	0.139449	8.40937	7.20356	6.95164	2.47826	6.9641	5.88829	5.68637	2.33882	8.69952	7.41537	6.98935	2.47826	2629.05	2240.97	2112.23	748.947	6.22125	0.715126
Wyandotte County, Kansas	20209	2	157505	136.028	41.9452	11.2816	0.162288	124.284	33.3719	9.75486	0.162288	149.137	94.0847	85.5354	30.2425	24.8531	60.7128	75.7805	30.0802	160.881	102.658	87.0621	30.2425	1021.44	651.776	552.758	192.01	130.639	0.81202
Adair County, Kentucky	21001	6	18656	4.83579	3.74814	2.33269	0.206224	3.03961	2.42946	2.07515	0.196	11.347	2.86441	1.518	0.30938	8.30743	0.434949	-0.557144	0.11338	13.1432	4.18309	1.77555	0.319604	704.504	224.222	95.1729	17.1314	12.8236	0.975683
Allen County, Kentucky	21003	4	19956	3.75831	3.17256	1.96208	0.244244	1.86542	1.79075	1.71601	0.244244	27.5212	3.06979	1.62876	0.335208	25.6558	1.27904	-0.0872453	0.0909639	29.4141	4.4516	1.87484	0.335208	1473.95	223.071	93.9486	16.7973	29.0789	0.988604
Anderson County, Kentucky	21005	5	21421	5.74305	3.09739	1.00082	0.0513366	3.69817	1.60463	0.734991	0.0513366	13.0288	3.28895	1.74298	0.355233	9.33062	1.68432	1.00799	0.303896	15.0737	4.78171	2.00882	0.355233	703.686	223.225	93.778	16.5834	14.7184	0.976434
Ballard County, Kentucky	21007	5	8249	43.9899	15.9109	4.75485	0.0483366	43.2715	15.3865	4.66145	0.0483366	11.3699	1.26823	0.672893	0.138485	-31.9016	-14.1182	-3.98856	0.0901484	12.0884	1.79271	0.766294	0.138485	1465.43	217.325	92.8954	16.7881	11.9499	0.988544
Barren County, Kentucky	21009	5	42173	14.7223	8.56407	4.13369	0.34902	10.522	5.43071	3.37128	0.257	25.6507	6.47518	3.43153	0.699372	15.1287	1.04447	0.0602542	0.442372	29.851	9.60854	4.19394	0.791391	707.821	227.836	99.4461	18.7654	29.0596	0.973489
Bath County, Kentucky	21011	5	11591	9.31061	9.01217	8.34896	0.835449	8.15	8.15	8.15	0.815	7.04993	1.77966	0.943136	0.192218	-1.10007	-6.37034	-7.20686	-0.622782	8.21054	2.64183	1.1421	0.212667	708.355	227.921	98.5331	18.3476	7.99787	0.974098
Bell County, Kentucky	21013	5	28691	6.16747	3.52758	0.768336	0.0163366	3.33979	1.44562	0.36417	0.001	17.4506	4.40517	2.33453	0.475794	14.1108	2.95955	1.97036	0.474794	20.2783	6.48714	2.73869	0.491131	706.781	226.104	95.4548	17.1179	19.7871	0.97578
Boone County, Kentucky	21015	2	118811	77.6977	9.39794	2.22417	0.160941	67.5977	2.02491	0.91116	0.160941	72.2638	18.2421	9.66741	1.97029	4.66609	16.2171	8.75625	1.80935	82.3638	25.6151	10.9804	1.97029	693.234	215.595	92.4192	16.5834	80.3935	0.976078
Bourbon County, Kentucky	21017	3	19985	4.88635	3.2474	1.66179	0.195152	3.1178	1.95636	1.43188	0.195152	12.1554	3.06847	1.62614	0.331419	9.03757	1.1121	0.194257	0.136267	13.9239	4.3595	1.85605	0.331419	696.718	218.139	92.8721	16.5834	13.5925	0.976198
Boyd County, Kentucky	21019	3	49542	61.1097	23.2882	6.31184	0.006	56.3982	19.8488	5.69934	0.006	22.6826	7.6177	4.04252	0.833221	-33.7155	-12.2311	-1.65682	0.827221	27.3941	11.0571	4.65502	0.833221	552.948	223.187	93.961	16.8185	26.5609	0.969584
Boyle County, Kentucky	21021	5	28432	9.5064	5.11781	2.00343	0.189468	6.79832	3.14091	1.65138	0.189468	17.2888	4.36433	2.31288	0.471383	10.4905	1.22342	0.661507	0.281915	19.9969	6.34123	2.66494	0.471383	703.323	223.032	93.7302	16.5793	19.5255	0.976427
Bracken County, Kentucky	21023	2	8488	2.44717	1.44707	0.657959	0.0842342	1.63198	0.851984	0.551984	0.0842342	5.16261	1.30323	0.690651	0.14076	3.53063	0.45125	0.138667	0.0565257	5.9778	1.89832	0.796626	0.14076	704.265	223.648	93.8532	16.5834	5.83704	0.976453
Breathitt County, Kentucky	21025	6	13878	14.6717	13.5474	12.3918	1.209	13.4861	12.6786	12.2375	1.209	6.3545	2.13409	1.13251	0.233426	-7.13157	-10.5445	-11.1049	-0.975574	7.5401	3.00283	1.28688	0.233426	543.313	216.373	92.7284	16.8198	7.30668	0.969042
Breckinridge County, Kentucky	21027	6	20059	4.01999	2.75309	1.36544	0.101	2.22382	1.44188	1.13193	0.101	26.7288	3.09289	1.64551	0.346257	24.5049	1.65101	0.513577	0.245257	28.5249	4.4041	1.87901	0.346257	1422.05	219.557	93.6744	17.2619	28.1787	0.987861
Bullitt County, Kentucky	21029	2	74319	13.2959	7.47723	2.10181	0.199039	7.16122	2.86465	0.871571	0.015	44.9731	10.2488	5.16581	1.14104	37.8119	7.38417	4.29424	1.12604	51.1078	14.8614	6.39606	1.32508	687.681	199.968	86.0622	17.8296	49.7827	0.974073
Butler County, Kentucky	21031	4	12690	2.33732	1.6189	0.72777	0.0582244	1.13527	0.741399	0.571502	0.0582244	17.4911	1.951	1.03516	0.213041	16.3558	1.2096	0.463655	0.154816	18.6931	2.8285	1.19142	0.213041	1473.06	222.892	93.8869	16.7881	18.4801	0.988603
Caldwell County, Kentucky	21033	6	12984	3.12625	2.73427	1.68807	0.467649	1.89659	1.83662	1.52821	0.467649	17.3047	2.0024	1.06534	0.224174	15.4081	0.16578	-0.462873	-0.243476	18.5344	2.90005	1.22519	0.224174	1427.48	223.356	94.3617	17.2654	18.3102	0.987905
Calloway County, Kentucky	21035	5	37191	9.67029	5.72135	2.52026	0.388844	6.40954	3.341	2.09636	0.388844	51.2617	5.71786	3.03377	0.624366	44.8522	2.37686	0.937407	0.235522	54.5225	8.09821	3.45767	0.624366	1466.01	217.747	92.9705	16.7881	53.8981	0.988548
Campbell County, Kentucky	21037	2	90336	41.548	18.0989	4.80917	0.122356	32.65	11.525	3.4	0.015	54.9446	13.8701	7.35046	1.49808	22.2946	2.34505	3.95046	1.48308	63.8426	20.4439	8.75963	1.60543	706.724	226.31	96.9672	17.7718	62.2371	0.974853
Carlisle County, Kentucky	21039	6	5104	1.1332	0.952558	0.670566	0.123907	0.704885	0.639885	0.614885	0.123907	7.03503	0.784705	0.416347	0.0856864	6.33015	0.14482	-0.198538	-0.0382209	7.46335	1.09738	0.472029	0.0856864	1462.26	215.004	92.4821	16.7881	7.37766	0.988519
Carroll County, Kentucky	21041	6	10811	260.647	10.1044	3.05769	0.165154	259.611	9.34797	2.92297	0.165154	6.57552	1.6599	0.879669	0.179283	-253.035	-7.68807	-2.0433	0.0141295	7.61177	2.41637	1.01438	0.179283	704.077	223.51	93.8287	16.5834	7.43249	0.976447
Carter County, Kentucky	21043	6	27720	7.13877	4.08741	1.30072	0.0581122	4.49975	2.16092	0.957648	0.0581122	12.6925	4.26264	2.26207	0.466246	8.19277	2.10172	1.30443	0.408133	15.3315	6.18913	2.60515	0.466246	553.086	223.273	93.9808	16.8198	14.8653	0.969589
Casey County, Kentucky	21045	6	15955	2.75183	2.21092	1.20259	0.123785	1.28724	1.14177	1.01219	0.123785	9.7024	2.44925	1.29798	0.264538	8.41516	1.30748	0.285791	0.140753	11.167	3.51839	1.48838	0.264538	699.905	220.52	93.286	16.5803	10.9024	0.976311
Christian County, Kentucky	21047	3	73955	24.9447	13.3853	5.35945	0.805371	18.1745	8.44309	4.47932	0.805371	101.921	11.3685	6.03189	1.2414	83.7466	2.92545	1.55257	0.436024	108.691	16.3108	6.91202	1.2414	1469.7	220.55	93.4625	16.7858	107.45	0.988579
Clark County, Kentucky	21049	3	35613	34.4377	6.06815	2.37617	0.279186	30.417	3.04685	1.84685	0.279187	21.6607	5.46797	2.89776	0.590585	-8.75634	2.42112	1.05091	0.311398	25.6814	8.48927	3.42708	0.590585	721.124	238.376	96.2311	16.5834	25.0908	0.977003
Clay County, Kentucky	21051	6	21730	6.5687	3.17095	0.830756	0.0161122	4.63435	1.75888	0.579291	0.0161122	13.2167	3.33639	1.76813	0.360357	8.58237	1.57751	1.18883	0.344245	15.1511	4.74846	2.01959	0.360357	697.242	218.521	92.9402	16.5834	14.7907	0.976216
Clinton County, Kentucky	21053	6	10272	5.62679	2.87065	1.22262	0.0731122	4.6458	2.15452	1.09509	0.0731122	14.1583	1.57925	0.837915	0.172447	9.51247	-0.575272	-0.25718	0.0993351	15.1393	2.29537	0.965443	0.172447	1473.84	223.459	93.9879	16.7881	14.9668	0.988609
Crittenden County, Kentucky	21055	6	9315	2.34336	1.67724	1.00483	0.120122	1.59725	1.13258	0.907839	0.120122	12.4148	1.43656	0.764295	0.160827	10.8175	0.303984	-0.143544	0.0407049	13.1609	1.98122	0.861289	0.160827	1412.87	212.691	92.4626	17.2654	13.0001	0.98778
Cumberland County, Kentucky	21057	6	6856	1.4232	0.922869	0.408237	0.0311122	0.773817	0.448817	0.323817	0.0311122	9.44988	1.05406	0.559262	0.115099	8.67606	0.605246	0.235445	0.083987	10.0993	1.52812	0.643683	0.115099	1473.05	222.887	93.886	16.7881	9.98416	0.988603
Daviess County, Kentucky	21059	4	96656	78.0255	16.9995	5.98072	0.802067	68.8056	10.2684	4.78209	0.802067	128.824	14.9068	7.93087	1.66885	60.0189	4.63839	3.14877	0.866786	138.044	21.6379	9.12949	1.66885	1428.2	223.865	94.4535	17.2659	136.376	0.987911
Edmonson County, Kentucky	21061	4	12161	3.04442	1.81913	0.762813	0.047	1.88382	0.971883	0.611934	0.047	7.39662	1.86718	0.989516	0.201671	5.5128	0.895299	0.377582	0.154671	8.55723	2.71442	1.14039	0.201671	703.661	223.207	93.7748	16.5834	8.35556	0.976433
Elliott County, Kentucky	21063	6	7852	1.11084	0.747964	0.299912	0.037561	0.489084	0.294084	0.219084	0.037561	4.77578	1.20558	0.638901	0.130213	4.2867	0.9115	0.419818	0.0926519	5.39753	1.65946	0.719729	0.130213	687.409	211.343	91.6619	16.5834	5.26732	0.975875
Estill County, Kentucky	21065	6	14672	2.30694	1.46756	0.427079	0.017	0.897632	0.438764	0.243869	0.017	8.92387	2.25272	1.19383	0.243312	8.02624	1.81395	0.949962	0.226312	10.3332	3.28151	1.37704	0.243312	704.279	223.658	93.855	16.5834	10.0899	0.976453
Fayette County, Kentucky	21067	3	295803	74.7336	38.8448	11.184	1.03968	47.1139	18.6824	7.59342	1.03968	179.915	45.4171	24.0689	4.90542	132.801	26.7347	16.4755	3.86573	207.534	65.5795	27.6595	4.90542	701.597	221.7	93.5063	16.5834	202.629	0.976363
Fleming County, Kentucky	21069	6	14348	3.30458	2.40365	1.32324	0.109112	1.93672	1.40511	1.14542	0.109112	8.73107	2.20404	1.16804	0.238055	6.79435	0.798934	0.0226146	0.128942	10.0989	3.20258	1.34586	0.238055	703.856	223.208	93.8012	16.5915	9.86087	0.976428
Floyd County, Kentucky	21071	6	39451	7.52411	4.31605	0.987453	0.0418976	3.65542	1.46206	0.388359	0.001	18.064	6.06657	3.21938	0.663559	14.4085	4.60451	2.83102	0.662559	21.9326	8.92056	3.81847	0.704457	555.946	226.117	96.7902	17.8565	21.2282	0.967881
Franklin County, Kentucky	21073	5	49285	14.2029	7.44742	2.38953	0.259049	9.50519	4.01811	1.77883	0.259049	29.9764	7.56714	4.01022	0.817313	20.4712	3.54904	2.23139	0.558264	34.6741	10.9965	4.62092	0.817313	703.542	223.12	93.7592	16.5834	33.8567	0.976429
Fulton County, Kentucky	21075	5	6813	1.8832	0.992869	0.328237	0.0171122	1.22	0.505	0.23	0.012	9.39061	1.04745	0.555755	0.114377	8.17061	0.542452	0.325755	0.102377	10.0538	1.53532	0.653992	0.119489	1475.68	225.352	95.9917	17.5385	9.93432	0.988115
Gallatin County, Kentucky	21077	2	8589	3.32679	1.70659	0.490205	0.0284488	2.53923	1.13168	0.387822	0.0284488	5.22404	1.31874	0.69887	0.142435	2.68481	0.187064	0.311047	0.113986	6.0116	1.89366	0.801252	0.142435	699.918	220.475	93.2882	16.5834	5.86916	0.976307
Garrard County, Kentucky	21079	6	16912	3.35946	2.33592	1.11943	0.0964488	1.70145	1.11065	0.855803	0.076	10.2863	2.59664	1.3761	0.280458	8.58485	1.486	0.520292	0.204458	11.9443	3.82191	1.63972	0.300907	706.262	225.988	96.9559	17.7925	11.6434	0.974807
Grant County, Kentucky	21081	2	24662	3.37701	2.3491	0.781497	0.0750098	1.01435	0.624351	0.474351	0.0750098	15	3.78657	2.0067	0.40898	13.9857	3.16222	1.53235	0.33397	17.3627	5.51131	2.31384	0.40898	704.027	223.474	93.8222	16.5834	16.9537	0.976445
Graves County, Kentucky	21083	5	37121	14.8084	9.0107	4.9836	0.798678	11.52	6.61017	4.55611	0.798678	51.1652	5.7071	3.02806	0.623191	39.6452	-0.903072	-1.52805	-0.175488	54.4536	8.10763	3.45555	0.623191	1466.92	218.411	93.0888	16.7881	53.8304	0.988556
Grayson County, Kentucky	21085	6	25746	4.79572	3.35348	1.57619	0.188244	2.07382	1.29188	0.981934	0.086	34.3136	3.97056	2.11246	0.444514	32.2398	2.67868	1.13052	0.358514	37.0355	6.03216	2.70672	0.546758	1438.49	234.295	105.132	21.2366	36.4887	0.985237
Green County, Kentucky	21087	6	11258	3.77114	3.20662	2.39036	0.245785	2.69343	2.41989	2.25026	0.245785	6.84739	1.72854	0.916041	0.186696	4.15397	-0.691354	-1.33422	-0.0590895	7.92511	2.51527	1.05614	0.186696	703.953	223.42	93.8127	16.5834	7.73841	0.976442
Greenup County, Kentucky	21089	3	36910	19.888	8.41669	2.38602	0.0846329	16.3785	5.85479	1.92979	0.0846329	22.452	5.66772	3.00362	0.61216	6.07347	-0.187073	1.07383	0.527527	25.9615	8.22962	3.45985	0.61216	703.372	222.965	93.7374	16.5852	25.3493	0.97642
Hancock County, Kentucky	21091	4	8565	93.7682	13.0531	3.86402	0.0922221	93.0167	12.5021	3.76614	0.0922221	11.4152	1.3209	0.702758	0.147878	-81.6015	-11.1812	-3.06338	0.0556558	12.1667	1.87197	0.800641	0.147878	1420.51	218.56	93.4782	17.2654	12.0188	0.987846
Hardin County, Kentucky	21093	4	105543	23.6793	12.9875	3.76696	0.224169	13.593	5.62461	2.45575	0.224169	63.8715	14.5555	7.33657	1.62052	50.2785	8.93093	4.88082	1.39636	73.9578	21.9185	8.64778	1.62052	700.736	207.673	81.9361	15.3542	72.3372	0.978089
Harlan County, Kentucky	21095	6	29278	7.86128	5.22744	1.21857	0.028	4.87874	3.01092	0.827824	0.028	17.8076	4.4953	2.38229	0.485529	12.9289	1.48438	1.55447	0.457529	20.7901	6.71183	2.77304	0.485529	710.094	229.245	94.7142	16.5834	20.3046	0.976646
Harrison County, Kentucky	21097	6	18846	5.46137	3.5464	1.91869	0.36662	3.66519	2.23519	1.68519	0.36662	11.4644	2.89405	1.53371	0.312581	7.79924	0.658858	-0.151483	-0.0540392	13.2606	4.20526	1.76721	0.312581	703.63	223.138	93.771	16.586	12.948	0.976428
Hart County, Kentucky	21099	6	18199	7.23961	4.01249	1.77867	0.125449	5.44344	2.68636	1.49708	0.105	11.0691	2.79425	1.48082	0.301801	5.62564	0.107887	-0.016266	0.196801	12.8653	4.12037	1.7624	0.32225	706.921	226.406	96.8405	17.707	12.543	0.974952
Henderson County, Kentucky	21101	3	46250	51.4871	9.4851	3.87646	0.785402	46.9636	6.16614	3.28712	0.785402	61.6407	7.1327	3.79481	0.798523	14.6771	0.966558	0.507689	0.0131213	66.1642	10.4517	4.38415	0.798523	1430.58	225.982	94.7925	17.2654	65.3656	0.987931
Henry County, Kentucky	21103	2	15416	3.3087	2.82712	1.82555	0.283703	1.25	1.185	1.16	0.115	9.32878	2.12591	1.07155	0.236686	8.07878	0.940914	-0.0884544	0.121686	11.3875	3.76803	1.7371	0.405389	738.679	244.424	112.682	26.2966	10.9821	0.9644
Hickman County, Kentucky	21105	6	4902	7.95548	7.71729	7.42688	2.47017	1.13	1	0.95	0.093	6.75661	0.753649	0.399869	0.0822952	5.62661	-0.246351	-0.550131	-0.0107048	13.5821	7.47094	6.87675	2.45947	2770.72	1524.06	1402.85	501.727	11.1226	0.818918
Hopkins County, Kentucky	21107	5	46920	17.8701	9.94636	2.72639	0.11001	12.884	6.22287	1.96617	0.064	62.5337	7.23602	3.84978	0.810091	49.6497	1.01315	1.88362	0.746091	67.5198	10.9595	4.61001	0.856101	1439.04	233.579	98.2526	18.246	66.6637	0.987321
Jackson County, Kentucky	21109	6	13494	3.02549	1.75501	0.564402	0.0281122	1.74053	0.816994	0.397357	0.0281122	8.20738	2.07185	1.09798	0.223776	6.46685	1.25485	0.700622	0.195664	9.49234	3.00987	1.26502	0.223776	703.449	223.052	93.7471	16.5834	9.26857	0.976426
Jefferson County, Kentucky	21111	1	741096	482.289	121.551	30.5744	0.73029	411.769	69.6311	19.9883	0.12705	448.464	102.199	51.5126	11.3783	36.6955	32.5683	31.5243	11.2512	518.985	154.12	62.0987	11.9815	700.294	207.962	83.7931	16.1673	507.003	0.976914
Jessamine County, Kentucky	21113	3	48586	10.7004	6.19629	2.20548	0.316171	5.62962	2.28947	0.885146	0.035	29.5512	7.45982	3.95334	0.805721	23.9216	5.17035	3.0682	0.770721	34.622	11.3666	5.27367	1.08689	712.591	233.949	108.543	22.3705	33.5351	0.968607
Johnson County, Kentucky	21115	6	23356	4.62686	2.49969	0.627992	0.0336732	2.45763	0.893764	0.273869	0.003	14.2069	3.58635	1.90059	0.387355	11.7493	2.69259	1.62672	0.384355	16.3761	5.19227	2.25472	0.418028	701.154	222.31	96.5369	17.8981	15.9581	0.974473
Kenton County, Kentucky	21117	2	159720	16.0151	11.5141	2.22847	0.037561	0.789084	0.399084	0.249084	0.037561	97.1463	24.5233	12.9962	2.64872	96.3572	24.1242	12.7471	2.61116	112.372	35.6383	14.9756	2.64872	703.558	223.13	93.7613	16.5835	109.724	0.976429
Knott County, Kentucky	21119	6	16346	3.77885	2.37117	0.485851	0.003	2.46459	1.40975	0.314842	0.003	7.48456	2.5136	1.33391	0.274937	5.01997	1.10386	1.01906	0.271937	8.79882	3.47503	1.50491	0.274937	538.286	212.592	92.0662	16.8198	8.52388	0.968753
Knox County, Kentucky	21121	5	31883	3.73915	2.50765	0.561895	0.011	0.917984	0.447866	0.195118	0.011	19.392	4.89527	2.59426	0.528729	18.474	4.4474	2.39914	0.517729	22.2132	6.95505	2.96103	0.528729	696.71	218.143	92.8718	16.5834	21.6845	0.976198
Larue County, Kentucky	21123	4	14193	2.03931	1.61618	0.795334	0.0836732	0.712901	0.647901	0.622901	0.0836732	8.5887	1.95726	0.986537	0.217909	7.8758	1.30936	0.363636	0.134236	9.91511	2.92554	1.15897	0.217909	698.591	206.125	81.6578	15.3533	9.6972	0.978023
Laurel County, Kentucky	21125	5	58849	15.0483	7.28157	1.92488	0.0509991	9.45249	3.19665	1.19742	0.0509991	35.7934	9.03559	4.78842	0.975916	26.3409	5.83893	3.591	0.924917	41.3892	13.1205	5.51587	0.975916	703.312	222.952	93.7293	16.5834	40.4133	0.976421
Lawrence County, Kentucky	21127	6	15860	28.7132	1.75753	0.539999	0.127243	27.4282	0.815778	0.360934	0.122131	7.26111	2.43856	1.29408	0.266729	-20.1671	1.62278	0.933149	0.144598	8.54607	3.38031	1.47315	0.271841	538.844	213.134	92.8845	17.14	8.27423	0.968191
Lee County, Kentucky	21129	6	7887	1.1861	0.728387	0.189014	0.0091122	0.44	0.18	0.08	0.004	4.79707	1.21096	0.641749	0.130793	4.35707	1.03096	0.561749	0.126793	5.54317	1.75934	0.750764	0.135905	702.824	223.069	95.19	17.2316	5.40727	0.975482
Leslie County, Kentucky	21131	6	11310	2.66526	1.75687	0.354815	0.0102244	1.56139	0.934796	0.186595	0	5.17866	1.73919	0.922946	0.190232	3.61727	0.804399	0.736351	0.190232	6.28253	2.56127	1.09117	0.200457	555.485	226.461	96.478	17.7238	6.08207	0.968093
Letcher County, Kentucky	21133	6	24519	6.05487	3.84022	0.834707	0.0408976	3.94096	2.26723	0.463734	0	11.2268	3.77041	2.00086	0.412405	7.28588	1.50318	1.53712	0.412405	13.3408	5.3434	2.37183	0.453303	544.099	217.929	96.7344	18.4878	12.8874	0.966021
Lewis County, Kentucky	21135	6	13870	2.53404	1.60528	0.571172	0.0382244	1.18	0.595	0.37	0.028	8.43608	2.12958	1.12857	0.230012	7.25608	1.53458	0.758574	0.202012	9.79012	3.13986	1.32975	0.240236	705.848	226.378	95.8721	17.3206	9.54988	0.975461
Lincoln County, Kentucky	21137	5	24742	4.98503	3.53569	1.8677	0.170785	2.74672	1.90172	1.57672	0.170785	15.053	3.79992	2.01378	0.410423	12.3062	1.89821	0.437059	0.239637	17.2913	5.43389	2.30476	0.410423	698.863	219.622	93.1516	16.5881	16.8808	0.976264
Livingston County, Kentucky	21139	5	9519	5.84373	4.34733	1.0712	0.0658976	4.94564	3.69172	0.954449	0.0658976	13.1204	1.46348	0.77649	0.159806	8.17475	-2.22824	-0.177958	0.0939083	14.0185	2.11909	0.893242	0.159806	1472.68	222.616	93.8378	16.7881	13.8587	0.9886
Logan County, Kentucky	21141	6	26835	5.78678	4.10409	2.09429	0.230132	3.2445	2.24822	1.7638	0.230132	36.9877	4.1257	2.189	0.450508	33.7432	1.87747	0.425207	0.220377	39.5299	5.98156	2.5195	0.450508	1473.07	222.902	93.8886	16.7881	39.0794	0.988603
Lyon County, Kentucky	21143	6	8314	10.9195	1.9927	0.720169	0.0859227	10.132	1.41779	0.617786	0.0859227	11.4595	1.27822	0.678195	0.139576	1.3275	-0.139566	0.0604089	0.0536536	12.247	1.85314	0.780577	0.139576	1473.06	222.893	93.8871	16.7881	12.1075	0.988603
McCracken County, Kentucky	21145	5	65565	187.29	14.7556	4.05038	0.196047	180.989	10.1563	3.23132	0.196047	90.3706	10.0802	5.34831	1.10071	-90.6189	-0.0761493	2.11699	0.904665	96.6711	14.6795	6.16737	1.10071	1474.43	223.892	94.065	16.7881	95.5704	0.988614
McCreary County, Kentucky	21147	6	18306	3.00854	1.76596	0.437993	0.0244488	1.24	0.46	0.16	0.004	25.2318	2.81442	1.49327	0.307323	23.9918	2.35442	1.33327	0.303323	27.0004	4.12038	1.77126	0.327772	1474.95	225.084	96.7586	17.9051	26.6726	0.98786
McLean County, Kentucky	21149	4	9531	2.69916	2.26913	1.67186	0.22002	1.8287	1.6337	1.5587	0.22002	12.7027	1.46987	0.782018	0.164556	10.874	-0.163827	-0.776684	-0.0554634	13.5731	2.10531	0.895177	0.164556	1424.1	220.89	93.9227	17.2654	13.4086	0.987876
Madison County, Kentucky	21151	5	82916	16.4773	9.78798	3.04584	0.179571	8.46358	3.93796	2.00406	0.179571	50.4316	12.7308	6.74671	1.37503	41.968	8.79283	4.74265	1.19546	58.4453	18.5808	7.78849	1.37503	704.873	224.092	93.9323	16.5834	57.0702	0.976473
Magoffin County, Kentucky	21153	6	13333	2.17289	1.62577	0.400238	0.0284488	0.820931	0.615201	0.17573	0.008	8.10946	2.04713	1.08488	0.221106	7.28853	1.43193	0.909149	0.213106	9.46142	3.05769	1.30939	0.241555	709.624	229.333	98.2065	18.1171	9.21987	0.974469
Marion County, Kentucky	21155	6	19820	8.17778	4.47396	2.07343	0.181459	6.28488	3.09215	1.82736	0.181459	12.055	3.04313	1.61271	0.328683	5.77013	-0.0490144	-0.214642	0.147224	13.9479	4.42495	1.85879	0.328683	703.729	223.257	93.7835	16.5834	13.6192	0.976435
Marshall County, Kentucky	21157	6	31448	50.0802	10.6224	3.2736	0.152054	47.0405	8.40344	2.87844	0.152054	43.3459	4.83491	2.5653	0.527952	-3.69462	-3.56853	-0.313143	0.375898	46.3856	7.05388	2.96046	0.527952	1474.99	224.303	94.1381	16.7881	45.8577	0.988618
Martin County, Kentucky	21159	6	12929	7.12793	3.58727	0.818925	0.0061122	5.85149	2.63668	0.639808	0.001	5.91997	1.98816	1.05506	0.217464	0.0684832	-0.648525	0.415255	0.216464	7.19641	2.93875	1.23418	0.222576	556.61	227.299	95.4583	17.2152	6.97384	0.969071
Mason County, Kentucky	21161	5	17490	158.871	5.46018	1.94937	0.16518	157.199	4.23601	1.72001	0.160068	10.6379	2.68539	1.42313	0.290044	-146.561	-1.55062	-0.296886	0.129976	12.3097	3.90956	1.65248	0.295156	703.813	223.531	94.4817	16.8757	12.0145	0.976022
Meade County, Kentucky	21163	4	28602	14.2404	6.74939	1.98747	0.05	11.8224	4.9843	1.67314	0.05	17.3051	3.94362	1.98774	0.439058	5.48265	-1.04068	0.314598	0.389058	19.723	5.7087	2.30207	0.439058	689.568	199.591	80.4863	15.3506	19.284	0.977739
Menifee County, Kentucky	21165	5	6306	1.7632	0.941324	0.286769	0.01	1.15527	0.497529	0.207737	0.01	3.83547	0.968214	0.513107	0.104575	2.6802	0.470684	0.305369	0.0945749	4.4434	1.41201	0.592138	0.104575	704.631	223.915	93.9008	16.5834	4.33883	0.976465
Mercer County, Kentucky	21167	6	21331	58.3784	3.26459	1.50616	0.144569	56.3474	1.78192	1.24212	0.144569	12.974	3.27513	1.73566	0.353741	-43.3733	1.49321	0.493536	0.209171	15.0051	4.7578	1.9997	0.353741	703.441	223.046	93.7461	16.5834	14.6514	0.976425
Metcalfe County, Kentucky	21169	5	10099	2.06954	1.69705	1.1082	0.108337	1.17145	1.04145	0.99145	0.108337	13.9198	1.55265	0.823802	0.169543	12.7484	0.511202	-0.167648	0.0612064	14.8179	2.20826	0.940554	0.169543	1467.27	218.661	93.1334	16.7881	14.6484	0.988558
Monroe County, Kentucky	21171	6	10963	4.16916	2.8437	1.80371	0.165449	3.11908	2.07715	1.6672	0.165449	15.1107	1.68549	0.894281	0.184048	11.9916	-0.391662	-0.77292	0.0185991	16.1608	2.45204	1.03079	0.184048	1474.12	223.665	94.0245	16.7881	15.9767	0.988611
Montgomery County, Kentucky	21173	5	26499	5.20991	3.48709	1.55841	0.114224	2.66763	1.62376	1.20387	0.104	16.1173	4.06862	2.15617	0.439444	13.4497	2.44485	0.952302	0.335444	18.6596	5.93194	2.51071	0.449668	704.164	223.855	94.7473	16.9692	18.21	0.975902
Morgan County, Kentucky	21175	6	13923	2.75641	1.64398	0.571344	0.0434488	1.56817	0.776566	0.416874	0.0434488	8.46831	2.13772	1.13289	0.230891	6.90014	1.36115	0.716013	0.187442	9.65655	3.00513	1.28736	0.230891	693.568	215.839	92.4626	16.5834	9.42566	0.97609
Muhlenberg County, Kentucky	21177	6	31499	281.627	5.67696	2.25207	0.328308	278.496	3.3741	1.84372	0.328308	41.981	4.85779	2.58449	0.543842	-236.515	1.48369	0.740772	0.215533	45.112	7.16065	2.99284	0.543842	1432.17	227.329	95.0139	17.2654	44.5681	0.987945
Nelson County, Kentucky	21179	5	43437	11.906	7.24964	3.26174	0.424283	7.77481	4.23386	2.72469	0.424283	26.2853	5.9901	3.01925	0.666901	18.5105	1.75624	0.29456	0.242618	30.4165	9.00588	3.5563	0.666901	700.244	207.332	81.8727	15.3533	29.7496	0.978074
Nicholas County, Kentucky	21181	6	7135	2.59229	1.49949	0.74328	0.0664488	1.86	0.95	0.6	0.046	4.33543	1.09442	0.579991	0.118206	2.47543	0.144422	-0.020009	0.0722065	5.06771	1.64391	0.723271	0.138655	710.261	230.401	101.369	19.4331	4.92906	0.972639
Ohio County, Kentucky	21183	6	23842	62.106	4.44351	1.6497	0.171705	59.6901	2.6622	1.33427	0.171705	31.776	3.67692	1.95624	0.411641	-27.9141	1.01473	0.621962	0.239936	34.1919	5.45824	2.27167	0.411641	1434.1	228.934	95.28	17.2654	33.7802	0.987961
Oldham County, Kentucky	21185	2	60316	11.2013	6.12187	1.76206	0.144693	6.02	2.25	0.8	0.022	36.4994	8.31776	4.19248	0.926049	30.4794	6.06776	3.39248	0.904049	41.6807	12.1896	5.15455	1.04874	691.039	202.096	85.459	17.3875	40.6319	0.974839
Owen County, Kentucky	21187	6	10841	2.63549	1.84316	1.03799	0.187142	1.62687	1.10687	0.906869	0.187142	6.59194	1.66405	0.881866	0.179731	4.96507	0.557181	-0.0250029	-0.00741069	7.60056	2.40034	1.01299	0.179731	701.094	221.414	93.4404	16.5788	7.42083	0.976353
Owsley County, Kentucky	21189	6	4755	0.695953	0.450306	0.143315	0.0142244	0.267634	0.137634	0.0876335	0.0142244	2.89211	0.730076	0.386905	0.0788541	2.62448	0.592442	0.299271	0.0646297	3.32043	1.04275	0.442586	0.0788541	698.302	219.295	93.0781	16.5834	3.24157	0.976252
Pendleton County, Kentucky	21191	2	14877	4.6921	3.49532	1.30509	0.243017	3.29661	2.47662	1.12368	0.243017	9.04795	2.28404	1.21043	0.246695	5.75134	-0.192578	0.0867509	0.00367777	10.4434	3.30275	1.39184	0.246695	701.986	222.004	93.5568	16.5823	10.1967	0.976378
Perry County, Kentucky	21193	6	28712	9.7054	6.02057	1.2023	0.003	6.76719	3.83498	0.817206	0.003	13.1467	4.41518	2.34303	0.482931	6.37956	0.580203	1.52582	0.479931	16.085	6.60078	2.72812	0.482931	560.217	229.896	95.0169	16.8198	15.602	0.969976
Pike County, Kentucky	21195	6	65024	17.4567	10.0932	2.06762	0.001	12.0119	6.09864	1.35827	0.001	29.7734	9.99906	5.30625	1.09369	17.7615	3.90042	3.94798	1.09269	35.2182	13.9936	6.0156	1.09369	541.618	215.207	92.5135	16.8198	34.1245	0.968945
Powell County, Kentucky	21197	6	12613	3.04366	2.08768	0.902692	0.061	1.84159	1.21017	0.746422	0.061	7.67154	1.93658	1.02629	0.209166	5.82995	0.726415	0.279872	0.148166	8.87361	2.81409	1.18256	0.209166	703.529	223.111	93.7575	16.5834	8.66444	0.976428
Pulaski County, Kentucky	21199	5	63063	47.1406	8.93632	3.2664	0.275434	41.1303	4.54882	2.48506	0.275434	86.922	9.69551	5.14422	1.05871	45.7917	5.14669	2.65915	0.783273	92.9323	14.083	5.92555	1.05871	1473.64	223.317	93.9625	16.7881	91.8736	0.988608
Robertson County, Kentucky	21201	6	2282	0.317251	0.268754	0.160984	0.0212244	0.11	0.11	0.11	0.011	1.38797	0.350375	0.185682	0.0378433	1.27797	0.240375	0.0756817	0.0268433	1.59522	0.509129	0.236665	0.0480677	699.044	223.107	103.71	21.0638	1.54715	0.969868
Rockcastle County, Kentucky	21203	5	17056	3.97816	2.3904	0.768321	0.0381122	2.33397	1.18641	0.542555	0.033	10.3739	2.61875	1.38781	0.282846	8.03992	1.43234	0.845257	0.249846	12.0181	3.82275	1.61358	0.287959	704.625	224.129	94.6047	16.8831	11.7301	0.97604
Rowan County, Kentucky	21205	6	23333	7.91976	3.93915	1.30445	0.0644488	5.64	2.26	0.96	0.044	14.1917	3.58251	1.89856	0.38694	8.55171	1.32251	0.938559	0.34294	16.4715	5.26166	2.24301	0.407389	705.93	225.503	96.1304	17.4598	16.0641	0.975267
Russell County, Kentucky	21207	6	17565	38.0061	23.3578	21.5214	2.13791	36.3205	22.1273	21.3023	2.13791	24.2146	2.70096	1.43307	0.294933	-12.1058	-19.4263	-19.8692	-1.84298	25.9003	3.93148	1.6522	0.294933	1474.54	223.825	94.0622	16.791	25.6053	0.988613
Scott County, Kentucky	21209	3	47173	7.32533	4.85001	1.8181	0.2596	3.2632	1.88466	1.29003	0.2596	28.6918	7.24287	3.83837	0.782289	25.4286	5.35821	2.54834	0.522689	32.7539	10.2082	4.36645	0.782289	694.336	216.4	92.5624	16.5834	31.9716	0.976116
Shelby County, Kentucky	21211	2	42074	6.14548	4.86863	2.38951	0.45619	2.13862	1.94362	1.86862	0.456191	25.4605	5.80214	2.92451	0.645974	23.3219	3.85851	1.05588	0.189784	29.4674	8.72714	3.4454	0.645974	700.37	207.424	81.889	15.3533	28.8214	0.978078
Simpson County, Kentucky	21213	6	17327	3.01236	1.97182	0.700618	0.0534488	1.3129	0.716298	0.431607	0.033	23.8824	2.66391	1.41341	0.290887	22.5695	1.94761	0.981803	0.257887	25.5819	3.91943	1.68242	0.311336	1476.42	226.204	97.0982	17.9683	25.2706	0.98783
Spencer County, Kentucky	21215	2	17061	2.30053	1.80279	0.816142	0.145581	0.697785	0.632785	0.607785	0.145581	10.3242	2.35276	1.18589	0.261942	9.62645	1.71998	0.578102	0.116362	11.927	3.52277	1.39424	0.261942	699.078	206.481	81.7211	15.3533	11.665	0.978038
Taylor County, Kentucky	21217	5	24512	7.3503	3.9323	1.47286	0.0966732	5.0429	2.2479	1.1729	0.0966732	14.9088	3.76354	1.99449	0.406492	9.8659	1.51563	0.821592	0.309819	17.2162	5.44793	2.29445	0.406492	702.358	222.256	93.6053	16.5834	16.8097	0.976389
Todd County, Kentucky	21219	6	12460	3.87183	3.41727	2.64604	0.373815	2.66977	2.53977	2.48977	0.373815	17.1741	1.91564	1.0164	0.20918	14.5043	-0.62413	-1.47337	-0.164635	18.3761	2.79314	1.17266	0.20918	1474.81	224.169	94.1142	16.7881	18.167	0.988617
Trigg County, Kentucky	21221	3	14339	4.40556	2.9827	1.69235	0.398966	2.05672	1.00318	0.53354	0.036	19.764	2.20452	1.16967	0.240724	17.7073	1.20135	0.63613	0.204724	22.1128	4.18405	2.32848	0.603691	1542.14	291.795	162.388	42.1013	21.5091	0.9727
Trimble County, Kentucky	21223	2	8809	153.828	2.13799	0.757172	0.11388	153.027	1.55299	0.652994	0.11388	5.33065	1.21479	0.612302	0.135247	-147.696	-0.338205	-0.040692	0.021367	6.13202	1.79979	0.71648	0.135247	696.108	204.313	81.335	15.3533	5.99677	0.977944
Union County, Kentucky	21225	6	15007	6.83731	5.02517	2.09658	0.455425	5.14008	3.75235	1.87333	0.455425	20.0009	2.31439	1.23132	0.259101	14.8608	-1.43797	-0.642009	-0.196323	21.6982	3.58721	1.45457	0.259101	1445.87	239.036	96.9259	17.2654	21.4391	0.988059
Warren County, Kentucky	21227	4	113792	27.9358	15.6218	5.34999	0.51919	17.1311	7.73438	3.94537	0.51919	156.829	17.4931	9.28142	1.91017	139.697	9.75867	5.33605	1.39098	167.633	25.3805	10.686	1.91017	1473.15	223.043	93.9085	16.7865	165.723	0.988605
Washington County, Kentucky	21229	6	11717	3.95076	2.55105	1.47113	0.212917	2.85924	1.75424	1.32924	0.212917	7.12657	1.79901	0.953389	0.194308	4.26733	0.0447745	-0.375847	-0.0186095	8.21809	2.59582	1.09529	0.194308	701.382	221.543	93.4784	16.5834	8.02378	0.976356
Wayne County, Kentucky	21231	6	20813	4.27251	2.75258	1.14402	0.0802244	2.2829	1.30016	0.885371	0.0802244	28.6873	3.19986	1.69777	0.349411	26.4044	1.89969	0.812401	0.269186	30.6769	4.65227	1.95642	0.349411	1473.93	223.527	94	16.7881	30.3275	0.98861
Webster County, Kentucky	21233	6	13621	59.512	2.79062	1.31802	0.15635	58.167	1.80277	1.14271	0.15635	18.1537	2.10064	1.1176	0.235172	-40.0133	0.297864	-0.0251083	0.0788216	19.4987	3.08849	1.29291	0.235172	1431.52	226.745	94.9206	17.2654	19.2635	0.987939
Whitley County, Kentucky	21235	5	35637	8.52816	4.77869	1.47533	0.0827854	5.03252	2.20077	0.936753	0.047	21.6753	5.47165	2.89971	0.590983	16.6428	3.27088	1.96296	0.543983	25.1709	8.04958	3.43829	0.626768	706.315	225.877	96.4808	17.5876	24.5442	0.9751
Wolfe County, Kentucky	21237	6	7355	0.819387	0.582783	0.176441	0.0121122	0.17	0.105	0.08	0.007	4.47349	1.12928	0.598462	0.121971	4.30349	1.02428	0.518462	0.114971	5.12288	1.60706	0.694903	0.127083	696.517	218.499	94.4803	17.2785	4.9958	0.975193
Woodford County, Kentucky	21239	3	24939	5.669	3.41354	1.38752	0.165468	3.33397	1.70897	1.08397	0.165468	15.1685	3.8291	2.02924	0.413573	11.8345	2.12013	0.945268	0.248105	17.5035	5.53367	2.33279	0.413573	701.854	221.888	93.5398	16.5834	17.09	0.976372
Acadia Parish, Louisiana	22001	3	61773	317.957	313.241	307.54	91.8972	310.123	307.522	306.522	91.8972	70.7125	38.0658	32.0912	10.4388	-239.41	-269.456	-274.43	-81.4584	78.5466	43.7847	33.1096	10.4388	1271.54	708.8	535.989	168.986	68.1078	0.867101
Allen Parish, Louisiana	22003	6	25764	34.2079	31.6134	28.2368	8.7363	29.4135	28.1135	27.6135	8.7363	29.4925	15.8763	13.3845	4.35375	0.0789298	-12.2372	-14.2291	-4.38255	34.2869	19.3762	14.0077	4.35375	1330.81	752.067	543.694	168.986	29.9331	0.87302
Ascension Parish, Louisiana	22005	3	107215	229.539	85.0791	24.0884	0.134346	218.43	76.925	22.5	0.073	224.26	92.4693	48.6531	12.0744	5.8299	15.5443	26.1531	12.0014	235.369	100.623	50.2415	12.1357	2195.3	938.52	468.605	113.191	223.233	0.948439
Assumption Parish, Louisiana	22007	6	23421	29.3362	12.8062	4.26168	0.20002	24.68	9.34	3.44	0.108	48.9989	20.2038	10.6303	2.63815	24.3189	10.8638	7.19031	2.53015	53.6552	23.67	11.452	2.73017	2290.9	1010.63	488.963	116.57	50.925	0.949116
Avoyelles Parish, Louisiana	22009	6	42073	78.1016	75.3766	72.5462	17.3354	74.5092	72.7542	72.0792	17.3354	48.1616	25.9263	21.857	7.10975	-26.3476	-46.8279	-50.2222	-10.2257	51.754	28.5487	22.324	7.10975	1230.1	678.551	530.602	168.986	44.6442	0.862624
Beauregard Parish, Louisiana	22011	5	35654	39.6049	19.7588	9.45893	1.93228	34.2302	15.8352	8.76021	1.93228	40.8137	21.9708	18.5223	6.02503	6.58348	6.13554	9.76211	4.09275	46.1884	25.8943	19.221	6.02503	1295.46	726.266	539.099	168.986	40.1634	0.869555
Bienville Parish, Louisiana	22013	6	14353	18.7017	8.83466	2.29937	0.0815708	15.7863	6.65424	1.75209	0.01	16.4301	8.84462	7.45641	2.42546	0.643772	2.19038	5.70433	2.41546	19.3454	11.025	8.00369	2.49703	1347.83	768.135	557.632	173.972	16.8484	0.870924
Bossier Parish, Louisiana	22015	3	116979	23.1574	14.3441	4.19507	0.528995	8.18	3.045	1.07	0.028	133.908	72.0849	60.7708	19.7678	125.728	69.0399	59.7008	19.7398	148.885	83.384	63.8959	20.2688	1272.75	712.812	546.217	173.269	128.616	0.863863
Caddo Parish, Louisiana	22017	3	254969	155.962	46.5846	20.0158	3.94595	130.055	27.6729	16.6479	3.94595	291.867	157.117	132.457	43.0862	161.812	129.444	115.809	39.1402	317.773	176.029	135.825	43.0862	1246.32	690.394	532.711	168.986	274.687	0.864412
Calcasieu Parish, Louisiana	22019	4	192768	492.723	124.587	51.2313	7.03521	467.839	106.421	47.9964	7.03521	449.509	234.666	128.175	27.7859	-18.3299	128.245	80.1786	20.7507	474.393	252.831	131.41	27.7859	2460.95	1311.58	681.7	144.141	446.607	0.941429
Caldwell Parish, Louisiana	22021	6	10132	5.41258	4.80564	3.93467	1.35762	4.12762	3.86762	3.76762	1.35762	11.5983	6.24355	5.26359	1.71217	7.47064	2.37593	1.49597	0.354545	12.8832	7.18157	5.43064	1.71217	1271.54	708.801	535.989	168.986	11.171	0.867101
Cameron Parish, Louisiana	22023	4	6839	36.8778	33.1845	31.1881	11.2104	35.7172	32.3372	31.0372	11.2104	15.9476	8.32545	4.54738	0.985783	-19.7696	-24.0118	-26.4899	-10.2246	17.1082	9.1727	4.69825	0.985784	2501.57	1341.23	686.98	144.141	16.1224	0.94238
Catahoula Parish, Louisiana	22025	6	10407	41.6089	40.5682	39.0917	13.7748	39.4397	38.9847	38.8097	13.7748	11.9131	6.41302	5.40646	1.75864	-27.5266	-32.5716	-33.4032	-12.0161	14.0823	7.99655	5.68846	1.75864	1353.16	768.382	546.599	168.986	12.3236	0.875117
Claiborne Parish, Louisiana	22027	6	17195	3.79465	2.37756	0.577059	0.0284488	1.48728	0.678258	0.229019	0.008	15.9021	10.599	8.93587	2.90875	14.4148	9.9207	8.70685	2.90075	18.2095	12.2983	9.28391	2.9292	1059	715.223	539.919	170.352	15.2803	0.839139
Concordia Parish, Louisiana	22029	5	20822	59.1795	57.4365	54.7575	19.3131	55.1312	54.4812	54.2312	19.3131	23.8353	12.831	10.8171	3.51863	-31.296	-41.6503	-43.4142	-15.7944	27.8836	15.7862	11.3434	3.51863	1339.14	758.151	544.777	168.986	24.3649	0.87381
De Soto Parish, Louisiana	22031	3	26656	179.414	20.2408	5.03789	0.212919	175.421	17.3259	4.51879	0.212919	30.5135	16.426	13.8478	4.50449	-144.908	-0.899871	9.32905	4.29157	34.5066	19.3409	14.3669	4.50449	1294.51	725.574	538.976	168.986	30.0021	0.86946
East Baton Rouge Parish, Louisiana	22033	3	440171	226.347	113.089	25.8817	0.160805	138.03	48.525	14.1	0.033	920.894	379.713	199.788	49.5819	782.864	331.188	185.688	49.5489	1009.21	444.277	211.569	49.7097	2292.77	1009.33	480.653	112.933	959.501	0.950744
East Carroll Parish, Louisiana	22035	6	7759	36.7348	36.1332	35.1545	12.9236	35.2288	35.0338	34.9588	12.9236	7.17561	4.78263	4.03218	1.31253	-28.0531	-30.2511	-30.9266	-11.6111	8.68163	5.88203	4.22797	1.31253	1118.91	758.091	544.911	169.162	7.3691	0.848815
East Feliciana Parish, Louisiana	22037	3	20267	5.43694	3.4148	1.1906	0.151693	2.19	0.955	0.48	0.029	42.3921	17.4796	9.19696	2.28244	40.2021	16.5246	8.71696	2.25344	45.639	19.9394	9.90755	2.40513	2251.89	983.835	488.852	118.672	43.2339	0.947301
Evangeline Parish, Louisiana	22039	6	33984	114.486	110.158	104.39	28.9706	106.514	104.338	103.354	28.9706	38.902	20.9417	17.6548	5.74282	-67.6119	-83.3963	-85.699	-23.2277	46.8743	26.7614	18.6912	5.74282	1379.3	787.471	549.999	168.986	41.1315	0.877485
Franklin Parish, Louisiana	22041	6	20767	56.6088	54.3272	52.2432	16.1802	54.1771	52.5521	51.9271	16.1802	19.2056	12.8007	10.7922	3.51299	-34.9715	-39.7513	-41.1349	-12.6672	21.6373	14.5759	11.1083	3.51299	1041.91	701.878	534.901	169.162	18.1243	0.837642
Grant Parish, Louisiana	22043	4	22309	7.6796	5.21568	2.12918	0.487547	3.36877	2.06877	1.56877	0.487547	25.5375	13.7473	11.5896	3.76991	22.1687	11.6785	10.0208	3.28236	29.8483	16.8942	12.15	3.76991	1337.95	757.281	544.622	168.986	26.0784	0.873698
Iberia Parish, Louisiana	22045	3	73240	44.3709	29.5949	17.4176	2.0403	31.3003	20.0534	15.7184	2.0403	83.839	45.132	38.0483	12.3765	52.5387	25.0787	22.3299	10.3362	96.9096	54.6736	39.7475	12.3765	1323.18	746.499	542.702	168.986	84.5331	0.872288
Iberville Parish, Louisiana	22047	3	33387	630.926	219.844	78.481	2.55156	626.021	215.969	76.8937	2.1477	69.8487	28.8008	15.1537	3.76073	-556.173	-187.168	-61.74	1.61303	74.7537	32.6761	16.7409	4.16459	2239.01	978.708	501.421	124.737	70.5891	0.944289
Jackson Parish, Louisiana	22049	6	16274	5.72274	2.69	0.728357	0.012	4.12	1.52	0.52	0.012	18.6291	10.0284	8.45438	2.75008	14.5091	8.50838	7.93438	2.73808	20.2318	11.1984	8.66273	2.75008	1243.2	688.115	532.305	168.986	17.4818	0.864072
Jefferson Parish, Louisiana	22051	2	432552	226.431	60.5208	12.1331	0.109264	158.549	10.9374	3.21237	0.0683659	1155.45	793.293	698.46	250.268	996.896	782.355	695.247	250.199	1223.33	842.876	707.381	250.309	2828.16	1948.61	1635.37	578.679	973.018	0.795387
Jefferson Davis Parish, Louisiana	22053	6	31594	242.397	239.328	235.495	73.5373	237.05	235.425	234.8	73.5373	73.6729	38.4609	21.0074	4.55401	-163.377	-196.964	-213.792	-68.9833	79.02	42.3643	21.7025	4.55401	2501.11	1340.9	686.92	144.141	74.466	0.942369
Lafayette Parish, Louisiana	22055	3	221578	73.0851	42.0341	21.1384	4.22857	45.1338	21.6297	17.5047	4.22857	253.644	136.541	115.11	37.4436	208.51	114.911	97.6055	33.215	281.595	156.946	118.744	37.4436	1270.86	708.308	535.901	168.986	244.151	0.86703
Lafourche Parish, Louisiana	22057	4	96318	57.9672	42.9083	24.8524	2.05356	33.18	24.795	21.57	2.028	110.566	59.5196	50.1777	16.322	77.3858	34.7246	28.6077	14.294	135.353	77.6329	53.4601	16.3476	1405.27	806.006	555.038	169.725	119.005	0.879223
La Salle Parish, Louisiana	22059	6	14890	3.4816	2.15321	0.634572	0.0548976	1.2	0.42	0.12	0	17.0448	9.17553	7.73538	2.5162	15.8448	8.75553	7.61538	2.5162	19.3264	10.9087	8.24996	2.5711	1297.95	732.622	554.06	172.673	16.7553	0.866964
Lincoln Parish, Louisiana	22061	5	46735	11.6314	6.50389	1.44008	0.01	5.4	1.955	0.63	0.01	43.221	28.8073	24.2872	7.9058	37.821	26.8523	23.6572	7.8958	49.4524	33.3562	25.0972	7.9058	1058.14	713.731	537.012	169.162	41.5466	0.840133
Livingston Parish, Louisiana	22063	3	128026	25.1619	14.9184	3.38306	0.0676732	9.77	3.66	1.31	0.037	267.872	110.452	58.1147	14.4225	258.102	106.792	56.8047	14.3855	283.264	121.71	60.1878	14.4532	2212.55	950.668	470.122	112.892	268.81	0.948976
Madison Parish, Louisiana	22065	6	12093	58.1484	56.8504	55.6382	20.2816	56.7114	55.8014	55.4514	20.2816	11.1837	7.4541	6.28447	2.04568	-45.5277	-48.3473	-49.167	-18.236	12.6207	8.50306	6.47127	2.04568	1043.64	703.139	535.126	169.162	10.575	0.83791
Morehouse Parish, Louisiana	22067	5	27979	115.284	113.201	110.96	40.8228	112.383	111.083	110.583	40.8228	25.8753	17.2462	14.5401	4.73299	-86.5077	-93.8368	-96.0429	-36.0898	28.7768	19.3643	14.9173	4.73299	1028.51	692.101	533.16	169.162	24.0438	0.835527
Natchitoches Parish, Louisiana	22069	5	39566	48.1629	32.2249	22.9596	5.9716	41.8625	27.6255	22.1406	5.9716	45.2918	24.3814	20.5546	6.6861	3.42934	-3.24413	-1.58598	0.714495	51.5923	28.9807	21.3737	6.6861	1303.95	732.465	540.203	168.986	44.9062	0.870405
Orleans Parish, Louisiana	22071	1	343829	281.746	84.3246	21.8741	0.0487134	252.634	63.0655	18.0655	0.038489	918.446	630.576	555.195	198.934	665.811	567.511	537.13	198.896	947.558	651.835	559.004	198.944	2755.9	1895.81	1625.82	578.614	748.613	0.790045
Ouachita Parish, Louisiana	22073	4	153720	97.3999	56.0168	30.4591	8.48181	73.345	38.4567	27.332	8.48181	142.162	94.7526	79.885	26.0036	68.817	56.2959	52.553	17.5218	166.217	112.313	83.0121	26.0036	1081.3	730.632	540.022	169.162	140.213	0.843556
Plaquemines Parish, Louisiana	22075	2	23042	117.743	43.7412	12.0286	0.0070336	111.139	38.92	11.17	0.0070336	61.5504	42.2586	37.2069	13.3317	-49.5883	3.33858	26.0368	13.3247	68.1548	47.0798	38.0655	13.3317	2957.85	2043.22	1652	578.584	54.8231	0.80439
Pointe Coupee Parish, Louisiana	22077	3	22802	38.6648	32.1612	27.1687	7.03419	33.6355	28.4898	26.5148	7.03419	47.7039	19.6698	10.3494	2.56843	14.0684	-8.82003	-16.1655	-4.46576	52.7332	23.3412	11.0032	2.56843	2312.66	1023.65	482.553	112.641	50.1648	0.951294
Rapides Parish, Louisiana	22079	4	131613	227.362	51.8163	34.6513	9.0872	205.546	35.8901	31.8151	9.0872	150.659	81.1027	68.3732	22.2408	-54.8863	45.2126	36.5581	13.1535	172.476	97.0289	71.2094	22.2408	1310.48	737.229	541.051	168.986	150.235	0.87105
Red River Parish, Louisiana	22081	6	9091	6.3538	5.28451	2.77835	0.772493	5.30373	4.51795	2.64184	0.772493	10.4066	5.60207	4.72279	1.53625	5.10288	1.08411	2.08096	0.763758	11.4567	6.36862	4.8593	1.53625	1260.22	700.541	534.518	168.986	9.92043	0.865908
Richland Parish, Louisiana	22083	6	20725	42.9123	40.7484	38.2092	13.8557	39.472	38.237	37.762	13.8557	19.1667	12.7748	10.7703	3.50589	-20.3052	-25.4621	-26.9916	-10.3498	22.6071	15.2863	11.2176	3.50589	1090.81	737.578	541.259	169.162	19.1012	0.844921
Sabine Parish, Louisiana	22085	6	24233	7.15426	4.39753	0.992048	0.015	3.29939	1.58347	0.490914	0.015	27.7399	14.9329	12.5891	4.09504	24.4405	13.3494	12.0982	4.08004	31.5948	17.7469	13.0902	4.09504	1303.79	732.346	540.182	168.986	27.4997	0.870389
St. Bernard Parish, Louisiana	22087	2	35897	360.235	128.683	36.2373	0.001	353.4	123.69	35.34	0	95.8891	65.8345	57.9644	20.7694	-257.511	-57.8555	22.6244	20.7694	102.725	70.8271	58.8617	20.7704	2861.65	1973.06	1639.74	578.612	81.9541	0.797805
St. Charles Parish, Louisiana	22089	2	52780	1022.74	251.424	71.6544	0.159409	1018.26	248.126	71.0014	0.151409	141.255	96.981	85.3875	30.5955	-877.001	-151.145	14.3861	30.4441	145.742	100.278	86.0405	30.6035	2761.31	1899.93	1630.17	579.832	115.139	0.790016
St. Helena Parish, Louisiana	22091	3	11203	2.31442	1.34733	0.392675	0.014	1	0.35	0.1	0	23.4377	9.6641	5.08481	1.26191	22.4377	9.3141	4.98481	1.26191	24.7522	10.6614	5.37749	1.27591	2209.42	951.659	480.004	113.89	23.4762	0.948452
St. James Parish, Louisiana	22093	2	22102	265.828	104.816	41.4419	1.66367	246.5	86.275	24.65	0	25.3005	13.6197	11.482	3.73493	-221.199	-72.6553	-13.168	3.73493	44.6287	32.1608	28.2739	5.3986	2019.22	1455.11	1279.25	244.259	39.2301	0.879033
St. John the Baptist Parish, Louisiana	22095	2	45924	93.3926	35.6747	9.65719	0.0357854	85.6	29.96	8.56	0	122.406	84.0404	73.9939	26.513	36.8064	54.0804	65.4339	26.513	130.199	89.7551	75.0911	26.5488	2835.1	1954.43	1635.12	578.104	103.65	0.79609
St. Landry Parish, Louisiana	22097	5	83384	107.758	99.7384	91.1151	22.8602	59.4437	54.4387	52.5137	19.1452	95.451	51.383	43.3182	14.0907	36.0072	-3.05575	-9.19558	-5.05446	143.765	96.6827	81.9195	17.8057	1724.13	1159.49	982.436	213.539	125.959	0.876147
St. Martin Parish, Louisiana	22099	3	52160	55.6804	51.739	47.6387	7.39535	14.0415	11.5065	10.5315	3.75235	59.7084	32.1421	27.0972	8.81431	45.6669	20.6356	16.5657	5.06195	101.347	72.3746	64.2044	12.4573	1943.01	1387.55	1230.91	238.829	88.89	0.877083
St. Mary Parish, Louisiana	22101	5	54650	55.3826	11.3996	2.87794	0.165516	46.2865	4.74324	1.64324	0.159516	62.5587	33.6765	28.3908	9.23508	16.2722	28.9332	26.7475	9.07557	71.6549	40.3329	29.6255	9.24108	1311.16	738.022	542.095	169.096	62.4138	0.871033
St. Tammany Parish, Louisiana	22103	2	233740	49.2222	28.6603	6.01998	0.023	19.3	6.755	1.93	0	624.365	428.669	377.425	135.237	605.065	421.914	375.495	135.237	654.287	450.575	381.515	135.26	2799.21	1927.68	1632.22	578.675	519.027	0.793272
Tangipahoa Parish, Louisiana	22105	4	121097	32.9679	19.544	4.76309	0.199029	13.5831	5.39305	2.24305	0.199029	138.626	74.625	62.9122	20.4644	125.043	69.232	60.6692	20.2653	158.011	88.776	65.4322	20.4644	1304.83	733.098	540.329	168.992	137.547	0.870488
Tensas Parish, Louisiana	22107	6	5252	43.8546	43.2477	42.3767	15.5839	42.5696	42.3096	42.2096	15.5839	4.85711	3.23732	2.72935	0.888441	-37.7125	-39.0723	-39.4803	-14.6954	6.14207	4.17534	2.8964	0.888441	1169.47	795	551.484	169.162	5.25362	0.855351
Terrebonne Parish, Louisiana	22109	4	111860	16.8723	11.6566	3.80556	0.209744	3.91217	2.19574	2.12074	0.209744	127.739	68.7641	57.9712	18.8571	123.827	66.5684	55.8505	18.6474	140.699	78.225	59.656	18.8571	1257.81	699.312	533.31	168.578	121.842	0.865975
Union Parish, Louisiana	22111	4	22721	5.82885	3.11466	0.90535	0.028	3.48	1.4	0.6	0.028	21.0126	14.0052	11.8076	3.84354	17.5326	12.6052	11.2076	3.81554	23.3615	15.7198	12.113	3.84354	1028.19	691.863	533.117	169.162	19.5179	0.835475
Vermilion Parish, Louisiana	22113	3	57999	132.74	125.082	117.263	35.0537	122.916	117.911	115.986	35.0537	66.3924	35.7402	30.1306	9.80102	-56.5237	-82.1709	-85.8555	-25.2527	76.2161	42.9115	31.4077	9.80102	1314.09	739.867	541.521	168.986	66.415	0.871405
Vernon Parish, Louisiana	22115	5	52334	13.6994	7.31294	1.84032	0.032	7.62	2.875	1.05	0.032	59.9075	32.2493	27.1876	8.84371	52.2875	29.3743	26.1376	8.81171	65.9869	36.6873	27.9779	8.84371	1260.88	701.022	534.603	168.986	57.1432	0.865978
Washington Parish, Louisiana	22117	5	47168	49.6649	20.7937	6.56348	0.473537	43.3644	16.1944	5.74442	0.473537	126.004	86.5108	76.169	27.2924	82.6401	70.3163	70.4246	26.8189	132.305	91.1101	76.988	27.2924	2804.97	1931.61	1632.21	578.621	105.013	0.793716
Webster Parish, Louisiana	22119	3	41207	10.6953	6.14707	1.41564	0.0231655	6.16344	2.83506	0.814473	0.0180533	47.1703	25.3926	21.4071	6.96341	41.0069	22.5576	20.5926	6.94535	51.7022	28.7046	22.0083	6.96852	1254.69	696.596	534.091	169.11	44.7337	0.865218
West Baton Rouge Parish, Louisiana	22121	3	23788	14.9904	10.0083	4.43145	0.498947	6.88	3.89	2.74	0.228	49.7667	20.5204	10.7969	2.67949	42.8867	16.6304	8.05688	2.45149	57.8772	26.6387	12.4883	2.95044	2433.04	1119.84	524.984	124.031	54.9267	0.949022
West Carroll Parish, Louisiana	22123	6	11604	21.0501	20.2998	19.2297	6.92624	19.475	19.15	19.025	6.92624	10.7315	7.15268	6.03035	1.96296	-8.74348	-11.9973	-12.9946	-4.96328	12.3066	8.30251	6.23511	1.96296	1060.55	715.487	537.324	169.162	10.3437	0.840496
West Feliciana Parish, Louisiana	22125	3	15625	253.348	12.4815	3.77196	0.248066	251.082	10.8274	3.47738	0.248066	32.689	13.4787	7.09187	1.76001	-218.394	2.65129	3.61448	1.51194	34.9549	15.1328	7.38644	1.76001	2237.11	968.5	472.732	112.641	33.1949	0.949649
Winn Parish, Louisiana	22127	6	15313	3.53854	1.95604	0.469911	0.007	1.77	0.665	0.24	0.007	17.529	9.4362	7.95513	2.58768	15.759	8.7712	7.71513	2.58068	19.2976	10.7272	8.18505	2.58768	1260.21	700.531	534.516	168.986	16.7099	0.865906
Androscoggin County, Maine	23001	4	107702	24.754	13.2933	3.86136	0.269488	15.704	6.68685	2.68486	0.269488	42.3935	18.112	11.6177	2.90896	26.6894	11.4251	8.93285	2.63947	51.4434	24.7184	12.7942	2.90896	477.646	229.508	118.793	27.0093	48.5345	0.943453
Aroostook County, Maine	23003	6	71870	34.1246	17.1703	7.80313	1.58044	28.7775	13.2669	7.10801	1.58044	28.2893	12.0862	7.75255	1.94116	-0.488208	-1.18074	0.644538	0.360726	33.6364	15.9896	8.44767	1.94116	468.017	222.479	117.541	27.0093	31.6953	0.94229
Cumberland County, Maine	23005	3	281674	58.7401	33.7382	13.3556	0.964171	38.8025	19.1838	10.7637	0.964171	110.873	47.3687	30.3841	7.60788	72.0703	28.1849	19.6205	6.64371	130.81	61.9231	32.976	7.60788	464.403	219.84	117.072	27.0095	123.202	0.94184
Franklin County, Maine	23007	6	30768	54.5108	20.1949	5.7643	0.0414488	52.0653	18.3953	5.44527	0.0414488	12.1108	5.17417	3.31892	0.831023	-39.9544	-13.2211	-2.12635	0.789575	14.5564	6.9738	3.63794	0.831023	473.102	226.658	118.238	27.0093	13.7254	0.94291
Hancock County, Maine	23009	6	54418	78.0942	19.2798	6.52153	0.847969	73.8525	16.1833	5.9701	0.847969	21.4207	9.15166	5.87024	1.46985	-52.4318	-7.03167	-0.0998651	0.62188	25.6624	12.2481	6.42166	1.46985	471.58	225.075	118.006	27.0103	24.1926	0.942724
Kennebec County, Maine	23011	5	122151	23.1477	13.6002	5.03433	0.370029	13.7108	6.71135	3.80754	0.370029	48.0809	20.5418	13.1763	3.29922	34.37	13.8305	9.36878	2.92919	57.5177	27.4307	14.4031	3.29922	470.874	224.564	117.912	27.0093	54.2185	0.94264
Knox County, Maine	23013	6	39736	8.00472	4.42584	1.51363	0.244273	4.96504	2.03153	0.553505	0.004	15.6408	6.6823	4.28629	1.07324	10.6758	4.65076	3.73278	1.06924	18.6805	9.0766	5.24641	1.31352	470.115	228.423	132.032	33.0561	17.367	0.929685
Lincoln County, Maine	23015	6	34457	5.3761	3.04251	0.956678	0.0833464	2.83382	1.14189	0.481935	0.022	13.5629	5.79454	3.71685	0.930661	10.7291	4.65265	3.23491	0.908661	16.1052	7.69517	4.19159	0.992007	467.399	223.327	121.647	28.7897	15.1132	0.938404
Oxford County, Maine	23017	6	57833	54.3327	21.2173	6.08729	0.179703	49.7318	17.8585	5.48917	0.179703	22.7633	9.72528	6.23818	1.56198	-26.9684	-8.13326	0.749013	1.38227	27.3643	13.084	6.8363	1.56198	473.161	226.238	118.208	27.0084	25.8023	0.942919
Penobscot County, Maine	23019	4	153923	100.552	36.7627	13.4929	0.921168	89.692	28.8349	12.0811	0.921168	60.5861	25.8845	16.6033	4.1573	-29.1059	-2.95042	4.52223	3.23614	71.4461	33.8123	18.0151	4.1573	464.168	219.67	117.04	27.009	67.2888	0.941812
Piscataquis County, Maine	23021	6	17535	3.68984	2.00512	0.70749	0.104132	2.58455	1.19827	0.563803	0.104132	6.90209	2.94881	1.89148	0.473609	4.31754	1.75054	1.32768	0.369477	8.00738	3.75567	2.03517	0.473609	456.651	214.181	116.063	27.0093	7.53377	0.940853
Sagadahoc County, Maine	23023	3	35293	5.03755	2.81434	0.655816	0.0193366	2.64725	1.05824	0.309015	0.004	13.892	5.93513	3.80702	0.953241	11.2447	4.87689	3.49801	0.949241	16.2823	7.69124	4.15382	0.968577	461.345	217.925	117.695	27.4439	15.3137	0.940513
Somerset County, Maine	23025	6	52228	103.292	70.1227	55.1516	5.04747	99.3132	67.2179	54.6343	5.04747	20.5579	8.78304	5.63379	1.41064	-78.7553	-58.4349	-49.0005	-3.63682	24.5371	11.6879	6.15109	1.41064	469.808	223.786	117.774	27.0093	23.1265	0.94251
Waldo County, Maine	23027	6	38786	7.94564	4.3543	1.27158	0.0863464	4.90595	2.13533	0.876422	0.0863464	15.2669	6.52254	4.18381	1.04758	10.3609	4.38721	3.30739	0.961238	18.3066	8.74151	4.57897	1.04758	471.989	225.378	118.057	27.0093	17.259	0.942775
Washington County, Maine	23029	6	32856	72.9652	20.2871	9.45771	1.89813	70.2571	18.3102	9.10565	1.89813	12.9327	5.5253	3.54415	0.887419	-57.3244	-12.7849	-5.5615	-1.01071	15.6408	7.50223	3.8962	0.887419	476.042	228.337	118.584	27.0093	14.7534	0.943263
York County, Maine	23031	3	197131	37.5252	21.7633	6.75587	0.4266	21.2214	9.86155	4.63638	0.4266	77.5943	33.151	21.2643	5.32438	56.3729	23.2894	16.628	4.89778	93.8981	45.0527	23.3838	5.32438	476.323	228.542	118.621	27.0093	88.5737	0.943296
Allegany County, Maryland	24001	4	75087	56.1036	23.3996	6.26001	0.134805	46.9292	16.7023	5.06735	0.134805	44.5296	21.0635	16.2102	4.65127	-2.39965	4.36119	11.1429	4.51646	53.7039	27.7607	17.4029	4.65127	715.222	369.714	231.77	61.9451	49.0526	0.91339
Anne Arundel County, Maryland	24003	2	537656	83.3807	53.2514	12.1724	0.813615	22.3107	8.08459	2.3461	0.011	593.601	53.6717	32.7123	10.7714	571.29	45.5872	30.3662	10.7604	654.671	98.8386	42.5386	11.574	1217.64	183.832	79.1186	21.5269	643.097	0.982321
Baltimore County, Maryland	24005	2	805029	545.886	228.026	60.3209	1.10011	456.782	162.98	48.7374	1.10011	888.795	80.3624	48.9799	16.128	432.014	-82.618	0.242483	15.0279	977.899	145.408	60.5634	16.128	1214.74	180.625	75.2313	20.034	961.771	0.983508
Calvert County, Maryland	24009	2	88737	16.9945	9.59018	2.09453	0.0387854	7.62672	2.75172	0.876717	0.0387854	92.3243	5.52256	2.6343	0.576001	84.6976	2.77085	1.75758	0.537216	101.692	12.361	3.85211	0.576001	1145.99	139.3	43.4104	6.4911	101.116	0.994336
Caroline County, Maryland	24011	6	33066	29.4437	26.2665	22.129	7.54747	26.1277	23.8458	21.6979	7.54747	43.4619	9.27094	7.1337	2.0435	17.3341	-14.5748	-14.5642	-5.50398	46.7779	11.6916	7.56478	2.0435	1414.68	353.585	228.778	61.8006	44.7344	0.956315
Carroll County, Maryland	24013	2	167134	26.9841	16.2314	4.47444	0.362508	11.7719	5.12643	2.49685	0.362508	184.525	16.6842	10.1688	3.34837	172.753	11.5578	7.67198	2.98586	199.737	27.7892	12.1464	3.34837	1195.07	166.269	72.6747	20.034	196.389	0.983236
Cecil County, Maryland	24015	2	101108	17.7929	12.0728	4.75999	0.979532	7.80335	4.78047	3.46135	0.979532	132.896	28.3483	21.8132	6.24853	125.093	23.5679	18.3518	5.269	142.886	35.6407	23.1118	6.24853	1413.2	352.501	228.585	61.8006	136.637	0.956269
Charles County, Maryland	24017	2	146551	18.2512	11.5538	2.60894	0.145029	5.52595	2.26435	0.954658	0.145029	152.476	9.12063	4.3506	0.951278	146.95	6.85628	3.39594	0.806248	165.201	18.41	6.00488	0.951278	1127.26	125.622	40.9747	6.4911	164.249	0.994242
Dorchester County, Maryland	24019	5	32618	30.3711	26.4551	23.027	7.90844	27.2209	24.1554	22.6174	7.90844	42.873	9.14533	7.03705	2.01581	15.6522	-15.0101	-15.5804	-5.89263	46.0232	11.445	7.44658	2.01581	1410.98	350.879	228.297	61.8006	44.0074	0.9562
Frederick County, Maryland	24021	2	233385	66.7274	45.5848	25.8297	2.52425	43.7087	28.7811	22.8373	2.52425	74.4659	14.5585	6.96213	1.54865	30.7572	-14.2227	-15.8752	-0.975602	97.4846	31.3621	9.95456	1.54865	417.698	134.379	42.653	6.63559	95.9359	0.984114
Garrett County, Maryland	24023	6	30097	13.0194	8.70327	4.2866	0.402693	9.35801	5.94089	3.52212	0.28	17.8487	8.44285	6.49751	1.86436	8.49071	2.50196	2.97539	1.58436	21.5102	11.2052	7.262	1.98705	714.694	372.304	241.286	66.0217	19.5231	0.907623
Harford County, Maryland	24025	2	244826	35.002	23.6034	5.71362	0.479761	8.05931	3.93529	2.21107	0.479761	270.301	24.4399	14.8958	4.90486	262.242	20.5046	12.6847	4.42509	297.244	44.108	18.3983	4.90486	1214.1	180.161	75.1486	20.034	292.339	0.983499
Howard County, Maryland	24027	2	287085	36.6378	25.4177	5.73966	0.444537	4.5	1.64	0.54	0.01	316.957	28.6584	17.4669	5.75147	312.457	27.0184	16.9269	5.74147	349.095	52.436	22.6666	6.18601	1216	182.65	78.9543	21.5477	342.909	0.98228
Kent County, Maryland	24029	6	20197	8.12265	6.52495	4.98245	1.57255	6.32645	5.21372	4.74894	1.57255	26.5469	5.66277	4.35733	1.24819	20.2204	0.449049	-0.391616	-0.324361	28.3431	6.974	4.59083	1.24819	1403.33	345.299	227.303	61.8006	27.0949	0.955962
Montgomery County, Maryland	24031	2	971777	544.457	297.453	66.0607	1.34417	269.877	97.0094	30.3652	1.34417	1011.06	60.4787	28.8488	6.30791	741.185	-36.5306	-1.51648	4.96373	1285.64	260.922	64.5442	6.30791	1322.98	268.5	66.4187	6.4911	1279.33	0.995094
Prince George's County, Maryland	24033	2	863420	136.864	99.7542	20.3218	1.08667	3.95007	1.91806	0.43701	0	898.325	53.7351	25.632	5.60455	894.375	51.8171	25.195	5.60455	1031.24	151.571	45.5168	6.69122	1194.37	175.548	52.7169	7.74967	1024.55	0.993511
Queen Anne's County, Maryland	24035	2	47798	22.9596	18.608	14.4321	4.70032	17.0765	14.0865	12.9365	4.61632	52.7715	4.77146	2.90814	0.957587	35.695	-9.31507	-10.0284	-3.65873	58.6547	9.29293	4.40375	1.04159	1227.14	194.421	92.1325	21.7914	57.6131	0.982242
St. Mary's County, Maryland	24037	4	105151	16.1558	9.66481	2.68635	0.15602	6.74214	2.62006	0.905782	0.0920196	109.402	6.54409	3.12158	0.682546	102.66	3.92404	2.21579	0.590526	118.815	13.5888	4.90215	0.746546	1129.95	129.232	46.6201	7.09975	118.069	0.993717
Somerset County, Maryland	24039	3	26470	59.8431	4.56619	2.28636	0.347889	57.1489	2.585	1.935	0.347889	34.7921	7.42157	5.71067	1.63586	-22.3568	4.83657	3.77567	1.28797	37.4864	9.40276	6.06203	1.63586	1416.18	355.223	229.015	61.8006	35.8505	0.956361
Talbot County, Maryland	24041	5	37782	4009.45	8.22918	4.47559	1.48641	4005.28	5.18314	3.93314	1.48641	49.6606	10.5932	8.15114	2.33495	-3955.62	5.41005	4.218	0.848537	53.8332	13.6392	8.69358	2.33495	1424.84	360.998	230.099	61.8006	51.4983	0.956626
Washington County, Maryland	24043	3	147430	42.3413	27.3888	13.6078	1.23752	26.231	15.6283	11.5135	1.23752	87.4319	41.3572	31.828	9.13256	61.2009	25.729	20.3146	7.89505	103.542	53.1178	33.9224	9.13256	702.314	360.291	230.091	61.9451	94.4096	0.911799
Wicomico County, Maryland	24045	3	98733	820.544	23.1196	13.3295	3.73561	809.394	14.98	11.88	3.73561	129.774	27.6824	21.3008	6.10176	-679.619	12.7025	9.4208	2.36614	140.925	35.822	22.7503	6.10176	1427.33	362.817	230.422	61.8006	134.823	0.956702
Worcester County, Maryland	24047	3	51454	170.902	20.2404	10.6658	2.83596	158.287	10.5108	8.98579	2.83596	67.631	14.4265	11.1008	3.17989	-90.6559	3.91572	2.11497	0.343923	80.2457	24.1561	12.7807	3.17989	1559.56	469.47	248.391	61.8006	77.0658	0.960373
Baltimore city, Maryland	24510	1	620961	60.1028	43.8751	7.81337	0	0	0	0	0	685.574	61.9877	37.7807	12.4404	685.574	61.9877	37.7807	12.4404	745.677	105.863	45.5941	12.4404	1200.84	170.482	73.4251	20.034	733.237	0.983317
Barnstable County, Massachusetts	25001	4	215888	69.232	46.1789	26.8994	6.90605	48.8385	31.2916	24.2483	6.90605	111.105	30.8733	21.6308	4.24217	62.2664	-0.418342	-2.61746	-2.66389	131.498	45.7605	24.282	4.24217	609.105	211.964	112.475	19.6498	127.256	0.96774
Berkshire County, Massachusetts	25003	4	131219	123.797	18.0462	4.90071	0.34039	112.274	9.63427	3.40269	0.34039	67.5307	18.7651	13.1474	2.57843	-44.7432	9.13082	9.74473	2.23804	79.0539	27.177	14.6454	2.57843	602.458	207.112	111.611	19.6498	76.4754	0.967384
Bristol County, Massachusetts	25005	2	548285	245	50.5841	19.316	4.42359	198.258	16.4624	13.2395	4.42359	250.17	54.3382	39.2554	13.4098	51.9121	37.8757	26.016	8.98624	296.912	88.4599	45.3319	13.4098	541.529	161.339	82.6795	24.4578	283.502	0.954836
Dukes County, Massachusetts	25007	5	16535	4.53381	2.38863	0.818301	0.128805	3.12454	1.35986	0.635095	0.128805	8.50959	2.3646	1.65672	0.32491	5.38506	1.00474	1.02162	0.196105	9.91887	3.39337	1.83992	0.32491	599.871	205.223	111.274	19.6498	9.59396	0.967243
Essex County, Massachusetts	25009	2	743159	167.774	71.0621	17.6652	1.12479	106.304	26.1885	9.67397	1.12479	339.09	73.6521	53.2084	18.1762	232.787	47.4636	43.5344	17.0514	400.561	118.526	61.1996	18.1762	538.998	159.489	82.3506	24.458	382.385	0.954623
Franklin County, Massachusetts	25011	5	71372	67.2238	57.0366	50.0691	5.11665	60.2049	51.592	48.1229	4.677	36.731	10.2066	7.15109	1.40245	-23.4739	-41.3854	-40.9718	-3.27455	43.7499	15.6512	9.09731	1.8421	612.984	219.291	127.463	25.8098	41.9078	0.957895
Hampden County, Massachusetts	25013	3	463490	725.47	49.8607	12.4645	1.05539	678.493	15.0789	4.78277	0.385694	238.531	66.2818	46.4392	9.10751	-439.962	51.2029	41.6564	8.72181	285.508	101.064	54.1209	9.77721	615.996	218.049	116.768	21.0947	275.731	0.965755
Hampshire County, Massachusetts	25015	3	158080	41.9013	29.24	17.2466	1.67519	26.8687	17.9939	14.4148	1.302	81.3545	22.6064	15.8388	3.10625	54.4858	4.61249	1.42394	1.80425	96.3871	33.8525	18.6705	3.47944	609.736	214.148	118.108	22.0106	92.9077	0.963901
Middlesex County, Massachusetts	25017	2	1503085	142.876	101.55	23.6898	2.18495	19.3679	11.3888	7.63374	2.18495	685.82	148.963	107.615	36.7619	666.452	137.575	99.9818	34.577	809.328	239.124	123.672	36.7619	538.445	159.089	82.2785	24.4576	772.566	0.954577
Nantucket County, Massachusetts	25019	6	10172	7.22411	5.05588	3.82635	1.28345	2.54023	0.700286	0.200286	0.000285596	5.23493	1.45466	1.01918	0.199878	2.6947	0.75437	0.818893	0.199593	9.91881	5.81025	4.64525	1.48304	975.109	571.2	456.67	145.796	8.43577	0.850482
Norfolk County, Massachusetts	25021	2	670850	197.593	46.9728	11.4486	1.38849	140.488	5.28644	4.02503	1.38849	306.094	66.485	48.0307	16.4075	165.606	61.1986	44.0057	15.019	363.198	108.171	55.4543	16.4075	541.4	161.245	82.6628	24.4578	346.791	0.954825
Plymouth County, Massachusetts	25023	2	494919	250.76	194.019	152.732	51.2835	207.79	162.651	147.146	51.2835	225.82	49.0493	35.4346	12.1046	18.0306	-113.602	-111.711	-39.1789	268.791	80.4174	41.0207	12.1046	543.1	162.486	82.8837	24.4578	256.686	0.954966
Suffolk County, Massachusetts	25025	1	722023	91.5486	64.8426	11.6835	0.0628285	2.90033	0.084659	0.0150226	0.00148215	329.443	71.5566	51.6945	17.6591	326.543	71.4719	51.6795	17.6576	418.091	136.315	63.3631	17.7204	579.055	188.795	87.7577	24.5427	400.371	0.957616
Worcester County, Massachusetts	25027	3	798552	413.165	170.787	47.9127	1.83963	348.82	123.816	39.5479	1.83963	364.361	79.141	57.1738	19.5308	15.5412	-44.6748	17.6259	17.6912	428.706	126.113	65.5386	19.5308	536.854	157.927	82.0718	24.4578	409.175	0.954442
Alcona County, Michigan	26001	6	10942	12.1481	8.12294	7.02697	1.00522	10.8632	7.18492	6.85992	1.00522	14.131	2.07687	1.45965	0.367845	3.26784	-5.10806	-5.40028	-0.637374	15.416	3.01488	1.62669	0.367845	1408.88	275.533	148.665	33.6177	15.0481	0.976139
Alger County, Michigan	26003	6	9601	8.43152	3.39927	0.935939	0.0142244	7.34	2.595	0.77	0.004	10.6642	1.83811	1.29653	0.338536	3.32423	-0.756892	0.526531	0.334536	11.7558	2.64238	1.46247	0.348761	1224.43	275.219	152.325	36.3255	11.407	0.970333
Allegan County, Michigan	26005	5	111408	53.4283	28.846	16.6997	4.34324	40.786	19.6171	15.0562	4.34324	140.893	16.4675	9.19037	2.45959	100.107	-3.14963	-5.86585	-1.88365	153.535	25.6964	10.8339	2.45959	1378.13	230.651	97.245	22.0773	151.075	0.98398
Alpena County, Michigan	26007	5	29598	11.7059	5.94936	1.61731	0.0690098	8.68007	3.74047	1.22395	0.0690098	38.2242	5.6179	3.94833	0.995016	29.5442	1.87743	2.72437	0.926007	41.2501	7.82678	4.34169	0.995016	1393.68	264.436	146.689	33.6177	40.2551	0.975878
Antrim County, Michigan	26009	6	23580	82.8302	80.5463	78.3265	9.85149	80.1636	78.5997	77.9798	9.85149	30.4523	4.47564	3.14553	0.792705	-49.7113	-74.1241	-74.8343	-9.05879	33.1189	6.42228	3.4922	0.792705	1404.54	272.361	148.1	33.6177	32.3262	0.976065
Arenac County, Michigan	26011	6	15899	85.2353	30.7001	8.88875	0.0834586	83.5496	29.4696	8.66962	0.0834586	20.5327	3.01774	2.1209	0.534488	-63.0169	-26.4519	-6.54872	0.451029	22.2184	4.24826	2.34003	0.534488	1397.47	267.203	147.181	33.6177	21.6839	0.975944
Baraga County, Michigan	26013	6	8860	3.66914	2.37756	1.39267	0.112359	2.61906	1.611	1.25616	0.112359	9.84117	1.69624	1.19647	0.312408	7.22211	0.0852422	-0.0596958	0.200049	10.8913	2.4628	1.33298	0.312408	1229.26	277.969	150.449	35.2605	10.5788	0.971316
Barry County, Michigan	26015	2	59173	16.4587	10.4137	4.63707	0.965747	9.85427	5.59251	3.7785	0.965747	74.8333	8.74651	4.88135	1.30638	64.9791	3.15399	1.10285	0.340634	81.4377	13.5677	5.73993	1.30638	1376.27	229.289	97.0025	22.0773	80.1314	0.983959
Bay County, Michigan	26017	4	107771	546.277	12.2407	3.96645	0.683195	535.404	4.30286	2.55286	0.683195	139.18	20.4557	14.3765	3.62301	-396.223	16.1528	11.8236	2.93982	150.054	28.3935	15.7901	3.62301	1392.34	263.462	146.515	33.6177	146.431	0.975855
Benzie County, Michigan	26019	5	17525	5.09992	2.92639	1.07115	0.197264	3.08267	1.4538	0.808905	0.197264	22.6326	3.32636	2.33781	0.58915	19.5499	1.87256	1.5289	0.391886	24.6498	4.79895	2.60005	0.58915	1406.55	273.835	148.362	33.6177	24.0607	0.976099
Berrien County, Michigan	26021	4	156813	1773.87	32.1813	17.2975	5.019	1758.01	20.6023	15.2355	5.019	380.335	29.8153	20.9698	5.32285	-1377.68	9.21298	5.73423	0.30385	396.197	41.3943	23.0318	5.32285	2526.56	263.972	146.874	33.9439	390.874	0.986565
Branch County, Michigan	26023	5	45248	21.2234	16.6093	12.2938	3.98228	16.1388	12.8976	11.6328	3.98228	58.4354	8.58837	6.03601	1.52113	42.2965	-4.30925	-5.59681	-2.46115	63.5199	12.3001	6.697	1.52113	1403.82	271.837	148.007	33.6177	61.9988	0.976053
Calhoun County, Michigan	26025	4	136146	45.67	24.6814	9.19347	1.31248	31.0795	14.0303	7.29671	1.31248	175.825	25.8414	18.1617	4.57691	144.746	11.8111	10.865	3.26443	190.416	36.4925	20.0584	4.57691	1398.61	268.039	147.33	33.6177	185.839	0.975964
Cass County, Michigan	26027	3	52293	35.8262	29.5657	23.8563	8.07993	29.6915	25.0874	23.0588	8.07993	126.832	9.94262	6.99286	1.77503	97.1402	-15.1447	-16.066	-6.3049	132.966	14.4209	7.79037	1.77503	2542.72	275.771	148.975	33.9439	131.191	0.986651
Charlevoix County, Michigan	26029	6	25949	30.9394	13.1423	3.91183	0.261612	27.9135	10.9334	3.51847	0.261612	33.5117	4.92529	3.46156	0.872345	5.59825	-6.00814	-0.0569156	0.610734	36.5376	7.13418	3.85492	0.872345	1408.05	274.931	148.557	33.6177	35.6653	0.976125
Cheboygan County, Michigan	26031	6	26152	12.9178	10.0198	7.44425	2.17411	4.37908	2.28689	1.50194	0.119006	33.7713	4.96345	3.48837	0.879102	29.3922	2.67656	1.98643	0.760096	42.3101	12.6964	9.43068	2.93421	1617.85	485.485	360.61	112.198	39.3759	0.93065
Chippewa County, Michigan	26033	5	38520	51.8864	10.2874	6.40409	0.605023	47.4927	7.01655	5.62856	0.518115	49.7465	7.31136	5.13851	1.29495	2.25378	0.294804	-0.490052	0.776838	54.1402	10.5822	5.91404	1.38186	1405.51	274.719	153.532	35.8738	52.7584	0.974476
Clare County, Michigan	26035	6	30926	8.28212	4.67378	1.34262	0.103795	4.66215	2.0312	0.87202	0.103795	39.9393	5.86996	4.12548	1.03966	35.2771	3.83876	3.25346	0.935865	43.5592	8.51254	4.59608	1.03966	1408.5	275.255	148.615	33.6177	42.5196	0.976132
Clinton County, Michigan	26037	3	75382	20.5132	12.9393	5.06357	0.79381	11.6981	6.50432	3.91762	0.79381	97.3518	14.308	10.0558	2.53417	85.6537	7.80369	6.13822	1.74036	106.167	20.743	11.2018	2.53417	1408.38	275.172	148.6	33.6177	103.633	0.97613
Crawford County, Michigan	26039	6	14074	4.13434	2.26414	0.735917	0.112468	2.2	0.77	0.22	0	18.1758	2.67134	1.87745	0.473135	15.9758	1.90134	1.65745	0.473135	20.1102	4.16548	2.39337	0.585604	1428.89	295.97	170.056	41.6089	19.5246	0.97088
Delta County, Michigan	26041	5	37069	61.3849	22.9411	6.43335	0.0834215	57.3366	19.9859	5.90707	0.0834215	41.1741	7.09684	5.00584	1.30707	-16.1625	-12.889	-0.901228	1.22365	45.2224	10.0521	5.53212	1.30707	1219.95	271.173	149.239	35.2605	43.9153	0.971097
Dickinson County, Michigan	26043	5	26168	41.1746	15.0487	5.8258	0.315946	38.3974	13.0142	5.46422	0.315946	29.0659	5.00985	3.53376	0.922698	-9.33149	-8.00437	-1.93046	0.606751	31.8431	7.04437	3.89534	0.922698	1216.87	269.198	148.859	35.2605	30.9204	0.971024
Eaton County, Michigan	26045	3	107759	109.934	11.0877	2.55963	0.115487	98.3832	2.59219	0.853679	0.0285791	139.17	20.4541	14.3754	3.62274	40.787	17.862	13.5217	3.59416	150.721	28.9496	16.0814	3.70965	1398.69	268.652	149.235	34.4254	147.011	0.975387
Emmet County, Michigan	26047	6	32694	10.5812	6.45139	3.0016	0.420514	6.9889	3.82897	2.53459	0.420514	42.2226	6.20554	4.36133	1.0991	35.2336	2.37657	1.82674	0.678582	45.8149	8.82795	4.82833	1.0991	1401.32	270.018	147.683	33.6177	44.7158	0.97601
Genesee County, Michigan	26049	3	425790	58.7277	38.3244	7.90727	0.23995	13.1324	5.03984	1.97989	0.23995	512.926	43.5622	19.5065	5.66125	499.794	38.5223	17.5266	5.4213	558.521	76.8467	25.4339	5.66125	1311.73	180.48	59.7334	13.2959	552.86	0.989864
Gladwin County, Michigan	26051	6	25692	5.70442	3.21788	0.792154	0.0222244	2.76145	1.06952	0.409568	0.0222244	33.1798	4.87651	3.42727	0.863706	30.4184	3.807	3.0177	0.841481	36.1228	7.02488	3.80986	0.863706	1405.99	273.427	148.29	33.6177	35.2591	0.97609
Gogebic County, Michigan	26053	6	16427	3.17694	2.33397	1.2968	0.104	1.74	1.285	1.11	0.104	18.2462	3.14494	2.21832	0.579225	16.5062	1.85994	1.10832	0.475225	19.6831	4.19391	2.40513	0.579225	1198.22	255.306	146.413	35.2605	19.1039	0.970572
Grand Traverse County, Michigan	26055	5	86986	25.2792	13.4536	3.85707	0.404751	15.2344	6.12089	2.55125	0.404751	112.338	16.5105	11.6038	2.92427	97.1033	10.3896	9.05255	2.51952	122.383	23.8432	12.9096	2.92427	1406.92	274.104	148.41	33.6177	119.458	0.976106
Gratiot County, Michigan	26057	5	42476	43.3041	10.834	7.14107	1.71939	38.4821	7.31394	6.5142	1.71939	54.8555	8.06223	5.66623	1.42794	16.3734	0.748291	-0.847973	-0.291449	59.6775	11.5823	6.2931	1.42794	1404.97	272.679	148.157	33.6177	58.2496	0.976072
Hillsdale County, Michigan	26059	5	46688	57.5992	9.48454	4.04943	0.784197	52.2936	5.61143	3.3597	0.784197	60.295	8.8617	6.2281	1.56954	8.00146	3.25026	2.86841	0.785346	65.6007	12.7348	6.91784	1.56954	1405.09	272.764	148.172	33.6177	64.0311	0.976074
Houghton County, Michigan	26061	5	36628	6.46449	3.8482	0.855692	0.028561	2.60962	1.03415	0.354559	0.028561	40.6843	7.01242	4.94629	1.29152	38.0746	5.97827	4.59173	1.26296	44.5391	9.82647	5.44742	1.29152	1215.99	268.277	148.723	35.2605	43.2476	0.971003
Huron County, Michigan	26063	6	33118	27.5087	8.53033	5.19686	1.04376	24.0269	5.98861	4.74422	1.04376	42.7701	6.28602	4.41789	1.11335	18.7433	0.29741	-0.326333	0.0695941	46.2519	8.82774	4.87052	1.11335	1396.58	266.554	147.066	33.6177	45.1386	0.975929
Ingham County, Michigan	26065	3	280895	208.076	33.8285	8.4503	0.493859	178.453	12.2036	4.5993	0.493859	362.756	53.315	37.4704	9.44291	184.303	41.1114	32.8711	8.94905	392.379	74.9399	41.3214	9.44291	1396.89	266.79	147.106	33.6172	382.936	0.975934
Ionia County, Michigan	26067	5	63905	18.7207	10.7932	4.61907	0.641534	11.7294	5.68953	3.7102	0.641534	80.8177	9.44595	5.27171	1.41085	69.0883	3.75642	1.56151	0.769317	87.8089	14.5496	6.18058	1.41085	1374.05	227.675	96.7151	22.0773	86.3981	0.983933
Iosco County, Michigan	26069	6	25887	17.7783	5.17466	2.93235	0.409039	14.3379	2.49158	1.93216	0.173878	33.4317	4.91353	3.45328	0.870261	19.0937	2.42194	1.52113	0.696383	36.872	7.5966	4.45348	1.10542	1424.35	293.452	172.035	42.7018	35.7666	0.97002
Iron County, Michigan	26071	6	11817	4.13055	1.35713	0.491264	0.108365	2.83178	0.396456	0.321456	0.108365	13.1256	2.26236	1.59578	0.416674	10.2939	1.8659	1.27433	0.308309	14.4244	3.22304	1.76559	0.416674	1220.65	272.746	149.411	35.2605	14.0077	0.971113
Isabella County, Michigan	26073	5	70311	14.9065	10.4072	4.7038	1.07644	7.3073	4.85975	3.7159	1.07644	90.8029	13.3455	9.37938	2.36369	83.4956	8.48575	5.66347	1.28725	98.4021	18.8929	10.3673	2.36369	1399.53	268.705	147.449	33.6177	96.0384	0.975979
Jackson County, Michigan	26075	4	160248	37.207	22.4137	7.95453	1.41604	19.6045	9.5639	5.66621	1.41604	206.952	30.4161	21.3768	5.38717	187.347	20.8522	15.7106	3.97113	224.554	43.266	23.6652	5.38717	1401.29	269.994	147.678	33.6177	219.167	0.97601
Kalamazoo County, Michigan	26077	3	250331	76.656	46.4985	27.6438	7.32295	63.5163	36.9065	25.9357	7.32295	607.154	47.5962	33.4754	8.49721	543.638	10.6896	7.53974	1.17427	620.294	57.1882	35.1836	8.49721	2477.89	228.45	140.548	33.9439	611.797	0.986301
Kalkaska County, Michigan	26079	5	17153	12.7673	4.55153	2.82447	0.571618	10.7639	3.08903	2.56403	0.571618	22.1522	3.25576	2.28818	0.576644	11.3883	0.166727	-0.275845	0.00502632	24.1556	4.71826	2.54863	0.576644	1408.24	275.069	148.582	33.6177	23.579	0.976128
Kent County, Michigan	26081	1	602622	91.5655	61.2734	16.5648	2.04853	26.7926	13.9891	8.14433	2.04853	762.108	89.075	49.7121	13.3043	735.315	75.0859	41.5677	11.2557	826.881	136.359	58.1325	13.3043	1372.14	226.277	96.466	22.0773	813.577	0.98391
Keweenaw County, Michigan	26083	5	2156	0.476335	0.275455	0.0679441	0.0051122	0.2	0.07	0.02	0	2.39476	0.412766	0.291149	0.0760218	2.19476	0.342766	0.271149	0.0760218	2.67109	0.618221	0.339093	0.081134	1238.91	286.744	157.279	37.6317	2.58996	0.969625
Lake County, Michigan	26085	6	11539	4.01694	2.67262	1.47691	0.133561	2.58	1.605	1.23	0.108	14.902	2.19018	1.53928	0.387915	12.322	0.58518	0.309284	0.279915	16.3389	3.2578	1.78619	0.413476	1415.98	282.33	154.796	35.8329	15.9255	0.974694
Lapeer County, Michigan	26087	2	88319	18.9716	11.9054	3.37826	0.375517	8.80251	4.48196	2.05627	0.375517	106.389	9.03552	4.04597	1.17424	97.5869	4.55356	1.9897	0.79872	116.559	16.459	5.36796	1.17424	1319.75	186.358	60.7792	13.2954	115.384	0.989926
Leelanau County, Michigan	26089	5	21708	7.03044	4.65312	2.15291	0.545893	4.502	2.80736	1.82422	0.545893	28.0347	4.12032	2.89581	0.729773	23.5327	1.31296	1.0716	0.18388	30.5632	5.96608	3.22451	0.729773	1407.92	274.833	148.54	33.6177	29.8334	0.976122
Lenawee County, Michigan	26091	5	99892	24.1748	14.479	5.02828	0.766483	13.3287	6.56136	3.61828	0.766483	129.005	18.9602	13.3254	3.35814	115.676	12.3988	9.70715	2.59165	139.851	26.8779	14.7354	3.35814	1400.03	269.069	147.514	33.6177	136.493	0.975988
Livingston County, Michigan	26093	2	180967	43.3229	24.6998	6.75428	0.671257	22.8741	9.77215	4.09594	0.671257	218.001	18.5146	8.29055	2.40611	195.127	8.74241	4.1946	1.73486	238.45	33.4422	10.9489	2.40611	1317.64	184.797	60.5021	13.2959	236.044	0.989909
Luce County, Michigan	26095	6	6631	2.33293	1.52517	0.834401	0.24028	1.53156	0.929394	0.729394	0.24028	8.56358	1.25861	0.884565	0.222919	7.03202	0.329214	0.155171	-0.0173612	9.36495	1.85439	0.989572	0.222919	1412.3	279.654	149.234	33.6177	9.14203	0.976196
Mackinac County, Michigan	26097	6	11113	14.8614	7.13307	2.73157	0.166122	13.4382	6.05689	2.42635	0.115	14.3518	2.10932	1.48246	0.373593	0.913606	-3.94756	-0.943897	0.258593	15.775	3.18551	1.78767	0.424715	1419.51	286.647	160.863	38.2179	15.3503	0.973077
Macomb County, Michigan	26099	2	840978	99.4686	71.4681	14.822	0.829871	6.84109	3.85007	2.78044	0.829871	1013.09	86.0406	38.5277	11.1816	1006.25	82.1905	35.7473	10.3518	1105.72	153.659	50.5693	11.1816	1314.8	182.714	60.1315	13.296	1094.54	0.989887
Manistee County, Michigan	26101	6	24733	66.6793	28.6903	7.59517	0.439133	63.8469	26.6226	7.22695	0.439133	31.9413	4.69449	3.29934	0.831466	-31.9056	-21.9281	-3.92761	0.392333	34.7738	6.76217	3.66756	0.831466	1405.97	273.407	148.286	33.6177	33.9423	0.976089
Marquette County, Michigan	26103	5	67077	227.733	71.3242	13.7893	0.403578	197.495	46.1934	9.35334	0.285997	74.5052	12.8419	9.05816	2.36517	-122.99	-33.3515	-0.295179	2.07917	104.743	37.9727	13.4941	2.48275	1561.53	566.106	201.173	37.0135	102.26	0.976297
Mason County, Michigan	26105	5	28705	36.0228	13.85	4.7356	0.482334	32.6239	11.3687	4.29374	0.482334	37.071	5.4484	3.8292	0.964996	4.4471	-5.92034	-0.464542	0.482662	40.4699	7.92961	4.27106	0.964996	1409.85	276.245	148.792	33.6177	39.5049	0.976155
Mecosta County, Michigan	26107	5	42798	27.7767	19.7284	15.394	3.20801	22.8856	16.1579	14.7582	3.20801	55.2713	8.12335	5.70919	1.43877	32.3858	-8.03455	-9.04897	-1.76924	60.1625	11.6939	6.34503	1.43877	1405.73	273.234	148.255	33.6177	58.7237	0.976085
Menominee County, Michigan	26109	5	24029	12.4804	5.37166	2.41173	0.16583	9.81376	3.41424	2.06424	0.16583	26.69	4.60034	3.24491	0.847275	16.8763	1.1861	1.18067	0.681446	29.3566	6.55776	3.5924	0.847275	1221.72	272.91	149.503	35.2605	28.5094	0.971139
Midland County, Michigan	26111	4	83629	13.9806	9.48494	2.47495	0.252049	3.35557	1.72864	1.09369	0.252049	108.002	15.8733	11.156	2.81141	104.647	14.1447	10.0623	2.55936	118.627	23.6297	12.5372	2.81141	1418.5	282.553	149.915	33.6177	115.816	0.9763
Missaukee County, Michigan	26113	5	14849	6.04564	4.30978	2.64267	0.637566	4.29092	3.02884	2.41456	0.637566	19.1767	2.81844	1.98083	0.499189	14.8858	-0.210398	-0.433726	-0.138377	20.9314	4.09938	2.20895	0.499189	1409.62	276.071	148.761	33.6177	20.4322	0.976151
Monroe County, Michigan	26115	4	152021	3005.78	29.6745	9.89431	1.7378	2986.33	15.4731	7.36529	1.7378	183.131	15.5531	6.96446	2.02125	-2803.2	0.0800483	-0.400833	0.28345	202.585	29.7545	9.49348	2.02125	1332.61	195.726	62.4484	13.2959	200.564	0.990023
Montcalm County, Michigan	26117	2	63342	47.5381	39.5436	33.0073	11.3897	40.2428	34.2181	32.0589	11.3897	81.8028	12.0227	8.44972	2.12941	41.56	-22.1954	-23.6092	-9.26029	89.0981	17.3483	9.39811	2.12941	1406.62	273.883	148.371	33.6177	86.9686	0.9761
Montmorency County, Michigan	26119	6	9765	2.54931	1.51514	0.513933	0.080683	1.18145	0.460647	0.155803	0.004	12.611	1.85346	1.30264	0.328277	11.4295	1.39282	1.14683	0.324277	13.9788	2.90796	1.66077	0.40496	1431.52	297.794	170.073	41.4705	13.5739	0.971031
Muskegon County, Michigan	26121	4	172188	265.764	29.7539	9.56368	1.19095	248.037	16.8132	7.25918	1.19095	217.758	25.4515	14.2043	3.80145	-30.2793	8.63828	6.94511	2.6105	235.485	38.3922	16.5088	3.80145	1367.6	222.966	95.8765	22.0773	231.684	0.983857
Newaygo County, Michigan	26123	6	48460	31.4297	10.1871	5.06024	1.05603	25.6681	5.98113	4.31124	1.05603	61.2851	7.16299	3.99761	1.06987	35.617	1.18186	-0.313629	0.0138414	67.0467	11.3689	4.74661	1.06987	1383.55	234.605	97.9491	22.0773	65.9768	0.984043
Oakland County, Michigan	26125	2	1202362	162.639	110.987	28.3042	2.80572	32.4712	14.081	5.31207	0.224057	1448.42	123.012	55.0832	15.9864	1415.95	108.931	49.7711	15.7624	1578.59	219.919	78.0754	18.5681	1312.91	182.906	64.935	15.443	1560.02	0.988238
Oceana County, Michigan	26127	6	26570	11.4439	7.62376	4.62342	1.29771	8.37655	5.38462	4.22467	1.29771	34.3137	5.04317	3.5444	0.893222	25.9372	-0.341454	-0.680276	-0.404491	37.3811	7.28231	3.94315	0.893222	1406.89	274.08	148.406	33.6177	36.4878	0.976105
Ogemaw County, Michigan	26129	6	21699	6.76587	4.2877	1.89832	0.185795	4.0025	2.21075	1.34675	0.104	28.0231	4.11862	2.89461	0.72947	24.0206	1.90786	1.54786	0.62547	30.7865	6.19556	3.44618	0.811265	1418.8	285.523	158.817	37.3872	29.9752	0.973649
Ontonagon County, Michigan	26131	6	6780	3.08508	0.793162	0.195369	0.00676412	2.38043	0.278764	0.103764	0.00676412	7.53083	1.29803	0.91558	0.239066	5.1504	1.01926	0.811816	0.232302	8.23548	1.81243	1.00719	0.239066	1214.67	267.319	148.552	35.2605	7.99642	0.970971
Osceola County, Michigan	26133	6	23528	12.076	5.39119	1.78119	0.18444	9.39559	3.43446	1.43274	0.18444	30.3851	4.46577	3.1386	0.790957	20.9896	1.03131	1.70586	0.606517	33.0656	6.4225	3.48706	0.790957	1405.37	272.973	148.209	33.6177	32.2746	0.976079
Oscoda County, Michigan	26135	6	8640	4.18805	1.72536	0.863681	0.216732	2.62676	0.432662	0.167869	0.00713197	11.1581	1.63993	1.15256	0.290457	8.53134	1.20727	0.984693	0.283325	12.7194	2.93263	1.84837	0.500057	1472.15	339.424	213.932	57.877	12.2193	0.960685
Otsego County, Michigan	26137	6	24164	10.3001	5.15957	2.63511	0.708667	7.46764	3.0919	2.2669	0.708667	31.2065	4.58649	3.22344	0.812338	23.7389	1.49459	0.956543	0.103671	34.0389	6.65417	3.59166	0.812338	1408.66	275.375	148.637	33.6177	33.2266	0.976135
Ottawa County, Michigan	26139	2	263801	1560.69	86.2721	32.832	5.14056	1532.51	65.7063	29.1696	5.14056	333.617	38.9931	21.7617	5.82402	-1198.9	-26.7132	-7.4079	0.683462	361.789	59.5589	25.4241	5.82402	1371.45	225.772	96.3761	22.0773	355.965	0.983902
Presque Isle County, Michigan	26141	6	13376	33.6666	13.0607	3.83358	0.132693	32.1744	11.9714	3.6396	0.132693	17.2744	2.53885	1.78434	0.44967	-14.9	-9.43256	-1.85526	0.316977	18.7666	3.62818	1.97833	0.44967	1403.01	271.245	147.901	33.6177	18.3169	0.976039
Roscommon County, Michigan	26143	6	24449	6.50289	3.82611	1.01878	0.107356	3.58758	1.69794	0.639791	0.107356	31.5746	4.64058	3.26146	0.821919	27.987	2.94265	2.62167	0.714563	34.4899	6.76876	3.64045	0.821919	1410.69	276.852	148.9	33.6177	33.668	0.976169
Saginaw County, Michigan	26145	4	200169	32.2306	20.3752	5.85472	0.777605	12.1549	5.71988	3.24488	0.777605	258.508	37.9934	26.7022	6.72922	246.353	32.2735	23.4573	5.95161	278.583	52.6487	29.3121	6.72922	1391.74	263.021	146.437	33.6177	271.854	0.975845
St. Clair County, Michigan	26147	2	163040	2001.62	39.1358	10.522	0.448574	1983.07	25.3495	7.3304	0.157515	196.405	16.6805	7.46927	2.16776	-1786.66	-8.66905	0.138867	2.01024	214.959	30.4668	10.6609	2.45882	1318.45	186.867	65.3882	15.0811	212.5	0.988561
St. Joseph County, Michigan	26149	5	61295	54.1518	43.6877	36.8506	12.7828	47.0345	38.376	35.5513	12.7398	148.665	11.6542	8.19665	2.08059	101.631	-26.7218	-27.3546	-10.6592	155.783	16.9659	9.496	2.12359	2541.52	276.792	154.923	34.6454	153.659	0.986368
Sanilac County, Michigan	26151	6	43114	12.0359	7.67971	3.39392	0.517683	7.04803	4.03858	2.7455	0.517683	55.6794	8.18333	5.75134	1.44939	48.6314	4.14474	3.00583	0.93171	60.6673	11.8245	6.39976	1.44939	1407.14	274.26	148.438	33.6177	59.2179	0.976109
Schoolcraft County, Michigan	26153	6	8485	11.2967	6.28535	3.27042	0.269134	10.4401	5.66001	3.15906	0.269134	10.9579	1.61051	1.13189	0.285246	0.517868	-4.0495	-2.02717	0.0161122	11.8146	2.23586	1.24325	0.285246	1392.41	263.507	146.523	33.6177	11.5293	0.975856
Shiawassee County, Michigan	26155	5	70648	15.2022	9.06865	2.48174	0.190366	7.47862	3.43045	1.47768	0.190366	91.2381	13.4095	9.42433	2.37502	83.7595	9.97902	7.94665	2.18466	98.9617	19.0477	10.4284	2.37502	1400.77	269.614	147.611	33.6177	96.5866	0.976001
Tuscola County, Michigan	26157	6	55729	17.2879	11.0585	5.31002	1.28017	10.946	6.42887	4.48557	1.28017	71.971	10.5777	7.43416	1.87348	61.025	4.14887	2.94859	0.593309	78.313	15.2074	8.25861	1.87348	1405.25	272.881	148.192	33.6177	76.4395	0.976077
Van Buren County, Michigan	26159	3	76258	44.0425	34.2709	26.2527	8.75207	35.5867	28.0981	25.1535	8.75207	184.957	14.4992	10.1976	2.58849	149.37	-13.599	-14.9559	-6.16358	193.412	20.6719	11.2968	2.58849	2536.29	271.079	148.14	33.9439	190.824	0.986617
Washtenaw County, Michigan	26161	3	344791	59.5378	40.1484	13.2028	1.39466	21.4727	12.3609	8.2543	1.39466	415.351	35.2752	15.7957	4.58429	393.878	22.9144	7.54143	3.18964	453.416	63.0628	20.7442	4.58429	1315.05	182.901	60.1646	13.2959	448.832	0.989889
Wayne County, Michigan	26163	1	1820584	2043.93	507.371	128.853	0.48559	1829.34	350.722	100.956	0.48559	2193.15	186.261	83.405	24.2061	363.804	-164.461	-17.5512	23.7205	2407.74	342.91	111.301	24.2061	1322.51	188.352	61.135	13.2958	2383.53	0.989947
Wexford County, Michigan	26165	5	32735	18.37	7.57905	3.36258	0.783508	14.7638	4.94653	2.89377	0.783508	42.2755	6.21332	4.3668	1.10047	27.5117	1.2668	1.47302	0.316967	45.8817	8.84584	4.8356	1.10047	1401.61	270.226	147.72	33.6177	44.7812	0.976015
Aitkin County, Minnesota	27001	6	16202	6.04938	4.66333	3.31839	1.01977	4.59862	3.60427	3.12979	1.01977	10.9249	3.51701	2.64457	0.898506	6.3263	-0.0872634	-0.485224	-0.121261	12.3757	4.57606	2.83317	0.898506	763.836	282.438	174.865	55.4565	11.4772	0.927397
Anoka County, Minnesota	27003	2	330844	180.852	79.3866	24.0609	2.00565	148.245	55.4897	19.8147	2.00565	214.02	69.5808	53.3799	21.7421	65.7753	14.0911	33.5652	19.7365	246.628	93.4777	57.626	21.7421	745.45	282.543	174.179	65.7171	224.885	0.911842
Becker County, Minnesota	27005	6	32504	13.9655	10.846	7.5969	2.3093	11.0778	8.73801	7.2215	2.3093	11.4562	7.08128	5.33101	1.82811	0.378461	-1.65674	-1.89049	-0.481196	14.3439	9.1893	5.70641	1.82811	441.297	282.713	175.56	56.2425	12.5158	0.872552
Beltrami County, Minnesota	27007	5	44442	12.0712	8.1694	4.84793	1.45157	8.28543	5.40578	4.35578	1.45157	15.6638	9.68207	7.28897	2.49953	7.3784	4.2763	2.93319	1.04796	19.4496	12.4457	7.78112	2.49953	437.64	280.044	175.085	56.2425	16.9501	0.871487
Benton County, Minnesota	27009	4	38451	32.1801	20.4511	14.3945	4.28795	28.9608	18.101	13.976	4.28795	24.8736	8.08675	6.20386	2.52689	-4.08721	-10.0142	-7.77212	-1.76107	28.0929	10.4368	6.62237	2.52689	730.616	271.432	172.229	65.7171	25.566	0.910053
Big Stone County, Minnesota	27011	6	5269	2.06297	1.56852	1.1864	0.309059	1.6761	1.2861	1.1361	0.309059	3.55286	1.14376	0.860032	0.2922	1.87675	-0.142349	-0.276073	-0.0168584	3.93973	1.42617	0.910325	0.2922	747.718	270.672	172.77	55.4565	3.64753	0.925832
Blue Earth County, Minnesota	27013	4	64013	20.3275	10.9534	4.54275	0.369557	15.0495	7.10046	3.85661	0.369557	37.6996	13.9329	10.486	3.58741	22.6501	6.83248	6.62938	3.21785	42.9776	17.7859	11.1721	3.58741	671.389	277.848	174.529	56.0419	39.3902	0.916528
Brown County, Minnesota	27015	5	25893	6.08271	5.10684	3.57904	0.707184	4.05163	3.62415	3.31499	0.707184	15.2493	5.63582	4.24154	1.45109	11.1977	2.01167	0.926544	0.743908	17.2804	7.11851	4.50558	1.45109	667.378	274.92	174.008	56.0419	15.8293	0.916027
Carlton County, Minnesota	27017	3	35386	21.8584	8.47003	2.09588	0.0511271	19.1503	6.49313	1.74383	0.0511271	23.8606	7.68133	5.77588	1.96238	4.71024	1.1882	4.03205	1.91126	26.5687	9.65823	6.12793	1.96238	750.824	272.939	173.174	55.4565	24.6063	0.926139
Carver County, Minnesota	27019	2	91042	16.8656	10.2942	3.4953	0.455599	8.34062	4.07097	2.38706	0.455599	58.8943	19.1473	14.6891	5.98301	50.5536	15.0764	12.3021	5.52741	67.4192	25.3705	15.7974	5.98301	740.529	278.668	173.517	65.7171	61.4362	0.911257
Cass County, Minnesota	27021	5	28567	11.0528	8.16587	6.08182	1.62248	8.62102	6.39069	5.76569	1.62248	19.2626	6.20111	4.66285	1.58423	10.6415	-0.189578	-1.10285	-0.0382591	21.6943	7.97629	4.97897	1.58423	759.419	279.213	174.291	55.4565	20.1101	0.926975
Chippewa County, Minnesota	27023	6	12441	3.29389	1.80938	0.778951	0.0845619	2.36817	1.13361	0.658607	0.0845619	4.67587	2.70902	2.0391	0.698353	2.3077	1.57541	1.38049	0.613791	5.60159	3.3848	2.15944	0.698353	450.253	272.068	173.575	56.1332	4.90324	0.87533
Chisago County, Minnesota	27025	2	53887	8.94606	5.49955	2.03142	0.347075	4.69048	2.39297	1.4782	0.347075	34.859	11.3331	8.69437	3.5413	30.1685	8.94017	7.21618	3.19422	39.1146	14.4397	9.2476	3.5413	725.863	267.963	171.611	65.7171	35.5733	0.909464
Clay County, Minnesota	27027	4	58999	9.85144	6.21512	2.64049	0.514477	5.60968	3.11864	2.08906	0.514477	20.7945	12.8534	9.67648	3.31825	15.1848	9.7348	7.58741	2.80377	25.0363	15.9499	10.2279	3.31825	424.351	270.342	173.357	56.2425	21.718	0.867462
Clearwater County, Minnesota	27029	6	8695	8.59998	7.80607	7.11683	2.43851	1.36	0.775	0.55	0.046	3.0646	1.89428	1.42607	0.489028	1.7046	1.11928	0.876075	0.443028	10.3046	8.92535	7.9929	2.88154	1185.12	1026.49	919.253	331.402	7.42304	0.720363
Cook County, Minnesota	27031	6	5176	39.7229	0.718389	0.30145	0.0793792	39.1149	0.228033	0.0780328	0.0180328	3.49015	1.12357	0.844852	0.287043	-35.6248	0.895535	0.766819	0.26901	4.09809	1.61392	1.06827	0.348389	791.748	311.809	206.389	67.3086	3.7497	0.914987
Cottonwood County, Minnesota	27033	6	11687	7.51257	5.34536	2.75906	0.390863	4.51434	2.95368	2.35368	0.390863	6.88291	2.54377	1.91445	0.654961	2.36857	-0.409912	-0.439231	0.264099	9.88114	4.93545	2.31983	0.654961	845.481	422.302	198.497	56.0419	9.22618	0.933716
Crow Wing County, Minnesota	27035	5	62500	19.4113	11.911	6.31809	1.6619	13.9814	7.93636	5.61136	1.6619	42.1434	13.567	10.2016	3.46603	28.162	5.63068	4.5902	1.80413	47.5734	17.5417	10.9083	3.46603	761.174	280.667	174.533	55.4565	44.1074	0.927144
Dakota County, Minnesota	27037	2	398552	168.666	74.7983	31.982	7.62977	130.67	47.0612	27.0425	7.62977	257.82	83.8207	64.3042	26.1917	127.15	36.7595	37.2617	18.5619	295.816	111.558	69.2437	26.1917	742.226	279.908	173.738	65.7171	269.624	0.91146
Dodge County, Minnesota	27039	4	20087	4.48801	2.95027	1.56362	0.133449	2.88527	1.78027	1.35527	0.133449	13.5446	4.36034	3.2787	1.11395	10.6593	2.58007	1.92343	0.980506	15.1473	5.53034	3.48706	1.11395	754.085	275.319	173.598	55.4565	14.0333	0.926459
Douglas County, Minnesota	27041	5	36009	9.97696	6.5099	3.81515	0.889616	7.26888	4.533	3.4631	0.889616	24.2807	7.81657	5.87757	1.99693	17.0118	3.28357	2.41447	1.10732	26.9888	9.79347	6.22962	1.99693	749.5	271.973	173.002	55.4565	24.9918	0.926009
Faribault County, Minnesota	27043	6	14553	4.87023	3.03575	1.70635	0.153675	3.6129	2.1179	1.5429	0.153675	8.5708	3.16758	2.38393	0.815577	4.95789	1.04967	0.841029	0.661902	9.82812	4.08542	2.54738	0.815577	675.333	280.727	175.042	56.0419	9.01255	0.917016
Fillmore County, Minnesota	27045	4	20866	20.2712	18.3209	16.7345	1.64356	18.5855	17.0904	16.5154	1.64356	12.2888	4.54165	3.41807	1.16937	-6.29677	-12.5487	-13.0973	-0.47419	13.9744	5.77217	3.6372	1.16937	669.721	276.63	174.312	56.0419	12.805	0.916321
Freeborn County, Minnesota	27047	5	31255	8.9745	5.43858	2.30829	0.234557	5.3407	2.7859	1.8359	0.234557	18.4072	6.8029	5.11989	1.75159	13.0665	4.017	3.28399	1.51703	22.041	9.45558	5.59228	1.75159	705.2	302.53	178.924	56.0419	20.2894	0.920531
Goodhue County, Minnesota	27049	5	46183	298.917	7.89187	4.58723	0.952532	295.076	5.0879	4.0879	0.952532	29.8754	9.71289	7.45138	3.03501	-265.201	4.62499	3.36348	2.08248	33.7164	12.5169	7.95071	3.03501	730.062	271.027	172.157	65.7171	30.6814	0.909984
Grant County, Minnesota	27051	6	6018	2.43473	1.95678	1.49188	0.457649	1.86824	1.54324	1.41824	0.457649	4.0579	1.30634	0.982288	0.333737	2.18966	-0.236898	-0.435953	-0.123912	4.62439	1.71988	1.05593	0.333737	768.427	285.789	175.462	55.4565	4.29065	0.927831
Hennepin County, Minnesota	27053	1	1152425	180.771	85.3416	21.661	2.51412	84.4402	15.0204	9.13807	2.51412	745.494	242.37	185.938	75.734	661.053	227.35	176.799	73.2199	841.824	312.691	198.46	75.734	730.48	271.333	172.211	65.7171	766.09	0.910036
Houston County, Minnesota	27055	4	19027	4.12564	2.81454	1.56756	0.175571	2.64725	1.73532	1.37537	0.175571	11.2057	4.14138	3.11682	1.06631	8.55845	2.40606	1.74145	0.890738	12.6841	5.2206	3.30901	1.06631	666.637	274.379	173.911	56.0419	11.6178	0.915933
Hubbard County, Minnesota	27057	6	20428	17.2229	13.9466	11.8022	4.07609	15.4405	12.6455	11.5705	4.07609	13.7745	4.43436	3.33436	1.13287	-1.66601	-8.21114	-8.23614	-2.94322	15.5568	5.73548	3.56607	1.13287	761.545	280.766	174.568	55.4565	14.424	0.927179
Isanti County, Minnesota	27059	2	37816	11.6095	4.77721	1.99575	0.40931	8.3487	2.39686	1.57186	0.40931	24.4628	7.9532	6.10141	2.48516	16.1141	5.55634	4.52955	2.07585	27.7236	10.3335	6.5253	2.48516	733.118	273.259	172.554	65.7171	25.2384	0.910359
Itasca County, Minnesota	27061	6	45058	340.385	27.2163	5.94369	0.426408	336.655	24.493	5.45872	0.426408	30.3824	9.78086	7.35459	2.49876	-306.272	-14.7122	1.89587	2.07235	34.1129	12.5041	7.83956	2.49876	757.088	277.512	173.988	55.4565	31.6141	0.92675
Jackson County, Minnesota	27063	6	10266	4.23573	2.70816	1.70247	0.161676	3.39291	2.0929	1.5929	0.161676	6.04603	2.23448	1.68168	0.575326	2.65312	0.141574	0.0887734	0.41365	6.88885	2.84974	1.79124	0.575326	671.035	277.59	174.483	56.0419	6.31352	0.916484
Kanabec County, Minnesota	27065	6	16239	3.7287	1.98728	0.708669	0.0402867	2.30557	0.948403	0.523663	0.0402867	10.9499	3.52504	2.65061	0.900558	8.64429	2.57664	2.12695	0.860271	12.373	4.56392	2.83562	0.900558	761.931	281.047	174.618	55.4565	11.4724	0.927216
Kandiyohi County, Minnesota	27067	5	42239	19.7035	11.4019	7.26948	1.57027	16.3046	8.92069	6.82762	1.57027	28.4815	9.16893	6.89446	2.34243	12.1769	0.248238	0.0668396	0.772155	31.8804	11.6501	7.33632	2.34243	754.763	275.815	173.686	55.4565	29.538	0.926525
Kittson County, Minnesota	27069	6	4552	2.15313	1.74522	1.36821	0.406415	1.93206	1.58384	1.33947	0.406415	1.60438	0.991692	0.746578	0.256016	-0.327679	-0.592152	-0.592891	-0.150399	1.82545	1.15307	0.775317	0.256016	401.021	253.311	170.324	56.2425	1.56943	0.859752
Koochiching County, Minnesota	27071	6	13311	63.9867	23.3465	7.03412	0.222712	62.6603	22.3603	6.8603	0.222712	4.69154	2.89992	2.18315	0.748643	-57.9688	-19.4604	-4.67715	0.525931	6.01794	3.88616	2.35696	0.748643	452.103	291.951	177.069	56.2425	5.2693	0.875598
Lac qui Parle County, Minnesota	27073	6	7259	5.22236	3.24195	2.18548	0.503649	4.62824	2.80824	2.10824	0.503649	2.72825	1.58064	1.18976	0.407471	-1.89999	-1.2276	-0.918479	-0.0961781	3.32237	2.01435	1.267	0.407471	457.69	277.497	174.542	56.1332	2.9149	0.877355
Lake County, Minnesota	27075	6	10866	173.23	147.962	24.1638	0.0104351	171.863	146.956	23.962	0.00021068	7.32688	2.35871	1.7736	0.60259	-164.536	-144.597	-22.1884	0.60238	8.69474	3.36471	1.97546	0.612815	800.179	309.655	181.802	56.3974	8.08193	0.929519
Lake of the Woods County, Minnesota	27077	6	4045	1.57297	1.21598	0.900439	0.290283	0.44	0.18	0.08	0.004	1.42568	0.881238	0.663424	0.227501	0.985683	0.701238	0.583424	0.223501	2.55866	1.91722	1.48386	0.513784	632.548	473.972	366.839	127.017	2.04487	0.799198
Le Sueur County, Minnesota	27079	2	27703	34.2138	27.3328	6.07053	0.357664	31.9616	25.6888	5.77775	0.357664	18.68	6.01356	4.52182	1.53631	-13.2817	-19.6752	-1.25593	1.17865	20.9321	7.65762	4.8146	1.53631	755.59	276.418	173.793	55.4565	19.3958	0.926605
Lincoln County, Minnesota	27081	6	5896	3.12626	2.29188	1.7516	0.318825	2.68412	1.96912	1.69412	0.318825	2.21597	1.28385	0.966364	0.330961	-0.468146	-0.68527	-0.727757	0.0121368	2.65811	1.60661	1.02384	0.330961	450.833	272.491	173.65	56.1332	2.32715	0.87549
Lyon County, Minnesota	27083	5	25857	10.7732	6.20734	3.32443	0.301828	8.57633	4.60363	3.03884	0.301828	9.71819	5.63034	4.238	1.45144	1.14186	1.02671	1.19917	1.14961	11.9151	7.23406	4.5236	1.45144	460.806	279.772	174.947	56.1332	10.4636	0.878185
McLeod County, Minnesota	27085	5	36651	12.1421	5.74206	2.07042	0.182065	9.25444	3.63404	1.69502	0.182065	23.7092	7.70819	5.91344	2.4086	14.4548	4.07415	4.21842	2.22653	26.5969	9.81621	6.28884	2.4086	725.68	267.829	171.587	65.7171	24.1883	0.909441
Mahnomen County, Minnesota	27087	6	5413	1.25122	0.726921	0.278479	0.0191122	0.753817	0.363817	0.213817	0.0191122	1.90784	1.17927	0.887791	0.30444	1.15402	0.815452	0.673974	0.285328	2.40524	1.54237	0.952453	0.30444	444.346	284.939	175.957	56.2425	2.1008	0.873426
Marshall County, Minnesota	27089	6	9439	1.68297	1.24991	0.549841	0.076122	0.923052	0.695168	0.451051	0.076122	3.32683	2.05637	1.5481	0.530873	2.40378	1.3612	1.09705	0.454751	4.08675	2.61111	1.64689	0.530873	432.964	276.63	174.477	56.2425	3.55588	0.870099
Martin County, Minnesota	27091	6	20840	9.61394	6.00137	3.81485	0.38865	7.96974	4.8011	3.6011	0.38865	12.2734	4.53599	3.41381	1.16791	4.3037	-0.265112	-0.187299	0.779262	13.9176	5.73625	3.62755	1.16791	667.833	275.252	174.067	56.0419	12.7497	0.916084
Meeker County, Minnesota	27093	6	23300	7.90983	5.68795	3.778	0.921966	5.85113	4.18511	3.51037	0.921966	15.7111	5.05779	3.80314	1.29214	9.85993	0.872685	0.292773	0.37017	17.7698	6.56064	4.07077	1.29214	762.651	281.573	174.711	55.4565	16.4776	0.927285
Mille Lacs County, Minnesota	27095	2	26097	5.40208	3.25102	1.29158	0.165708	3.09468	1.56662	0.991618	0.165708	17.5971	5.66494	4.25968	1.44725	14.5024	4.09833	3.26806	1.28154	19.9045	7.34934	4.55964	1.44725	762.711	281.616	174.719	55.4565	18.4572	0.92729
Morrison County, Minnesota	27097	6	33198	25.3754	18.6643	16.0695	4.99676	22.6673	16.6874	15.7175	4.99676	22.3852	7.20638	5.41874	1.84104	-0.282083	-9.48098	-10.2987	-3.15572	25.0933	9.18328	5.77079	1.84104	755.868	276.621	173.829	55.4565	23.2523	0.926632
Mower County, Minnesota	27099	5	39163	15.2744	9.25724	3.91241	0.489867	9.76151	4.97598	3.17598	0.489867	23.0645	8.52414	6.4153	2.19477	13.303	3.54816	3.23932	1.7049	28.5774	12.8054	7.15173	2.19477	729.705	326.977	182.615	56.0419	26.3827	0.923199
Murray County, Minnesota	27101	6	8725	3.35717	2.60339	1.83304	0.174337	2.5558	2.01839	1.72886	0.174337	3.27924	1.89986	1.43004	0.489762	0.723436	-0.118528	-0.298818	0.315426	4.08061	2.48486	1.53422	0.489762	467.692	284.798	175.842	56.1332	3.59085	0.879978
Nicollet County, Minnesota	27103	4	32727	9.76732	5.76279	2.75695	0.236459	7.07305	3.79597	2.4067	0.236459	19.2741	7.12329	5.36102	1.83408	12.2011	3.32732	2.95432	1.59762	21.9684	9.09011	5.71127	1.83408	671.262	277.756	174.513	56.0419	20.1343	0.916513
Nobles County, Minnesota	27105	5	21378	8.89254	5.92447	3.83848	0.49979	7.08254	4.60318	3.60318	0.49979	8.03479	4.65505	3.50389	1.20002	0.952244	0.0518689	-0.099288	0.700226	9.84478	5.97634	3.73919	1.20002	460.51	279.556	174.908	56.1332	8.64477	0.878106
Norman County, Minnesota	27107	6	6852	1.36964	0.872919	0.366577	0.0272481	0.734073	0.408953	0.283953	0.0272481	2.41503	1.49277	1.1238	0.385373	1.68095	1.08381	0.83985	0.358125	3.0506	1.95673	1.20643	0.385373	445.212	285.571	176.069	56.2425	2.66522	0.873673
Olmsted County, Minnesota	27109	4	144248	42.5148	24.1634	5.94311	0.29036	31.1851	15.8927	4.47025	0.29036	97.2737	31.3149	23.5468	8.00015	66.0887	15.4222	19.0766	7.70979	108.603	39.5856	25.0197	8.00015	752.894	274.427	173.449	55.4611	100.603	0.926336
Otter Tail County, Minnesota	27111	5	57303	78.5061	42.8921	37.7975	12.8566	73.6979	39.3821	37.1724	12.8566	38.6391	12.4389	9.35328	3.17782	-35.0588	-26.9432	-27.8192	-9.67876	43.4473	15.9489	9.97835	3.17782	758.203	278.326	174.133	55.4565	40.2695	0.926858
Pennington County, Minnesota	27113	6	13930	3.94266	2.67711	1.65051	0.458111	2.86496	1.885	1.51	0.458111	4.9097	3.03477	2.28467	0.783458	2.04475	1.14977	0.774673	0.325346	5.98741	3.82688	2.42519	0.783458	429.821	274.723	174.098	56.2425	5.20395	0.869149
Pine County, Minnesota	27115	6	29750	6.35274	3.85701	1.70294	0.226491	3.96244	2.1121	1.3922	0.226491	20.0603	6.45791	4.85594	1.64983	16.0978	4.34581	3.46374	1.42334	22.4506	8.20283	5.16668	1.64983	754.641	275.725	173.67	55.4565	20.8007	0.926513
Pipestone County, Minnesota	27117	6	9596	4.81061	3.43701	2.41513	0.256346	3.8158	2.7108	2.2858	0.256346	3.6066	2.08952	1.5728	0.538654	-0.209204	-0.621278	-0.713001	0.282308	4.6014	2.81573	1.70212	0.538654	479.513	293.428	177.379	56.1332	4.06275	0.882937
Polk County, Minnesota	27119	4	31600	19.2075	11.4776	6.85439	1.85772	16.6239	9.59148	6.51851	1.85772	11.1376	6.88433	5.18274	1.77726	-5.48627	-2.70715	-1.33577	-0.0804563	13.7213	8.7704	5.51862	1.77726	434.217	277.544	174.64	56.2425	11.944	0.870474
Pope County, Minnesota	27121	6	10995	22.7357	21.8064	20.8286	7.36977	21.8376	21.1508	20.7118	7.36977	7.41387	2.38671	1.79466	0.609744	-14.4237	-18.7641	-18.9172	-6.76003	8.31196	3.04232	1.91141	0.609744	755.976	276.7	173.844	55.4565	7.70221	0.926643
Ramsey County, Minnesota	27123	1	508640	140.472	45.6147	11.9724	0.728308	107.188	21.2936	7.6436	0.728308	329.035	106.974	82.0663	33.4263	221.847	85.6801	74.4227	32.698	362.319	131.295	86.3951	33.4263	712.329	258.129	169.855	65.7171	328.893	0.907743
Red Lake County, Minnesota	27125	6	4089	3.36305	2.63098	2.19859	0.713259	1.18	0.53	0.28	0.018	1.44119	0.890824	0.670641	0.229975	0.261191	0.360824	0.390641	0.211975	3.62424	2.9918	2.58923	0.925235	886.338	731.67	633.22	226.274	2.699	0.744709
Redwood County, Minnesota	27127	6	16059	5.01839	3.55751	2.33667	0.242485	3.54	2.43725	2.01225	0.186251	6.03567	3.49684	2.6321	0.901443	2.49567	1.05959	0.619845	0.715193	7.51407	4.6171	2.95651	0.957677	467.904	287.508	184.103	59.6349	6.55639	0.872549
Renville County, Minnesota	27129	6	15730	5.28709	3.70073	2.38844	0.298918	4.05741	2.80306	2.22858	0.298918	5.91202	3.4252	2.57817	0.882975	1.85462	0.622134	0.349592	0.584057	7.14171	4.32287	2.73803	0.882975	454.018	274.817	174.064	56.1332	6.25873	0.876364
Rice County, Minnesota	27131	5	64142	34.0622	7.95755	3.08185	0.422889	28.7013	4.0441	2.38493	0.422889	41.4929	13.4899	10.349	4.21522	12.7916	9.4458	7.96403	3.79233	46.8538	17.4034	11.0459	4.21522	730.47	271.325	172.21	65.7171	42.6386	0.910035
Rock County, Minnesota	27133	6	9687	5.27229	3.79669	2.88384	0.274458	4.65053	3.34281	2.80301	0.274458	3.6408	2.10934	1.58771	0.543762	-1.00974	-1.23347	-1.2153	0.269304	4.26255	2.56322	1.66854	0.543762	440.028	264.604	172.246	56.1332	3.71879	0.872433
Roseau County, Minnesota	27135	6	15629	3.41839	2.06274	0.83055	0.0644488	1.99527	1.02027	0.645267	0.0644488	5.50853	3.40491	2.56333	0.879014	3.51326	2.38465	1.91806	0.814565	6.93165	4.44739	2.74861	0.879014	443.512	284.56	175.866	56.2425	6.05264	0.873188
St. Louis County, Minnesota	27137	3	200226	227.873	130.93	25.625	0.45049	208.149	116.122	23.0294	0.45049	135.011	43.4636	32.6819	11.1038	-73.1374	-72.6588	9.65245	10.6533	154.736	58.2712	35.2775	11.1038	772.806	291.027	176.188	55.4565	143.632	0.92824
Scott County, Minnesota	27139	2	129928	38.0103	17.9564	4.68765	0.437369	25.589	8.88888	3.07289	0.437369	84.0493	27.3256	20.9632	8.53849	58.4603	18.4367	17.8903	8.10112	96.4705	36.3931	22.5779	8.53849	742.492	280.102	173.773	65.7171	87.932	0.911491
Sherburne County, Minnesota	27141	2	88499	391.556	34.3932	27.565	9.56165	383.874	28.7852	26.5664	9.56165	57.2492	18.6125	14.2788	5.81589	-326.625	-10.1727	-12.2875	-3.74575	64.9313	24.2204	15.2775	5.81589	733.696	273.68	172.629	65.7171	59.1154	0.91043
Sibley County, Minnesota	27143	2	15226	5.78167	3.41946	1.85027	0.155561	4.45527	2.43253	1.61774	0.13	10.2668	3.30515	2.48526	0.844381	5.81154	0.872619	0.867525	0.714381	11.5932	4.29208	2.7178	0.869942	761.409	281.891	178.497	57.1353	10.7233	0.924961
Stearns County, Minnesota	27145	4	150642	52.5396	39.6759	27.5092	7.52026	39.7867	30.3663	25.8513	7.52026	97.449	31.682	24.3053	9.89975	57.6623	1.31571	-1.54605	2.37949	110.202	40.9916	25.9631	9.89975	731.548	272.113	172.35	65.7171	100.302	0.910167
Steele County, Minnesota	27147	5	36576	13.6537	5.6978	2.01553	0.142128	10.4344	3.34771	1.59702	0.142128	24.663	7.93965	5.97011	2.02838	14.2286	4.59194	4.37309	1.88625	27.8823	10.2897	6.38862	2.02838	762.311	281.325	174.667	55.4565	25.8539	0.927252
Stevens County, Minnesota	27149	6	9726	8.80845	7.83536	6.93031	2.05263	7.78602	7.07102	6.79602	2.05263	6.55819	2.11125	1.58753	0.53937	-1.22783	-4.95977	-5.20849	-1.51326	7.58063	2.87559	1.72182	0.53937	779.419	295.66	177.033	55.4565	7.04126	0.928849
Swift County, Minnesota	27151	6	9783	12.8791	11.6996	10.8769	3.71166	12.133	11.1549	10.7799	3.71166	6.59662	2.12362	1.59683	0.542531	-5.5364	-9.03127	-9.18307	-3.16913	7.34273	2.66828	1.69382	0.542531	750.56	272.746	173.139	55.4565	6.8002	0.926113
Todd County, Minnesota	27153	6	24895	13.7944	10.7089	8.39101	2.42782	11.5146	9.04464	8.09464	2.42782	16.7866	5.40402	4.06348	1.38059	5.27192	-3.64062	-4.03115	-1.04723	19.0663	7.06825	4.35985	1.38059	765.87	283.922	175.13	55.4565	17.6857	0.92759
Traverse County, Minnesota	27155	6	3558	0.693968	0.481897	0.249516	0.019	0.39	0.26	0.21	0.019	2.39914	0.772344	0.580754	0.197314	2.00914	0.512344	0.370754	0.178314	2.70311	0.994241	0.62027	0.197314	759.727	279.438	174.331	55.4565	2.50579	0.927005
Wabasha County, Minnesota	27157	4	21676	7.71152	4.3991	2.33964	0.272156	5.98442	3.11318	2.11318	0.272156	14.6079	4.70266	3.5361	1.20141	8.62349	1.58948	1.42292	0.929253	16.335	5.98859	3.76256	1.20141	753.599	276.277	173.582	55.4258	15.1336	0.926452
Wadena County, Minnesota	27159	6	13843	10.2389	9.30912	8.43736	2.92428	9.20265	8.55265	8.30265	2.92428	9.33426	3.00494	2.25952	0.767684	0.13161	-5.54771	-6.04313	-2.1566	10.3705	3.7614	2.39424	0.767684	749.152	271.719	172.956	55.4565	9.60283	0.925974
Waseca County, Minnesota	27161	6	19136	6.65511	3.86352	2.03988	0.173788	5.08001	2.675	1.75	0.138002	11.2699	4.1651	3.13467	1.07242	6.18989	1.4901	1.38467	0.934415	12.845	5.35362	3.42455	1.1082	671.248	279.767	178.958	57.9119	11.7368	0.913725
Washington County, Minnesota	27163	2	238136	180.388	39.1276	11.3545	1.72709	155.269	20.7908	8.08904	1.72709	154.048	50.0831	38.4219	15.6496	-1.22079	29.2923	30.3329	13.9225	179.167	68.4199	41.6874	15.6496	752.372	287.314	175.057	65.7171	163.517	0.912654
Watonwan County, Minnesota	27165	6	11211	4.87239	3.24997	2.15296	0.405746	3.91904	2.55402	2.02902	0.405746	6.60257	2.44016	1.83648	0.628285	2.68353	-0.113855	-0.192542	0.22254	7.55593	3.13611	1.96041	0.628285	673.974	279.735	174.865	56.0419	6.92764	0.916849
Wilkin County, Minnesota	27167	5	6576	1.15084	0.76773	0.394159	0.0929074	0.694885	0.434885	0.334885	0.0929074	4.43416	1.42747	1.07337	0.364682	3.73928	0.992585	0.738482	0.271774	4.89011	1.76031	1.13264	0.364682	743.63	267.688	172.239	55.4565	4.52543	0.925425
Winona County, Minnesota	27169	5	51461	17.5308	11.7904	7.71386	0.735582	13.9108	9.14785	7.24326	0.735582	34.6999	11.1708	8.39972	2.85385	20.789	2.02293	1.15646	2.11826	38.3199	13.8134	8.87032	2.85385	744.639	268.424	172.37	55.4565	35.466	0.925526
Wright County, Minnesota	27171	2	124700	219.835	17.2	7.21083	1.52403	207.027	7.8501	5.54577	1.52403	80.6673	26.226	20.1197	8.19492	-126.36	18.3759	14.5739	6.67088	93.4754	35.576	21.7847	8.19492	749.603	285.293	174.697	65.7171	85.2805	0.912331
Yellow Medicine County, Minnesota	27173	6	10438	3.80351	2.54278	1.50458	0.162237	2.78107	1.7964	1.37166	0.162237	3.92306	2.27287	1.71081	0.585918	1.14199	0.476469	0.339147	0.423682	4.9455	3.01925	1.84372	0.585918	473.797	289.256	176.636	56.1332	4.35958	0.881525
Adams County, Mississippi	28001	5	32297	10.7204	5.89708	1.31231	0.0121122	6.25753	2.63921	0.732137	0.0121122	35.6944	27.5212	24.8009	8.54857	29.4368	24.882	24.0688	8.53646	40.1572	30.7791	25.3811	8.54857	1243.37	953	785.864	264.686	31.6086	0.787122
Alcorn County, Mississippi	28003	5	37057	9.80655	5.82625	1.75894	0.10301	4.69435	2.09435	1.09435	0.10301	39.8674	31.5919	28.4707	9.82306	35.1731	29.4975	27.3763	9.72005	44.9796	35.3238	29.1353	9.82306	1213.8	953.229	786.228	265.08	35.1566	0.781611
Amite County, Mississippi	28005	5	13131	3.48831	2.51947	1.12915	0.14702	1.42962	0.949471	0.645146	0.055	14.509	11.1867	10.081	3.4748	13.0793	10.2373	9.43586	3.4198	16.5677	12.7567	10.565	3.56682	1261.72	971.498	804.585	271.634	13.0008	0.784712
Attala County, Mississippi	28007	6	19564	9.57972	2.81036	1.08551	0.130004	6.87163	0.833459	0.733459	0.130004	21.622	16.671	15.0232	5.17832	14.7503	15.8376	14.2898	5.04832	24.33	18.6479	15.3753	5.17832	1243.61	953.176	785.896	264.686	19.1517	0.787164
Benton County, Mississippi	28009	2	8729	12.4842	1.75516	0.764292	0.285211	11.2822	0.877668	0.608026	0.285211	9.39209	7.44252	6.70721	2.31415	-1.89006	6.56485	6.09918	2.02894	10.5941	8.32001	6.86348	2.31415	1213.67	953.146	786.284	265.11	8.28	0.781564
Bolivar County, Mississippi	28011	5	34145	609.848	606.819	603.307	221.987	605.123	603.368	602.693	221.987	37.739	29.0976	26.2215	9.03824	-567.384	-574.27	-576.471	-212.948	42.4643	32.5489	26.8359	9.03824	1243.65	953.255	785.94	264.702	33.4261	0.787157
Calhoun County, Mississippi	28013	6	14962	3.99442	3.10984	1.74133	0.388405	1.92191	1.59691	1.47191	0.388405	16.0967	12.7554	11.4952	3.96612	14.1748	11.1585	10.0233	3.57772	18.1692	14.2684	11.7646	3.96612	1214.36	953.64	786.302	265.08	14.2031	0.781712
Carroll County, Mississippi	28015	5	10597	11.4232	10.6826	9.2545	3.23646	9.97249	9.62351	9.0659	3.23646	11.7117	9.03	8.13744	2.80488	1.73922	-0.59351	-0.928457	-0.431582	13.1625	10.0891	8.32604	2.80488	1242.09	952.067	785.698	264.686	10.3576	0.786903
Chickasaw County, Mississippi	28017	6	17392	13.5829	12.3488	10.6813	2.84464	11.1788	10.5938	10.3688	2.84464	18.711	14.8271	13.3622	4.61027	7.53227	4.2333	2.99342	1.76563	21.1151	16.5821	13.6747	4.61027	1214.07	953.43	786.264	265.08	16.5049	0.781661
Choctaw County, Mississippi	28019	6	8547	11.2487	5.0878	1.54647	0.039	9.70762	3.91516	1.34247	0.039	9.19091	7.28309	6.56354	2.26458	-0.516713	3.36794	5.22107	2.22558	10.732	8.45574	6.76754	2.26458	1255.64	989.323	791.803	264.956	8.46741	0.788988
Claiborne County, Mississippi	28021	5	9604	34.9747	2.32305	1.22721	0.374138	32.9298	0.636303	0.336303	0.108303	10.6076	8.17872	7.37031	2.54046	-22.3222	7.54242	7.03401	2.43215	12.6525	9.86547	8.26121	2.80629	1317.42	1027.23	860.185	292.2	9.84621	0.778203
Clarke County, Mississippi	28023	5	16732	4.23144	3.17628	0.806469	0.0630098	1.79972	1.36756	0.382161	0.017	18.4921	14.2578	12.8485	4.42873	16.6923	12.8902	12.4664	4.41173	20.9238	16.0665	13.2728	4.47474	1250.52	960.228	793.26	267.436	16.449	0.786141
Clay County, Mississippi	28025	6	20634	5.95915	4.33406	2.24162	0.173	3.1129	2.2563	1.87161	0.173	22.1989	17.5909	15.853	5.46966	19.086	15.3346	13.9814	5.29666	25.0452	19.6687	16.223	5.46966	1213.78	953.218	786.227	265.08	19.5755	0.781608
Coahoma County, Mississippi	28027	5	26151	227.551	224.629	221.842	80.7323	223.931	221.987	221.372	80.7323	28.9019	22.284	20.0814	6.92181	-195.03	-199.703	-201.29	-73.8105	32.5218	24.9266	20.552	6.92181	1243.62	953.179	785.896	264.686	25.6	0.787164
Copiah County, Mississippi	28029	3	29449	14.8338	7.7168	2.1541	0.100346	10.6059	4.58565	1.46022	0.039	32.5468	25.0943	22.6139	7.79474	21.9409	20.5087	21.1537	7.75574	36.7747	28.2255	23.3078	7.85609	1248.76	958.453	791.463	266.769	28.9186	0.786372
Covington County, Mississippi	28031	6	19568	9.45007	6.2944	3.63347	0.289	6.7558	4.32758	3.28321	0.289	21.6264	16.6744	15.0263	5.17938	14.8706	12.3469	11.7431	4.89038	24.3207	18.6413	15.3765	5.17938	1242.88	952.64	785.8	264.686	19.1413	0.787038
DeSoto County, Mississippi	28033	2	161252	60.4112	38.4823	23.6205	7.46809	38.0286	22.1133	20.6151	7.45709	178.219	137.411	123.829	42.6822	140.19	115.297	103.214	35.2251	200.601	153.78	126.834	42.6932	1244.02	953.661	786.558	264.761	157.908	0.787174
Forrest County, Mississippi	28035	4	74934	23.4648	13.4285	4.30501	0.536659	13.116	5.87395	2.95967	0.536659	82.8164	63.8534	57.5419	19.834	69.7004	57.9794	54.5822	19.2973	93.1652	71.4079	58.8872	19.834	1243.3	952.945	785.854	264.686	73.3312	0.787109
Franklin County, Mississippi	28037	6	8118	1.99877	1.29306	0.401931	0.0406732	0.796715	0.393175	0.17354	0.01	8.96752	6.91417	6.23075	2.14766	8.17081	6.52099	6.05721	2.13766	10.1696	7.81405	6.45914	2.17834	1252.72	962.559	795.656	268.334	7.99125	0.785799
George County, Mississippi	28039	6	22578	6.37692	4.29838	1.94983	0.422641	3.25433	2.01889	1.54389	0.422641	24.9541	19.2402	17.3384	5.97635	21.6998	17.2213	15.7945	5.55371	28.0767	21.5197	17.7444	5.97635	1243.54	953.126	785.914	264.698	22.1004	0.787142
Greene County, Mississippi	28041	6	14400	12.6868	6.42185	2.98829	0.430405	9.78527	4.05753	1.81774	0.093	15.9092	12.2664	11.0539	3.81016	6.12396	8.20885	9.23619	3.71716	18.8107	14.6307	12.2245	4.14756	1306.3	1016.02	848.923	288.025	14.6632	0.779511
Grenada County, Mississippi	28043	5	21906	16.6097	10.0728	6.05724	1.74304	13.5839	7.86388	5.66388	1.74304	24.2103	18.6667	16.8216	5.79821	10.6264	10.8028	11.1578	4.05518	27.2362	20.8756	17.215	5.79821	1243.32	952.963	785.858	264.686	21.438	0.787114
Hancock County, Mississippi	28045	3	43929	12.7757	7.00819	1.61479	0.0273366	6.66867	2.53886	0.784814	0.012	48.55	37.4331	33.7331	11.6274	41.8813	34.8943	32.9483	11.6154	54.657	41.9025	34.5631	11.6427	1244.21	953.868	786.794	265.035	43.0143	0.786985
Harrison County, Mississippi	28047	3	187105	57.7797	27.2172	5.82182	0.038862	31.9148	8.33204	2.44736	0.0337498	206.787	159.437	143.678	49.5241	174.872	151.105	141.231	49.4904	232.652	178.323	147.053	49.5292	1243.43	953.062	785.936	264.713	183.123	0.78711
Hinds County, Mississippi	28049	3	245285	82.3864	41.7789	9.71414	0.086446	48.4248	16.9683	5.23903	0.060885	271.087	209.014	188.355	64.9235	222.662	192.046	183.116	64.8627	305.048	233.825	192.83	64.9491	1243.65	953.278	786.145	264.79	240.099	0.787086
Holmes County, Mississippi	28051	6	19198	50.2092	48.4123	46.2117	16.8587	47.5564	46.4757	45.8668	16.8587	21.2175	16.3592	14.7422	5.08144	-26.3389	-30.1166	-31.1247	-11.7772	23.8703	18.2957	15.087	5.08145	1243.37	953.001	785.864	264.686	18.7888	0.787123
Humphreys County, Mississippi	28053	6	9375	145.426	142.281	140.426	46.3226	24.35	21.555	20.48	2.005	10.3612	7.9887	7.19907	2.48143	-13.9888	-13.5663	-13.2809	0.476433	131.437	128.714	127.145	46.7991	14020	13729.5	13562.2	4991.9	84.6383	0.643944
Issaquena County, Mississippi	28055	6	1406	47.5039	47.3217	47.1556	17.2419	47.3105	47.1805	47.1305	17.2419	1.5539	1.19809	1.07967	0.372149	-45.7566	-45.9824	-46.0508	-16.8697	1.74733	1.3393	1.10482	0.372149	1242.77	952.56	785.786	264.687	1.37519	0.787019
Itawamba County, Mississippi	28057	5	23401	16.3309	7.28847	1.9948	0.028	13.0978	4.9283	1.57449	0.028	25.1758	19.9499	17.9789	6.20313	12.078	15.0216	16.4044	6.17513	28.4089	22.31	18.3992	6.20313	1214	953.38	786.255	265.08	22.2057	0.781648
Jackson County, Mississippi	28059	3	139668	107.863	34.6344	8.68699	0.174732	88.5745	20.554	6.17953	0.174732	154.36	119.015	107.251	36.9682	65.7854	98.461	101.072	36.7935	173.648	133.095	109.759	36.9682	1243.29	952.941	785.854	264.686	136.68	0.787109
Jasper County, Mississippi	28061	5	17062	15.398	9.57399	2.51696	0.0801123	13.0215	7.83543	2.196	0.0750001	18.8568	14.539	13.1019	4.51607	5.8353	6.70358	10.9059	4.44107	21.2333	16.2776	13.4229	4.52119	1244.48	954.025	786.712	264.986	16.7121	0.78707
Jefferson County, Mississippi	28063	6	7726	1.97389	1.23164	0.418306	0.021	0.91	0.455	0.28	0.021	8.54976	6.59206	5.94048	2.04761	7.63976	6.13706	5.66048	2.02661	9.61365	7.3687	6.07879	2.04761	1244.32	953.754	786.796	265.029	7.56604	0.78701
Jefferson Davis County, Mississippi	28065	6	12487	8.12715	3.73705	1.25079	0.0898163	6.40006	2.47627	1.02627	0.0898163	13.8005	10.6405	9.58878	3.30514	7.40047	8.16425	8.56251	3.21532	15.5276	11.9013	9.8133	3.30514	1243.5	953.095	785.881	264.686	12.2225	0.787145
Jones County, Mississippi	28067	5	67761	25.1046	12.4267	3.64305	0.19153	15.7368	5.58819	2.42524	0.19153	74.8889	57.7411	52.0337	17.9354	59.1521	52.1529	49.6085	17.7439	84.2567	64.5795	53.2515	17.9354	1243.44	953.049	785.873	264.686	66.3213	0.787134
Kemper County, Mississippi	28069	5	10456	4.62084	2.16198	0.8372	0.0704549	2.99047	0.948455	0.623455	0.0704549	11.249	8.91397	8.03328	2.77167	8.25852	7.96551	7.40983	2.70122	12.8794	10.1275	8.24703	2.77167	1231.77	968.582	788.737	265.08	10.1077	0.784797
Lafayette County, Mississippi	28071	5	47351	9.06586	5.79485	1.25058	0.0273366	2.51672	1.01398	0.399188	0.0273366	50.9486	40.3729	36.3841	12.5534	48.4319	39.3589	35.9849	12.526	57.4977	45.1537	37.2355	12.5534	1214.29	953.596	786.372	265.113	44.9444	0.781672
Lamar County, Mississippi	28073	4	55658	15.3759	6.77635	1.59719	0.0701203	7.69376	1.16841	0.598512	0.0701203	61.5127	47.4278	42.7398	14.7319	53.819	46.2593	42.1413	14.6618	69.1949	53.0357	43.7385	14.7319	1243.22	952.885	785.844	264.686	54.463	0.787095
Lauderdale County, Mississippi	28075	5	80261	18.1367	10.7017	2.33485	0.0509508	6.93128	2.49194	0.781988	0.0100532	88.7038	68.3927	61.6325	21.244	81.7725	65.9007	60.8505	21.2339	99.9092	76.6024	63.1853	21.2849	1244.8	954.417	787.248	265.196	78.6243	0.786958
Lawrence County, Mississippi	28077	6	12929	52.303	19.7692	6.34661	0.214917	50.5069	18.458	6.1131	0.214917	14.289	11.0172	9.92819	3.42213	-36.2178	-7.44084	3.81508	3.20721	16.0852	12.3284	10.1617	3.42213	1244.12	953.544	785.961	264.686	12.6631	0.78725
Leake County, Mississippi	28079	6	23805	8.92839	5.57052	2.64749	0.184	5.64	3.17	2.22	0.184	26.3091	20.2849	18.2799	6.30085	20.6691	17.1149	16.0599	6.11685	29.5975	22.6854	18.7074	6.30085	1243.33	952.969	785.859	264.686	23.2966	0.787115
Lee County, Mississippi	28081	5	82910	13.0584	9.44583	2.37338	0.11401	1.48	0.96	0.76	0.068	89.198	70.6826	63.6993	21.9778	87.718	69.7226	62.9393	21.9098	100.776	79.1684	65.3127	22.0238	1215.49	954.872	787.754	265.635	78.7526	0.781459
Leflore County, Mississippi	28083	5	32317	278.349	274.389	270.661	88.475	273.886	271.131	270.081	88.475	35.7165	27.5382	24.8162	8.55386	-238.169	-243.592	-245.264	-79.9211	40.1793	30.7961	25.3964	8.55386	1243.29	952.937	785.853	264.686	31.6254	0.787108
Lincoln County, Mississippi	28085	5	34869	11.5345	7.63372	1.89094	0.0684488	6.71227	4.11349	1.26405	0.0684488	38.5369	29.7129	26.7759	9.22934	31.8247	25.5994	25.5119	9.16089	43.3591	33.2331	27.4028	9.22934	1243.49	953.084	785.879	264.686	34.1298	0.787142
Lowndes County, Mississippi	28087	5	59779	63.8926	29.7049	15.5513	2.62669	50.6009	18.644	9.44792	0.765845	64.3127	50.9629	45.9279	15.8462	13.7118	32.3189	36.48	15.0804	77.6044	62.0238	52.0313	17.707	1298.19	1037.55	870.394	296.208	59.8974	0.77183
Madison County, Mississippi	28089	3	95203	22.2593	13.9589	4.22192	0.420293	9.10572	4.35685	2.51196	0.420293	105.218	81.1252	73.1065	25.1989	96.1118	76.7683	70.5945	24.7786	118.371	90.7272	74.8164	25.1989	1243.35	952.987	785.862	264.686	93.1722	0.787119
Marion County, Mississippi	28091	6	27088	7.58846	5.18347	2.26265	0.258142	3.45724	2.06323	1.38901	0.115	29.9374	23.0824	20.8009	7.16982	26.4802	21.0192	19.4119	7.05482	34.0686	26.2027	21.6745	7.31296	1257.7	967.317	800.153	269.97	26.7557	0.785346
Marshall County, Mississippi	28093	2	37144	9.14708	5.46885	1.43037	0.0657854	3.91054	1.62007	0.665476	0.03	39.96	31.6652	28.5368	9.84586	36.0494	30.0451	27.8713	9.81586	45.1965	35.514	29.3016	9.88164	1216.79	956.117	788.866	266.036	35.3149	0.781363
Monroe County, Mississippi	28095	6	36989	34.8141	21.9222	14.0868	3.71074	29.7019	18.1903	13.4222	3.71074	39.7943	31.5339	28.4184	9.80503	10.0924	13.3436	14.9962	6.09429	44.9065	35.2658	29.083	9.80503	1214.05	953.414	786.261	265.08	35.1014	0.781657
Montgomery County, Mississippi	28097	6	10925	2.61854	1.75692	0.678302	0.112132	0.85	0.395	0.22	0.015	12.0742	9.3095	8.38932	2.8917	11.2242	8.9145	8.16932	2.8767	13.8428	10.6714	8.84762	2.98883	1267.07	976.789	809.851	273.577	10.8539	0.784087
Neshoba County, Mississippi	28099	6	29676	7.02884	4.81961	1.94075	0.142561	2.87	1.765	1.34	0.117	31.9267	25.2994	22.7999	7.86651	29.0567	23.5344	21.4599	7.74951	36.0855	28.354	23.4007	7.89207	1215.98	955.454	788.538	265.941	28.1934	0.781295
Newton County, Mississippi	28101	6	21720	6.16258	3.98433	1.6521	0.134898	3.15053	1.78553	1.26053	0.134898	24.0048	18.5082	16.6788	5.74898	20.8542	16.7227	15.4183	5.61409	27.0168	20.707	17.0704	5.74898	1243.87	953.362	785.929	264.686	21.2678	0.787207
Noxubee County, Mississippi	28103	6	11545	31.0603	30.1763	29.0479	5.537	29.4713	29.0163	28.8413	5.537	12.4206	9.84236	8.86996	3.06035	-17.0508	-19.174	-19.9714	-2.47665	14.0095	11.0023	9.07652	3.06035	1213.47	952.991	786.186	265.08	10.9492	0.781552
Oktibbeha County, Mississippi	28105	5	47671	8.84166	6.0222	1.66784	0.124795	2.03	0.99	0.59	0.043	51.2864	40.6406	36.6254	12.6366	49.2564	39.6506	36.0354	12.5936	58.0981	45.6728	37.7032	12.7184	1218.73	958.083	790.904	266.796	45.3797	0.781087
Panola County, Mississippi	28107	6	34707	50.9339	48.2961	44.3873	15.9149	46.1395	44.7962	43.7641	15.9149	38.3513	29.5697	26.6469	9.18487	-7.78828	-15.2265	-17.1172	-6.73005	43.1456	33.0696	27.2702	9.18487	1243.14	952.822	785.726	264.64	33.9607	0.787119
Pearl River County, Mississippi	28109	5	55834	11.6975	7.90701	1.92677	0.0612244	3.97394	2.26885	0.922716	0.0612244	61.7073	47.5777	42.875	14.7785	57.7333	45.3089	41.9523	14.7173	69.4308	53.2159	43.879	14.7785	1243.52	953.109	785.884	264.686	54.6523	0.787148
Perry County, Mississippi	28111	4	12250	31.5637	12.5605	4.31638	0.324059	29.8643	11.3199	4.09545	0.324059	13.5375	10.4377	9.40602	3.24214	-16.3268	-0.88221	5.31057	2.91808	15.237	11.6783	9.62695	3.24214	1243.83	953.333	785.873	264.665	11.9948	0.787219
Pike County, Mississippi	28113	5	40404	13.8447	8.35287	2.44945	0.111561	8.26283	4.27811	1.72381	0.111561	44.6575	34.4319	31.0286	10.6952	36.3946	30.1538	29.3048	10.5836	50.2394	38.5067	31.7542	10.6952	1243.43	953.042	785.917	264.706	39.5442	0.787116
Pontotoc County, Mississippi	28115	5	29957	6.17266	4.08223	1.22851	0.0653366	2.04145	1.06645	0.69145	0.0653366	32.229	25.539	23.0158	7.94099	30.1875	24.4725	22.3243	7.87566	36.3602	28.5548	23.5528	7.94099	1213.75	953.192	786.222	265.08	28.4192	0.781602
Prentiss County, Mississippi	28117	6	25276	5.31564	3.26681	0.744433	0.012	1.82	0.715	0.29	0.012	27.193	21.5483	19.4194	6.70015	25.373	20.8333	19.1294	6.68815	30.6886	24.1002	19.8738	6.70015	1214.14	953.48	786.273	265.08	23.9884	0.781673
Quitman County, Mississippi	28119	6	8223	186.78	186.084	185.254	66.8933	185.647	185.257	185.107	66.8933	9.08799	7.00705	6.31445	2.17651	-176.559	-178.25	-178.793	-64.7168	10.221	7.83412	6.46174	2.17652	1242.97	952.709	785.813	264.686	8.04445	0.787054
Rankin County, Mississippi	28121	3	141617	29.4565	18.7791	4.96537	0.200234	9.89198	4.49698	2.42198	0.200234	156.514	120.676	108.748	37.4841	146.622	116.179	106.326	37.2838	176.078	134.958	111.291	37.4841	1243.34	952.978	785.86	264.686	138.594	0.787117
Scott County, Mississippi	28123	6	28264	14.6607	7.36867	2.63087	0.15001	10.64	4.4	2	0.104	31.2371	24.0846	21.7039	7.48109	20.5971	19.6846	19.7039	7.37709	35.2578	27.0532	22.3348	7.5271	1247.45	957.162	790.221	266.314	27.7307	0.786513
Sharkey County, Mississippi	28125	6	4916	96.2798	95.967	95.5108	35.0533	95.6028	95.4728	95.4228	35.0533	5.43312	4.18906	3.775	1.3012	-90.1697	-91.2837	-91.6478	-33.7521	6.11014	4.68329	3.86301	1.3012	1242.91	952.662	785.804	264.686	4.80894	0.787043
Simpson County, Mississippi	28127	3	27503	8.20739	5.13942	1.94538	0.14501	4.40779	2.36571	1.45143	0.14501	30.395	23.4352	21.1188	7.2794	25.9872	21.0695	19.6674	7.13439	34.1946	26.2089	21.6128	7.2794	1243.3	952.948	785.833	264.677	26.9152	0.787118
Smith County, Mississippi	28129	6	16491	7.75287	4.47086	1.98414	0.162877	5.34874	2.68227	1.56342	0.116868	18.2268	14.0533	12.6642	4.3652	12.8781	11.371	11.1008	4.24834	20.6309	15.8419	13.0849	4.41121	1251.04	960.638	793.459	267.492	16.2197	0.786185
Stone County, Mississippi	28131	6	17786	7.8677	4.51739	1.90733	0.190244	5.40831	2.72203	1.58761	0.190244	19.6569	15.156	13.6579	4.70771	14.2486	12.4339	12.0703	4.51746	22.1163	16.9513	13.9776	4.70771	1243.47	953.07	785.877	264.686	17.4086	0.787139
Sunflower County, Mississippi	28133	5	29450	506.376	504.565	501.852	170.513	502.314	501.599	501.324	170.513	32.5479	25.0952	22.6147	7.79501	-469.766	-476.504	-478.71	-162.718	36.61	28.0605	23.1428	7.79501	1243.12	952.819	785.832	264.686	28.815	0.78708
Tallahatchie County, Mississippi	28135	6	15378	174.301	173.596	172.27	63.1872	172.173	172.043	171.993	63.1872	16.9956	13.104	11.8088	4.07034	-155.177	-158.939	-160.184	-59.1168	19.1234	14.6573	12.0854	4.07034	1243.56	953.135	785.888	264.686	15.0531	0.787154
Tate County, Mississippi	28137	2	28886	12.2587	9.47314	6.33779	1.95307	8.14128	6.45128	5.80128	1.95307	31.9246	24.6146	22.1816	7.64572	23.7833	18.1633	16.3803	5.69265	36.042	27.6364	22.7181	7.64572	1247.73	956.741	786.474	264.686	28.3962	0.787866
Tippah County, Mississippi	28139	6	22232	6.66502	4.20852	1.11832	0.073122	3.44572	1.82112	0.579601	0.022	23.9181	18.9533	17.0807	5.89325	20.4724	17.1321	16.5011	5.87125	27.1374	21.3407	17.6194	5.94437	1220.65	959.907	792.526	267.379	21.193	0.780953
Tishomingo County, Mississippi	28141	6	19593	4.86808	2.7719	0.622051	0.006	2.16	0.795	0.27	0.006	21.0822	16.706	15.0555	5.1945	18.9222	15.911	14.7855	5.1885	23.7903	18.6829	15.4075	5.1945	1214.22	953.551	786.38	265.12	18.5958	0.781654
Tunica County, Mississippi	28143	2	10778	215.51	212.377	210.432	77.5029	214.018	211.288	210.238	77.5029	11.9118	9.18424	8.27644	2.85279	-202.106	-202.103	-201.961	-74.6501	13.404	10.2736	8.47042	2.85279	1243.64	953.197	785.9	264.686	10.5512	0.787168
Union County, Mississippi	28145	6	27134	5.30197	3.50727	0.952377	0.0381122	1.53	0.75	0.45	0.033	29.1919	23.1323	20.8469	7.19267	27.6619	22.3823	20.3969	7.15967	32.9638	25.8896	21.3493	7.19779	1214.85	954.139	786.809	265.268	25.7661	0.781646
Walthall County, Mississippi	28147	6	15443	5.35305	3.27401	1.38421	0.087	3.21145	1.71065	1.1058	0.087	17.0675	13.1594	11.8587	4.08755	13.856	11.4488	10.7529	4.00055	19.2091	14.7228	12.1371	4.08755	1243.87	953.362	785.929	264.686	15.1215	0.787207
Warren County, Mississippi	28149	5	48773	46.8532	15.6288	5.50827	0.824642	40.1107	10.7067	4.63173	0.824642	53.9035	41.5608	37.4528	12.9095	13.7928	30.8541	32.8211	12.0849	60.6461	46.4829	38.3294	12.9095	1243.44	953.046	785.872	264.686	47.7365	0.787133
Washington County, Mississippi	28151	5	51137	401.179	384.788	377.402	137.201	394.119	379.634	376.484	137.201	56.514	43.5736	39.2666	13.5347	-337.605	-336.06	-337.217	-123.666	63.5743	48.7276	40.1845	13.5347	1243.22	952.884	785.82	264.676	50.0396	0.787104
Wayne County, Mississippi	28153	6	20747	8.68242	6.51662	1.96356	0.134122	5.82251	4.4289	1.59178	0.134122	22.9294	17.6791	15.9316	5.49144	17.1069	13.2502	14.3399	5.35732	25.7893	19.7668	16.3034	5.49144	1243.04	952.756	785.821	264.686	20.2979	0.787065
Webster County, Mississippi	28155	6	10253	2.34984	1.57933	0.583744	0.0638976	0.83	0.44	0.29	0.023	11.0349	8.74432	7.8804	2.71892	10.2049	8.30432	7.5904	2.69592	12.5547	9.88364	8.17414	2.75982	1224.49	963.976	797.244	269.172	9.79492	0.780177
Wilkinson County, Mississippi	28157	6	9878	4.90648	4.13361	3.09326	1.0191	3.53861	3.13507	2.91544	1.0191	10.9171	8.41732	7.58532	2.61457	7.37847	5.28225	4.66988	1.59547	12.2849	9.41586	7.76315	2.61457	1243.67	953.215	785.903	264.686	9.67037	0.787173
Winston County, Mississippi	28159	6	19198	4.57335	3.06548	1.11411	0.0712244	1.92054	1.12893	0.769241	0.0712244	20.654	16.3667	14.7497	5.089	18.7335	15.2378	13.9805	5.01778	23.3068	18.3033	15.0946	5.089	1214.02	953.394	786.258	265.08	18.2178	0.781652
Yalobusha County, Mississippi	28161	6	12678	2.96473	1.77595	0.448114	0.011	1.21	0.495	0.22	0.011	13.6395	10.8083	9.74043	3.36068	12.4295	10.3133	9.52043	3.34968	15.3942	12.0892	9.96855	3.36068	1214.25	953.559	786.287	265.08	12.0336	0.781692
Yazoo County, Mississippi	28163	3	28065	62.7049	51.0576	43.1665	14.5335	58.8223	48.2233	42.6618	14.5335	31.0172	23.915	21.5511	7.42842	-27.8051	-24.3083	-21.1106	-7.10512	34.8998	26.7493	22.0559	7.42842	1243.53	953.119	785.885	264.686	27.4714	0.78715
Adair County, Missouri	29001	5	25607	4.33114	3.13051	1.17328	0.0931926	1.25	0.862632	0.712632	0.0676316	31.8727	16.7178	15.7013	5.23357	30.6227	15.8552	14.9887	5.16593	34.9539	18.9857	16.1619	5.25913	1365.01	741.427	631.153	205.378	29.6947	0.849541
Andrew County, Missouri	29003	4	17291	27.3357	11.0285	3.37866	0.0960098	25.0836	9.35089	2.9777	0.05	33.102	11.2621	10.5757	3.50745	8.01844	1.91125	7.59802	3.45745	35.3542	12.9398	10.9767	3.55346	2044.66	748.353	634.821	205.509	31.8007	0.89949
Atchison County, Missouri	29005	6	5685	8.80769	8.46719	8.06888	2.89717	8.26883	8.07383	7.99883	2.89717	10.8834	3.70281	3.47713	1.15319	2.61458	-4.37102	-4.52171	-1.74398	11.4223	4.09617	3.54718	1.15319	2009.19	720.523	623.954	202.848	10.2691	0.89904
Audrain County, Missouri	29007	5	25529	39.9175	17.4043	15.4494	3.7072	37.2509	15.4523	15.1023	3.7072	64.1831	16.6233	15.6098	5.17397	26.9322	1.17096	0.507504	1.46677	66.8497	18.5753	15.9569	5.17397	2618.58	727.615	625.049	202.67	61.6758	0.922603
Barry County, Missouri	29009	6	35597	28.2206	22.3595	17.8452	1.76225	24.3519	19.5353	17.3423	1.76225	32.7546	23.1922	21.7791	7.2276	8.40272	3.65686	4.43681	5.46535	36.6233	26.0163	22.282	7.2276	1028.83	730.858	625.951	203.04	29.3957	0.80265
Barton County, Missouri	29011	6	12402	19.9145	18.8407	17.6208	5.31994	18.3808	17.7211	17.4214	5.31994	11.4117	8.08017	7.58783	2.5181	-6.96908	-9.64096	-9.83356	-2.80184	12.9454	9.19974	7.7872	2.5181	1043.81	741.795	627.899	203.04	10.4273	0.805483
Bates County, Missouri	29013	2	17049	4.8785	3.84136	2.38127	0.352492	3.10995	2.55031	2.15136	0.352492	8.92273	3.93262	3.08135	1.07895	5.81278	1.38231	0.929985	0.726459	10.6913	5.22367	3.31126	1.07895	627.092	306.391	194.22	63.2853	9.61233	0.899081
Benton County, Missouri	29015	6	19056	7.69213	6.12958	4.54576	0.491356	5.73015	4.69015	4.29015	0.491356	17.5344	12.4154	11.6589	3.86912	11.8043	7.72524	7.36875	3.37777	19.4964	13.8548	11.9145	3.86912	1023.11	727.058	625.237	203.04	15.6273	0.801547
Bollinger County, Missouri	29017	4	12363	20.3441	19.2781	18.2006	6.48103	19.0729	18.3502	18.0354	6.48103	29.9547	8.05026	7.55947	2.50568	10.8818	-10.2999	-10.4759	-3.97535	31.2259	8.97819	7.72472	2.50568	2525.75	726.215	624.825	202.676	28.7202	0.919756
Boone County, Missouri	29019	4	162642	34.5828	18.8411	5.01636	0.572372	12.172	2.48125	2.10296	0.572372	408.902	105.905	99.4481	32.9627	396.73	103.423	97.3451	32.3903	431.313	122.265	102.361	32.9627	2651.92	751.74	629.367	202.67	398.35	0.923576
Buchanan County, Missouri	29021	4	89201	82.0141	10.9761	2.3045	0.0599974	68.4599	1.08147	0.542455	0.0599974	170.767	58.0993	54.5582	18.0943	102.307	57.0178	54.0157	18.0343	184.321	67.9939	56.3202	18.0943	2066.36	762.255	631.385	202.848	166.227	0.901833
Butler County, Missouri	29023	5	42794	470.114	467.089	463.239	170.766	465.071	463.407	462.583	170.766	73.3773	27.8792	26.1804	8.68689	-391.694	-435.528	-436.403	-162.079	78.4204	31.5607	26.836	8.68689	1832.51	737.503	627.097	202.993	69.7335	0.889227
Caldwell County, Missouri	29025	2	9424	1.90389	1.53845	0.931361	0.120234	1.07485	0.93325	0.823586	0.120234	14.302	2.17199	1.70144	0.594597	13.2272	1.23874	0.877854	0.474363	15.131	2.77719	1.80921	0.594597	1605.59	294.694	191.98	63.0939	14.5364	0.960704
Callaway County, Missouri	29027	4	44332	1118.9	10.2122	6.14599	1.70389	1114.09	6.70225	5.52092	1.70389	111.456	28.8669	27.107	8.98478	-1002.63	22.1646	21.586	7.28089	116.264	32.3769	27.732	8.98478	2622.58	730.327	625.553	202.67	107.28	0.922721
Camden County, Missouri	29029	6	44002	20.748	16.5739	12.4746	1.2246	15.9813	13.0942	11.8549	1.2246	75.4486	28.6662	26.9194	8.93211	59.4673	15.572	15.0645	7.70751	80.2154	32.1459	27.5391	8.93211	1822.99	730.556	625.86	202.993	71.2833	0.888648
Cape Girardeau County, Missouri	29031	4	75674	52.311	32.4728	19.5838	5.52527	43.413	25.9773	18.4271	5.52527	190.254	49.2753	46.2712	15.3369	146.841	23.298	27.844	9.81161	199.152	55.7708	47.4279	15.3369	2631.71	736.988	626.74	202.67	183.815	0.922989
Carroll County, Missouri	29033	6	9295	7.26787	6.30474	5.34179	1.74003	6.10726	5.43953	5.18953	1.74003	17.7944	6.05411	5.68512	1.88547	11.6872	0.614578	0.495582	0.145443	18.955	6.91932	5.83738	1.88547	2039.27	744.413	628.013	202.848	17.0696	0.900529
Carter County, Missouri	29035	6	6265	1.4961	0.908249	0.30727	0.015	0.777634	0.383765	0.213869	0.015	10.7424	4.08149	3.83278	1.27175	9.96473	3.69772	3.61891	1.25675	11.4608	4.60597	3.92618	1.27175	1829.34	735.191	626.685	202.993	10.1891	0.889035
Cass County, Missouri	29037	2	99478	32.1869	13.6995	5.22366	0.981021	18.4669	3.68391	3.44006	0.981021	150.969	22.9271	17.9601	6.27646	132.502	19.2432	14.52	5.29543	164.689	32.9427	19.7437	6.27646	1655.54	331.156	198.473	63.0939	158.413	0.961889
Cedar County, Missouri	29039	6	13982	3.60008	2.39285	1.2891	0.109299	2.13551	1.32371	1.09871	0.109299	12.8656	9.10957	8.55451	2.8389	10.73	7.78586	7.4558	2.7296	14.3301	10.1787	8.7449	2.8389	1024.9	727.987	625.44	203.04	11.4912	0.801893
Chariton County, Missouri	29041	6	7831	2.27072	2.09397	1.70434	0.367171	1.62133	1.61992	1.61992	0.367171	14.9841	5.09796	4.78724	1.58769	13.3627	3.47804	3.16732	1.22052	15.6335	5.57201	4.87166	1.58769	1996.36	711.533	622.099	202.745	14.0458	0.898443
Christian County, Missouri	29043	3	77422	16.1229	9.76153	3.23558	0.201459	8.01252	3.84091	2.18122	0.201459	71.24	50.4421	47.3686	15.7197	63.2275	46.6012	45.1873	15.5183	79.3504	56.3627	48.4229	15.7197	1024.91	727.993	625.441	203.04	63.6307	0.801895
Clark County, Missouri	29045	5	7139	3.22518	2.91586	2.44473	0.75573	2.58961	2.45189	2.3621	0.75573	8.88583	4.66078	4.37738	1.45907	6.29622	2.20889	2.01527	0.703341	9.52141	5.12475	4.46	1.45907	1333.72	717.853	624.737	204.38	8.06234	0.846759
Clay County, Missouri	29047	2	221939	197.835	80.6069	20.9316	0.0631727	167.189	58.2357	16.9477	0.0631727	336.818	51.1512	40.0696	14.003	169.629	-7.08446	23.1219	13.9398	367.464	73.5225	44.0535	14.003	1655.7	331.273	198.494	63.0939	353.461	0.961893
Clinton County, Missouri	29049	2	20743	3.64625	2.9561	1.42244	0.187356	1.09015	1.09015	1.09015	0.187356	31.4799	4.78073	3.74501	1.30876	30.3897	3.69058	2.65486	1.1214	34.036	6.64668	4.0773	1.30876	1640.84	320.43	196.563	63.0939	32.7272	0.961548
Cole County, Missouri	29051	4	75990	14.1316	9.38186	2.60041	0.119597	4.08687	2.04918	1.29459	0.119597	191.031	49.4765	46.4601	15.3995	186.944	47.4273	45.1655	15.2799	201.076	56.8092	47.7659	15.3995	2646.08	747.588	628.582	202.652	185.676	0.923414
Cooper County, Missouri	29053	6	17601	7.56228	6.27789	4.69804	0.535142	5.50359	4.77505	4.43041	0.535142	44.2511	11.4609	10.7622	3.5672	38.7475	6.68588	6.33179	3.03206	46.3098	12.9638	11.0298	3.5672	2631.09	736.536	626.659	202.67	42.7426	0.922971
Crawford County, Missouri	29055	6	24696	5.96587	3.65396	1.21357	0.0693366	3.35447	1.73644	0.838025	0.054	59.8367	16.081	15.1006	5.00528	56.4823	14.3445	14.2626	4.95128	62.4481	17.9985	15.4761	5.02061	2528.67	728.802	626.666	203.297	57.4275	0.919603
Dade County, Missouri	29057	6	7883	11.4088	10.7448	10.0939	3.36847	10.6489	10.19	9.99514	3.36847	7.25356	5.13594	4.823	1.60056	-3.39535	-5.05409	-5.17214	-1.76791	8.01348	5.69069	4.92179	1.60056	1016.55	721.893	624.355	203.04	6.41291	0.800266
Dallas County, Missouri	29059	3	16777	4.6787	3.22177	1.71932	0.188683	2.62	1.645	1.27	0.112	28.7669	10.9298	10.2638	3.40562	26.1469	9.2848	8.99378	3.29362	30.8256	12.5066	10.7131	3.4823	1837.37	745.459	638.559	207.564	27.3433	0.887032
Daviess County, Missouri	29061	6	8433	3.25484	2.79551	1.99941	0.327378	2.09423	1.94827	1.84853	0.327378	16.1442	5.49267	5.15789	1.71062	14.05	3.5444	3.30936	1.38324	17.3048	6.33991	5.30877	1.71062	2052.04	751.797	629.523	202.848	15.5942	0.901148
DeKalb County, Missouri	29063	4	12892	2.74854	2.23906	1.18112	0.113561	0.279621	0.199145	0.0945589	0.025561	24.6806	8.39695	7.88515	2.61512	24.4009	8.1978	7.7906	2.58956	27.1495	10.4369	8.97171	2.70312	2105.92	809.561	695.913	209.674	24.4464	0.900436
Dent County, Missouri	29065	6	15657	45.7914	44.5748	43.2933	4.3558	43.94	43.16	42.86	4.274	26.8465	10.2001	9.57859	3.17826	-17.0935	-32.9599	-33.2814	-1.09574	28.6979	11.615	10.0119	3.26006	1832.91	741.839	639.451	208.217	25.4379	0.886401
Douglas County, Missouri	29067	6	13684	55.7091	54.5146	53.2596	5.37547	53.83	53.05	52.75	5.263	12.5914	8.91542	8.37219	2.77839	-41.2386	-44.1346	-44.3778	-2.48461	14.4704	10.38	8.88175	2.89086	1057.47	758.55	649.061	211.259	11.5796	0.800223
Dunklin County, Missouri	29069	5	31953	154.275	151.212	148.575	54.7294	150.296	148.307	148.057	54.7294	25.632	20.805	19.5366	6.4747	-124.664	-127.502	-128.521	-48.2547	29.6112	23.7099	20.0539	6.4747	926.711	742.023	627.605	202.632	23.1365	0.781343
Franklin County, Missouri	29071	2	101492	1567.94	13.397	4.66753	0.722765	1556.91	5.34819	3.23418	0.722765	209.59	17.6947	12.9426	4.27459	-1347.32	12.3465	9.70847	3.55182	220.615	25.7435	14.376	4.27459	2173.72	253.651	141.647	42.1175	216.341	0.980624
Gasconade County, Missouri	29073	6	15222	3.74266	2.7437	1.11131	0.0884488	2.04322	1.50311	0.89038	0.0884488	38.2675	9.91119	9.30694	3.08485	36.2243	8.40808	8.41656	2.9964	39.967	11.1518	9.52786	3.08485	2625.6	732.609	625.927	202.657	36.8821	0.922815
Gentry County, Missouri	29075	6	6738	2.5521	2.15347	1.63081	0.154113	1.79218	1.595	1.52	0.149001	12.8993	4.38866	4.12117	1.36679	11.1071	2.79366	2.60117	1.21779	13.6592	4.94713	4.23198	1.3719	2027.19	734.214	628.077	203.607	12.2873	0.899562
Greene County, Missouri	29077	3	275174	109.568	40.3488	10.0698	0.562547	71.8757	12.647	4.56877	0.306937	253.202	179.282	168.358	55.8712	181.326	166.635	163.789	55.5643	290.894	206.984	173.859	56.1268	1057.13	752.191	631.814	203.969	234.767	0.807054
Grundy County, Missouri	29079	6	10261	5.80303	3.13167	1.4028	0.172585	4.06212	1.775	0.900004	0.055004	19.6437	6.6833	6.27595	2.08143	15.5816	4.90829	5.37595	2.02642	21.3847	8.03996	6.77874	2.19901	2084.07	783.546	660.632	214.307	19.1857	0.897169
Harrison County, Missouri	29081	6	8957	2.43101	1.75907	1.08667	0.0910019	1.68491	1.21442	0.989674	0.0910019	17.1474	5.83396	5.47838	1.81691	15.4625	4.61955	4.48871	1.72591	17.8935	6.37862	5.57538	1.81691	1997.71	712.138	622.46	202.848	16.0765	0.898459
Henry County, Missouri	29083	6	22272	32.276	4.38083	2.4394	0.435905	29.1535	1.9745	1.62476	0.26209	20.4936	14.5107	13.6265	4.5221	-8.65984	12.5362	12.0018	4.26001	23.6162	16.917	14.4412	4.69591	1060.35	759.564	648.4	210.844	18.9203	0.801157
Hickory County, Missouri	29085	6	9627	2.56877	1.85996	1.10963	0.184805	1.29763	0.838765	0.643869	0.057	8.8583	6.2722	5.89002	1.95466	7.56066	5.43343	5.24615	1.89766	10.1294	7.29339	6.35578	2.08247	1052.19	757.597	660.204	216.315	8.04697	0.794414
Holt County, Missouri	29087	6	4912	23.5029	23.0063	22.5	8.23542	22.8673	22.5423	22.4173	8.23542	9.40357	3.19933	3.00433	0.99639	-13.4638	-19.343	-19.413	-7.23902	10.0391	3.6633	3.08696	0.99639	2043.8	745.786	628.452	202.848	9.04275	0.900749
Howard County, Missouri	29089	6	10144	13.4058	13.0289	12.2827	4.35658	12.2866	12.2119	12.1372	4.35658	25.5133	6.60789	6.20503	2.0567	13.2267	-5.60405	-5.93216	-2.29988	26.6325	7.42487	6.35052	2.0567	2625.44	731.947	626.037	202.75	24.5758	0.922775
Howell County, Missouri	29091	5	40400	13.3043	9.06741	5.60728	0.481561	9.67054	6.41473	5.13489	0.481561	69.2724	26.3196	24.7158	8.20093	59.6018	19.9049	19.5809	7.71936	72.9062	28.9723	25.1882	8.20093	1804.61	717.135	623.47	202.993	64.7053	0.887514
Iron County, Missouri	29093	6	10630	10.0666	8.79804	5.51082	0.489224	8.32975	7.42618	5.25356	0.479	25.7558	6.9218	6.49981	2.15444	17.426	-0.504379	1.24625	1.67544	27.4927	8.29366	6.75707	2.16467	2586.33	780.212	635.66	203.637	25.328	0.921264
Jackson County, Missouri	29095	1	674158	721.094	90.5982	18.1644	0.322604	618.353	15.5187	4.55558	0.215248	1023.11	155.376	121.715	42.5353	404.76	139.857	117.159	42.32	1125.85	230.456	135.323	42.6426	1670.01	341.842	200.73	63.2531	1083.21	0.962124
Jasper County, Missouri	29097	4	117404	76.6582	23.6093	10.5213	2.30683	63.2007	13.7853	8.77182	2.30683	108.029	76.4912	71.8305	23.8377	44.8288	62.7059	63.0586	21.5308	121.487	86.3152	73.5799	23.8377	1034.78	735.198	626.724	203.04	97.6493	0.803784
Jefferson County, Missouri	29099	2	218733	850.973	28.9388	6.55689	0.255275	825.053	10.017	3.18726	0.255275	451.696	38.1347	27.8933	9.21237	-373.357	28.1177	24.706	8.95709	477.617	57.0564	31.2629	9.21237	2183.56	260.85	142.927	42.1169	468.404	0.980712
Johnson County, Missouri	29101	5	52595	25.9045	10.2681	6.68747	0.94404	20.82	6.55631	6.02648	0.94404	79.819	12.1218	9.49567	3.31842	58.999	5.56549	3.46919	2.37438	84.9035	15.8335	10.1567	3.31842	1614.29	301.047	193.111	63.0939	81.5851	0.960915
Knox County, Missouri	29103	6	4131	2.45755	2.32422	1.95449	0.243683	2.05687	2.03173	1.9024	0.243683	5.14181	2.69697	2.53298	0.844295	3.08494	0.665247	0.630581	0.600612	5.54249	2.98947	2.58507	0.844295	1341.68	723.667	625.773	204.38	4.6982	0.847669
Laclede County, Missouri	29105	5	35571	25.367	22.1567	18.8448	1.8279	21.07	18.99	18.19	1.787	60.9923	23.1736	21.7615	7.22067	39.9223	4.18362	3.57151	5.43367	65.2893	26.3403	22.4163	7.26157	1835.46	740.499	630.184	204.143	58.0277	0.888779
Lafayette County, Missouri	29107	2	33381	8.35893	6.90645	4.8421	0.63711	5.12581	4.54628	4.42179	0.63711	50.6595	7.69346	6.02671	2.10614	45.5337	3.14719	1.60492	1.46903	53.8926	10.0536	6.44702	2.10614	1614.47	301.179	193.134	63.0939	51.7865	0.96092
Lawrence County, Missouri	29109	6	38634	16.7339	13.0535	9.52181	1.46218	12.4783	9.94331	8.96831	1.46218	35.5491	25.1709	23.6372	7.84423	23.0708	15.2276	14.6689	6.38206	39.8047	28.281	24.1907	7.84423	1030.3	732.024	626.15	203.04	31.9605	0.802932
Lewis County, Missouri	29111	5	10211	3.88785	3.55426	2.93237	0.868727	2.89305	2.82805	2.80305	0.868727	12.7095	6.66637	6.26101	2.08693	9.81647	3.83833	3.45797	1.2182	13.7043	7.39258	6.39034	2.08693	1342.11	723.982	625.829	204.38	11.6174	0.847718
Lincoln County, Missouri	29113	2	52566	12.2846	8.80774	4.52439	1.15223	7.19999	5.09601	3.8634	1.15223	108.554	9.16475	6.70348	2.21397	101.354	4.06874	2.84008	1.06174	113.639	12.8765	7.36448	2.21397	2161.83	244.958	140.1	42.1179	111.425	0.980518
Linn County, Missouri	29115	6	12761	6.6845	5.90336	5.12306	0.83121	5.71732	5.19732	4.99732	0.83121	24.4298	8.31162	7.80503	2.58855	18.7124	3.1143	2.80771	1.75734	25.3969	9.01766	7.93076	2.58855	1990.2	706.658	621.484	202.848	22.8084	0.898076
Livingston County, Missouri	29117	6	15195	3.50555	2.46844	1.1577	0.173716	1.28105	0.755023	0.580023	0.0510234	29.0894	9.89696	9.29374	3.08228	27.8084	9.14194	8.71372	3.03126	31.3139	11.6104	9.87142	3.20497	2060.81	764.092	649.649	210.923	28.109	0.89765
McDonald County, Missouri	29119	3	23083	10.4492	5.76195	2.60381	0.223795	7.52	3.555	2.03	0.142	21.2399	15.0391	14.1227	4.68676	13.7199	11.4841	12.0927	4.54476	24.169	17.246	14.6965	4.76856	1047.05	747.131	636.682	206.583	19.4004	0.802699
Macon County, Missouri	29121	6	15566	4.42779	3.08556	1.67431	0.249148	2.7007	1.82478	1.44978	0.249148	19.3748	10.1624	9.54451	3.18138	16.6741	8.33767	8.09472	2.93224	21.1019	11.4232	9.76903	3.18138	1355.64	733.858	627.588	204.38	17.9205	0.849237
Madison County, Missouri	29123	6	12226	2.44312	1.63746	0.683191	0.0780098	1.02	0.565	0.39	0.032	29.6228	7.96105	7.4757	2.47791	28.6028	7.39605	7.0857	2.44591	31.0459	9.03351	7.76889	2.52392	2539.33	738.877	635.44	206.439	28.522	0.918704
Maries County, Missouri	29125	6	9176	2.92717	2.09223	1.31179	0.121337	1.96	1.375	1.15	0.106	23.0621	5.97302	5.60887	1.8591	21.1021	4.59802	4.45887	1.7531	24.0293	6.69025	5.77066	1.87443	2618.71	729.103	628.886	204.276	22.1548	0.921994
Marion County, Missouri	29127	5	28781	10.6714	7.51133	4.59035	1.1523	7.49351	5.19151	4.17723	1.1523	35.8234	18.79	17.6475	5.88227	28.3299	13.5985	13.4702	4.72996	39.0012	21.1098	18.0606	5.88227	1355.1	733.465	627.518	204.38	33.119	0.849177
Mercer County, Missouri	29129	6	3785	2.99924	2.93582	2.79489	0.31001	2.64	2.64	2.64	0.264	7.24604	2.46528	2.31502	0.76778	4.60604	-0.174717	-0.324975	0.50378	7.60527	2.7611	2.46991	0.81379	2009.32	729.485	652.552	215.004	6.79148	0.892997
Miller County, Missouri	29131	6	24748	35.0164	5.17747	3.21856	0.591258	31.3826	2.19872	1.72372	0.156721	62.2196	16.1147	15.1323	5.01569	30.837	13.916	13.4085	4.85897	65.8534	19.0935	16.6271	5.45022	2660.96	771.516	671.856	220.229	60.4032	0.917237
Mississippi County, Missouri	29133	6	14358	114.247	112.993	111.641	41.1674	112.492	111.712	111.412	41.1674	36.0978	9.34924	8.77925	2.90994	-76.3947	-102.363	-102.633	-38.2575	37.8525	10.6302	9.00737	2.90994	2636.34	740.367	627.341	202.67	34.9426	0.923124
Moniteau County, Missouri	29135	4	15607	5.24053	3.65802	2.17189	0.218234	3.47198	2.36698	1.94198	0.218234	39.238	10.1625	9.54296	3.16308	35.766	7.79555	7.60097	2.94484	41.0065	11.4536	9.77287	3.16308	2627.44	733.874	626.185	202.67	37.8434	0.922864
Monroe County, Missouri	29137	6	8840	11.3966	7.75311	5.72538	0.8896	10.2084	6.8857	5.57091	0.8896	11.003	5.7713	5.42037	1.80672	0.794653	-1.1144	-0.15054	0.917121	12.1913	6.63871	5.57484	1.80672	1379.1	750.986	630.638	204.38	10.3846	0.851802
Montgomery County, Missouri	29139	6	12236	3.87137	2.98094	1.71484	0.398742	2.80749	2.20431	1.57653	0.398742	30.7628	7.9675	7.48175	2.47987	27.9554	5.76318	5.90521	2.08113	31.8267	8.74412	7.62005	2.47987	2601.07	714.623	622.757	202.67	29.3468	0.922082
Morgan County, Missouri	29141	6	20565	10.2175	8.7289	7.05913	0.775366	7.62	6.71	6.36	0.622	51.703	13.3909	12.5745	4.16792	44.083	6.68094	6.21455	3.54592	54.3005	15.4098	13.2737	4.32128	2640.43	749.324	645.45	210.128	49.9793	0.920419
New Madrid County, Missouri	29143	6	18956	272.027	268.336	266.067	98.2497	270.203	267.005	265.83	98.2497	32.51	12.352	11.5993	3.84875	-237.693	-254.653	-254.231	-94.4009	34.3338	13.6833	11.8364	3.84875	1811.24	721.848	624.413	203.036	30.4851	0.887902
Newton County, Missouri	29145	4	58114	17.3202	10.468	5.02407	0.649088	11.6968	6.36292	4.29303	0.649088	53.4718	37.8612	35.5543	11.799	41.7751	31.4983	31.2612	11.15	59.0953	41.9663	36.2853	11.799	1016.89	722.138	624.381	203.033	47.2962	0.800339
Nodaway County, Missouri	29147	5	23370	6.6865	3.54239	1.69817	0.128693	3.81262	1.44446	1.32456	0.128693	44.7397	15.2216	14.2938	4.74056	40.9271	13.7771	12.9693	4.61187	47.6136	17.3195	14.6674	4.74056	2037.38	741.1	627.618	202.848	42.873	0.900437
Oregon County, Missouri	29149	6	10881	3.39061	2.20994	1.2415	0.134122	2.40962	1.49382	1.11397	0.134122	18.6572	7.0887	6.65674	2.20877	16.2476	5.59488	5.54277	2.07465	19.6382	7.80482	6.78427	2.20877	1804.82	717.289	623.497	202.993	17.4295	0.887527
Osage County, Missouri	29151	4	13878	37.3514	3.25386	1.83165	0.163732	36.0112	2.27551	1.65742	0.163732	34.9086	9.04125	8.49004	2.81408	-1.10258	6.76574	6.83262	2.65035	36.2488	10.0196	8.66426	2.81408	2611.96	721.977	624.316	202.773	33.4348	0.922368
Ozark County, Missouri	29153	6	9723	20.4306	19.5175	18.6773	1.89346	19.27	18.62	18.37	1.827	8.94663	6.33474	5.94876	1.97415	-10.3234	-12.2853	-12.4212	0.147155	10.1072	7.23228	6.25604	2.04061	1039.52	743.832	643.427	209.875	8.06663	0.798104
Pemiscot County, Missouri	29155	6	18296	152.644	150.986	149.094	54.6476	150.116	149.141	148.766	54.6476	31.3715	11.9194	11.1931	3.71396	-118.744	-137.221	-137.573	-50.9336	33.8999	13.7652	11.5218	3.71396	1852.86	752.359	629.742	202.993	30.186	0.890443
Perry County, Missouri	29157	6	18971	7.0903	5.69559	3.94483	0.355112	4.92107	4.11206	3.66283	0.355112	47.6955	12.353	11.5999	3.84486	42.7744	8.24095	7.93706	3.48975	49.8647	13.9365	11.8819	3.84486	2628.47	734.623	626.319	202.67	46.0198	0.922894
Pettis County, Missouri	29159	5	42201	14.0981	8.60718	3.96473	0.412376	9.27611	5.08709	3.33787	0.412376	80.79	27.4868	25.8115	8.5604	71.5138	22.3997	22.4736	8.14802	85.612	31.0069	26.4383	8.5604	2028.67	734.742	626.486	202.848	77.0516	0.900009
Phelps County, Missouri	29161	5	45156	16.171	12.8675	8.82002	0.807785	10.7411	8.90366	8.11413	0.807785	109.41	29.4037	27.611	9.15202	98.6689	20.5	19.4969	8.34424	114.84	33.3675	28.3169	9.15202	2543.18	738.939	627.091	202.676	105.688	0.920306
Pike County, Missouri	29163	6	18516	18.4572	5.10369	2.33762	0.306939	16.5366	3.7017	2.08795	0.306939	46.5516	12.0567	11.3217	3.75264	30.0149	8.35504	9.23372	3.44571	48.4721	13.4587	11.5713	3.75264	2617.85	726.87	624.938	202.67	44.7194	0.922581
Platte County, Missouri	29165	2	89322	990.555	11.8692	4.46619	1.20012	979.46	3.76996	3.02386	1.20012	135.556	20.5864	16.1265	5.63567	-843.904	16.8165	13.1026	4.43555	146.651	28.6857	17.5688	5.63567	1641.83	321.149	196.691	63.0939	141.016	0.961571
Polk County, Missouri	29167	3	31137	8.96441	6.57449	3.69843	0.544405	5.26153	3.87138	3.21705	0.544405	28.6508	20.2864	19.0503	6.32204	23.3892	16.415	15.8333	5.77764	32.3536	22.9895	19.5317	6.32204	1039.07	738.335	627.283	203.04	26.0316	0.804596
Pulaski County, Missouri	29169	5	52274	9.62707	7.16784	1.82879	0.122683	0.936342	0.767654	0.518688	0.046	126.664	34.0406	31.9652	10.5953	125.727	33.2729	31.4466	10.5493	135.354	40.4407	33.2753	10.672	2589.32	773.63	636.556	204.154	124.682	0.921155
Putnam County, Missouri	29171	6	4979	2.65383	2.49738	2.20723	0.248018	2.17025	2.14436	2.14436	0.248018	9.53184	3.24297	3.04531	1.00998	7.36159	1.09861	0.900954	0.761963	10.0154	3.59599	3.10818	1.00998	2011.53	722.231	624.258	202.848	9.00544	0.899157
Ralls County, Missouri	29173	5	10167	3.46337	2.79487	1.11326	0.17833	2.34421	1.97789	0.967772	0.17833	12.6548	6.63765	6.23404	2.07793	10.3105	4.65976	5.26626	1.8996	13.7739	7.45463	6.37953	2.07793	1354.77	733.219	627.474	204.38	11.696	0.84914
Randolph County, Missouri	29175	5	25414	712.97	3.37432	1.80585	0.426225	710.87	1.84123	1.53283	0.426225	63.894	16.5484	15.5395	5.15067	-646.976	14.7072	14.0067	4.72444	65.9941	18.0815	15.8125	5.15067	2596.76	711.477	622.197	202.67	60.8435	0.921953
Ray County, Missouri	29177	2	23494	8.61944	7.43008	5.51583	1.66378	6.03571	5.54396	5.17995	1.66378	35.6548	5.41476	4.24168	1.48233	29.6191	-0.129195	-0.938263	-0.181453	38.2386	7.30089	4.57757	1.48233	1627.59	310.755	194.84	63.0939	36.7563	0.961235
Reynolds County, Missouri	29179	6	6696	8.36868	6.78457	1.30394	0.0231122	3.94343	3.05955	0.678881	0.018	16.2191	4.35885	4.09311	1.35671	12.2757	1.29929	3.41423	1.33871	20.6444	8.08387	4.71817	1.36182	3083.09	1207.27	704.625	203.379	19.2825	0.934034
Ripley County, Missouri	29181	6	14100	43.4645	42.5452	41.4466	15.1447	41.9723	41.4523	41.2523	15.1447	24.1767	9.1858	8.62605	2.8622	-17.7956	-32.2665	-32.6263	-12.2825	25.669	10.2787	8.82031	2.8622	1820.49	728.986	625.554	202.993	22.8067	0.888495
St. Charles County, Missouri	29183	2	360485	545.741	33.9162	7.0893	0.411432	503.342	2.90306	1.37737	0.388432	744.44	62.8497	45.9709	15.1829	241.098	59.9466	44.5935	14.7944	786.838	93.8628	51.6828	15.2059	2182.72	260.379	143.37	42.1817	771.632	0.980675
St. Clair County, Missouri	29185	6	9805	2.64916	2.14294	1.4958	0.189683	0.4	0.14	0.04	0	9.02209	6.38817	5.99892	1.9908	8.62209	6.24817	5.95892	1.9908	11.2712	8.39111	7.45472	2.18049	1149.54	855.799	760.298	222.385	9.09076	0.806544
Ste. Genevieve County, Missouri	29186	6	18145	12.0359	8.35772	2.37744	0.196917	9.1438	5.97667	1.13213	0	45.6188	11.8152	11.0948	3.67745	36.475	5.83849	9.9627	3.67745	48.5109	14.1962	12.3401	3.87437	2673.52	782.376	680.085	213.523	44.6366	0.920134
St. Francois County, Missouri	29187	5	65359	13.5575	8.18669	2.15473	0.133133	6.28909	2.78358	0.896646	0.0971333	134.984	11.396	8.33555	2.75299	128.694	8.61247	7.4389	2.65586	142.252	16.7992	9.59364	2.78899	2176.47	257.029	146.784	42.6719	139.463	0.980394
St. Louis County, Missouri	29189	2	998954	775.473	157.417	36.3554	0.524405	658.236	71.8254	21.0884	0.521405	2062.95	174.165	127.392	42.0739	1404.71	102.34	106.303	41.5524	2180.18	259.757	142.659	42.0769	2182.47	260.029	142.808	42.1209	2138.11	0.9807
Saline County, Missouri	29195	5	23370	7.93268	5.6758	3.27916	0.655736	5.04499	3.56778	2.90376	0.655736	44.7397	15.2216	14.2938	4.74056	39.6947	11.6538	11.3901	4.08483	47.6274	17.3296	14.6692	4.74056	2037.97	741.532	627.695	202.848	42.8869	0.900466
Schuyler County, Missouri	29197	5	4431	0.903052	0.802328	0.578497	0.053	0.53	0.53	0.53	0.053	5.51522	2.89283	2.71693	0.905609	4.98522	2.36283	2.18693	0.852609	5.88827	3.16516	2.76543	0.905609	1328.88	714.322	624.109	204.38	4.98266	0.846201
Scotland County, Missouri	29199	6	4843	1.44901	1.31641	1.0047	0.179626	0.661451	0.655694	0.625849	0.0620458	6.02803	3.16181	2.96955	0.989814	5.36658	2.50612	2.3437	0.927768	6.81558	3.82253	3.34841	1.10739	1407.31	789.289	691.391	228.659	5.70819	0.83752
Scott County, Missouri	29201	5	39191	299.238	137.219	132.958	48.7243	294.043	133.427	132.283	48.7243	98.521	25.5167	23.961	7.94204	-195.522	-107.91	-108.322	-40.7823	103.716	29.3091	24.6364	7.94205	2646.43	747.853	628.624	202.65	95.7741	0.923425
Shannon County, Missouri	29203	6	8441	2.34481	1.44638	0.616077	0.0503366	1.41909	0.759414	0.459672	0.035	14.4735	5.4991	5.16401	1.71347	13.0544	4.73969	4.70433	1.67847	15.3992	6.18607	5.32041	1.7288	1824.33	732.86	630.306	204.81	13.6704	0.887734
Shelby County, Missouri	29205	6	6373	2.87541	2.67748	2.21489	0.588391	2.17076	2.16308	2.12329	0.588391	7.9324	4.16069	3.90769	1.30252	5.76164	1.99761	1.7844	0.714125	8.63705	4.67509	3.9993	1.30252	1355.26	733.577	627.538	204.38	7.33454	0.849194
Stoddard County, Missouri	29207	6	29968	460.752	458.205	454.461	167.365	457.519	455.845	454.041	167.365	51.385	19.5234	18.3337	6.0833	-406.134	-436.321	-435.707	-161.282	54.6181	21.8836	18.754	6.0833	1822.55	730.232	625.802	202.993	48.5348	0.888621
Stone County, Missouri	29209	5	32202	7.6767	5.52171	2.87153	0.236449	3.98763	2.81377	2.34387	0.216	29.6307	20.9803	19.7019	6.53828	25.6431	18.1665	17.3581	6.32228	33.3198	23.6882	20.2296	6.55873	1034.71	735.614	628.209	203.675	26.7611	0.803158
Sullivan County, Missouri	29211	6	6714	4.95572	3.92578	3.07034	0.283	4.03	3.25	2.95	0.283	12.8533	4.37303	4.10649	1.36192	8.82334	1.12303	1.15649	1.07892	13.7791	5.04881	4.22684	1.36192	2052.29	751.982	629.556	202.848	12.4171	0.90116
Taney County, Missouri	29213	5	51675	52.1208	42.5469	35.9849	3.57032	43.0708	35.8322	34.4598	3.42207	47.5488	33.6674	31.616	10.4921	4.47803	-2.16484	-2.84383	7.07	56.5988	40.382	33.141	10.6403	1095.28	781.461	641.336	205.909	45.9585	0.812004
Texas County, Missouri	29215	6	26008	6.19297	4.19805	1.97219	0.155449	3.45726	2.20098	1.61655	0.155449	44.5949	16.9436	15.9111	5.27945	41.1377	14.7426	14.2945	5.124	47.3307	18.9406	16.2667	5.27945	1819.85	728.262	625.451	202.993	42.0512	0.888456
Vernon County, Missouri	29217	6	21159	17.5707	14.5219	12.0451	3.29808	14.9586	12.615	11.7056	3.29808	19.4695	13.7855	12.9456	4.29612	4.51086	1.17054	1.24	0.998032	22.0816	15.6924	13.2851	4.29612	1043.6	741.644	627.872	203.04	17.7854	0.805443
Warren County, Missouri	29219	2	32513	5.77831	3.90161	1.267	0.119683	1.97871	1.12791	0.773056	0.119683	67.1428	5.66856	4.14622	1.36938	65.1641	4.54065	3.37317	1.2497	70.9424	8.44226	4.64017	1.36938	2181.97	259.658	142.717	42.1179	69.573	0.980697
Washington County, Missouri	29221	6	25195	13.2526	10.9903	8.35443	1.22058	9.19046	7.57359	6.37186	0.602	49.7347	4.39299	3.21325	1.06133	40.5442	-3.1806	-3.15861	0.459335	53.7968	7.80974	5.19582	1.67991	2135.22	309.972	206.224	66.6764	52.1169	0.968773
Wayne County, Missouri	29223	6	13521	2.46129	1.69686	0.601793	0.0453366	1.21779	0.789104	0.440138	0.0453366	23.1874	8.8099	8.27305	2.74508	21.9696	8.02079	7.83292	2.69974	24.4309	9.71765	8.43471	2.74508	1806.88	718.708	623.823	203.023	21.6858	0.887639
Webster County, Missouri	29225	3	36202	8.45281	5.86844	2.9638	0.394161	3.99	2.43	1.83	0.159	33.3113	23.5864	22.1492	7.35044	29.3213	21.1564	20.3192	7.19144	37.7741	27.0248	23.283	7.5856	1043.43	746.501	643.142	209.535	30.1885	0.799185
Worth County, Missouri	29227	6	2171	0.604885	0.541466	0.400535	0.037	0.37	0.37	0.37	0.037	4.15618	1.41404	1.32785	0.440383	3.78618	1.04404	0.957852	0.403383	4.39107	1.5855	1.35839	0.440383	2022.6	730.31	625.696	202.848	3.95068	0.899709
Wright County, Missouri	29229	6	18815	5.1145	3.678	2.02162	0.164112	2.94527	2.09446	1.73962	0.164112	32.2614	12.2575	11.5106	3.81932	29.3161	10.163	9.77096	3.65521	34.4306	13.841	11.7926	3.81932	1829.96	735.638	626.765	202.993	30.6113	0.889072
St. Louis city, Missouri	29510	1	319294	126.399	58.489	13.7648	0	88.9	31.115	8.89	0	659.376	55.6681	40.718	13.448	570.476	24.5531	31.828	13.448	696.875	83.0421	45.5928	13.448	2182.55	260.08	142.793	42.1179	683.427	0.980702
Beaverhead County, Montana	30001	6	9246	667.74	665.956	664.228	244.8	665.751	664.504	663.969	244.8	46.8157	45.2314	44.5152	16.2341	-618.935	-619.273	-619.454	-228.566	48.8053	46.6838	44.7739	16.2341	5278.54	5049.08	4842.51	1755.8	32.5713	0.667371
Big Horn County, Montana	30003	6	12865	369.603	366.638	360.834	132.568	366.189	363.931	360.374	132.568	65.3565	62.9382	61.9417	22.591	-300.833	-300.993	-298.432	-109.977	68.7701	65.6458	62.4021	22.591	5345.52	5102.67	4850.53	1756	46.1792	0.6715
[truncated: 1,543 more rows]
