# Supplementary material for: A spatially detailed blue water footprint of the United States economy
Source: Copernicus journal article supplement (doi:10.5194/hess-22-3007-2018), 2018-05-22
Supplement: Supplementary file 2 [file hess-22-3007-2018-supplement.zip]

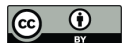

## *Supplement of*

# **A spatially detailed blue water footprint of the United States economy**

**Richard R. Rushforth and Benjamin L. Ruddell**

*Correspondence to:* Richard R. Rushforth ([richard.rushforth@nau.edu](mailto:richard.rushforth@nau.edu))

- [hess-22-3007-2018-supplement-title-page.pdf](#)
- [hess-2017-650-supplement-version4](#)
  - [.DS\\_Store](#)
  - [hess-2017-650-supplment-DataTable-version4.xlsx](#)
  - [hess-2017-650-supplment-version4.pdf](#)

The copyright of individual parts of the supplement might differ from the CC BY 4.0 License.
